# Supplementary material for: Gene- and domain-aware calibration increases the clinical utility of variant effect predictors
Source: bioRxiv preprint, doi:10.64898/2026.02.17.706269, version 2 (2026-03-31)
Supplement: Supplementary Table 4 [file 706269_file07.xlsx]

## Sheet: Sheet1
	REVEL	AlphaMissense	MutPred2
Number of genes	2753	2750	2747
Number of variants	12822099	12849878	12853941
Number of non-Pfam variants	6328351	6381295	6392498
Number of Pfam variants	6493748	6468583	6461443
Number of gene-domain pairs	11565	11492	11464
