# Supplementary material for: Gene- and domain-aware calibration increases the clinical utility of variant effect predictors
Source: bioRxiv preprint, doi:10.64898/2026.02.17.706269, version 2 (2026-03-31)
Supplement: Supplementary Table 8 [file 706269_file11.xlsx]

## Sheet: REVEL
HGNC Gene Symbol	Variation	ClinGen Classification	ClinGen Evidence Point	Hybrid Calibration Evidence Point	Calibration Approach
BMPR2	NM_001204.7(BMPR2):c.1016T>A (p.Val339Asp)	Uncertain Significance	1	4	Gene-specific
BMPR2	NM_001204.7(BMPR2):c.1157A>T (p.Glu386Val)	Likely Pathogenic	1	4	Gene-specific
BMPR2	NM_001204.7(BMPR2):c.1509A>C (p.Glu503Asp)	Likely Benign	0	0	Gene-specific
BMPR2	NM_001204.7(BMPR2):c.1019T>C (p.Leu340Pro)	Uncertain Significance	1	4	Gene-specific
BMPR2	NM_001204.7(BMPR2):c.1126G>A (p.Glu376Lys)	Uncertain Significance	0	-1	Gene-specific
BMPR2	NM_001204.7(BMPR2):c.1766A>G (p.Tyr589Cys)	Likely Benign	0	0	Gene-specific
BMPR2	NM_001204.7(BMPR2):c.1472G>A (p.Arg491Gln)	Pathogenic	1	4	Gene-specific
BMPR2	NM_001204.7(BMPR2):c.797G>C (p.Arg266Thr)	Uncertain Significance	0	0	Gene-specific
BMPR2	NM_001204.7(BMPR2):c.1087C>G (p.Leu363Val)	Uncertain Significance	-1	-2	Gene-specific
BMPR2	NM_001204.7(BMPR2):c.1156G>A (p.Glu386Lys)	Likely Pathogenic	1	4	Gene-specific
BMPR2	NM_001204.7(BMPR2):c.1171G>A (p.Ala391Thr)	Likely Pathogenic	1	2	Gene-specific
BMPR2	NM_001204.7(BMPR2):c.100T>C (p.Cys34Arg)	Pathogenic	1	4	Gene-specific
BMPR2	NM_001204.7(BMPR2):c.2526G>T (p.Arg842Ser)	Uncertain Significance	0	-1	Gene-specific
BMPR2	NM_001204.7(BMPR2):c.908G>A (p.Arg303His)	Likely Pathogenic	0	-1	Gene-specific
BMPR2	NM_001204.7(BMPR2):c.1481C>T (p.Ala494Val)	Uncertain Significance	1	2	Gene-specific
BMPR2	NM_001204.7(BMPR2):c.2186G>C (p.Gly729Ala)	Likely Benign	0	-2	Gene-specific
BMPR2	NM_001204.7(BMPR2):c.1040G>A (p.Cys347Tyr)	Likely Pathogenic	1	4	Gene-specific
BMPR2	NM_001204.7(BMPR2):c.1157A>G (p.Glu386Gly)	Likely Pathogenic	1	4	Gene-specific
BMPR2	NM_001204.7(BMPR2):c.2656C>T (p.Arg886Cys)	Likely Benign	0	-1	Gene-specific
BMPR2	NM_001204.7(BMPR2):c.2618G>A (p.Arg873Gln)	Benign	0	0	Gene-specific
BMPR2	NM_001204.7(BMPR2):c.1042G>A (p.Val348Ile)	Likely Benign	0	0	Gene-specific
BMPR2	NM_001204.7(BMPR2):c.1037C>A (p.Thr346Asn)	Likely Benign	-1	-2	Gene-specific
BMPR2	NM_001204.7(BMPR2):c.1156G>C (p.Glu386Gln)	Likely Pathogenic	1	4	Gene-specific
BMPR2	NM_001204.7(BMPR2):c.1175T>C (p.Val392Ala)	Uncertain Significance	1	4	Gene-specific
BMPR2	NM_001204.7(BMPR2):c.354T>G (p.Cys118Trp)	Pathogenic	1	3	Gene-specific
BMPR2	NM_001204.7(BMPR2):c.2948G>A (p.Arg983Gln)	Likely Benign	0	-1	Gene-specific
BMPR2	NM_001204.7(BMPR2):c.545G>A (p.Gly182Asp)	Likely Benign	1	1	Gene-specific
BMPR2	NM_001204.7(BMPR2):c.2887G>T (p.Gly963Cys)	Likely Benign	0	-1	Gene-specific
BMPR2	NM_001204.7(BMPR2):c.251G>A (p.Cys84Tyr)	Pathogenic	1	4	Gene-specific
BMPR2	NM_001204.7(BMPR2):c.1157A>C (p.Glu386Ala)	Likely Pathogenic	1	4	Gene-specific
BMPR2	NM_001204.7(BMPR2):c.276A>C (p.Gln92His)	Likely Benign	0	0	Gene-specific
BMPR2	NM_001204.7(BMPR2):c.86A>G (p.Asn29Ser)	Likely Benign	0	-2	Gene-specific
BMPR2	NM_001204.7(BMPR2):c.932G>A (p.Gly311Glu)	Uncertain Significance	1	4	Gene-specific
BMPR2	NM_001204.7(BMPR2):c.220A>G (p.Lys74Glu)	Likely Benign	0	-2	Gene-specific
BMPR2	NM_001204.7(BMPR2):c.901T>C (p.Ser301Pro)	Pathogenic	0	-1	Gene-specific
BMPR2	NM_001204.7(BMPR2):c.1259G>A (p.Cys420Tyr)	Likely Pathogenic	1	3	Gene-specific
BRCA1	NM_007294.4(BRCA1):c.3082C>T (p.Arg1028Cys)	Benign	0	-2	Gene-specific
BRCA1	NM_007294.4(BRCA1):c.1233T>G (p.Asp411Glu)	Benign	0	0	Gene-specific
BRCA1	NM_007294.4(BRCA1):c.191G>A (p.Cys64Tyr)	Pathogenic	1	3	Gene-specific
BRCA1	NM_007294.4(BRCA1):c.305C>G (p.Ala102Gly)	Benign	0	-1	Gene-specific
BRCA1	NM_007294.4(BRCA1):c.3418A>G (p.Ser1140Gly)	Benign	0	-2	Gene-specific
BRCA1	NM_007294.4(BRCA1):c.5089T>C (p.Cys1697Arg)	Pathogenic	1	3	Gene-specific
BRCA1	NM_007294.4(BRCA1):c.2155A>G (p.Lys719Glu)	Benign	0	-2	Gene-specific
BRCA1	NM_007294.4(BRCA1):c.5090G>A (p.Cys1697Tyr)	Likely Pathogenic	1	3	Gene-specific
BRCA1	NM_007294.4(BRCA1):c.811G>A (p.Val271Met)	Benign	0	-2	Gene-specific
BRCA1	NM_007294.4(BRCA1):c.5140G>T (p.Val1714Phe)	Likely Pathogenic	1	2	Gene-specific
BRCA1	NM_007294.4(BRCA1):c.122A>T (p.His41Leu)	Likely Pathogenic	1	3	Gene-specific
BRCA1	NM_007294.4(BRCA1):c.5075A>T (p.Asp1692Val)	Likely Pathogenic	1	3	Gene-specific
BRCA1	NM_007294.4(BRCA1):c.5332G>A (p.Asp1778Asn)	Pathogenic	0	-2	Gene-specific
BRCA1	NM_007294.4(BRCA1):c.5339T>G (p.Leu1780Arg)	Likely Pathogenic	1	0	Gene-specific
BRCA1	NM_007294.4(BRCA1):c.5257A>G (p.Arg1753Gly)	Likely Pathogenic	1	3	Gene-specific
BRCA1	NM_007294.4(BRCA1):c.121C>A (p.His41Asn)	Likely Pathogenic	1	3	Gene-specific
BRCA1	NM_007294.4(BRCA1):c.74C>T (p.Pro25Leu)	Likely Pathogenic	1	3	Gene-specific
BRCA1	NM_007294.4(BRCA1):c.4159T>C (p.Ser1387Pro)	Likely Benign	0	-2	Gene-specific
BRCA1	NM_007294.4(BRCA1):c.5252G>C (p.Arg1751Pro)	Likely Pathogenic	1	0	Gene-specific
BRCA1	NM_007294.4(BRCA1):c.5561T>C (p.Leu1854Pro)	Likely Pathogenic	1	1	Gene-specific
BRCA1	NM_007294.4(BRCA1):c.5282T>G (p.Phe1761Cys)	Likely Pathogenic	1	3	Gene-specific
BRCA1	NM_007294.4(BRCA1):c.5236C>G (p.His1746Asp)	Likely Pathogenic	1	2	Gene-specific
BRCA1	NM_007294.4(BRCA1):c.5242G>T (p.Gly1748Cys)	Likely Pathogenic	1	1	Gene-specific
BRCA1	NM_007294.4(BRCA1):c.5003T>C (p.Phe1668Ser)	Uncertain Significance	0	2	Gene-specific
BRCA1	NM_007294.4(BRCA1):c.5056C>T (p.His1686Tyr)	Likely Pathogenic	1	3	Gene-specific
BRCA1	NM_007294.4(BRCA1):c.5096G>C (p.Arg1699Pro)	Uncertain Significance	1	3	Gene-specific
BRCA1	NM_007294.4(BRCA1):c.4963T>C (p.Ser1655Pro)	Likely Pathogenic	1	3	Gene-specific
BRCA1	NM_007294.4(BRCA1):c.5200T>A (p.Phe1734Ile)	Likely Pathogenic	0	3	Gene-specific
BRCA1	NM_007294.4(BRCA1):c.5098A>G (p.Thr1700Ala)	Likely Pathogenic	1	3	Gene-specific
BRCA2	NM_000059.4(BRCA2):c.831T>G (p.Asn277Lys)	Benign	0	-3	Gene-specific
BRCA2	NM_000059.4(BRCA2):c.9227G>T (p.Gly3076Val)	Pathogenic	1	3	Gene-specific
BRCA2	NM_000059.4(BRCA2):c.8023A>G (p.Ile2675Val)	Pathogenic	0	2	Gene-specific
BRCA2	NM_000059.4(BRCA2):c.663T>G (p.Phe221Leu)	Likely Benign	0	-2	Gene-specific
BRCA2	NM_000059.4(BRCA2):c.8149G>T (p.Ala2717Ser)	Benign	-1	0	Gene-specific
BRCA2	NM_000059.4(BRCA2):c.7796A>G (p.Glu2599Gly)	Likely Pathogenic	1	2	Gene-specific
BRCA2	NM_000059.4(BRCA2):c.2482T>C (p.Tyr828His)	Likely Benign	0	-1	Gene-specific
BRCA2	NM_000059.4(BRCA2):c.7759C>T (p.Leu2587Phe)	Benign	-1	1	Gene-specific
BRCA2	NM_000059.4(BRCA2):c.8059G>T (p.Val2687Phe)	Uncertain Significance	1	2	Gene-specific
BRCA2	NM_000059.4(BRCA2):c.9302T>C (p.Leu3101Pro)	Likely Pathogenic	1	2	Gene-specific
BRCA2	NM_000059.4(BRCA2):c.7970A>C (p.Lys2657Thr)	Uncertain Significance	0	2	Gene-specific
BRCA2	NM_000059.4(BRCA2):c.2471T>C (p.Leu824Ser)	Likely Benign	0	-2	Gene-specific
BRCA2	NM_000059.4(BRCA2):c.7787G>A (p.Gly2596Glu)	Likely Pathogenic	1	2	Gene-specific
BRCA2	NM_000059.4(BRCA2):c.8164A>G (p.Thr2722Ala)	Likely Pathogenic	1	2	Gene-specific
BRCA2	NM_000059.4(BRCA2):c.7857G>C (p.Trp2619Cys)	Likely Pathogenic	1	3	Gene-specific
BRCA2	NM_000059.4(BRCA2):c.8362T>C (p.Trp2788Arg)	Likely Pathogenic	1	3	Gene-specific
CDH23	NM_022124.6(CDH23):c.8083G>A (p.Asp2695Asn)	Uncertain Significance	1	2	Gene-specific
CDH23	NM_022124.6(CDH23):c.6614C>T (p.Pro2205Leu)	Uncertain Significance	0	-1	Gene-specific
CDH23	NM_022124.6(CDH23):c.478G>A (p.Asp160Asn)	Uncertain Significance	1	2	Gene-specific
CDH23	NM_022124.6(CDH23):c.4000C>T (p.Arg1334Trp)	Uncertain Significance	0	-1	Gene-specific
CDH23	NM_022124.5(CDH23):c.3625A>G (p.Thr1209Ala)	Benign	-1	-2	Gene-specific
CDH23	NM_022124.6(CDH23):c.902G>A (p.Arg301Gln)	Uncertain Significance	0	0	Gene-specific
CDH23	NM_022124.6(CDH23):c.2263C>T (p.His755Tyr)	Benign	0	-3	Gene-specific
CDH23	NM_022124.6(CDH23):c.6866A>G (p.Asn2289Ser)	Uncertain Significance	1	0	Gene-specific
CDH23	NM_022124.5(CDH23):c.719C>T (p.Pro240Leu)	Pathogenic	0	0	Gene-specific
DYSF	NM_001130987.2(DYSF):c.1906G>C (p.Gly636Arg)	Pathogenic	1	4	Gene-specific
DYSF	NM_001130987.2(DYSF):c.1906G>C (p.Gly636Arg)	Pathogenic	1	4	Gene-specific
DYSF	NM_001130987.2(DYSF):c.1906G>A (p.Gly636Arg)	Pathogenic	1	4	Gene-specific
DYSF	NM_001130987.2(DYSF):c.1906G>A (p.Gly636Arg)	Pathogenic	1	4	Gene-specific
DYSF	NM_001130987.2(DYSF):c.1216G>C (p.Val406Leu)	Benign	0	-4	Gene-specific
DYSF	NM_001130987.2(DYSF):c.1465G>A (p.Glu489Lys)	Benign	0	-3	Gene-specific
DYSF	NM_001130987.2(DYSF):c.2554A>G (p.Ile852Val)	Benign	-1	-4	Gene-specific
DYSF	NM_001130987.2(DYSF):c.3946A>G (p.Ile1316Val)	Benign	0	-3	Gene-specific
DYSF	NM_001130987.2(DYSF):c.953T>A (p.Val318Glu)	Pathogenic	1	4	Gene-specific
DYSF	NM_001130987.2(DYSF):c.4076T>C (p.Leu1359Pro)	Pathogenic	1	3	Gene-specific
DYSF	NM_001130987.2(DYSF):c.4046G>T (p.Arg1349Leu)	Benign	0	-3	Gene-specific
DYSF	NM_001130987.2(DYSF):c.4937T>C (p.Ile1646Thr)	Benign	0	-4	Gene-specific
DYSF	NM_001130987.2(DYSF):c.1931T>C (p.Met644Thr)	Likely Benign	0	-4	Gene-specific
DYSF	NM_001130987.2(DYSF):c.605C>A (p.Ala202Glu)	Benign	0	-4	Gene-specific
DYSF	NM_001130987.2(DYSF):c.1717C>T (p.Arg573Trp)	Pathogenic	1	4	Gene-specific
DYSF	NM_001130987.2(DYSF):c.3119G>A (p.Arg1040Gln)	Benign	0	-3	Gene-specific
DYSF	NM_001130987.2(DYSF):c.5176T>C (p.Ser1726Pro)	Likely Pathogenic	1	2	Gene-specific
DYSF	NM_001130987.2(DYSF):c.3167G>C (p.Arg1056Pro)	Pathogenic	1	3	Gene-specific
DYSF	NM_001130987.2(DYSF):c.386G>A (p.Gly129Glu)	Benign	0	-2	Gene-specific
DYSF	NM_001130987.2(DYSF):c.4057G>A (p.Glu1353Lys)	Pathogenic	1	3	Gene-specific
DYSF	NM_001130987.2(DYSF):c.4078C>T (p.Arg1360Trp)	Likely Pathogenic	1	2	Gene-specific
DYSF	NM_001130987.2(DYSF):c.3167G>A (p.Arg1056Gln)	Pathogenic	1	4	Gene-specific
DYSF	NM_001130987.2(DYSF):c.2844G>C (p.Trp948Cys)	Pathogenic	1	3	Gene-specific
DYSF	NM_001130987.2(DYSF):c.1915G>A (p.Gly639Arg)	Pathogenic	1	3	Gene-specific
DYSF	NM_001130987.2(DYSF):c.853C>T (p.Arg285Trp)	Pathogenic	0	0	Gene-specific
DYSF	NM_001130987.2(DYSF):c.209T>G (p.Val70Gly)	Pathogenic	1	2	Gene-specific
DYSF	NM_001130987.2(DYSF):c.991G>A (p.Gly331Arg)	Pathogenic	1	4	Gene-specific
DYSF	NM_003494.4(DYSF):c.17T>A (p.Ile6Asn)	Uncertain Significance	0	-1	Gene-specific
DYSF	NM_001130987.2(DYSF):c.5620A>G (p.Met1874Val)	Pathogenic	0	0	Gene-specific
DYSF	NM_001130987.2(DYSF):c.6155C>G (p.Pro2052Arg)	Likely Pathogenic	1	2	Gene-specific
DYSF	NM_001130987.2(DYSF):c.961T>C (p.Ser321Pro)	Likely Pathogenic	1	0	Gene-specific
DYSF	NM_001130987.2(DYSF):c.991G>C (p.Gly331Arg)	Pathogenic	1	4	Gene-specific
DYSF	NM_001130987.2(DYSF):c.5546G>A (p.Arg1849Lys)	Pathogenic	0	-3	Gene-specific
DYSF	NM_001130987.2(DYSF):c.4643T>G (p.Leu1548Arg)	Uncertain Significance	1	2	Gene-specific
DYSF	NM_001130987.2(DYSF):c.4556A>C (p.Lys1519Thr)	Likely Pathogenic	1	3	Gene-specific
DYSF	NM_001130987.2(DYSF):c.851C>T (p.Thr284Met)	Pathogenic	1	4	Gene-specific
DYSF	NM_001130987.2(DYSF):c.1609G>A (p.Gly537Arg)	Pathogenic	0	4	Gene-specific
DYSF	NM_001130987.2(DYSF):c.5626G>A (p.Asp1876Asn)	Pathogenic	1	2	Gene-specific
DYSF	NM_001130987.2(DYSF):c.3191G>A (p.Arg1064His)	Pathogenic	1	2	Gene-specific
DYSF	NM_001130987.2(DYSF):c.1439T>C (p.Leu480Pro)	Pathogenic	1	1	Gene-specific
DYSF	NM_001130987.2(DYSF):c.5194C>T (p.Arg1732Trp)	Pathogenic	1	1	Gene-specific
DYSF	NM_001130987.2(DYSF):c.6241C>T (p.Arg2081Cys)	Pathogenic	1	3	Gene-specific
DYSF	NM_001130987.2(DYSF):c.5413G>A (p.Glu1805Lys)	Pathogenic	1	3	Gene-specific
DYSF	NM_001130987.2(DYSF):c.1256G>C (p.Arg419Pro)	Uncertain Significance	1	3	Gene-specific
DYSF	NM_001130987.2(DYSF):c.991G>T (p.Gly331Trp)	Pathogenic	1	4	Gene-specific
DYSF	NM_001130987.2(DYSF):c.5419C>T (p.Arg1807Trp)	Pathogenic	1	0	Gene-specific
F8	NM_000132.3(F8):c.980T>C (p.Leu327Pro)	Likely Pathogenic	1	4	Gene-specific
F8	NM_000132.4(F8):c.5303G>A (p.Arg1768His)	Pathogenic	1	3	Gene-specific
F8	NM_000132.3(F8):c.2947G>A (p.Val983Ile)	Benign	-1	-4	Gene-specific
F8	NM_000132.3(F8):c.2215G>A (p.Glu739Lys)	Pathogenic	1	0	Gene-specific
F8	NM_000132.3(F8):c.1508G>A (p.Arg503His)	Benign	0	-2	Gene-specific
F8	NM_000132.4(F8):c.5186G>A (p.Gly1729Glu)	Likely Pathogenic	1	4	Gene-specific
F8	NM_000132.4(F8):c.2453C>T (p.Thr818Ile)	Benign	0	-3	Gene-specific
F8	NM_000132.3(F8):c.923C>T (p.Ser308Leu)	Pathogenic	1	3	Gene-specific
F8	NM_000132.3(F8):c.6769A>G (p.Met2257Val)	Benign	-1	-4	Gene-specific
F8	NM_000132.4(F8):c.6724G>A (p.Val2242Met)	Benign	0	0	Gene-specific
F8	NM_000132.4(F8):c.5815G>C (p.Ala1939Pro)	Uncertain Significance	1	4	Gene-specific
F8	NM_000132.4(F8):c.1834C>T (p.Arg612Cys)	Pathogenic	1	3	Gene-specific
F8	NM_000132.3(F8):c.1214T>G (p.Ile405Ser)	Likely Pathogenic	1	4	Gene-specific
F8	NM_000132.3(F8):c.5822A>G (p.Asn1941Ser)	Pathogenic	1	4	Gene-specific
F8	NM_000132.3(F8):c.1660A>G (p.Ser554Gly)	Pathogenic	1	4	Gene-specific
F8	NM_000132.4(F8):c.2961G>C (p.Glu987Asp)	Likely Benign	-1	-4	Gene-specific
F8	NM_000132.4(F8):c.4828G>T (p.Ala1610Ser)	Likely Benign	0	0	Gene-specific
F8	NM_000132.4(F8):c.3280G>A (p.Glu1094Lys)	Benign	0	-2	Gene-specific
F8	NM_000132.4(F8):c.2840C>G (p.Pro947Arg)	Likely Benign	0	0	Gene-specific
F8	NM_000132.4(F8):c.3169G>A (p.Glu1057Lys)	Benign	1	0	Gene-specific
F8	NM_000132.4(F8):c.5063C>T (p.Ser1688Leu)	Likely Benign	1	0	Gene-specific
F8	NM_000132.4(F8):c.7021G>A (p.Glu2341Lys)	Likely Pathogenic	1	4	Gene-specific
F8	NM_000132.4(F8):c.2212T>G (p.Tyr738Asp)	Benign	0	-3	Gene-specific
F8	NM_000132.4(F8):c.1468A>G (p.Arg490Gly)	Likely Pathogenic	1	4	Gene-specific
F8	NM_000132.4(F8):c.1030A>C (p.Lys344Gln)	Uncertain Significance	1	0	Gene-specific
F8	NM_000132.4(F8):c.6623A>G (p.Gln2208Arg)	Likely Pathogenic	1	2	Gene-specific
F8	NM_000132.4(F8):c.6658G>C (p.Ala2220Pro)	Pathogenic	1	1	Gene-specific
F9	NM_000133.3(F9):c.88G>A (p.Val30Ile)	Likely Pathogenic	1	0	Gene-specific
F9	NM_000133.3(F9):c.572G>A (p.Arg191His)	Pathogenic	1	0	Gene-specific
F9	NM_000133.3(F9):c.580A>G (p.Thr194Ala)	Benign	-1	-2	Gene-specific
F9	NM_000133.4(F9):c.1325G>A (p.Gly442Glu)	Likely Pathogenic	1	1	Gene-specific
F9	NM_000133.4(F9):c.520G>A (p.Val174Met)	Likely Pathogenic	1	0	Gene-specific
F9	NM_000133.4(F9):c.802T>A (p.Cys268Ser)	Likely Pathogenic	1	2	Gene-specific
F9	NM_000133.3(F9):c.316G>A (p.Gly106Ser)	Pathogenic	1	1	Gene-specific
F9	NM_000133.4(F9):c.407T>C (p.Ile136Thr)	Likely Pathogenic	1	0	Gene-specific
F9	NM_000133.3(F9):c.19A>T (p.Ile7Phe)	Benign	0	0	Gene-specific
F9	NM_000133.4(F9):c.8G>A (p.Arg3His)	Benign	0	0	Gene-specific
F9	NM_000133.3(F9):c.881G>A (p.Arg294Gln)	Pathogenic	0	0	Gene-specific
F9	NM_000133.3(F9):c.1009G>C (p.Ala337Pro)	Likely Pathogenic	1	0	Gene-specific
F9	NM_000133.4(F9):c.769G>A (p.Val257Ile)	Benign	0	-1	Gene-specific
F9	NM_000133.4(F9):c.1048T>G (p.Ser350Ala)	Benign	-1	-2	Gene-specific
F9	NM_000133.4(F9):c.130C>T (p.Pro44Ser)	Likely Benign	-1	-2	Gene-specific
F9	NM_000133.4(F9):c.1105C>T (p.Leu369Phe)	Uncertain Significance	1	1	Gene-specific
F9	NM_000133.4(F9):c.1106T>C (p.Leu369Pro)	Likely Pathogenic	1	1	Gene-specific
FBN1	NM_000138.5(FBN1):c.1147G>A (p.Glu383Lys)	Likely Pathogenic	1	0	Gene-specific
FBN1	NM_000138.5(FBN1):c.6491G>A (p.Cys2164Tyr)	Pathogenic	1	1	Gene-specific
FBN1	NM_000138.5(FBN1):c.6724C>T (p.Arg2242Cys)	Uncertain Significance	0	0	Gene-specific
FBN1	NM_000138.5(FBN1):c.7726C>T (p.Arg2576Cys)	Pathogenic	0	0	Gene-specific
FBN1	NM_000138.5(FBN1):c.7775G>T (p.Cys2592Phe)	Pathogenic	1	0	Gene-specific
FBN1	NM_000138.5(FBN1):c.7892G>A (p.Cys2631Tyr)	Pathogenic	1	2	Gene-specific
FBN1	NM_000138.5(FBN1):c.8002G>T (p.Gly2668Cys)	Likely Pathogenic	1	2	Gene-specific
FBN1	NM_000138.5(FBN1):c.8378A>G (p.Tyr2793Cys)	Likely Pathogenic	1	2	Gene-specific
FBN1	NM_000138.5(FBN1):c.5518C>T (p.Arg1840Cys)	Likely Pathogenic	1	0	Gene-specific
FBN1	NM_000138.5(FBN1):c.5747G>A (p.Cys1916Tyr)	Likely Pathogenic	1	2	Gene-specific
FBN1	NM_000138.5(FBN1):c.4330T>A (p.Cys1444Ser)	Pathogenic	1	2	Gene-specific
FBN1	NM_000138.5(FBN1):c.4330T>A (p.Cys1444Ser)	Pathogenic	1	2	Gene-specific
FBN1	NM_000138.5(FBN1):c.338C>G (p.Ser113Cys)	Likely Pathogenic	0	-4	Gene-specific
FBN1	NM_000138.5(FBN1):c.3290G>A (p.Cys1097Tyr)	Pathogenic	1	2	Gene-specific
FBN1	NM_000138.5(FBN1):c.2660G>A (p.Cys887Tyr)	Likely Pathogenic	1	2	Gene-specific
FBN1	NM_000138.5(FBN1):c.1481G>C (p.Cys494Ser)	Likely Pathogenic	1	3	Gene-specific
FBN1	NM_000138.5(FBN1):c.1453C>T (p.Arg485Cys)	Pathogenic	0	0	Gene-specific
FBN1	NM_000138.5(FBN1):c.79G>A (p.Ala27Thr)	Benign	-1	-4	Gene-specific
FBN1	NM_000138.5(FBN1):c.3677G>T (p.Gly1226Val)	Uncertain Significance	1	2	Gene-specific
FBN1	NM_000138.5(FBN1):c.3712G>A (p.Asp1238Asn)	Pathogenic	1	1	Gene-specific
FBN1	NM_000138.5(FBN1):c.7409G>T (p.Cys2470Phe)	Likely Pathogenic	1	2	Gene-specific
FBN1	NM_000138.5(FBN1):c.5743C>T (p.Arg1915Cys)	Pathogenic	0	-1	Gene-specific
FBN1	NM_000138.5(FBN1):c.3707G>A (p.Cys1236Tyr)	Pathogenic	1	2	Gene-specific
FBN1	NM_000138.5(FBN1):c.3409C>T (p.Arg1137Cys)	Uncertain Significance	0	0	Gene-specific
FBN1	NM_000138.5(FBN1):c.2287T>G (p.Cys763Gly)	Pathogenic	1	2	Gene-specific
FBN1	NM_000138.5(FBN1):c.2287T>C (p.Cys763Arg)	Likely Pathogenic	1	2	Gene-specific
FBN1	NM_000138.5(FBN1):c.188A>G (p.Tyr63Cys)	Uncertain Significance	0	0	Gene-specific
FBN1	NM_000138.5(FBN1):c.4414T>C (p.Cys1472Arg)	Pathogenic	1	2	Gene-specific
FBN1	NM_000138.5(FBN1):c.1630G>A (p.Gly544Arg)	Pathogenic	1	2	Gene-specific
FBN1	NM_000138.5(FBN1):c.6446A>G (p.Tyr2149Cys)	Pathogenic	1	2	Gene-specific
FBN1	NM_000138.5(FBN1):c.6032G>A (p.Cys2011Tyr)	Likely Pathogenic	1	2	Gene-specific
FBN1	NM_000138.5(FBN1):c.4526A>G (p.Tyr1509Cys)	Likely Pathogenic	1	2	Gene-specific
FBN1	NM_000138.5(FBN1):c.4405C>T (p.Arg1469Cys)	Uncertain Significance	1	0	Gene-specific
FBN1	NM_000138.5(FBN1):c.4081T>C (p.Cys1361Arg)	Likely Pathogenic	1	2	Gene-specific
FBN1	NM_000138.5(FBN1):c.1390C>T (p.Arg464Cys)	Likely Pathogenic	0	-1	Gene-specific
FBN1	NM_000138.5(FBN1):c.7540G>A (p.Gly2514Arg)	Pathogenic	0	2	Gene-specific
FBN1	NM_000138.5(FBN1):c.3428G>A (p.Gly1143Asp)	Uncertain Significance	1	0	Gene-specific
FBN1	NM_000138.5(FBN1):c.1634G>A (p.Arg545His)	Uncertain Significance	1	0	Gene-specific
FBN1	NM_000138.5(FBN1):c.6448C>T (p.Arg2150Cys)	Pathogenic	1	2	Gene-specific
FBN1	NM_000138.5(FBN1):c.6662G>A (p.Cys2221Tyr)	Pathogenic	1	2	Gene-specific
FBN1	NM_000138.5(FBN1):c.6820T>C (p.Cys2274Arg)	Likely Pathogenic	1	2	Gene-specific
FBN1	NM_000138.5(FBN1):c.7763A>G (p.Tyr2588Cys)	Uncertain Significance	1	2	Gene-specific
FBN1	NM_000138.5(FBN1):c.3476G>A (p.Cys1159Tyr)	Pathogenic	1	2	Gene-specific
FBN1	NM_000138.5(FBN1):c.6185A>G (p.Tyr2062Cys)	Uncertain Significance	0	-1	Gene-specific
FBN1	NM_000138.5(FBN1):c.911G>A (p.Cys304Tyr)	Likely Pathogenic	1	2	Gene-specific
FBN1	NM_000138.5(FBN1):c.5885A>G (p.Tyr1962Cys)	Likely Pathogenic	1	2	Gene-specific
FBN1	NM_000138.5(FBN1):c.4280A>G (p.Tyr1427Cys)	Likely Pathogenic	1	2	Gene-specific
FBN1	NM_000138.5(FBN1):c.3557A>G (p.Tyr1186Cys)	Pathogenic	1	2	Gene-specific
FBN1	NM_000138.5(FBN1):c.3457T>C (p.Cys1153Arg)	Likely Pathogenic	1	2	Gene-specific
FBN1	NM_000138.5(FBN1):c.1708T>C (p.Cys570Arg)	Pathogenic	1	2	Gene-specific
FBN1	NM_000138.5(FBN1):c.1556A>G (p.Tyr519Cys)	Pathogenic	1	2	Gene-specific
FBN1	NM_000138.5(FBN1):c.1030C>T (p.Arg344Cys)	Likely Pathogenic	1	1	Gene-specific
FBN1	NM_000138.5(FBN1):c.3554G>A (p.Gly1185Asp)	Likely Pathogenic	1	2	Gene-specific
FBN1	NM_000138.5(FBN1):c.3650G>A (p.Gly1217Asp)	Likely Pathogenic	1	1	Gene-specific
FBN1	NM_000138.5(FBN1):c.6410G>A (p.Cys2137Tyr)	Pathogenic	1	2	Gene-specific
FBN1	NM_000138.5(FBN1):c.6541T>C (p.Cys2181Arg)	Likely Pathogenic	1	3	Gene-specific
FBN1	NM_000138.5(FBN1):c.6866G>C (p.Cys2289Ser)	Likely Pathogenic	1	3	Gene-specific
FBN1	NM_000138.5(FBN1):c.6866G>C (p.Cys2289Ser)	Likely Pathogenic	1	3	Gene-specific
FBN1	NM_000138.5(FBN1):c.7016G>A (p.Cys2339Tyr)	Likely Pathogenic	1	2	Gene-specific
FBN1	NM_000138.5(FBN1):c.5558G>A (p.Cys1853Tyr)	Pathogenic	1	3	Gene-specific
FBN1	NM_000138.5(FBN1):c.5966G>T (p.Cys1989Phe)	Pathogenic	1	2	Gene-specific
FBN1	NM_000138.5(FBN1):c.4409G>A (p.Cys1470Tyr)	Pathogenic	1	2	Gene-specific
FBN1	NM_000138.5(FBN1):c.3508C>T (p.Arg1170Cys)	Uncertain Significance	0	0	Gene-specific
FBN1	NM_000138.5(FBN1):c.2624G>A (p.Cys875Tyr)	Likely Pathogenic	1	2	Gene-specific
FBN1	NM_000138.5(FBN1):c.199T>C (p.Cys67Arg)	Likely Pathogenic	1	1	Gene-specific
FBN1	NM_000138.5(FBN1):c.1825C>T (p.Arg609Cys)	Uncertain Significance	1	2	Gene-specific
FBN1	NM_000138.5(FBN1):c.1850G>A (p.Cys617Tyr)	Pathogenic	1	0	Gene-specific
FBN1	NM_000138.5(FBN1):c.1379G>A (p.Cys460Tyr)	Likely Pathogenic	1	2	Gene-specific
FBN1	NM_000138.5(FBN1):c.1538G>T (p.Cys513Phe)	Likely Pathogenic	1	3	Gene-specific
FBN1	NM_000138.5(FBN1):c.7577A>G (p.Asn2526Ser)	Likely Pathogenic	1	0	Gene-specific
FBN1	NM_000138.5(FBN1):c.3509G>A (p.Arg1170His)	Benign	0	-2	Gene-specific
FBN1	NM_000138.5(FBN1):c.5443G>A (p.Gly1815Ser)	Uncertain Significance	0	-1	Gene-specific
FBN1	NM_000138.4(FBN1):c.985A>G (p.Ile329Val)	Likely Benign	-1	-4	Gene-specific
FBN1	NM_000138.5(FBN1):c.3689T>C (p.Met1230Thr)	Likely Benign	0	-1	Gene-specific
FBN1	NM_000138.4(FBN1):c.629G>A (p.Cys210Tyr)	Likely Pathogenic	1	2	Gene-specific
FBN1	NM_000138.5(FBN1):c.4640C>T (p.Thr1547Ile)	Benign	0	-4	Gene-specific
FBN1	NM_000138.5(FBN1):c.4466A>G (p.Asn1489Ser)	Uncertain Significance	0	-2	Gene-specific
FBN1	NM_000138.4(FBN1):c.8363C>T (p.Thr2788Met)	Benign	0	-4	Gene-specific
FBN1	NM_000138.5(FBN1):c.7003C>T (p.Arg2335Trp)	Likely Pathogenic	1	0	Gene-specific
FBN1	NM_000138.4(FBN1):c.4459G>A (p.Asp1487Asn)	Pathogenic	1	0	Gene-specific
FBN1	NM_000138.5(FBN1):c.3058A>G (p.Thr1020Ala)	Likely Benign	0	-4	Gene-specific
FBN1	NM_000138.5(FBN1):c.3422C>T (p.Pro1141Leu)	Benign	0	0	Gene-specific
FOXG1	NM_005249.5(FOXG1):c.344C>T (p.Ala115Val)	Benign	-1	-4	Gene-specific
FOXG1	NM_005249.5(FOXG1):c.218A>C (p.Gln73Pro)	Benign	-1	-4	Gene-specific
FOXG1	NM_005249.5(FOXG1):c.251C>A (p.Pro84His)	Benign	-1	-4	Gene-specific
FOXG1	NM_005249.5(FOXG1):c.209A>C (p.Gln70Pro)	Benign	-1	-4	Gene-specific
FOXG1	NM_005249.5(FOXG1):c.1045T>G (p.Ser349Ala)	Likely Benign	0	-4	Gene-specific
FOXG1	NM_005249.5(FOXG1):c.227C>T (p.Pro76Leu)	Likely Benign	-1	-4	Gene-specific
FOXG1	NM_005249.5(FOXG1):c.565C>G (p.Leu189Val)	Likely Pathogenic	1	3	Gene-specific
FOXG1	NM_005249.5(FOXG1):c.620T>C (p.Ile207Thr)	Likely Pathogenic	1	4	Gene-specific
FOXG1	NM_005249.5(FOXG1):c.1273T>C (p.Ser425Pro)	Benign	0	-1	Gene-specific
FOXG1	NM_005249.5(FOXG1):c.221C>A (p.Pro74Gln)	Benign	-1	-4	Gene-specific
FOXG1	NM_005249.5(FOXG1):c.1384A>G (p.Ser462Gly)	Benign	0	-4	Gene-specific
FOXG1	NM_005249.5(FOXG1):c.455G>C (p.Gly152Ala)	Benign	-1	-4	Gene-specific
FOXG1	NM_005249.5(FOXG1):c.977G>A (p.Ser326Asn)	Likely Benign	0	-4	Gene-specific
FOXG1	NM_005249.5(FOXG1):c.382G>T (p.Gly128Cys)	Likely Benign	0	-4	Gene-specific
FOXG1	NM_005249.5(FOXG1):c.376G>A (p.Gly126Ser)	Benign	0	-4	Gene-specific
FOXG1	NM_005249.5(FOXG1):c.503G>T (p.Gly168Val)	Uncertain Significance	0	-4	Gene-specific
FOXG1	NM_005249.5(FOXG1):c.275C>T (p.Ala92Val)	Likely Benign	-1	-4	Gene-specific
FOXG1	NM_005249.5(FOXG1):c.245C>A (p.Pro82Gln)	Benign	-1	-4	Gene-specific
FOXG1	NM_005249.5(FOXG1):c.268G>T (p.Ala90Ser)	Benign	-1	-4	Gene-specific
FOXG1	NM_005249.5(FOXG1):c.953A>T (p.His318Leu)	Uncertain Significance	0	0	Gene-specific
FOXG1	NM_005249.5(FOXG1):c.263G>A (p.Arg88Gln)	Likely Benign	-1	-4	Gene-specific
FOXG1	NM_005249.5(FOXG1):c.681C>G (p.Asn227Lys)	Uncertain Significance	1	3	Gene-specific
FOXG1	NM_005249.5(FOXG1):c.256C>A (p.Gln86Lys)	Likely Benign	-1	-4	Gene-specific
FOXG1	NM_005249.5(FOXG1):c.685A>C (p.Ile229Leu)	Likely Pathogenic	1	3	Gene-specific
FOXG1	NM_005249.5(FOXG1):c.503G>C (p.Gly168Ala)	Benign	-1	-4	Gene-specific
FOXG1	NM_005249.5(FOXG1):c.573G>A (p.Met191Ile)	Likely Pathogenic	1	1	Gene-specific
FOXG1	NM_005249.5(FOXG1):c.706A>G (p.Asn236Asp)	Likely Pathogenic	1	3	Gene-specific
FOXG1	NM_005249.5(FOXG1):c.748G>A (p.Gly250Ser)	Likely Pathogenic	1	3	Gene-specific
FOXG1	NM_005249.5(FOXG1):c.670G>A (p.Gly224Ser)	Likely Pathogenic	1	1	Gene-specific
FOXG1	NM_005249.5(FOXG1):c.471G>T (p.Lys157Asn)	Likely Benign	-1	-4	Gene-specific
FOXG1	NM_005249.5(FOXG1):c.471G>T (p.Lys157Asn)	Likely Benign	-1	-4	Gene-specific
FOXG1	NM_005249.5(FOXG1):c.326C>T (p.Pro109Leu)	Likely Benign	-1	-4	Gene-specific
FOXG1	NM_005249.4(FOXG1):c.561C>A (p.Asn187Lys)	Pathogenic	0	0	Gene-specific
FOXG1	NM_005249.5(FOXG1):c.131A>C (p.His44Pro)	Likely Benign	-1	-4	Gene-specific
FOXG1	NM_005249.5(FOXG1):c.310C>T (p.Leu104Phe)	Uncertain Significance	-1	-4	Gene-specific
MECP2	NM_001110792.2(MECP2):c.686C>T (p.Pro229Leu)	Likely Pathogenic	0	0	Gene-specific
MECP2	NM_001110792.2(MECP2):c.1177C>T (p.Pro393Ser)	Likely Benign	0	-1	Gene-specific
MECP2	NM_001110792.2(MECP2):c.860T>C (p.Val287Ala)	Benign	0	0	Gene-specific
MECP2	NM_001110792.2(MECP2):c.1250C>T (p.Pro417Leu)	Benign	0	-1	Gene-specific
MECP2	NM_001110792.2(MECP2):c.488A>G (p.Asp163Gly)	Likely Pathogenic	1	3	Gene-specific
MECP2	NM_001110792.2(MECP2):c.1120C>T (p.Pro374Ser)	Likely Benign	0	-1	Gene-specific
MECP2	NM_001110792.2(MECP2):c.784C>T (p.Arg262Cys)	Likely Benign	0	0	Gene-specific
MECP2	NM_001110792.2(MECP2):c.379C>T (p.Arg127Cys)	Uncertain Significance	1	3	Gene-specific
MECP2	NM_001110792.2(MECP2):c.1168G>T (p.Ala390Ser)	Likely Benign	0	0	Gene-specific
MECP2	NM_001110792.2(MECP2):c.1273T>C (p.Cys425Arg)	Uncertain Significance	0	-1	Gene-specific
MECP2	NM_001110792.2(MECP2):c.1042C>G (p.Leu348Val)	Benign	0	-1	Gene-specific
MECP2	NM_001110792.2(MECP2):c.553C>A (p.Pro185Thr)	Uncertain Significance	0	0	Gene-specific
MECP2	NM_001110792.2(MECP2):c.1189C>T (p.Pro397Ser)	Likely Benign	0	-1	Gene-specific
MECP2	NM_001110792.2(MECP2):c.105C>G (p.Asp35Glu)	Likely Benign	0	-1	Gene-specific
MECP2	NM_001110792.2(MECP2):c.1156G>C (p.Glu386Gln)	Likely Benign	0	-1	Gene-specific
MECP2	NM_001110792.2(MECP2):c.491C>G (p.Pro164Arg)	Pathogenic	1	3	Gene-specific
MECP2	NM_001110792.2(MECP2):c.968C>T (p.Thr323Met)	Benign	1	1	Gene-specific
MECP2	NM_001110792.2(MECP2):c.1455G>C (p.Glu485Asp)	Benign	0	-1	Gene-specific
MECP2	NM_001110792.2(MECP2):c.1150C>T (p.His384Tyr)	Likely Benign	0	-1	Gene-specific
MECP2	NM_001110792.2(MECP2):c.1183C>T (p.Leu395Phe)	Likely Benign	0	-1	Gene-specific
MECP2	NM_001110792.2(MECP2):c.1018C>G (p.Leu340Val)	Likely Benign	0	-1	Gene-specific
MECP2	NM_001110792.2(MECP2):c.1244C>G (p.Pro415Arg)	Likely Benign	0	-1	Gene-specific
MECP2	NM_001110792.2(MECP2):c.301C>T (p.Arg101Cys)	Benign	0	0	Gene-specific
MECP2	NM_001110792.2(MECP2):c.1448G>C (p.Arg483Thr)	Uncertain Significance	0	-1	Gene-specific
MECP2	NM_001110792.2(MECP2):c.1117C>T (p.Pro373Ser)	Likely Benign	0	-1	Gene-specific
MECP2	NM_001110792.2(MECP2):c.877G>A (p.Ala293Thr)	Benign	0	-1	Gene-specific
MECP2	NM_001110792.2(MECP2):c.1168G>A (p.Ala390Thr)	Likely Benign	0	-1	Gene-specific
MECP2	NM_001110792.2(MECP2):c.1240C>A (p.Pro414Thr)	Benign	0	-1	Gene-specific
MECP2	NM_001110792.2(MECP2):c.1207C>G (p.Pro403Ala)	Likely Benign	0	-1	Gene-specific
MECP2	NM_001110792.2(MECP2):c.937C>G (p.Leu313Val)	Uncertain Significance	0	-1	Gene-specific
MECP2	NM_001110792.2(MECP2):c.1214C>T (p.Pro405Leu)	Likely Benign	0	-1	Gene-specific
MECP2	NM_001110792.2(MECP2):c.1466G>C (p.Ser489Thr)	Likely Benign	0	-1	Gene-specific
MECP2	NM_001110792.2(MECP2):c.55G>A (p.Glu19Lys)	Benign	0	-1	Gene-specific
MECP2	NM_001110792.2(MECP2):c.1171C>T (p.Pro391Ser)	Benign	0	-1	Gene-specific
MECP2	NM_001110792.2(MECP2):c.785G>A (p.Arg262His)	Likely Benign	0	0	Gene-specific
MECP2	NM_001110792.2(MECP2):c.872C>T (p.Ala291Val)	Likely Pathogenic	0	-1	Gene-specific
MECP2	NM_001110792.2(MECP2):c.1345C>A (p.Gln449Lys)	Likely Benign	0	-1	Gene-specific
MECP2	NM_001110792.2(MECP2):c.1351G>T (p.Ala451Ser)	Benign	0	-1	Gene-specific
MECP2	NM_001110792.2(MECP2):c.1255G>A (p.Asp419Asn)	Likely Benign	0	-1	Gene-specific
MECP2	NM_001110792.2(MECP2):c.1096C>T (p.Arg366Cys)	Benign	0	0	Gene-specific
MECP2	NM_001110792.2(MECP2):c.408G>C (p.Leu136Phe)	Pathogenic	0	0	Gene-specific
MECP2	NM_001110792.2(MECP2):c.1291C>T (p.Pro431Ser)	Benign	0	-1	Gene-specific
MECP2	NM_001110792.2(MECP2):c.1199C>T (p.Pro400Leu)	Benign	0	-1	Gene-specific
MECP2	NM_001110792.2(MECP2):c.631C>T (p.Pro211Ser)	Benign	0	-1	Gene-specific
MECP2	NM_001110792.2(MECP2):c.338C>G (p.Pro113Arg)	Pathogenic	1	3	Gene-specific
MECP2	NM_001110792.2(MECP2):c.553C>G (p.Pro185Ala)	Likely Benign	0	-1	Gene-specific
MECP2	NM_001110792.2(MECP2):c.1001C>T (p.Pro334Leu)	Pathogenic	0	0	Gene-specific
MECP2	NM_001110792.2(MECP2):c.433C>T (p.Arg145Cys)	Pathogenic	1	3	Gene-specific
MECP2	NM_001110792.2(MECP2):c.1477G>A (p.Val493Met)	Likely Benign	0	-1	Gene-specific
MECP2	NM_001110792.2(MECP2):c.941C>T (p.Pro314Leu)	Pathogenic	1	3	Gene-specific
MECP2	NM_001110792.2(MECP2):c.334C>G (p.Leu112Val)	Pathogenic	1	2	Gene-specific
MECP2	NM_001110792.2(MECP2):c.1162C>T (p.Pro388Ser)	Benign	0	-1	Gene-specific
MECP2	NM_001110792.2(MECP2):c.439A>G (p.Lys147Glu)	Pathogenic	1	3	Gene-specific
MECP2	NM_001110792.2(MECP2):c.416C>T (p.Pro139Leu)	Pathogenic	1	3	Gene-specific
MECP2	NM_001110792.2(MECP2):c.400G>A (p.Val134Met)	Pathogenic	1	3	Gene-specific
MECP2	NM_001110792.2(MECP2):c.1364C>T (p.Ala455Val)	Likely Benign	0	-1	Gene-specific
MECP2	NM_001110792.2(MECP2):c.289C>T (p.Arg97Cys)	Uncertain Significance	0	0	Gene-specific
MECP2	NM_001110792.2(MECP2):c.737C>G (p.Ala246Gly)	Benign	0	-1	Gene-specific
MECP2	NM_001110792.2(MECP2):c.1231C>T (p.Pro411Ser)	Likely Benign	0	-1	Gene-specific
MECP2	NM_001110792.2(MECP2):c.507C>G (p.Phe169Leu)	Pathogenic	1	3	Gene-specific
MECP2	NM_001110792.2(MECP2):c.653G>C (p.Gly218Ala)	Benign	0	0	Gene-specific
MECP2	NM_001110792.2(MECP2):c.1363G>A (p.Ala455Thr)	Benign	0	-1	Gene-specific
MECP2	NM_001110792.2(MECP2):c.1241C>T (p.Pro414Leu)	Benign	0	-1	Gene-specific
MECP2	NM_001110792.2(MECP2):c.1196C>T (p.Pro399Leu)	Benign	0	-1	Gene-specific
MECP2	NM_001110792.2(MECP2):c.1174G>A (p.Val392Met)	Benign	0	-1	Gene-specific
MECP2	NM_001110792.2(MECP2):c.563C>A (p.Pro188His)	Likely Benign	0	-1	Gene-specific
MECP2	NM_001110792.2(MECP2):c.946A>G (p.Lys316Glu)	Likely Pathogenic	1	2	Gene-specific
MECP2	NM_001110792.2(MECP2):c.715C>G (p.Gln239Glu)	Uncertain Significance	0	-1	Gene-specific
MECP2	NM_001110792.2(MECP2):c.1469G>A (p.Arg490Gln)	Likely Benign	0	0	Gene-specific
MECP2	NM_001110792.2(MECP2):c.1225G>A (p.Glu409Lys)	Benign	0	-1	Gene-specific
MECP2	NM_001110792.2(MECP2):c.1318G>A (p.Gly440Ser)	Benign	0	-1	Gene-specific
MECP2	NM_001110792.2(MECP2):c.1198C>T (p.Pro400Ser)	Benign	0	-1	Gene-specific
MECP2	NM_001110792.2(MECP2):c.915C>G (p.Ile305Met)	Benign	0	-1	Gene-specific
MECP2	NM_001110792.2(MECP2):c.508A>G (p.Thr170Ala)	Pathogenic	1	3	Gene-specific
MECP2	NM_001110792.2(MECP2):c.434G>A (p.Arg145His)	Pathogenic	1	3	Gene-specific
MECP2	NM_001110792.2(MECP2):c.551C>T (p.Pro184Leu)	Benign	0	-1	Gene-specific
MECP2	NM_001110792.2(MECP2):c.569C>G (p.Ser190Cys)	Likely Benign	0	-1	Gene-specific
MECP2	NM_001110792.2(MECP2):c.1244C>T (p.Pro415Leu)	Likely Benign	0	-1	Gene-specific
MECP2	NM_001110792.2(MECP2):c.1187C>T (p.Pro396Leu)	Likely Benign	0	-1	Gene-specific
MECP2	NM_001110792.2(MECP2):c.727G>A (p.Gly243Arg)	Likely Benign	0	-1	Gene-specific
MECP2	NM_001110792.2(MECP2):c.408G>T (p.Leu136Phe)	Pathogenic	0	0	Gene-specific
MECP2	NM_001110792.2(MECP2):c.434G>T (p.Arg145Leu)	Pathogenic	1	3	Gene-specific
MECP2	NM_001110792.2(MECP2):c.191A>G (p.His64Arg)	Benign	0	-1	Gene-specific
MECP2	NM_001110792.2(MECP2):c.260C>T (p.Pro87Leu)	Benign	0	0	Gene-specific
MECP2	NM_001110792.2(MECP2):c.961C>T (p.Arg321Trp)	Pathogenic	0	0	Gene-specific
MECP2	NM_001110792.2(MECP2):c.638C>T (p.Ala213Val)	Benign	0	-1	Gene-specific
MECP2	NM_001110792.2(MECP2):c.1169C>T (p.Ala390Val)	Benign	0	-1	Gene-specific
MECP2	NM_001110792.2(MECP2):c.1375G>A (p.Ala459Thr)	Benign	0	-1	Gene-specific
MECP2	NM_001110792.2(MECP2):c.895G>C (p.Ala299Pro)	Likely Benign	0	0	Gene-specific
MECP2	NM_001110792.2(MECP2):c.437C>T (p.Ser146Phe)	Pathogenic	1	3	Gene-specific
MECP2	NM_001110792.2(MECP2):c.251C>T (p.Pro84Leu)	Likely Benign	0	-1	Gene-specific
MECP2	NM_001110792.2(MECP2):c.503A>G (p.Asp168Gly)	Pathogenic	1	3	Gene-specific
MECP2	NM_001110792.2(MECP2):c.1028A>G (p.Lys343Arg)	Uncertain Significance	0	-1	Gene-specific
MECP2	NM_001110792.2(MECP2):c.1097G>T (p.Arg366Leu)	Benign	0	-1	Gene-specific
MECP2	NM_001110792.2(MECP2):c.641C>G (p.Ala214Gly)	Likely Benign	0	-1	Gene-specific
MECP2	NM_001110792.2(MECP2):c.673C>G (p.Leu225Val)	Benign	0	-1	Gene-specific
MECP2	NM_001110792.2(MECP2):c.554C>G (p.Pro185Arg)	Likely Benign	1	0	Gene-specific
MECP2	NM_001110792.2(MECP2):c.1117C>G (p.Pro373Ala)	Benign	0	-1	Gene-specific
MECP2	NM_001110792.2(MECP2):c.189C>G (p.His63Gln)	Uncertain Significance	0	-1	Gene-specific
MECP2	NM_001110792.2(MECP2):c.947A>G (p.Lys316Arg)	Pathogenic	1	2	Gene-specific
MECP2	NM_001110792.2(MECP2):c.1289T>C (p.Met430Thr)	Benign	0	-1	Gene-specific
MSH2	NM_000251.3(MSH2):c.2075G>T (p.Gly692Val)	Pathogenic	2	2	Gene-specific
MSH2	NM_000251.3(MSH2):c.913G>A (p.Ala305Thr)	Likely Benign	2	1	Gene-specific
MSH2	NM_000251.3(MSH2):c.1012G>A (p.Gly338Arg)	Pathogenic	2	3	Gene-specific
MSH2	NM_000251.3(MSH2):c.1012G>A (p.Gly338Arg)	Pathogenic	2	3	Gene-specific
MSH2	NM_000251.3(MSH2):c.211G>C (p.Gly71Arg)	Pathogenic	0	-1	Gene-specific
MSH2	NM_000251.3(MSH2):c.929T>G (p.Leu310Arg)	Pathogenic	2	3	Gene-specific
MSH2	NM_000251.3(MSH2):c.1276G>A (p.Gly426Arg)	Pathogenic	0	-1	Gene-specific
MSH2	NM_000251.3(MSH2):c.1748A>G (p.Asn583Ser)	Likely Benign	-1	-4	Gene-specific
MSH6	NM_000179.3(MSH6):c.884A>G (p.Lys295Arg)	Uncertain Significance	0	-3	Gene-specific
MSH6	NM_000179.3(MSH6):c.107C>T (p.Ala36Val)	Likely Benign	-1	-4	Gene-specific
MSH6	NM_000179.3(MSH6):c.1296T>G (p.Phe432Leu)	Likely Pathogenic	1	2	Gene-specific
MSH6	NM_000179.3(MSH6):c.1296T>G (p.Phe432Leu)	Likely Pathogenic	1	3	Gene-specific
MSH6	NM_000179.3(MSH6):c.1282A>G (p.Lys428Glu)	Likely Pathogenic	1	2	Gene-specific
MTOR	NM_004958.3(MTOR):c.5930C>A (p.Thr1977Lys)	Pathogenic	0	1	Gene-specific
MTOR	NM_004958.4(MTOR):c.4448G>A (p.Cys1483Tyr)	Pathogenic	0	2	Gene-specific
MTOR	NM_004958.4(MTOR):c.6644C>A (p.Ser2215Tyr)	Pathogenic	0	1	Gene-specific
MTOR	NM_004958.4(MTOR):c.4379T>C (p.Leu1460Pro)	Pathogenic	0	1	Gene-specific
MTOR	NM_004958.3(MTOR):c.4447T>C (p.Cys1483Arg)	Pathogenic	0	1	Gene-specific
MTOR	NM_004958.3(MTOR):c.6644C>T (p.Ser2215Phe)	Pathogenic	0	1	Gene-specific
MTOR	NM_004958.4(MTOR):c.7280T>C (p.Leu2427Pro)	Pathogenic	0	2	Gene-specific
MTOR	NM_004958.4(MTOR):c.5978A>G (p.Lys1993Arg)	Uncertain Significance	0	-3	Gene-specific
MTOR	NM_004958.4(MTOR):c.1249A>G (p.Met417Val)	Uncertain Significance	0	-1	Gene-specific
MTOR	NM_004958.4(MTOR):c.5005G>T (p.Ala1669Ser)	Likely Pathogenic	0	-1	Gene-specific
MTOR	NM_004958.4(MTOR):c.4468T>C (p.Trp1490Arg)	Likely Pathogenic	0	1	Gene-specific
MTOR	NM_004958.4(MTOR):c.6752G>A (p.Arg2251Gln)	Uncertain Significance	0	0	Gene-specific
MYO7A	NM_000260.4(MYO7A):c.1183C>T (p.Arg395Cys)	Likely Pathogenic	1	0	Gene-specific
MYO7A	NM_000260.4(MYO7A):c.19G>A (p.Gly7Arg)	Uncertain Significance	1	3	Gene-specific
MYO7A	NM_000260.4(MYO7A):c.19G>A (p.Gly7Arg)	Uncertain Significance	1	3	Gene-specific
MYO7A	NM_000260.4(MYO7A):c.977T>A (p.Leu326Gln)	Likely Pathogenic	1	4	Gene-specific
MYO7A	NM_000260.4(MYO7A):c.5804T>C (p.Leu1935Pro)	Likely Pathogenic	1	4	Gene-specific
MYO7A	NM_000260.4(MYO7A):c.1849T>C (p.Ser617Pro)	Likely Pathogenic	1	3	Gene-specific
MYO7A	NM_000260.4(MYO7A):c.1817G>A (p.Arg606His)	Uncertain Significance	1	0	Gene-specific
MYO7A	NM_000260.4(MYO7A):c.3491G>A (p.Arg1164Gln)	Uncertain Significance	1	3	Gene-specific
MYO7A	NM_000260.4(MYO7A):c.4115T>G (p.Val1372Gly)	Likely Pathogenic	1	1	Gene-specific
MYO7A	NM_000260.4(MYO7A):c.3546C>A (p.Asn1182Lys)	Likely Pathogenic	1	0	Gene-specific
MYO7A	NM_000260.4(MYO7A):c.3827C>T (p.Ser1276Leu)	Uncertain Significance	1	0	Gene-specific
MYO7A	NM_000260.4(MYO7A):c.2904G>T (p.Glu968Asp)	Likely Pathogenic	0	-4	Gene-specific
MYO7A	NM_000260.4(MYO7A):c.3862G>C (p.Ala1288Pro)	Likely Pathogenic	1	0	Gene-specific
MYO7A	NM_000260.3(MYO7A):c.1007G>A (p.Arg336His)	Likely Benign	0	0	Gene-specific
MYO7A	NM_000260.4(MYO7A):c.3527G>A (p.Ser1176Asn)	Uncertain Significance	0	-3	Gene-specific
MYO7A	NM_000260.4(MYO7A):c.5618G>A (p.Arg1873Gln)	Pathogenic	1	3	Gene-specific
MYO7A	NM_000260.3(MYO7A):c.905G>A (p.Arg302His)	Likely Benign	0	-1	Gene-specific
MYO7A	NM_000260.4(MYO7A):c.1208A>G (p.Tyr403Cys)	Likely Pathogenic	1	4	Gene-specific
MYO7A	NM_000260.4(MYO7A):c.2558G>A (p.Arg853His)	Likely Pathogenic	1	0	Gene-specific
MYO7A	NM_000260.4(MYO7A):c.397C>A (p.His133Asn)	Likely Pathogenic	1	3	Gene-specific
MYO7A	NM_000260.4(MYO7A):c.983T>C (p.Leu328Pro)	Uncertain Significance	1	2	Gene-specific
MYO7A	NM_000260.3(MYO7A):c.3503G>A (p.Arg1168Gln)	Pathogenic	1	4	Gene-specific
MYO7A	NM_000260.4(MYO7A):c.1997G>A (p.Arg666Gln)	Uncertain Significance	1	1	Gene-specific
OTOF	NM_194248.3(OTOF):c.5374C>T (p.Arg1792Cys)	Likely Pathogenic	1	4	Gene-specific
OTOF	NM_194248.3(OTOF):c.4091G>T (p.Gly1364Val)	Likely Benign	0	0	Gene-specific
OTOF	NM_194248.3(OTOF):c.5405C>T (p.Ala1802Val)	Uncertain Significance	1	2	Gene-specific
OTOF	NM_194248.3(OTOF):c.4463A>T (p.Asp1488Val)	Uncertain Significance	1	4	Gene-specific
OTOF	NM_194248.3(OTOF):c.1723G>A (p.Val575Met)	Benign	0	-2	Gene-specific
OTOF	NM_194248.3(OTOF):c.4582G>A (p.Asp1528Asn)	Likely Benign	0	0	Gene-specific
POLG	NM_002693.2(POLG):c.3239G>C (p.Ser1080Thr)	Uncertain Significance	0	-2	Gene-specific
POLG	NM_002693.2(POLG):c.3572A>G (p.Lys1191Arg)	Uncertain Significance	1	1	Gene-specific
POLG	NM_002693.2(POLG):c.1636C>T (p.Arg546Cys)	Benign	0	-2	Gene-specific
POLG	NM_002693.2(POLG):c.1984G>A (p.Glu662Lys)	Benign	0	-4	Gene-specific
POLG	NM_002693.2(POLG):c.3293A>C (p.Asn1098Thr)	Uncertain Significance	1	2	Gene-specific
POLG	NM_002693.2(POLG):c.3573G>T (p.Lys1191Asn)	Likely Pathogenic	1	1	Gene-specific
SCN2A	NM_001040142.2(SCN2A):c.1571G>A (p.Arg524Gln)	Benign	-1	-4	Gene-specific
SCN2A	NM_001040142.2(SCN2A):c.3007C>A (p.Leu1003Ile)	Uncertain Significance	0	0	Gene-specific
SCN2A	NM_001040142.2(SCN2A):c.5636T>C (p.Met1879Thr)	Likely Pathogenic	2	4	Gene-specific
SCN2A	NM_001040142.2(SCN2A):c.56G>A (p.Arg19Lys)	Benign	0	-4	Gene-specific
SCN2A	NM_001040142.2(SCN2A):c.2723A>G (p.Lys908Arg)	Benign	0	-4	Gene-specific
SCN2A	NM_001040142.2(SCN2A):c.3043G>A (p.Asp1015Asn)	Likely Benign	-1	-4	Gene-specific
SCN2A	NM_001040142.2(SCN2A):c.5317G>A (p.Ala1773Thr)	Pathogenic	0	4	Gene-specific
SCN2A	NM_001040142.2(SCN2A):c.1108T>C (p.Phe370Leu)	Uncertain Significance	2	4	Gene-specific
SCN2A	NM_001040142.2(SCN2A):c.1094C>T (p.Thr365Met)	Likely Pathogenic	2	4	Gene-specific
SCN2A	NM_001040142.2(SCN2A):c.1399G>A (p.Ala467Thr)	Benign	-1	-4	Gene-specific
SCN2A	NM_001040142.2(SCN2A):c.2657T>C (p.Leu886Ser)	Likely Pathogenic	2	4	Gene-specific
SLC6A8	NM_005629.4(SLC6A8):c.1396G>A (p.Gly466Arg)	Likely Pathogenic	1	4	Gene-specific
SLC6A8	NM_005629.4(SLC6A8):c.1661C>T (p.Pro554Leu)	Pathogenic	1	3	Gene-specific
SLC6A8	NM_005629.4(SLC6A8):c.92C>T (p.Pro31Leu)	Uncertain Significance	-1	-4	Gene-specific
SLC6A8	NM_005629.4(SLC6A8):c.874T>C (p.Tyr292His)	Uncertain Significance	1	3	Gene-specific
SLC6A8	NM_005629.4(SLC6A8):c.395G>T (p.Gly132Val)	Likely Pathogenic	1	3	Gene-specific
SLC6A8	NM_005629.4(SLC6A8):c.370T>C (p.Trp124Arg)	Uncertain Significance	1	3	Gene-specific
SLC6A8	NM_005629.4(SLC6A8):c.1430C>T (p.Ser477Leu)	Uncertain Significance	1	2	Gene-specific
SLC6A8	NM_005629.4(SLC6A8):c.1162G>A (p.Ala388Thr)	Benign	0	2	Gene-specific
SLC6A8	NM_005629.4(SLC6A8):c.1631C>T (p.Pro544Leu)	Likely Pathogenic	1	1	Gene-specific
SLC6A8	NM_005629.4(SLC6A8):c.76G>A (p.Gly26Arg)	Uncertain Significance	-1	-4	Gene-specific
SLC6A8	NM_005629.4(SLC6A8):c.76G>A (p.Gly26Arg)	Uncertain Significance	-1	-4	Gene-specific
SLC6A8	NM_005629.4(SLC6A8):c.340C>A (p.Gln114Lys)	Uncertain Significance	1	3	Gene-specific
SLC6A8	NM_005629.4(SLC6A8):c.1285C>G (p.Leu429Val)	Likely Benign	-1	-4	Gene-specific
SLC6A8	NM_005629.4(SLC6A8):c.1141G>C (p.Gly381Arg)	Pathogenic	1	3	Gene-specific
SLC6A8	NM_005629.4(SLC6A8):c.11A>G (p.Lys4Arg)	Uncertain Significance	-1	-4	Gene-specific
SLC6A8	NM_005629.4(SLC6A8):c.912G>C (p.Gln304His)	Uncertain Significance	1	1	Gene-specific
SLC6A8	NM_005629.4(SLC6A8):c.259G>A (p.Gly87Arg)	Uncertain Significance	1	4	Gene-specific
SLC6A8	NM_005629.4(SLC6A8):c.1262G>A (p.Gly421Asp)	Uncertain Significance	0	0	Gene-specific
SLC6A8	NM_005629.4(SLC6A8):c.54G>C (p.Lys18Asn)	Uncertain Significance	-1	-4	Gene-specific
SLC6A8	NM_005629.4(SLC6A8):c.342G>C (p.Gln114His)	Likely Pathogenic	1	2	Gene-specific
SLC6A8	NM_005629.4(SLC6A8):c.1145C>T (p.Pro382Leu)	Likely Pathogenic	1	3	Gene-specific
SLC6A8	NM_005629.4(SLC6A8):c.617G>A (p.Arg206His)	Uncertain Significance	-1	-4	Gene-specific
SLC6A8	NM_005629.4(SLC6A8):c.1473C>G (p.Cys491Trp)	Likely Pathogenic	1	1	Gene-specific
SLC6A8	NM_005629.4(SLC6A8):c.56A>C (p.Lys19Thr)	Uncertain Significance	-1	-4	Gene-specific
SLC6A8	NM_005629.4(SLC6A8):c.145G>C (p.Val49Leu)	Uncertain Significance	-1	-4	Gene-specific
SLC6A8	NM_005629.4(SLC6A8):c.544G>A (p.Val182Met)	Benign	-1	-4	Gene-specific
SLC6A8	NM_005629.4(SLC6A8):c.1861C>T (p.Pro621Ser)	Likely Benign	-1	-4	Gene-specific
SLC6A8	NM_005629.4(SLC6A8):c.70G>C (p.Ala24Pro)	Uncertain Significance	-1	-4	Gene-specific
SLC6A8	NM_005629.4(SLC6A8):c.1879A>C (p.Lys627Gln)	Likely Benign	0	-2	Gene-specific
SLC6A8	NM_005629.4(SLC6A8):c.1778A>G (p.His593Arg)	Benign	-1	-4	Gene-specific
SLC6A8	NM_005629.4(SLC6A8):c.1810T>A (p.Leu604Met)	Likely Benign	-1	-4	Gene-specific
SLC6A8	NM_005629.4(SLC6A8):c.1570T>A (p.Ser524Thr)	Likely Benign	-1	-4	Gene-specific
SLC6A8	NM_005629.4(SLC6A8):c.619C>T (p.Arg207Trp)	Likely Pathogenic	0	0	Gene-specific
SLC6A8	NM_005629.4(SLC6A8):c.1646A>C (p.Asn549Thr)	Likely Benign	-1	-4	Gene-specific
SLC6A8	NM_005629.4(SLC6A8):c.26G>T (p.Gly9Val)	Likely Benign	-1	-4	Gene-specific
SLC6A8	NM_005629.4(SLC6A8):c.1714G>A (p.Val572Met)	Likely Benign	0	0	Gene-specific
SLC6A8	NM_005629.4(SLC6A8):c.1025T>C (p.Ile342Thr)	Likely Benign	0	0	Gene-specific
SLC6A8	NM_005629.4(SLC6A8):c.1169C>T (p.Pro390Leu)	Pathogenic	1	3	Gene-specific
SLC6A8	NM_005629.4(SLC6A8):c.48C>A (p.Asp16Glu)	Uncertain Significance	-1	-4	Gene-specific
SLC6A8	NM_005629.4(SLC6A8):c.116G>A (p.Gly39Asp)	Uncertain Significance	-1	-4	Gene-specific
SLC6A8	NM_005629.4(SLC6A8):c.557G>A (p.Arg186His)	Likely Benign	-1	-4	Gene-specific
SLC6A8	NM_005629.4(SLC6A8):c.1601T>C (p.Ile534Thr)	Likely Benign	0	-1	Gene-specific
SLC6A8	NM_005629.4(SLC6A8):c.1525T>C (p.Cys509Arg)	Likely Benign	0	-2	Gene-specific
SLC6A8	NM_005629.4(SLC6A8):c.1703C>A (p.Ser568Tyr)	Uncertain Significance	1	3	Gene-specific
SLC6A8	NM_005629.4(SLC6A8):c.89C>T (p.Ala30Val)	Uncertain Significance	-1	-4	Gene-specific
SLC6A8	NM_005629.4(SLC6A8):c.1048G>A (p.Gly350Arg)	Uncertain Significance	1	2	Gene-specific
SLC6A8	NM_005629.4(SLC6A8):c.1319G>A (p.Arg440His)	Likely Benign	0	-1	Gene-specific
SLC6A8	NM_005629.4(SLC6A8):c.1483G>A (p.Ala495Thr)	Likely Benign	0	0	Gene-specific
SOS1	NM_005633.3(SOS1):c.1655G>C (p.Arg552Thr)	Pathogenic	1	3	Gene-specific
SOS1	NM_005633.3(SOS1):c.1276C>A (p.Gln426Lys)	Likely Pathogenic	1	1	Gene-specific
SOS1	NM_005633.3(SOS1):c.1490G>A (p.Arg497Gln)	Likely Benign	0	1	Gene-specific
SOS1	NM_005633.3(SOS1):c.3600C>G (p.Asp1200Glu)	Likely Benign	-1	-1	Gene-specific
SOS1	NM_005633.3(SOS1):c.1018C>T (p.Pro340Ser)	Benign	0	0	Gene-specific
SOS1	NM_005633.3(SOS1):c.1655G>T (p.Arg552Met)	Likely Pathogenic	1	2	Gene-specific
SOS1	NM_005633.3(SOS1):c.1656G>C (p.Arg552Ser)	Pathogenic	1	2	Gene-specific
SOS1	NM_005633.3(SOS1):c.1655G>A (p.Arg552Lys)	Pathogenic	1	2	Gene-specific
SOS1	NM_005633.3(SOS1):c.2371C>A (p.Leu791Ile)	Benign	0	-2	Gene-specific
SOS1	NM_005633.3(SOS1):c.806T>C (p.Met269Thr)	Pathogenic	1	2	Gene-specific
SOS1	NM_005633.3(SOS1):c.1385T>A (p.Phe462Tyr)	Uncertain Significance	1	2	Gene-specific
SOS1	NM_005633.3(SOS1):c.1666G>A (p.Val556Ile)	Uncertain Significance	0	0	Gene-specific
SOS1	NM_005633.3(SOS1):c.553A>G (p.Ile185Val)	Benign	0	-2	Gene-specific
SOS1	NM_005633.3(SOS1):c.2010G>C (p.Leu670Phe)	Benign	0	-2	Gene-specific
SOS1	NM_005633.3(SOS1):c.350T>G (p.Val117Gly)	Likely Benign	1	1	Gene-specific
SOS1	NM_005633.3(SOS1):c.322G>A (p.Glu108Lys)	Pathogenic	0	1	Gene-specific
SOS1	NM_005633.3(SOS1):c.3709C>A (p.Pro1237Thr)	Likely Benign	0	0	Gene-specific
SOS1	NM_005633.3(SOS1):c.3721A>G (p.Lys1241Glu)	Uncertain Significance	0	-1	Gene-specific
SOS1	NM_005633.3(SOS1):c.1645A>G (p.Thr549Ala)	Uncertain Significance	0	0	Gene-specific
SOS1	NM_005633.3(SOS1):c.899G>A (p.Arg300Gln)	Likely Benign	-1	-2	Gene-specific
SOS1	NM_005633.3(SOS1):c.512T>C (p.Val171Ala)	Likely Pathogenic	0	0	Gene-specific
SOS1	NM_005633.3(SOS1):c.1654A>T (p.Arg552Trp)	Likely Pathogenic	1	2	Gene-specific
SOS1	NM_005633.3(SOS1):c.2122G>A (p.Ala708Thr)	Benign	0	-2	Gene-specific
SOS1	NM_005633.3(SOS1):c.749T>C (p.Val250Ala)	Benign	0	-2	Gene-specific
SOS1	NM_005633.3(SOS1):c.1642A>C (p.Ser548Arg)	Pathogenic	1	1	Gene-specific
SOS1	NM_005633.3(SOS1):c.1642A>C (p.Ser548Arg)	Pathogenic	1	1	Gene-specific
SOS1	NM_005633.3(SOS1):c.2536G>A (p.Glu846Lys)	Pathogenic	1	0	Gene-specific
SOS1	NM_005633.3(SOS1):c.1705C>G (p.Leu569Val)	Likely Benign	0	0	Gene-specific
SOS1	NM_005633.3(SOS1):c.1964C>T (p.Pro655Leu)	Benign	0	-2	Gene-specific
SOS1	NM_005633.3(SOS1):c.1656G>T (p.Arg552Ser)	Pathogenic	1	2	Gene-specific
SOS1	NM_005633.3(SOS1):c.1772A>G (p.Asn591Ser)	Benign	0	-2	Gene-specific
SOS1	NM_005633.3(SOS1):c.3032A>G (p.Asn1011Ser)	Benign	0	-2	Gene-specific
SOS1	NM_005633.3(SOS1):c.508A>G (p.Lys170Glu)	Pathogenic	1	2	Gene-specific
SOS1	NM_005633.3(SOS1):c.3658G>A (p.Val1220Met)	Likely Benign	0	-1	Gene-specific
SOS1	NM_005633.3(SOS1):c.3322G>A (p.Asp1108Asn)	Likely Benign	0	-1	Gene-specific
SOS1	NM_005633.3(SOS1):c.1646C>A (p.Thr549Lys)	Uncertain Significance	0	1	Gene-specific
SOS1	NM_005633.3(SOS1):c.512T>G (p.Val171Gly)	Pathogenic	1	1	Gene-specific
SOS1	NM_005633.3(SOS1):c.3703C>T (p.Pro1235Ser)	Uncertain Significance	0	0	Gene-specific
SOS1	NM_005633.3(SOS1):c.2156G>C (p.Gly719Ala)	Likely Benign	0	-2	Gene-specific
SOS1	NM_005633.3(SOS1):c.698A>G (p.Asn233Ser)	Likely Benign	0	-1	Gene-specific
SOS1	NM_005633.3(SOS1):c.109A>G (p.Thr37Ala)	Likely Benign	-1	-1	Gene-specific
SOS1	NM_005633.3(SOS1):c.73C>T (p.Pro25Ser)	Benign	0	-1	Gene-specific
SOS1	NM_005633.3(SOS1):c.1654A>G (p.Arg552Gly)	Pathogenic	1	2	Gene-specific
SOS1	NM_005633.3(SOS1):c.280A>G (p.Ile94Val)	Likely Benign	0	0	Gene-specific
TCF4	NM_001083962.2(TCF4):c.341G>A (p.Arg114Lys)	Benign	0	0	Gene-specific
TCF4	NM_001083962.2(TCF4):c.305G>A (p.Ser102Asn)	Likely Benign	-1	-2	Gene-specific
TCF4	NM_001083962.2(TCF4):c.242C>G (p.Thr81Ser)	Uncertain Significance	-1	-2	Gene-specific
TCF4	NM_001083962.2(TCF4):c.706C>G (p.Pro236Ala)	Likely Benign	-1	-2	Gene-specific
TCF4	NM_001083962.2(TCF4):c.584A>G (p.Asn195Ser)	Likely Benign	-1	-2	Gene-specific
TCF4	NM_001083962.2(TCF4):c.1744C>T (p.Arg582Cys)	Likely Pathogenic	1	2	Gene-specific
TCF4	NM_001083962.2(TCF4):c.466C>A (p.Pro156Thr)	Likely Benign	-1	-2	Gene-specific
TCF4	NM_001083962.2(TCF4):c.1990G>A (p.Ala664Thr)	Benign	-1	-2	Gene-specific
TCF4	NM_001083962.2(TCF4):c.245G>A (p.Ser82Asn)	Likely Benign	-1	-2	Gene-specific
TCF4	NM_001083962.2(TCF4):c.1774G>A (p.Gly592Ser)	Likely Pathogenic	0	3	Gene-specific
TCF4	NM_001083962.2(TCF4):c.413C>G (p.Thr138Ser)	Likely Benign	-1	-2	Gene-specific
TCF4	NM_001083962.1(TCF4):c.1826T>C (p.Leu609Pro)	Likely Pathogenic	1	3	Gene-specific
TCF4	NM_001083962.2(TCF4):c.1349T>C (p.Met450Thr)	Uncertain Significance	0	0	Gene-specific
TCF4	NM_001083962.2(TCF4):c.944C>T (p.Ala315Val)	Benign	0	0	Gene-specific
TCF4	NM_001083962.1(TCF4):c.1739G>A (p.Arg580Gln)	Pathogenic	1	3	Gene-specific
TCF4	NM_001083962.1(TCF4):c.1727G>A (p.Arg576Gln)	Pathogenic	1	3	Gene-specific
TCF4	NM_001083962.1(TCF4):c.1738C>T (p.Arg580Trp)	Pathogenic	1	3	Gene-specific
TCF4	NM_001083962.2(TCF4):c.1741G>T (p.Val581Phe)	Likely Pathogenic	1	3	Gene-specific
TCF4	NM_001083962.2(TCF4):c.269A>G (p.Asn90Ser)	Benign	-1	-2	Gene-specific
TCF4	NM_001083962.2(TCF4):c.1733G>A (p.Arg578His)	Pathogenic	1	3	Gene-specific
TCF4	NM_001083962.1(TCF4):c.759C>G (p.Ser253Arg)	Likely Pathogenic	0	-1	Gene-specific
TCF4	NM_001083962.2(TCF4):c.1318G>A (p.Gly440Ser)	Benign	0	-1	Gene-specific
TCF4	NM_001083962.2(TCF4):c.1348A>G (p.Met450Val)	Likely Benign	0	0	Gene-specific
TCF4	NM_001083962.2(TCF4):c.1283G>T (p.Gly428Val)	Benign	0	0	Gene-specific
TCF4	NM_001083962.2(TCF4):c.1817C>T (p.Thr606Ile)	Likely Pathogenic	1	2	Gene-specific
TP53	NM_000546.5(TP53):c.322G>A (p.Gly108Ser)	Likely Benign	-1	-2	Gene-specific
TP53	NM_000546.5(TP53):c.851C>T (p.Thr284Ile)	Likely Benign	0	0	Gene-specific
TP53	NM_000546.6(TP53):c.760A>G (p.Ile254Val)	Likely Benign	1	0	Gene-specific
TP53	NM_000546.6(TP53):c.188C>G (p.Ala63Gly)	Likely Benign	-1	-4	Gene-specific
TP53	NM_000546.5(TP53):c.1066G>C (p.Gly356Arg)	Likely Benign	-1	-4	Gene-specific
TP53	NM_000546.6(TP53):c.537T>A (p.His179Gln)	Pathogenic	0	0	Gene-specific
TP53	NM_000546.6(TP53):c.659A>G (p.Tyr220Cys)	Pathogenic	2	4	Gene-specific
TP53	NM_000546.5(TP53):c.455C>T (p.Pro152Leu)	Pathogenic	2	3	Gene-specific
TP53	NM_000546.5(TP53):c.743G>T (p.Arg248Leu)	Pathogenic	2	4	Gene-specific
TP53	NM_000546.5(TP53):c.403T>G (p.Cys135Gly)	Pathogenic	2	4	Gene-specific
TP53	NM_000546.5(TP53):c.145G>A (p.Asp49Asn)	Benign	-1	-4	Gene-specific
TP53	NM_000546.5(TP53):c.28G>A (p.Val10Ile)	Benign	-1	-4	Gene-specific
TP53	NM_000546.5(TP53):c.1000G>C (p.Gly334Arg)	Uncertain Significance	0	4	Gene-specific
TP53	NM_000546.5(TP53):c.847C>T (p.Arg283Cys)	Likely Benign	1	0	Gene-specific
TP53	NM_000546.5(TP53):c.461G>A (p.Gly154Asp)	Uncertain Significance	2	0	Gene-specific
TP53	NM_000546.5(TP53):c.221C>T (p.Ala74Val)	Likely Benign	-1	-4	Gene-specific
TP53	NM_000546.5(TP53):c.364G>A (p.Val122Met)	Likely Benign	-1	0	Gene-specific
TP53	NM_001126112.2(TP53):c.1150A>G (p.Met384Val)	Likely Benign	-1	-4	Gene-specific
TP53	NM_000546.6(TP53):c.1135C>A (p.Arg379Ser)	Likely Benign	-1	-4	Gene-specific
TP53	NM_000546.6(TP53):c.1102C>T (p.His368Tyr)	Uncertain Significance	-1	-4	Gene-specific
TP53	NM_000546.6(TP53):c.149T>C (p.Ile50Thr)	Likely Benign	-1	-4	Gene-specific
TP53	NM_000546.6(TP53):c.1015G>C (p.Glu339Gln)	Likely Benign	-1	0	Gene-specific
TP53	NM_000546.5(TP53):c.1060C>A (p.Gln354Lys)	Benign	-1	-4	Gene-specific
TP53	NM_000546.5(TP53):c.1025G>A (p.Arg342Gln)	Likely Benign	-1	-4	Gene-specific
TP53	NM_000546.5(TP53):c.704A>G (p.Asn235Ser)	Benign	-1	-3	Gene-specific
TP53	NM_000546.5(TP53):c.818G>A (p.Arg273His)	Pathogenic	1	3	Gene-specific
TP53	NM_001126112.2(TP53):c.431A>T (p.Gln144Leu)	Uncertain Significance	0	0	Gene-specific
TP53	NM_000546.5(TP53):c.214C>G (p.Pro72Ala)	Likely Benign	-1	-4	Gene-specific
TP53	NM_000546.5(TP53):c.572C>G (p.Pro191Arg)	Likely Benign	-1	-2	Gene-specific
TP53	NM_000546.5(TP53):c.144C>A (p.Asp48Glu)	Likely Benign	-1	-4	Gene-specific
TP53	NM_001126112.2(TP53):c.215C>A (p.Pro72His)	Benign	-1	-4	Gene-specific
TP53	NM_001126112.2(TP53):c.1136G>T (p.Arg379Leu)	Likely Benign	-1	-4	Gene-specific
TP53	NM_000546.5(TP53):c.480G>A (p.Met160Ile)	Likely Benign	0	-1	Gene-specific
TP53	NM_000546.5(TP53):c.949C>A (p.Gln317Lys)	Benign	-1	-4	Gene-specific
TP53	NM_000546.5(TP53):c.1136G>A (p.Arg379His)	Likely Benign	-1	-4	Gene-specific
TP53	NM_000546.6(TP53):c.556G>A (p.Asp186Asn)	Likely Benign	-1	-4	Gene-specific
TP53	NM_001126112.2(TP53):c.344A>G (p.His115Arg)	Likely Benign	-1	-4	Gene-specific
TP53	NM_000546.5(TP53):c.107C>A (p.Pro36Gln)	Benign	-1	-4	Gene-specific
TP53	NM_000546.6(TP53):c.105G>C (p.Leu35Phe)	Likely Benign	-1	-4	Gene-specific
TP53	NM_000546.6(TP53):c.523C>G (p.Arg175Gly)	Pathogenic	2	2	Gene-specific
TP53	NM_000546.6(TP53):c.105G>T (p.Leu35Phe)	Uncertain Significance	-1	-4	Gene-specific
TP53	NM_000546.6(TP53):c.21T>A (p.Asp7Glu)	Likely Benign	-1	-4	Gene-specific
TP53	NM_000546.6(TP53):c.206C>G (p.Ala69Gly)	Uncertain Significance	-1	-4	Gene-specific
TP53	NM_000546.5(TP53):c.742C>T (p.Arg248Trp)	Pathogenic	2	4	Gene-specific
TP53	NM_000546.5(TP53):c.217G>A (p.Val73Met)	Benign	-1	-4	Gene-specific
TP53	NM_000546.6(TP53):c.743G>A (p.Arg248Gln)	Pathogenic	1	4	Gene-specific
TP53	NM_001126112.2(TP53):c.509C>T (p.Thr170Met)	Likely Benign	0	3	Gene-specific
TP53	NM_000546.6(TP53):c.997C>T (p.Arg333Cys)	Likely Benign	1	3	Gene-specific
TP53	NM_001126112.2(TP53):c.370T>A (p.Cys124Ser)	Likely Benign	2	0	Gene-specific
TP53	NM_001126112.2(TP53):c.370T>A (p.Cys124Ser)	Likely Benign	2	-1	Gene-specific
TP53	NM_000546.6(TP53):c.329G>A (p.Arg110His)	Likely Benign	-1	-3	Gene-specific
TP53	NM_001126112.2(TP53):c.907A>G (p.Ser303Gly)	Likely Benign	-1	-4	Gene-specific
TP53	NM_001126112.2(TP53):c.469G>A (p.Val157Ile)	Likely Benign	-1	-4	Gene-specific
TP53	NM_000546.5(TP53):c.11C>T (p.Pro4Leu)	Likely Benign	-1	-4	Gene-specific
TP53	NM_000546.5(TP53):c.875A>G (p.Lys292Arg)	Likely Benign	-1	-4	Gene-specific
TP53	NM_000546.6(TP53):c.524G>T (p.Arg175Leu)	Likely Pathogenic	2	4	Gene-specific
TP53	NM_000546.5(TP53):c.538G>A (p.Glu180Lys)	Likely Pathogenic	1	2	Gene-specific
TP53	NM_000546.5(TP53):c.488A>G (p.Tyr163Cys)	Pathogenic	2	3	Gene-specific
TP53	NM_000546.5(TP53):c.1031T>C (p.Leu344Pro)	Likely Pathogenic	2	3	Gene-specific
TP53	NM_000546.5(TP53):c.1040C>A (p.Ala347Asp)	Pathogenic	0	1	Gene-specific
TP53	NM_000546.6(TP53):c.1079G>C (p.Gly360Ala)	Benign	-1	-4	Gene-specific
TP53	NM_000546.5(TP53):c.892G>A (p.Glu298Lys)	Benign	-1	-4	Gene-specific
TP53	NM_000546.5(TP53):c.935C>G (p.Thr312Ser)	Benign	-1	-4	Gene-specific
TP53	NM_000546.5(TP53):c.139C>T (p.Pro47Ser)	Benign	-1	-4	Gene-specific
TP53	NM_000546.5(TP53):c.393C>A (p.Asn131Lys)	Uncertain Significance	0	-1	Gene-specific
TP53	NM_000546.5(TP53):c.1003C>T (p.Arg335Cys)	Likely Benign	1	1	Gene-specific
TP53	NM_000546.6(TP53):c.143A>G (p.Asp48Gly)	Likely Benign	-1	-4	Gene-specific
TP53	NM_000546.5(TP53):c.886C>T (p.His296Tyr)	Likely Benign	-1	-4	Gene-specific
TP53	NM_001126112.2(TP53):c.250G>A (p.Ala84Thr)	Likely Benign	-1	-4	Gene-specific
TP53	NM_000546.6(TP53):c.523C>T (p.Arg175Cys)	Uncertain Significance	2	2	Gene-specific
TP53	NM_000546.5(TP53):c.554G>A (p.Ser185Asn)	Likely Benign	-1	-4	Gene-specific
TP53	NM_001126112.2(TP53):c.943T>A (p.Ser315Thr)	Likely Benign	-1	-4	Gene-specific
TP53	NM_000546.5(TP53):c.779C>A (p.Ser260Tyr)	Likely Benign	0	-1	Gene-specific
TP53	NM_000546.6(TP53):c.524G>A (p.Arg175His)	Pathogenic	1	4	Gene-specific
TP53	NM_000546.6(TP53):c.1025G>C (p.Arg342Pro)	Pathogenic	1	-1	Gene-specific
TP53	NM_000546.5(TP53):c.517G>A (p.Val173Met)	Pathogenic	0	4	Gene-specific
TP53	NM_000546.5(TP53):c.641A>G (p.His214Arg)	Pathogenic	0	3	Gene-specific
TP53	NM_000546.5(TP53):c.532C>G (p.His178Asp)	Pathogenic	2	4	Gene-specific
TP53	NM_000546.6(TP53):c.883C>T (p.Pro295Ser)	Likely Benign	-1	-4	Gene-specific
TP53	NM_000546.5(TP53):c.1120G>C (p.Gly374Arg)	Benign	-1	-4	Gene-specific
TP53	NM_000546.5(TP53):c.869G>A (p.Arg290His)	Benign	-1	-3	Gene-specific
TP53	NM_000546.5(TP53):c.1096T>G (p.Ser366Ala)	Benign	-1	-3	Gene-specific
TP53	NM_000546.6(TP53):c.733G>A (p.Gly245Ser)	Pathogenic	1	4	Gene-specific
TP53	NM_000546.5(TP53):c.814G>A (p.Val272Met)	Pathogenic	0	4	Gene-specific
TP53	NM_001126112.2(TP53):c.711G>A (p.Met237Ile)	Pathogenic	0	4	Gene-specific
TP53	NM_000546.5(TP53):c.868C>T (p.Arg290Cys)	Likely Benign	-1	0	Gene-specific
TP53	NM_000546.5(TP53):c.800G>A (p.Arg267Gln)	Uncertain Significance	1	4	Gene-specific
TP53	NM_001126112.2(TP53):c.998G>A (p.Arg333His)	Benign	-1	-4	Gene-specific
TP53	NM_000546.5(TP53):c.541C>A (p.Arg181Ser)	Uncertain Significance	2	0	Gene-specific
TP53	NM_001126112.2(TP53):c.569C>T (p.Pro190Leu)	Likely Pathogenic	2	2	Gene-specific
TP53	NM_000546.5(TP53):c.467G>A (p.Arg156His)	Uncertain Significance	0	-2	Gene-specific
TP53	NM_001126112.2(TP53):c.380C>A (p.Ser127Tyr)	Pathogenic	2	4	Gene-specific
TP53	NM_000546.5(TP53):c.28G>C (p.Val10Leu)	Likely Benign	-1	-4	Gene-specific
TP53	NM_000546.5(TP53):c.396G>C (p.Lys132Asn)	Likely Pathogenic	2	4	Gene-specific
TP53	NM_000546.5(TP53):c.1163A>C (p.Glu388Ala)	Likely Benign	-1	-4	Gene-specific
TP53	NM_001126112.2(TP53):c.607G>A (p.Val203Met)	Uncertain Significance	-1	-4	Gene-specific
TP53	NM_000546.5(TP53):c.353C>T (p.Thr118Ile)	Likely Benign	2	4	Gene-specific
TP53	NM_000546.6(TP53):c.640C>T (p.His214Tyr)	Uncertain Significance	1	0	Gene-specific
TP53	NM_001126112.2(TP53):c.329G>C (p.Arg110Pro)	Pathogenic	0	-3	Gene-specific
TP53	NM_000546.6(TP53):c.332T>A (p.Leu111Gln)	Pathogenic	2	3	Gene-specific
TP53	NM_000546.6(TP53):c.460G>C (p.Gly154Arg)	Uncertain Significance	2	0	Gene-specific
TP53	NM_000546.6(TP53):c.328C>T (p.Arg110Cys)	Uncertain Significance	-1	-4	Gene-specific
TP53	NM_000546.6(TP53):c.329G>T (p.Arg110Leu)	Pathogenic	1	-2	Gene-specific
TP53	NM_000546.6(TP53):c.490A>G (p.Lys164Glu)	Pathogenic	1	3	Gene-specific
TP53	NM_000546.6(TP53):c.413C>T (p.Ala138Val)	Likely Pathogenic	1	3	Gene-specific
TP53	NM_000546.5(TP53):c.511G>A (p.Glu171Lys)	Likely Benign	1	3	Gene-specific
TP53	NM_000546.6(TP53):c.641A>T (p.His214Leu)	Likely Pathogenic	1	3	Gene-specific
TP53	NM_000546.6(TP53):c.1009C>T (p.Arg337Cys)	Pathogenic	1	0	Gene-specific
TP53	NM_000546.6(TP53):c.328C>G (p.Arg110Gly)	Likely Pathogenic	-1	-4	Gene-specific
TP53	NM_000546.6(TP53):c.1010G>C (p.Arg337Pro)	Likely Pathogenic	1	0	Gene-specific
TP53	NM_000546.6(TP53):c.1009C>G (p.Arg337Gly)	Likely Pathogenic	-1	0	Gene-specific
TP53	NM_000546.6(TP53):c.413C>A (p.Ala138Asp)	Uncertain Significance	2	4	Gene-specific
TP53	NM_000546.6(TP53):c.412G>C (p.Ala138Pro)	Likely Pathogenic	1	4	Gene-specific
TP53	NM_000546.6(TP53):c.412G>A (p.Ala138Thr)	Uncertain Significance	1	4	Gene-specific
TP53	NM_000546.6(TP53):c.436T>G (p.Trp146Gly)	Uncertain Significance	-1	-4	Gene-specific
TP53	NM_000546.6(TP53):c.784G>A (p.Gly262Ser)	Likely Benign	1	3	Gene-specific
TP53	NM_000546.6(TP53):c.946C>A (p.Pro316Thr)	Likely Benign	-1	-4	Gene-specific
TP53	NM_000546.6(TP53):c.1010G>T (p.Arg337Leu)	Likely Pathogenic	-1	0	Gene-specific
USH2A	NM_206933.4(USH2A):c.12874A>G (p.Asn4292Asp)	Likely Pathogenic	1	3	Gene-specific
USH2A	NM_206933.4(USH2A):c.14419G>A (p.Ala4807Thr)	Uncertain Significance	0	2	Gene-specific
USH2A	NM_206933.4(USH2A):c.9921T>G (p.Cys3307Trp)	Uncertain Significance	0	2	Gene-specific
USH2A	NM_206933.3(USH2A):c.5516T>A (p.Val1839Glu)	Likely Pathogenic	0	2	Gene-specific
USH2A	NM_206933.3(USH2A):c.2081G>A (p.Cys694Tyr)	Likely Pathogenic	1	3	Gene-specific
USH2A	NM_206933.2(USH2A):c.8177G>A (p.Gly2726Glu)	Uncertain Significance	0	1	Gene-specific
USH2A	NM_206933.2(USH2A):c.2522C>A (p.Ser841Tyr)	Benign	0	2	Gene-specific
USH2A	NM_206933.4(USH2A):c.13396C>T (p.Pro4466Ser)	Uncertain Significance	-1	-3	Gene-specific
USH2A	NM_206933.2(USH2A):c.15562A>G (p.Ser5188Gly)	Benign	0	-3	Gene-specific
USH2A	NM_206933.4(USH2A):c.13808A>C (p.His4603Pro)	Likely Pathogenic	0	0	Gene-specific
USH2A	NM_206933.2(USH2A):c.8320G>A (p.Ala2774Thr)	Likely Benign	-1	-3	Gene-specific
USH2A	NM_206933.3(USH2A):c.9433C>T (p.Leu3145Phe)	Uncertain Significance	0	0	Gene-specific
USH2A	NM_206933.2(USH2A):c.5581G>A (p.Gly1861Ser)	Pathogenic	1	3	Gene-specific
USH2A	NM_206933.4(USH2A):c.15494C>G (p.Ala5165Gly)	Likely Benign	-1	-3	Gene-specific
USH2A	NM_206933.2(USH2A):c.15433G>A (p.Val5145Ile)	Benign	-1	-3	Gene-specific
USH2A	NM_206933.2(USH2A):c.2276G>T (p.Cys759Phe)	Pathogenic	1	3	Gene-specific
USH2A	NM_206933.2(USH2A):c.4714C>T (p.Leu1572Phe)	Likely Benign	0	2	Gene-specific
USH2A	NM_206933.3(USH2A):c.13217T>C (p.Leu4406Pro)	Uncertain Significance	0	0	Gene-specific
USH2A	NM_206933.3(USH2A):c.12575G>A (p.Arg4192His)	Benign	-1	-3	Gene-specific
USH2A	NM_206933.4(USH2A):c.6233C>G (p.Pro2078Arg)	Uncertain Significance	1	3	Gene-specific
USH2A	NM_206933.3(USH2A):c.7334C>T (p.Ser2445Phe)	Benign	0	0	Gene-specific
USH2A	NM_206933.2(USH2A):c.5039A>G (p.Lys1680Arg)	Uncertain Significance	0	0	Gene-specific
USH2A	NM_206933.2(USH2A):c.14276G>A (p.Gly4759Glu)	Likely Benign	0	-3	Gene-specific
USH2A	NM_206933.4(USH2A):c.6446C>A (p.Pro2149Gln)	Uncertain Significance	0	0	Gene-specific
USH2A	NM_206933.4(USH2A):c.12505A>G (p.Thr4169Ala)	Likely Benign	0	-2	Gene-specific
USH2A	NM_206933.4(USH2A):c.1966G>A (p.Asp656Asn)	Likely Benign	-1	-3	Gene-specific
VWF	NM_000552.5(VWF):c.2278C>T (p.Arg760Cys)	Likely Pathogenic	-1	-1	Gene-specific
VWF	NM_000552.5(VWF):c.4241T>G (p.Val1414Gly)	Uncertain Significance	1	2	Gene-specific
VWF	NM_000552.5(VWF):c.4883T>C (p.Ile1628Thr)	Pathogenic	1	1	Gene-specific
VWF	NM_000552.5(VWF):c.6553C>T (p.Arg2185Trp)	Uncertain Significance	1	1	Gene-specific
VWF	NM_000552.5(VWF):c.6859C>T (p.Arg2287Trp)	Uncertain Significance	0	0	Gene-specific
VWF	NM_000552.5(VWF):c.8113G>A (p.Gly2705Arg)	Benign	0	-1	Gene-specific
VWF	NM_000552.5(VWF):c.3941T>A (p.Val1314Asp)	Pathogenic	1	1	Gene-specific
VWF	NM_000552.4(VWF):c.3970G>A (p.Gly1324Ser)	Pathogenic	1	1	Gene-specific
VWF	NM_000552.5(VWF):c.2220G>A (p.Met740Ile)	Benign	-1	-2	Gene-specific
VWF	NM_000552.5(VWF):c.3692A>C (p.Asn1231Thr)	Likely Benign	-1	-2	Gene-specific
VWF	NM_000552.5(VWF):c.3944G>A (p.Arg1315His)	Likely Pathogenic	1	1	Gene-specific
VWF	NM_000552.5(VWF):c.4138A>G (p.Ile1380Val)	Benign	-1	-2	Gene-specific
VWF	NM_000552.4(VWF):c.3922C>T (p.Arg1308Cys)	Pathogenic	1	0	Gene-specific
VWF	NM_000552.4(VWF):c.3437A>G (p.Tyr1146Cys)	Pathogenic	1	2	Gene-specific
VWF	NM_000552.5(VWF):c.4244G>A (p.Gly1415Asp)	Likely Pathogenic	1	2	Gene-specific
VWF	NM_000552.5(VWF):c.4693G>T (p.Val1565Leu)	Benign	-1	-2	Gene-specific
VWF	NM_000552.5(VWF):c.4105T>A (p.Phe1369Ile)	Pathogenic	1	2	Gene-specific
VWF	NM_000552.5(VWF):c.3971G>C (p.Gly1324Ala)	Pathogenic	1	1	Gene-specific
VWF	NM_000552.5(VWF):c.3940G>T (p.Val1314Phe)	Pathogenic	1	1	Gene-specific
VWF	NM_000552.5(VWF):c.8318G>C (p.Cys2773Ser)	Pathogenic	1	2	Gene-specific
VWF	NM_000552.5(VWF):c.1728G>T (p.Met576Ile)	Likely Benign	-1	-3	Gene-specific
VWF	NM_000552.5(VWF):c.3686T>G (p.Val1229Gly)	Likely Benign	-1	-2	Gene-specific
VWF	NM_000552.5(VWF):c.3788C>T (p.Ser1263Leu)	Uncertain Significance	-1	-2	Gene-specific
VWF	NM_000552.5(VWF):c.3802C>G (p.His1268Asp)	Pathogenic	-1	-1	Gene-specific
VWF	NM_000552.5(VWF):c.4304A>G (p.Asn1435Ser)	Benign	0	0	Gene-specific
VWF	NM_000552.5(VWF):c.3946G>A (p.Val1316Met)	Pathogenic	1	1	Gene-specific
VWF	NM_000552.4(VWF):c.4022G>A (p.Arg1341Gln)	Pathogenic	1	1	Gene-specific
VWF	NM_000552.5(VWF):c.4195C>T (p.Arg1399Cys)	Likely Pathogenic	1	1	Gene-specific
VWF	NM_000552.5(VWF):c.4399C>T (p.Pro1467Ser)	Uncertain Significance	0	0	Gene-specific
VWF	NM_000552.5(VWF):c.4414G>C (p.Asp1472His)	Benign	-1	-2	Gene-specific
VWF	NM_000552.4(VWF):c.3929C>T (p.Ser1310Phe)	Likely Pathogenic	1	2	Gene-specific
VWF	NM_000552.5(VWF):c.3925A>G (p.Ile1309Val)	Pathogenic	1	2	Gene-specific
VWF	NM_000552.4(VWF):c.4789C>T (p.Arg1597Trp)	Pathogenic	1	1	Gene-specific
VWF	NM_000552.5(VWF):c.4196G>A (p.Arg1399His)	Uncertain Significance	1	1	Gene-specific
VWF	NM_000552.5(VWF):c.5173C>T (p.Pro1725Ser)	Likely Benign	0	0	Gene-specific
VWF	NM_000552.5(VWF):c.2561G>A (p.Arg854Gln)	Pathogenic	0	0	Gene-specific
VWF	NM_000552.4(VWF):c.3916C>T (p.Arg1306Trp)	Pathogenic	1	1	Gene-specific
VWF	NM_000552.5(VWF):c.391G>A (p.Gly131Ser)	Likely Benign	-1	-2	Gene-specific
VWF	NM_000552.5(VWF):c.4121G>A (p.Arg1374His)	Pathogenic	1	2	Gene-specific
VWF	NM_000552.5(VWF):c.2635G>A (p.Asp879Asn)	Pathogenic	1	0	Gene-specific
VWF	NM_000552.5(VWF):c.4141A>G (p.Thr1381Ala)	Benign	-1	-2	Gene-specific
VWF	NM_000552.5(VWF):c.7997C>T (p.Thr2666Met)	Likely Benign	-1	-3	Gene-specific
VWF	NM_000552.5(VWF):c.6187C>T (p.Pro2063Ser)	Likely Benign	0	0	Gene-specific
VWF	NM_000552.4(VWF):c.2372C>T (p.Thr791Met)	Pathogenic	1	2	Gene-specific
VWF	NM_000552.5(VWF):c.2446C>T (p.Arg816Trp)	Pathogenic	1	1	Gene-specific
VWF	NM_000552.4(VWF):c.2435C>T (p.Pro812Leu)	Uncertain Significance	1	0	Gene-specific
VWF	NM_000552.5(VWF):c.2510C>A (p.Ala837Asp)	Likely Benign	-1	-2	Gene-specific
VWF	NM_000552.5(VWF):c.2900G>A (p.Gly967Asp)	Likely Benign	0	-1	Gene-specific
VWF	NM_000552.5(VWF):c.3485C>T (p.Pro1162Leu)	Benign	1	1	Gene-specific
VWF	NM_000552.5(VWF):c.4130C>T (p.Ala1377Val)	Uncertain Significance	1	1	Gene-specific
VWF	NM_000552.5(VWF):c.3445T>C (p.Cys1149Arg)	Pathogenic	1	3	Gene-specific
VWF	NM_000552.5(VWF):c.4885G>A (p.Gly1629Arg)	Pathogenic	1	1	Gene-specific
VWF	NM_000552.5(VWF):c.3569G>A (p.Cys1190Tyr)	Pathogenic	1	2	Gene-specific
VWF	NM_000552.5(VWF):c.4885G>C (p.Gly1629Arg)	Pathogenic	1	1	Gene-specific
VWF	NM_000552.5(VWF):c.3568T>C (p.Cys1190Arg)	Pathogenic	1	3	Gene-specific
VWF	NM_000552.5(VWF):c.3569G>T (p.Cys1190Phe)	Likely Pathogenic	1	2	Gene-specific
VWF	NM_000552.5(VWF):c.3797C>A (p.Pro1266Gln)	Uncertain Significance	0	0	Gene-specific
RYR1	NM_000540.3(RYR1):c.14582G>A (p.Arg4861His)	Pathogenic	1	0	Domain-aggregate
RYR1	NM_000540.3(RYR1):c.577T>A (p.Ser193Thr)	Uncertain Significance	1	0	Domain-aggregate
RYR1	NM_000540.3(RYR1):c.8888T>C (p.Leu2963Pro)	Pathogenic	1	2	Domain-aggregate
RYR1	NM_000540.3(RYR1):c.14690G>A (p.Gly4897Asp)	Likely Pathogenic	1	1	Domain-aggregate
RYR1	NM_000540.3(RYR1):c.14815G>A (p.Asp4939Asn)	Uncertain Significance	1	0	Domain-aggregate
RYR1	NM_000540.3(RYR1):c.4729G>A (p.Ala1577Thr)	Uncertain Significance	1	3	Domain-aggregate
RYR1	NM_000540.3(RYR1):c.13949T>C (p.Leu4650Pro)	Uncertain Significance	1	2	Domain-aggregate
RYR1	NM_000540.3(RYR1):c.14173G>C (p.Val4725Leu)	Uncertain Significance	0	1	Domain-aggregate
RYR1	NM_000540.3(RYR1):c.2677G>A (p.Gly893Ser)	Benign	0	0	Domain-aggregate
RYR1	NM_000540.2(RYR1):c.7036G>A (p.Val2346Met)	Uncertain Significance	2	2	Domain-aggregate
RYR1	NM_000540.2(RYR1):c.6488G>T (p.Arg2163Leu)	Likely Pathogenic	2	1	Domain-aggregate
RYR1	NM_000540.3(RYR1):c.1589G>A (p.Arg530His)	Likely Pathogenic	2	2	Domain-aggregate
RYR1	NM_000540.2(RYR1):c.6838G>A (p.Val2280Ile)	Likely Pathogenic	0	-2	Domain-aggregate
RYR1	NM_000540.2(RYR1):c.5183C>T (p.Ser1728Phe)	Likely Pathogenic	-1	0	Domain-aggregate
RYR1	NM_000540.2(RYR1):c.12532G>A (p.Gly4178Ser)	Uncertain Significance	2	4	Domain-aggregate
RYR1	NM_000540.2(RYR1):c.1100G>A (p.Arg367Gln)	Uncertain Significance	0	0	Domain-aggregate
RYR1	NM_000540.3(RYR1):c.38T>G (p.Leu13Arg)	Likely Pathogenic	0	0	Domain-aggregate
RYR1	NM_000540.3(RYR1):c.1597C>A (p.Arg533Ser)	Uncertain Significance	2	0	Domain-aggregate
RYR1	NM_000540.3(RYR1):c.7073T>A (p.Ile2358Asn)	Uncertain Significance	2	0	Domain-aggregate
RYR1	NM_000540.2(RYR1):c.7199A>G (p.Asp2400Gly)	Uncertain Significance	0	0	Domain-aggregate
RYR1	NM_000540.3(RYR1):c.7354C>T (p.Arg2452Trp)	Likely Pathogenic	0	2	Domain-aggregate
RYR1	NM_000540.2(RYR1):c.6478G>A (p.Gly2160Ser)	Uncertain Significance	0	-2	Domain-aggregate
RYR1	NM_000540.3(RYR1):c.152C>A (p.Thr51Asn)	Uncertain Significance	0	0	Domain-aggregate
RYR1	NM_000540.2(RYR1):c.178G>A (p.Asp60Asn)	Uncertain Significance	0	0	Domain-aggregate
RYR1	NM_000540.2(RYR1):c.677T>A (p.Met226Lys)	Uncertain Significance	0	0	Domain-aggregate
RYR1	NM_000540.2(RYR1):c.496G>A (p.Asp166Asn)	Uncertain Significance	0	0	Domain-aggregate
RYR1	NM_000540.2(RYR1):c.12355A>T (p.Asn4119Tyr)	Uncertain Significance	0	2	Domain-aggregate
RYR1	NM_000540.2(RYR1):c.14002C>T (p.Pro4668Ser)	Uncertain Significance	2	3	Domain-aggregate
RYR1	NM_000540.2(RYR1):c.13672C>T (p.Arg4558Trp)	Uncertain Significance	0	2	Domain-aggregate
RYR1	NM_000540.2(RYR1):c.14449A>T (p.Ile4817Phe)	Uncertain Significance	2	0	Domain-aggregate
RYR1	NM_000540.2(RYR1):c.12533G>T (p.Gly4178Val)	Uncertain Significance	2	3	Domain-aggregate
RYR1	NM_000540.2(RYR1):c.3527C>T (p.Thr1176Ile)	Uncertain Significance	-1	-3	Domain-aggregate
RYR1	NM_000540.2(RYR1):c.1615T>C (p.Phe539Leu)	Likely Pathogenic	2	2	Domain-aggregate
RYR1	NM_000540.2(RYR1):c.6742C>T (p.Arg2248Cys)	Uncertain Significance	0	-1	Domain-aggregate
RYR1	NM_000540.2(RYR1):c.6743G>A (p.Arg2248His)	Uncertain Significance	0	-2	Domain-aggregate
RYR1	NM_000540.2(RYR1):c.7032G>C (p.Glu2344Asp)	Uncertain Significance	0	-2	Domain-aggregate
RYR1	NM_000540.2(RYR1):c.7085A>G (p.Glu2362Gly)	Uncertain Significance	2	2	Domain-aggregate
RYR1	NM_000540.2(RYR1):c.14567C>G (p.Ala4856Gly)	Uncertain Significance	2	1	Domain-aggregate
RYR1	NM_000540.2(RYR1):c.14639T>C (p.Met4880Thr)	Uncertain Significance	2	1	Domain-aggregate
RYR1	NM_000540.2(RYR1):c.7778G>A (p.Arg2593His)	Uncertain Significance	0	2	Domain-aggregate
RYR1	NM_000540.3(RYR1):c.11315G>A (p.Arg3772Gln)	Likely Pathogenic	2	3	Domain-aggregate
RYR1	NM_000540.3(RYR1):c.9310G>A (p.Glu3104Lys)	Likely Pathogenic	2	3	Domain-aggregate
RYR1	NM_000540.2(RYR1):c.14201G>A (p.Gly4734Glu)	Uncertain Significance	2	3	Domain-aggregate
RYR1	NM_000540.2(RYR1):c.14458G>T (p.Gly4820Trp)	Uncertain Significance	2	0	Domain-aggregate
RYR1	NM_000540.2(RYR1):c.742G>C (p.Gly248Arg)	Pathogenic	2	1	Domain-aggregate
RYR1	NM_000540.3(RYR1):c.7304G>A (p.Arg2435His)	Pathogenic	2	3	Domain-aggregate
RYR1	NM_000540.3(RYR1):c.7124G>C (p.Gly2375Ala)	Pathogenic	2	3	Domain-aggregate
RYR1	NM_000540.3(RYR1):c.7063C>T (p.Arg2355Trp)	Pathogenic	2	0	Domain-aggregate
RYR1	NM_000540.2(RYR1):c.10097G>A (p.Arg3366His)	Likely Benign	0	1	Domain-aggregate
RYR1	NM_000540.3(RYR1):c.7373G>A (p.Arg2458His)	Pathogenic	2	3	Domain-aggregate
RYR1	NM_000540.2(RYR1):c.12881C>T (p.Thr4294Met)	Benign	0	0	Domain-aggregate
RYR1	NM_000540.2(RYR1):c.4024A>G (p.Ser1342Gly)	Benign	0	-1	Domain-aggregate
RYR1	NM_000540.2(RYR1):c.529C>T (p.Arg177Cys)	Pathogenic	2	2	Domain-aggregate
RYR1	NM_000540.2(RYR1):c.488G>T (p.Arg163Leu)	Pathogenic	2	1	Domain-aggregate
RYR1	NM_000540.3(RYR1):c.14582G>A (p.Arg4861His)	Uncertain Significance	2	0	Domain-aggregate
RYR1	NM_000540.2(RYR1):c.7522C>T (p.Arg2508Cys)	Likely Pathogenic	2	3	Domain-aggregate
RYR1	NM_000540.3(RYR1):c.14918C>T (p.Pro4973Leu)	Likely Pathogenic	2	3	Domain-aggregate
RYR1	NM_000540.2(RYR1):c.6599C>T (p.Ala2200Val)	Uncertain Significance	0	-3	Domain-aggregate
RYR1	NM_000540.3(RYR1):c.7523G>A (p.Arg2508His)	Likely Pathogenic	2	3	Domain-aggregate
RYR1	NM_000540.2(RYR1):c.6671G>A (p.Arg2224His)	Uncertain Significance	0	-2	Domain-aggregate
RYR1	NM_000540.2(RYR1):c.479A>G (p.Glu160Gly)	Uncertain Significance	2	2	Domain-aggregate
RYR1	NM_000540.2(RYR1):c.2924G>A (p.Arg975Gln)	Uncertain Significance	-1	-3	Domain-aggregate
RYR1	NM_000540.2(RYR1):c.493G>A (p.Gly165Arg)	Uncertain Significance	2	2	Domain-aggregate
RYR1	NM_000540.2(RYR1):c.497A>G (p.Asp166Gly)	Uncertain Significance	2	4	Domain-aggregate
RYR1	NM_000540.2(RYR1):c.11120G>T (p.Arg3707Leu)	Uncertain Significance	2	3	Domain-aggregate
RYR1	NM_000540.2(RYR1):c.12700G>C (p.Val4234Leu)	Likely Pathogenic	2	3	Domain-aggregate
RYR1	NM_000540.2(RYR1):c.12413T>C (p.Ile4138Thr)	Uncertain Significance	2	3	Domain-aggregate
RYR1	NM_000540.2(RYR1):c.6640G>A (p.Val2214Ile)	Uncertain Significance	0	0	Domain-aggregate
RYR1	NM_000540.2(RYR1):c.6847A>C (p.Asn2283His)	Uncertain Significance	2	2	Domain-aggregate
RYR1	NM_000540.2(RYR1):c.1460T>C (p.Leu487Pro)	Uncertain Significance	2	4	Domain-aggregate
RYR1	NM_000540.2(RYR1):c.6349G>C (p.Val2117Leu)	Likely Pathogenic	2	3	Domain-aggregate
RYR1	NM_000540.2(RYR1):c.14558C>T (p.Thr4853Ile)	Uncertain Significance	2	2	Domain-aggregate
RYR1	NM_000540.2(RYR1):c.14817C>A (p.Asp4939Glu)	Uncertain Significance	0	0	Domain-aggregate
RYR1	NM_000540.2(RYR1):c.7317G>C (p.Glu2439Asp)	Uncertain Significance	0	2	Domain-aggregate
RYR1	NM_000540.2(RYR1):c.7528T>C (p.Tyr2510His)	Uncertain Significance	2	3	Domain-aggregate
RYR1	NM_000540.2(RYR1):c.8600T>A (p.Leu2867Gln)	Uncertain Significance	2	2	Domain-aggregate
RYR1	NM_000540.2(RYR1):c.8638G>A (p.Glu2880Lys)	Uncertain Significance	2	2	Domain-aggregate
RYR1	NM_000540.3(RYR1):c.14471T>C (p.Leu4824Pro)	Uncertain Significance	2	2	Domain-aggregate
RYR1	NM_000540.2(RYR1):c.14581C>T (p.Arg4861Cys)	Uncertain Significance	2	0	Domain-aggregate
RYR1	NM_000540.2(RYR1):c.10042C>T (p.Arg3348Cys)	Uncertain Significance	0	2	Domain-aggregate
RYR1	NM_000540.2(RYR1):c.7075C>T (p.Arg2359Trp)	Uncertain Significance	2	1	Domain-aggregate
RYR1	NM_000540.3(RYR1):c.1654C>T (p.Arg552Trp)	Likely Pathogenic	0	0	Domain-aggregate
RYR1	NM_000540.3(RYR1):c.7007G>A (p.Arg2336His)	Pathogenic	2	1	Domain-aggregate
RYR1	NM_000540.3(RYR1):c.6487C>T (p.Arg2163Cys)	Pathogenic	2	2	Domain-aggregate
RYR1	NM_000540.3(RYR1):c.6617C>G (p.Thr2206Arg)	Pathogenic	2	2	Domain-aggregate
RYR1	NM_000540.3(RYR1):c.14545G>A (p.Val4849Ile)	Pathogenic	0	0	Domain-aggregate
RYR1	NM_000540.2(RYR1):c.4178A>G (p.Lys1393Arg)	Benign	0	0	Domain-aggregate
RYR1	NM_000540.2(RYR1):c.7355G>A (p.Arg2452Gln)	Uncertain Significance	2	3	Domain-aggregate
RYR1	NM_000540.3(RYR1):c.10616G>A (p.Arg3539His)	Likely Benign	2	3	Domain-aggregate
RYR1	NM_000540.2(RYR1):c.5317C>T (p.Pro1773Ser)	Benign	0	0	Domain-aggregate
RYR1	NM_000540.3(RYR1):c.7048G>A (p.Ala2350Thr)	Pathogenic	2	2	Domain-aggregate
RYR1	NM_000540.2(RYR1):c.6670C>T (p.Arg2224Cys)	Likely Benign	0	0	Domain-aggregate
RYR1	NM_000540.3(RYR1):c.10204T>G (p.Cys3402Gly)	Pathogenic	1	3	Domain-aggregate
RYR1	NM_000540.2(RYR1):c.14210G>A (p.Arg4737Gln)	Pathogenic	2	3	Domain-aggregate
RYR1	NM_000540.3(RYR1):c.1598G>A (p.Arg533His)	Uncertain Significance	0	0	Domain-aggregate
RYR1	NM_000540.2(RYR1):c.12149C>A (p.Ser4050Tyr)	Likely Pathogenic	2	3	Domain-aggregate
RYR1	NM_000540.2(RYR1):c.14678G>A (p.Arg4893Gln)	Uncertain Significance	2	1	Domain-aggregate
RYR1	NM_000540.2(RYR1):c.7291G>T (p.Asp2431Tyr)	Likely Pathogenic	2	3	Domain-aggregate
RYR1	NM_000540.3(RYR1):c.7372C>T (p.Arg2458Cys)	Likely Pathogenic	2	3	Domain-aggregate
RYR1	NM_000540.3(RYR1):c.11947C>T (p.Arg3983Cys)	Uncertain Significance	2	1	Domain-aggregate
RYR1	NM_000540.3(RYR1):c.13918A>G (p.Met4640Val)	Uncertain Significance	2	3	Domain-aggregate
RYR1	NM_000540.2(RYR1):c.14825G>T (p.Gly4942Val)	Uncertain Significance	2	0	Domain-aggregate
RYR1	NM_000540.2(RYR1):c.7076G>A (p.Arg2359Gln)	Likely Pathogenic	2	1	Domain-aggregate
RYR1	NM_000540.2(RYR1):c.947G>T (p.Arg316Leu)	Uncertain Significance	2	2	Domain-aggregate
RYR1	NM_000540.2(RYR1):c.7385C>T (p.Pro2462Leu)	Uncertain Significance	2	3	Domain-aggregate
RYR1	NM_000540.2(RYR1):c.467G>A (p.Arg156Lys)	Uncertain Significance	2	1	Domain-aggregate
RYR1	NM_000540.3(RYR1):c.130C>T (p.Arg44Cys)	Likely Pathogenic	2	2	Domain-aggregate
RYR1	NM_000540.2(RYR1):c.14879T>A (p.Phe4960Tyr)	Uncertain Significance	2	3	Domain-aggregate
RYR1	NM_000540.3(RYR1):c.12121C>T (p.Arg4041Trp)	Uncertain Significance	-1	0	Domain-aggregate
RYR1	NM_000540.2(RYR1):c.11126C>T (p.Ala3709Val)	Uncertain Significance	0	2	Domain-aggregate
RYR1	NM_000540.2(RYR1):c.10043G>A (p.Arg3348His)	Uncertain Significance	0	2	Domain-aggregate
RYR1	NM_000540.2(RYR1):c.14186A>C (p.His4729Pro)	Uncertain Significance	0	2	Domain-aggregate
RYR1	NM_000540.2(RYR1):c.12398A>G (p.Glu4133Gly)	Uncertain Significance	1	3	Domain-aggregate
RYR1	NM_000540.3(RYR1):c.946C>T (p.Arg316Cys)	Uncertain Significance	0	0	Domain-aggregate
RYR1	NM_000540.2(RYR1):c.14509C>G (p.Gln4837Glu)	Uncertain Significance	2	0	Domain-aggregate
RYR1	NM_000540.2(RYR1):c.4775C>T (p.Pro1592Leu)	Uncertain Significance	2	3	Domain-aggregate
RYR1	NM_000540.2(RYR1):c.6544A>T (p.Ile2182Phe)	Uncertain Significance	0	0	Domain-aggregate
RYR1	NM_000540.2(RYR1):c.14814C>G (p.Ile4938Met)	Uncertain Significance	2	0	Domain-aggregate
RYR1	NM_000540.2(RYR1):c.7097C>G (p.Pro2366Arg)	Uncertain Significance	2	1	Domain-aggregate
RYR1	NM_000540.2(RYR1):c.7210G>A (p.Glu2404Lys)	Uncertain Significance	0	1	Domain-aggregate
RYR1	NM_000540.2(RYR1):c.8026C>T (p.Arg2676Trp)	Likely Pathogenic	0	1	Domain-aggregate
RYR1	NM_000540.2(RYR1):c.1565A>G (p.Tyr522Cys)	Likely Pathogenic	2	2	Domain-aggregate
RYR1	NM_000540.2(RYR1):c.526G>A (p.Glu176Lys)	Uncertain Significance	0	0	Domain-aggregate
RYR1	NM_000540.2(RYR1):c.7123G>A (p.Gly2375Arg)	Likely Pathogenic	2	3	Domain-aggregate
RYR1	NM_000540.3(RYR1):c.7361G>A (p.Arg2454His)	Pathogenic	2	3	Domain-aggregate
RYR1	NM_000540.3(RYR1):c.1201C>T (p.Arg401Cys)	Pathogenic	2	3	Domain-aggregate
RYR1	NM_000540.3(RYR1):c.6617C>T (p.Thr2206Met)	Pathogenic	2	2	Domain-aggregate
RYR1	NM_000540.2(RYR1):c.8360C>G (p.Thr2787Ser)	Benign	0	-2	Domain-aggregate
RYR1	NM_000540.3(RYR1):c.1021G>A (p.Gly341Arg)	Pathogenic	2	1	Domain-aggregate
RYR1	NM_000540.3(RYR1):c.1565A>C (p.Tyr522Ser)	Pathogenic	2	2	Domain-aggregate
RYR1	NM_000540.3(RYR1):c.1840C>T (p.Arg614Cys)	Pathogenic	2	2	Domain-aggregate
RYR1	NM_000540.2(RYR1):c.5132A>G (p.Tyr1711Cys)	Uncertain Significance	0	2	Domain-aggregate
RYR1	NM_000540.3(RYR1):c.7282G>A (p.Ala2428Thr)	Likely Pathogenic	2	3	Domain-aggregate
RYR1	NM_000540.2(RYR1):c.982C>T (p.Arg328Trp)	Likely Pathogenic	0	0	Domain-aggregate
RYR1	NM_000540.2(RYR1):c.528G>T (p.Glu176Asp)	Uncertain Significance	0	-3	Domain-aggregate
RYR1	NM_000540.2(RYR1):c.7291G>A (p.Asp2431Asn)	Likely Pathogenic	2	3	Domain-aggregate
RYR1	NM_000540.2(RYR1):c.7304G>T (p.Arg2435Leu)	Likely Pathogenic	2	3	Domain-aggregate
RYR1	NM_000540.3(RYR1):c.11314C>T (p.Arg3772Trp)	Uncertain Significance	2	3	Domain-aggregate
RYR1	NM_000540.2(RYR1):c.2537C>T (p.Ser846Leu)	Uncertain Significance	0	0	Domain-aggregate
RYR1	NM_000540.3(RYR1):c.488G>A (p.Arg163His)	Uncertain Significance	2	0	Domain-aggregate
RYR1	NM_000540.2(RYR1):c.1100G>T (p.Arg367Leu)	Uncertain Significance	2	1	Domain-aggregate
RYR1	NM_000540.3(RYR1):c.13673G>A (p.Arg4558Gln)	Uncertain Significance	2	3	Domain-aggregate
RYR1	NM_000540.2(RYR1):c.7373G>T (p.Arg2458Leu)	Likely Pathogenic	2	4	Domain-aggregate
RYR1	NM_000540.2(RYR1):c.1453A>G (p.Met485Val)	Uncertain Significance	0	-2	Domain-aggregate
RYR1	NM_000540.2(RYR1):c.7089C>G (p.Cys2363Trp)	Uncertain Significance	0	0	Domain-aggregate
RYR1	NM_000540.2(RYR1):c.97A>G (p.Lys33Glu)	Likely Pathogenic	2	2	Domain-aggregate
RYR1	NM_000540.2(RYR1):c.11953T>C (p.Trp3985Arg)	Uncertain Significance	2	2	Domain-aggregate
RYR1	NM_000540.2(RYR1):c.14270G>A (p.Arg4757His)	Uncertain Significance	-1	0	Domain-aggregate
RYR1	NM_000540.3(RYR1):c.13934G>A (p.Arg4645Gln)	Uncertain Significance	0	0	Domain-aggregate
RYR1	NM_000540.2(RYR1):c.12689T>G (p.Met4230Arg)	Uncertain Significance	2	3	Domain-aggregate
RYR1	NM_000540.2(RYR1):c.6628G>T (p.Val2210Phe)	Likely Pathogenic	2	2	Domain-aggregate
RYR1	NM_000540.3(RYR1):c.251C>T (p.Thr84Met)	Uncertain Significance	0	0	Domain-aggregate
RYR1	NM_000540.2(RYR1):c.7090T>G (p.Phe2364Val)	Likely Pathogenic	2	0	Domain-aggregate
RYR1	NM_000540.2(RYR1):c.5186T>G (p.Met1729Arg)	Uncertain Significance	0	2	Domain-aggregate
RYR1	NM_000540.2(RYR1):c.6387C>G (p.Asp2129Glu)	Likely Pathogenic	0	1	Domain-aggregate
RYR1	NM_000540.2(RYR1):c.6488G>C (p.Arg2163Pro)	Likely Pathogenic	2	2	Domain-aggregate
RYR1	NM_000540.2(RYR1):c.7043A>G (p.Glu2348Gly)	Likely Pathogenic	2	2	Domain-aggregate
RYR1	NM_000540.2(RYR1):c.14680G>A (p.Ala4894Thr)	Uncertain Significance	2	0	Domain-aggregate
RYR1	NM_000540.2(RYR1):c.14782A>G (p.Ile4928Val)	Uncertain Significance	0	0	Domain-aggregate
RYR1	NM_000540.2(RYR1):c.190T>C (p.Cys64Arg)	Uncertain Significance	0	0	Domain-aggregate
RYR1	NM_000540.2(RYR1):c.7310C>T (p.Ala2437Val)	Likely Pathogenic	2	3	Domain-aggregate
RYR1	NM_000540.2(RYR1):c.8189A>G (p.Asp2730Gly)	Uncertain Significance	0	2	Domain-aggregate
RYR1	NM_000540.2(RYR1):c.8198G>A (p.Gly2733Asp)	Uncertain Significance	2	3	Domain-aggregate
RYR1	NM_000540.3(RYR1):c.14126C>T (p.Thr4709Met)	Uncertain Significance	2	3	Domain-aggregate
RYR1	NM_000540.3(RYR1):c.7300G>A (p.Gly2434Arg)	Pathogenic	2	3	Domain-aggregate
RYR1	NM_000540.3(RYR1):c.487C>T (p.Arg163Cys)	Pathogenic	2	2	Domain-aggregate
RYR1	NM_000540.3(RYR1):c.6488G>A (p.Arg2163His)	Pathogenic	2	1	Domain-aggregate
RYR1	NM_000540.3(RYR1):c.8327C>T (p.Ser2776Phe)	Likely Benign	0	0	Domain-aggregate
RYR1	NM_000540.3(RYR1):c.8327C>T (p.Ser2776Phe)	Likely Benign	0	0	Domain-aggregate
RYR1	NM_000540.2(RYR1):c.1841G>T (p.Arg614Leu)	Pathogenic	2	2	Domain-aggregate
RYR1	NM_000540.2(RYR1):c.12884C>T (p.Ala4295Val)	Benign	-1	-2	Domain-aggregate
RYR1	NM_000540.3(RYR1):c.13513G>C (p.Asp4505His)	Benign	0	0	Domain-aggregate
RYR1	NM_000540.2(RYR1):c.4999C>T (p.Arg1667Cys)	Benign	0	-1	Domain-aggregate
RYR1	NM_000540.2(RYR1):c.13502C>T (p.Pro4501Leu)	Benign	0	-2	Domain-aggregate
RYR1	NM_000540.3(RYR1):c.7025A>G (p.Asn2342Ser)	Likely Benign	0	-2	Domain-aggregate
RYR1	NM_000540.3(RYR1):c.6961A>G (p.Ile2321Val)	Benign	0	-1	Domain-aggregate
RYR1	NM_000540.2(RYR1):c.131G>A (p.Arg44His)	Uncertain Significance	2	2	Domain-aggregate
RYR1	NM_000540.3(RYR1):c.1202G>T (p.Arg401Leu)	Likely Pathogenic	2	3	Domain-aggregate
RYR1	NM_000540.2(RYR1):c.14197T>G (p.Tyr4733Asp)	Uncertain Significance	0	2	Domain-aggregate
RYR1	NM_000540.2(RYR1):c.7487C>T (p.Pro2496Leu)	Uncertain Significance	2	3	Domain-aggregate
RYR1	NM_000540.2(RYR1):c.14818G>A (p.Ala4940Thr)	Uncertain Significance	2	0	Domain-aggregate
RYR1	NM_000540.2(RYR1):c.463C>A (p.Gln155Lys)	Likely Pathogenic	2	2	Domain-aggregate
RYR1	NM_000540.2(RYR1):c.7358T>C (p.Ile2453Thr)	Likely Pathogenic	2	3	Domain-aggregate
RYR1	NM_000540.2(RYR1):c.455C>A (p.Ala152Asp)	Uncertain Significance	2	1	Domain-aggregate
RYR1	NM_000540.3(RYR1):c.212C>A (p.Ser71Tyr)	Uncertain Significance	2	2	Domain-aggregate
RYR1	NM_000540.2(RYR1):c.13913G>A (p.Gly4638Asp)	Uncertain Significance	2	3	Domain-aggregate
RYR1	NM_000540.2(RYR1):c.14458G>A (p.Gly4820Arg)	Uncertain Significance	0	0	Domain-aggregate
RYR1	NM_000540.2(RYR1):c.14051T>C (p.Phe4684Ser)	Uncertain Significance	2	4	Domain-aggregate
RYR1	NM_000540.2(RYR1):c.14209C>T (p.Arg4737Trp)	Likely Pathogenic	2	3	Domain-aggregate
RYR1	NM_000540.2(RYR1):c.1553T>C (p.Val518Ala)	Uncertain Significance	0	0	Domain-aggregate
RYR1	NM_000540.2(RYR1):c.6635T>A (p.Val2212Asp)	Uncertain Significance	2	2	Domain-aggregate
RYR1	NM_000540.2(RYR1):c.625G>A (p.Glu209Lys)	Uncertain Significance	0	0	Domain-aggregate
RYR1	NM_000540.2(RYR1):c.6757C>T (p.His2253Tyr)	Uncertain Significance	2	2	Domain-aggregate
RYR1	NM_000540.2(RYR1):c.641C>T (p.Thr214Met)	Uncertain Significance	0	-1	Domain-aggregate
RYR1	NM_000540.2(RYR1):c.7060G>A (p.Val2354Met)	Likely Pathogenic	2	0	Domain-aggregate
RYR1	NM_000540.2(RYR1):c.3127C>T (p.Arg1043Cys)	Uncertain Significance	2	2	Domain-aggregate
RYR1	NM_000540.2(RYR1):c.6388G>A (p.Gly2130Arg)	Uncertain Significance	2	3	Domain-aggregate
RYR1	NM_000540.2(RYR1):c.11708G>A (p.Arg3903Gln)	Likely Pathogenic	2	2	Domain-aggregate
RYR1	NM_000540.2(RYR1):c.6302T>A (p.Met2101Lys)	Uncertain Significance	-1	0	Domain-aggregate
RYR1	NM_000540.2(RYR1):c.7099G>A (p.Ala2367Thr)	Uncertain Significance	2	1	Domain-aggregate
RYR1	NM_000540.2(RYR1):c.8188G>C (p.Asp2730His)	Uncertain Significance	2	3	Domain-aggregate
RYR1	NM_000540.2(RYR1):c.652G>A (p.Val218Ile)	Uncertain Significance	0	0	Domain-aggregate
RYR1	NM_000540.3(RYR1):c.1201C>G (p.Arg401Gly)	Uncertain Significance	2	3	Domain-aggregate
RYR1	NM_000540.3(RYR1):c.14512C>G (p.Leu4838Val)	Likely Pathogenic	2	0	Domain-aggregate
RYR1	NM_000540.3(RYR1):c.14497C>T (p.His4833Tyr)	Likely Pathogenic	2	2	Domain-aggregate
RYR1	NM_000540.2(RYR1):c.1422G>T (p.Gln474His)	Uncertain Significance	0	0	Domain-aggregate
RYR1	NM_000540.2(RYR1):c.12553G>A (p.Ala4185Thr)	Uncertain Significance	-1	0	Domain-aggregate
RYR1	NM_000540.2(RYR1):c.11958C>G (p.Asp3986Glu)	Uncertain Significance	0	0	Domain-aggregate
RYR1	NM_000540.3(RYR1):c.11969G>T (p.Gly3990Val)	Pathogenic	0	0	Domain-aggregate
RYR1	NM_000540.3(RYR1):c.14477C>T (p.Thr4826Ile)	Pathogenic	2	2	Domain-aggregate
RYR1	NM_000540.3(RYR1):c.7360C>T (p.Arg2454Cys)	Pathogenic	2	3	Domain-aggregate
RYR1	NM_000540.3(RYR1):c.6502G>A (p.Val2168Met)	Pathogenic	2	1	Domain-aggregate
RYR1	NM_000540.2(RYR1):c.1021G>C (p.Gly341Arg)	Pathogenic	2	1	Domain-aggregate
RYR1	NM_000540.2(RYR1):c.11798A>G (p.Tyr3933Cys)	Likely Benign	2	2	Domain-aggregate
RYR1	NM_000540.2(RYR1):c.1202G>A (p.Arg401His)	Pathogenic	2	3	Domain-aggregate
RYR1	NM_000540.2(RYR1):c.2797G>A (p.Ala933Thr)	Benign	0	1	Domain-aggregate
RYR1	NM_000540.3(RYR1):c.103T>C (p.Cys35Arg)	Pathogenic	2	2	Domain-aggregate
RYR1	NM_000540.3(RYR1):c.4711A>G (p.Ile1571Val)	Likely Benign	0	0	Domain-aggregate
RYR1	NM_000540.3(RYR1):c.5036G>A (p.Arg1679His)	Likely Benign	2	3	Domain-aggregate
RYR1	NM_000540.3(RYR1):c.7025A>G (p.Asn2342Ser)	Benign	0	-2	Domain-aggregate
MLH1	NM_000249.4(MLH1):c.2041G>C (p.Ala681Pro)	Uncertain Significance	0	0	Domain-aggregate
MLH1	NM_000249.4(MLH1):c.1889T>A (p.Ile630Asn)	Uncertain Significance	2	2	Domain-aggregate
MLH1	NM_000249.4(MLH1):c.2042C>T (p.Ala681Val)	Uncertain Significance	0	0	Domain-aggregate
MLH1	NM_000249.4(MLH1):c.1963A>T (p.Ile655Phe)	Uncertain Significance	-1	-3	Domain-aggregate
MLH1	NM_000249.4(MLH1):c.2074T>C (p.Ser692Pro)	Likely Benign	-1	-3	Domain-aggregate
MLH1	NM_000249.4(MLH1):c.923A>C (p.His308Pro)	Pathogenic	2	2	Domain-aggregate
MLH1	NM_000249.4(MLH1):c.649C>T (p.Arg217Cys)	Benign	0	0	Domain-aggregate
MLH1	NM_000249.4(MLH1):c.1646T>C (p.Leu549Pro)	Likely Pathogenic	2	1	Domain-aggregate
MLH1	NM_000249.4(MLH1):c.1270G>A (p.Ala424Thr)	Uncertain Significance	-1	0	Domain-aggregate
HNF4A	NM_175914.5(HNF4A):c.956T>C (p.Leu319Pro)	Pathogenic	1	2	Domain-aggregate
HNF4A	NM_175914.5(HNF4A):c.1052T>G (p.Met351Arg)	Likely Pathogenic	1	3	Domain-aggregate
HNF4A	NM_175914.5(HNF4A):c.768G>C (p.Glu256Asp)	Uncertain Significance	0	-4	Domain-aggregate
HNF4A	NM_175914.5(HNF4A):c.932G>A (p.Arg311His)	Pathogenic	1	1	Domain-aggregate
HNF4A	NM_175914.5(HNF4A):c.1309C>A (p.Pro437Thr)	Uncertain Significance	-1	-2	Domain-aggregate
HNF4A	NM_175914.5(HNF4A):c.422G>A (p.Arg141Gln)	Uncertain Significance	0	0	Domain-aggregate
HNF4A	NM_175914.5(HNF4A):c.427A>G (p.Ile143Val)	Uncertain Significance	0	0	Domain-aggregate
HNF4A	NM_175914.5(HNF4A):c.553G>C (p.Ala185Pro)	Uncertain Significance	0	-1	Domain-aggregate
HNF4A	NM_175914.5(HNF4A):c.640T>A (p.Ser214Thr)	Uncertain Significance	1	2	Domain-aggregate
HNF4A	NM_175914.5(HNF4A):c.188G>A (p.Arg63Gln)	Pathogenic	1	0	Domain-aggregate
HNF4A	NM_175914.5(HNF4A):c.733C>T (p.Arg245Cys)	Pathogenic	1	1	Domain-aggregate
HNF4A	NM_175914.5(HNF4A):c.1033G>T (p.Asp345Tyr)	Likely Pathogenic	1	3	Domain-aggregate
HNF4A	NM_175914.5(HNF4A):c.1138G>A (p.Val380Ile)	Uncertain Significance	0	-1	Domain-aggregate
HNF4A	NM_175914.5(HNF4A):c.763C>G (p.Gln255Glu)	Uncertain Significance	1	0	Domain-aggregate
HNF4A	NM_175914.5(HNF4A):c.481A>G (p.Ser161Gly)	Uncertain Significance	0	-4	Domain-aggregate
HNF4A	NM_175914.5(HNF4A):c.224G>A (p.Arg75Lys)	Uncertain Significance	1	-1	Domain-aggregate
HNF4A	NM_175914.5(HNF4A):c.334C>T (p.Arg112Trp)	Pathogenic	1	3	Domain-aggregate
HNF4A	NM_175914.5(HNF4A):c.2T>C (p.Met1Thr)	Likely Pathogenic	0	0	Domain-aggregate
HNF4A	NM_175914.5(HNF4A):c.589C>A (p.Leu197Met)	Uncertain Significance	1	1	Domain-aggregate
HNF4A	NM_175914.5(HNF4A):c.1303G>A (p.Val435Ile)	Uncertain Significance	-1	-2	Domain-aggregate
HNF4A	NM_175914.5(HNF4A):c.341G>A (p.Arg114Gln)	Uncertain Significance	1	3	Domain-aggregate
HNF4A	NM_175914.5(HNF4A):c.7A>C (p.Ser3Arg)	Uncertain Significance	0	-1	Domain-aggregate
HNF4A	NM_175914.5(HNF4A):c.1097C>G (p.Pro366Arg)	Uncertain Significance	0	-2	Domain-aggregate
HNF4A	NM_175914.5(HNF4A):c.925C>A (p.Arg309Ser)	Uncertain Significance	1	0	Domain-aggregate
HNF4A	NM_175914.5(HNF4A):c.932G>T (p.Arg311Leu)	Likely Pathogenic	1	2	Domain-aggregate
HNF4A	NM_175914.5(HNF4A):c.931C>T (p.Arg311Cys)	Pathogenic	1	2	Domain-aggregate
HNF4A	NM_175914.5(HNF4A):c.3G>A (p.Met1Ile)	Likely Pathogenic	0	1	Domain-aggregate
HNF4A	NM_175914.5(HNF4A):c.593T>G (p.Leu198Arg)	Uncertain Significance	1	2	Domain-aggregate
HNF4A	NM_175914.5(HNF4A):c.335G>A (p.Arg112Gln)	Pathogenic	1	3	Domain-aggregate
HNF4A	NM_175914.5(HNF4A):c.530T>C (p.Val177Ala)	Uncertain Significance	1	2	Domain-aggregate
HNF4A	NM_175914.5(HNF4A):c.1267C>T (p.Pro423Ser)	Uncertain Significance	-1	-3	Domain-aggregate
HNF4A	NM_175914.5(HNF4A):c.740T>C (p.Leu247Pro)	Pathogenic	1	2	Domain-aggregate
HNF4A	NM_175914.5(HNF4A):c.926G>A (p.Arg309His)	Likely Pathogenic	1	0	Domain-aggregate
HNF4A	NM_175914.5(HNF4A):c.454G>A (p.Gly152Ser)	Uncertain Significance	0	-1	Domain-aggregate
HNF4A	NM_175914.5(HNF4A):c.195C>A (p.Ser65Arg)	Uncertain Significance	1	2	Domain-aggregate
HNF4A	NM_175914.5(HNF4A):c.221G>A (p.Cys74Tyr)	Likely Pathogenic	1	2	Domain-aggregate
HNF4A	NM_175914.5(HNF4A):c.869G>A (p.Arg290His)	Pathogenic	1	1	Domain-aggregate
HNF4A	NM_175914.5(HNF4A):c.1127T>G (p.Met376Arg)	Uncertain Significance	0	-1	Domain-aggregate
HNF4A	NM_175914.5(HNF4A):c.778G>T (p.Asp260Tyr)	Likely Pathogenic	1	1	Domain-aggregate
HNF4A	NM_175914.5(HNF4A):c.724G>A (p.Val242Met)	Benign	1	0	Domain-aggregate
HNF4A	NM_175914.5(HNF4A):c.953T>A (p.Leu318Gln)	Uncertain Significance	1	1	Domain-aggregate
HNF4A	NM_175914.5(HNF4A):c.691C>T (p.Arg231Trp)	Likely Pathogenic	1	1	Domain-aggregate
HNF4A	NM_175914.5(HNF4A):c.187C>T (p.Arg63Trp)	Pathogenic	1	1	Domain-aggregate
HNF4A	NM_175914.5(HNF4A):c.200G>A (p.Arg67Gln)	Pathogenic	1	1	Domain-aggregate
HNF4A	NM_175914.5(HNF4A):c.925C>T (p.Arg309Cys)	Pathogenic	1	0	Domain-aggregate
HNF4A	NM_175914.5(HNF4A):c.590T>C (p.Leu197Pro)	Uncertain Significance	1	2	Domain-aggregate
HNF4A	NM_175914.5(HNF4A):c.305G>A (p.Gly102Asp)	Uncertain Significance	1	1	Domain-aggregate
HNF4A	NM_175914.5(HNF4A):c.322G>A (p.Val108Ile)	Pathogenic	1	2	Domain-aggregate
HNF4A	NM_175914.5(HNF4A):c.502T>C (p.Ser168Pro)	Uncertain Significance	1	2	Domain-aggregate
HNF4A	NM_175914.5(HNF4A):c.789G>C (p.Glu263Asp)	Uncertain Significance	1	0	Domain-aggregate
HNF4A	NM_175914.5(HNF4A):c.1177G>A (p.Gly393Arg)	Benign	0	0	Domain-aggregate
HNF4A	NM_175914.5(HNF4A):c.881A>G (p.Gln294Arg)	Uncertain Significance	1	2	Domain-aggregate
HNF4A	NM_175914.5(HNF4A):c.361A>G (p.Ser121Gly)	Likely Benign	0	0	Domain-aggregate
HNF4A	NM_175914.5(HNF4A):c.787G>C (p.Glu263Gln)	Likely Pathogenic	1	2	Domain-aggregate
HNF4A	NM_175914.5(HNF4A):c.1187G>C (p.Cys396Ser)	Uncertain Significance	0	0	Domain-aggregate
HNF4A	NM_175914.5(HNF4A):c.457G>A (p.Asp153Asn)	Uncertain Significance	0	0	Domain-aggregate
HNF4A	NM_175914.5(HNF4A):c.537G>C (p.Trp179Cys)	Likely Pathogenic	1	1	Domain-aggregate
HNF4A	NM_175914.5(HNF4A):c.1199G>A (p.Arg400Gln)	Likely Benign	-1	-3	Domain-aggregate
HNF4A	NM_175914.5(HNF4A):c.1321A>G (p.Ile441Val)	Benign	0	0	Domain-aggregate
HNF4A	NM_175914.5(HNF4A):c.233G>A (p.Arg78Gln)	Uncertain Significance	1	-1	Domain-aggregate
HNF4A	NM_175914.5(HNF4A):c.917A>G (p.Tyr306Cys)	Uncertain Significance	1	0	Domain-aggregate
KRAS	NM_004985.4(KRAS):c.101C>T (p.Pro34Leu)	Pathogenic	1	1	Domain-aggregate
KRAS	NM_033360.4(KRAS):c.15A>T (p.Lys5Asn)	Pathogenic	1	0	Domain-aggregate
KRAS	NM_004985.5(KRAS):c.40G>A (p.Val14Ile)	Pathogenic	1	0	Domain-aggregate
KRAS	NM_004985.4(KRAS):c.173C>T (p.Thr58Ile)	Pathogenic	1	1	Domain-aggregate
KRAS	NM_033360.4(KRAS):c.194G>T (p.Ser65Ile)	Likely Pathogenic	0	0	Domain-aggregate
KRAS	NM_004985.5(KRAS):c.65A>G (p.Gln22Arg)	Pathogenic	1	0	Domain-aggregate
RRAS2	NM_012250.6(RRAS2):c.215A>T (p.Gln72Leu)	Pathogenic	1	2	Domain-aggregate
RRAS2	NM_012250.6(RRAS2):c.68G>T (p.Gly23Val)	Pathogenic	0	0	Domain-aggregate
RRAS2	NM_012250.6(RRAS2):c.208G>A (p.Ala70Thr)	Likely Pathogenic	1	0	Domain-aggregate
PTEN	NM_000314.8(PTEN):c.424C>T (p.Arg142Trp)	Uncertain Significance	1	2	Domain-aggregate
PTEN	NM_000314.8(PTEN):c.287C>T (p.Pro96Leu)	Likely Pathogenic	1	3	Domain-aggregate
PTEN	NM_000314.7(PTEN):c.1093G>A (p.Val365Ile)	Uncertain Significance	-1	0	Domain-aggregate
PTEN	NM_000314.8(PTEN):c.1061C>A (p.Pro354Gln)	Likely Benign	-1	0	Domain-aggregate
PTEN	NM_000314.6(PTEN):c.740T>C (p.Leu247Ser)	Likely Pathogenic	1	2	Domain-aggregate
PTEN	NM_000314.8(PTEN):c.10A>G (p.Ile4Val)	Uncertain Significance	-1	-1	Domain-aggregate
PTEN	NM_000314.8(PTEN):c.44G>C (p.Arg15Thr)	Likely Pathogenic	1	3	Domain-aggregate
PTEN	NM_000314.8(PTEN):c.80A>C (p.Tyr27Ser)	Likely Pathogenic	1	3	Domain-aggregate
PTEN	NM_000314.6(PTEN):c.841C>G (p.Pro281Ala)	Uncertain Significance	0	0	Domain-aggregate
PTEN	NM_000314.6(PTEN):c.389G>A (p.Arg130Gln)	Pathogenic	0	4	Domain-aggregate
PTEN	NM_000314.6(PTEN):c.44G>A (p.Arg15Lys)	Likely Pathogenic	0	2	Domain-aggregate
PTEN	NM_000314.6(PTEN):c.722T>C (p.Phe241Ser)	Likely Pathogenic	1	1	Domain-aggregate
PTEN	NM_000314.6(PTEN):c.715A>G (p.Met239Val)	Uncertain Significance	-1	-2	Domain-aggregate
PTEN	NM_000314.8(PTEN):c.882T>G (p.Ser294Arg)	Likely Benign	-1	-3	Domain-aggregate
PTEN	NM_000314.8(PTEN):c.892C>G (p.Gln298Glu)	Likely Benign	-1	-3	Domain-aggregate
PTEN	NM_000314.8(PTEN):c.59G>T (p.Gly20Val)	Likely Pathogenic	1	3	Domain-aggregate
PTEN	NM_000314.8(PTEN):c.64G>C (p.Asp22His)	Likely Pathogenic	1	3	Domain-aggregate
PTEN	NM_000314.8(PTEN):c.80A>G (p.Tyr27Cys)	Likely Pathogenic	1	4	Domain-aggregate
PTEN	NM_000314.8(PTEN):c.1061C>T (p.Pro354Leu)	Uncertain Significance	-1	0	Domain-aggregate
PTEN	NM_000314.8(PTEN):c.140G>A (p.Arg47Lys)	Likely Pathogenic	1	3	Domain-aggregate
PTEN	NM_000314.6(PTEN):c.755A>G (p.Asp252Gly)	Pathogenic	1	2	Domain-aggregate
PTEN	NM_000314.8(PTEN):c.830C>T (p.Thr277Ile)	Pathogenic	1	2	Domain-aggregate
PTEN	NM_000314.8(PTEN):c.35A>G (p.Asn12Ser)	Uncertain Significance	-1	-1	Domain-aggregate
PTEN	NM_000314.8(PTEN):c.46T>C (p.Tyr16His)	Uncertain Significance	1	3	Domain-aggregate
PTEN	NM_000314.8(PTEN):c.283C>A (p.Pro95Thr)	Uncertain Significance	1	3	Domain-aggregate
PTEN	NM_000314.8(PTEN):c.149T>C (p.Ile50Thr)	Pathogenic	1	4	Domain-aggregate
PTEN	NM_000314.8(PTEN):c.49C>G (p.Gln17Glu)	Uncertain Significance	-1	0	Domain-aggregate
PTEN	NM_000314.8(PTEN):c.521A>G (p.Tyr174Cys)	Likely Pathogenic	1	4	Domain-aggregate
PTEN	NM_000314.8(PTEN):c.500C>A (p.Thr167Asn)	Likely Pathogenic	1	2	Domain-aggregate
PTEN	NM_000314.7(PTEN):c.610C>G (p.Pro204Ala)	Pathogenic	1	1	Domain-aggregate
PTEN	NM_000314.8(PTEN):c.107G>A (p.Gly36Glu)	Pathogenic	1	4	Domain-aggregate
PTEN	NM_000314.6(PTEN):c.698G>A (p.Arg233Gln)	Uncertain Significance	0	-1	Domain-aggregate
PTEN	NM_000314.8(PTEN):c.359C>A (p.Ala120Glu)	Uncertain Significance	1	3	Domain-aggregate
PTEN	NM_000314.7(PTEN):c.947T>C (p.Leu316Pro)	Likely Pathogenic	1	0	Domain-aggregate
PTEN	NM_000314.8(PTEN):c.212G>A (p.Cys71Tyr)	Pathogenic	1	3	Domain-aggregate
PTEN	NM_000314.8(PTEN):c.198G>T (p.Lys66Asn)	Likely Pathogenic	1	2	Domain-aggregate
PTEN	NM_000314.8(PTEN):c.278A>C (p.His93Pro)	Likely Pathogenic	1	4	Domain-aggregate
PTEN	NM_000314.7(PTEN):c.112C>T (p.Pro38Ser)	Uncertain Significance	1	3	Domain-aggregate
PTEN	NM_000314.6(PTEN):c.545T>C (p.Leu182Ser)	Uncertain Significance	1	4	Domain-aggregate
PTEN	NM_000314.8(PTEN):c.182A>G (p.His61Arg)	Likely Pathogenic	1	4	Domain-aggregate
PTEN	NM_000314.8(PTEN):c.338G>T (p.Ser113Ile)	Uncertain Significance	1	2	Domain-aggregate
PTEN	NM_000314.6(PTEN):c.701G>A (p.Arg234Gln)	Uncertain Significance	0	0	Domain-aggregate
PTEN	NM_000314.8(PTEN):c.40A>G (p.Arg14Gly)	Uncertain Significance	1	2	Domain-aggregate
PTEN	NM_000314.6(PTEN):c.700C>T (p.Arg234Trp)	Uncertain Significance	0	0	Domain-aggregate
PTEN	NM_000314.6(PTEN):c.209T>C (p.Leu70Pro)	Likely Pathogenic	0	4	Domain-aggregate
PTEN	NM_000314.8(PTEN):c.344A>G (p.Asp115Gly)	Uncertain Significance	0	1	Domain-aggregate
PTEN	NM_000314.8(PTEN):c.1034T>C (p.Leu345Pro)	Pathogenic	0	1	Domain-aggregate
PTEN	NM_000314.6(PTEN):c.510T>A (p.Ser170Arg)	Pathogenic	0	4	Domain-aggregate
PTEN	NM_000314.7(PTEN):c.464A>G (p.Tyr155Cys)	Pathogenic	0	4	Domain-aggregate
PTEN	NM_000314.7(PTEN):c.367C>G (p.His123Asp)	Pathogenic	0	4	Domain-aggregate
PTEN	NM_000314.6(PTEN):c.388C>G (p.Arg130Gly)	Pathogenic	0	3	Domain-aggregate
PTEN	NM_000314.6(PTEN):c.331T>C (p.Trp111Arg)	Likely Pathogenic	0	3	Domain-aggregate
PTEN	NM_000314.6(PTEN):c.304A>C (p.Lys102Gln)	Uncertain Significance	0	1	Domain-aggregate
PTEN	NM_000314.6(PTEN):c.1171C>T (p.Pro391Ser)	Uncertain Significance	0	0	Domain-aggregate
PTEN	NM_000314.6(PTEN):c.517C>T (p.Arg173Cys)	Pathogenic	0	4	Domain-aggregate
PTEN	NM_000314.6(PTEN):c.392C>T (p.Thr131Ile)	Pathogenic	0	3	Domain-aggregate
PTEN	NM_000314.6(PTEN):c.278A>G (p.His93Arg)	Pathogenic	0	4	Domain-aggregate
PTEN	NM_000314.8(PTEN):c.408T>G (p.Cys136Trp)	Pathogenic	1	3	Domain-aggregate
PTEN	NM_000314.6(PTEN):c.181C>G (p.His61Asp)	Likely Pathogenic	0	3	Domain-aggregate
PTEN	NM_000314.6(PTEN):c.314G>A (p.Cys105Tyr)	Likely Pathogenic	0	3	Domain-aggregate
PTEN	NM_000314.7(PTEN):c.838A>G (p.Ile280Val)	Uncertain Significance	0	-3	Domain-aggregate
PTEN	NM_000314.8(PTEN):c.16A>G (p.Lys6Glu)	Pathogenic	0	3	Domain-aggregate
PTEN	NM_000314.6(PTEN):c.395G>A (p.Gly132Asp)	Pathogenic	0	4	Domain-aggregate
PTEN	NM_000314.6(PTEN):c.170T>G (p.Leu57Trp)	Likely Pathogenic	0	3	Domain-aggregate
PTEN	NM_000314.7(PTEN):c.493G>A (p.Gly165Arg)	Pathogenic	0	3	Domain-aggregate
PTEN	NM_000314.6(PTEN):c.370T>C (p.Cys124Arg)	Pathogenic	0	3	Domain-aggregate
PTEN	NM_000314.6(PTEN):c.320A>T (p.Asp107Val)	Pathogenic	0	3	Domain-aggregate
PTEN	NM_000314.6(PTEN):c.914G>A (p.Ser305Asn)	Uncertain Significance	0	-3	Domain-aggregate
PTEN	NM_000314.6(PTEN):c.235G>A (p.Ala79Thr)	Likely Benign	0	0	Domain-aggregate
PTEN	NM_000314.7(PTEN):c.633C>G (p.Cys211Trp)	Pathogenic	0	1	Domain-aggregate
PTEN	NM_000314.6(PTEN):c.520T>A (p.Tyr174Asn)	Likely Pathogenic	0	3	Domain-aggregate
PTEN	NM_000314.7(PTEN):c.830C>G (p.Thr277Arg)	Likely Pathogenic	0	2	Domain-aggregate
PTEN	NM_000314.7(PTEN):c.599T>C (p.Phe200Ser)	Uncertain Significance	0	1	Domain-aggregate
PTEN	NM_000314.6(PTEN):c.284C>T (p.Pro95Leu)	Pathogenic	0	3	Domain-aggregate
PTEN	NM_000314.6(PTEN):c.737C>T (p.Pro246Leu)	Pathogenic	0	1	Domain-aggregate
PTEN	NM_000314.6(PTEN):c.364A>G (p.Ile122Val)	Uncertain Significance	0	0	Domain-aggregate
PTEN	NM_000314.8(PTEN):c.542T>C (p.Leu181Pro)	Pathogenic	0	4	Domain-aggregate
PTEN	NM_000314.8(PTEN):c.402G>C (p.Met134Ile)	Likely Pathogenic	0	3	Domain-aggregate
PTEN	NM_000314.7(PTEN):c.422A>C (p.His141Pro)	Likely Pathogenic	0	3	Domain-aggregate
PTEN	NM_000314.7(PTEN):c.319G>T (p.Asp107Tyr)	Pathogenic	0	2	Domain-aggregate
PTEN	NM_000314.6(PTEN):c.368A>G (p.His123Arg)	Pathogenic	0	4	Domain-aggregate
PTEN	NM_000314.7(PTEN):c.389G>C (p.Arg130Pro)	Pathogenic	0	4	Domain-aggregate
PTEN	NM_000314.6(PTEN):c.407G>A (p.Cys136Tyr)	Pathogenic	0	4	Domain-aggregate
PTEN	NM_000314.8(PTEN):c.355G>T (p.Val119Phe)	Likely Pathogenic	1	3	Domain-aggregate
PTEN	NM_000314.8(PTEN):c.373A>G (p.Lys125Glu)	Pathogenic	1	3	Domain-aggregate
PTEN	NM_000314.8(PTEN):c.752G>T (p.Gly251Val)	Likely Pathogenic	1	2	Domain-aggregate
MRAS	NM_001085049.3(MRAS):c.212A>G (p.Gln71Arg)	Likely Pathogenic	1	2	Domain-aggregate
RAG1	NM_000448.3(RAG1):c.17C>T (p.Pro6Leu)	Uncertain Significance	0	-2	Domain-aggregate
RAG1	NM_000448.3(RAG1):c.82T>C (p.Trp28Arg)	Uncertain Significance	0	1	Domain-aggregate
RAG1	NM_000448.3(RAG1):c.1573C>T (p.Pro525Ser)	Benign	0	0	Domain-aggregate
RAG1	NM_000448.3(RAG1):c.527G>T (p.Cys176Phe)	Uncertain Significance	0	1	Domain-aggregate
RAG1	NM_000448.3(RAG1):c.2095C>T (p.Arg699Trp)	Likely Pathogenic	0	1	Domain-aggregate
RAG1	NM_000448.3(RAG1):c.40G>A (p.Ala14Thr)	Uncertain Significance	0	-2	Domain-aggregate
RAG1	NM_000448.3(RAG1):c.1088G>A (p.Cys363Tyr)	Uncertain Significance	0	3	Domain-aggregate
RAG1	NM_000448.3(RAG1):c.2442G>T (p.Glu814Asp)	Uncertain Significance	0	1	Domain-aggregate
RAG1	NM_000448.3(RAG1):c.2904C>A (p.Asn968Lys)	Uncertain Significance	0	0	Domain-aggregate
RAG1	NM_000448.3(RAG1):c.15C>G (p.Phe5Leu)	Uncertain Significance	0	-2	Domain-aggregate
RAG1	NM_000448.3(RAG1):c.2291G>A (p.Arg764His)	Uncertain Significance	0	2	Domain-aggregate
RAG1	NM_000448.3(RAG1):c.2603C>T (p.Ala868Val)	Uncertain Significance	0	-1	Domain-aggregate
RAG1	NM_000448.3(RAG1):c.725A>G (p.Gln242Arg)	Likely Benign	0	-3	Domain-aggregate
RAG1	NM_000448.3(RAG1):c.906C>A (p.Asp302Glu)	Benign	0	-2	Domain-aggregate
RAG1	NM_000448.3(RAG1):c.1331C>T (p.Ala444Val)	Pathogenic	0	0	Domain-aggregate
RAG1	NM_000448.3(RAG1):c.29G>T (p.Gly10Val)	Uncertain Significance	0	-2	Domain-aggregate
RAG1	NM_000448.3(RAG1):c.86A>G (p.Lys29Arg)	Uncertain Significance	0	1	Domain-aggregate
RAG1	NM_000448.3(RAG1):c.486T>A (p.Asp162Glu)	Likely Benign	0	1	Domain-aggregate
RAG1	NM_000448.3(RAG1):c.251A>G (p.His84Arg)	Benign	0	-2	Domain-aggregate
RAG1	NM_000448.3(RAG1):c.2638G>A (p.Glu880Lys)	Benign	0	0	Domain-aggregate
RAG1	NM_000448.3(RAG1):c.2690G>A (p.Arg897Gln)	Uncertain Significance	0	1	Domain-aggregate
RAG1	NM_000448.3(RAG1):c.76T>C (p.Ser26Pro)	Uncertain Significance	0	1	Domain-aggregate
RAG1	NM_000448.3(RAG1):c.577G>A (p.Glu193Lys)	Benign	0	-1	Domain-aggregate
MAP2K1	NM_002755.4(MAP2K1):c.275T>G (p.Leu92Arg)	Pathogenic	1	1	Domain-aggregate
MAP2K1	NM_002755.3(MAP2K1):c.389A>G (p.Tyr130Cys)	Pathogenic	1	2	Domain-aggregate
MAP2K1	NM_002755.4(MAP2K1):c.169A>C (p.Lys57Gln)	Pathogenic	1	2	Domain-aggregate
MAP2K1	NM_002755.3(MAP2K1):c.370C>T (p.Pro124Ser)	Pathogenic	1	2	Domain-aggregate
MAP2K1	NM_002755.3(MAP2K1):c.364A>G (p.Asn122Asp)	Pathogenic	0	0	Domain-aggregate
MAP2K1	NM_002755.3(MAP2K1):c.848C>T (p.Ala283Val)	Benign	0	-3	Domain-aggregate
MAP2K1	NM_002755.3(MAP2K1):c.323G>T (p.Arg108Leu)	Pathogenic	1	1	Domain-aggregate
MAP2K1	NM_002755.3(MAP2K1):c.388T>C (p.Tyr130His)	Pathogenic	1	2	Domain-aggregate
MAP2K1	NM_002755.3(MAP2K1):c.199G>A (p.Asp67Asn)	Pathogenic	1	2	Domain-aggregate
PMS2	NM_000535.7(PMS2):c.614A>C (p.Gln205Pro)	Uncertain Significance	1	2	Domain-aggregate
PMS2	NM_000535.7(PMS2):c.1753C>A (p.Leu585Ile)	Uncertain Significance	-1	-3	Domain-aggregate
IL7R	NM_002185.5(IL7R):c.662G>T (p.Ser221Ile)	Pathogenic	0	3	Domain-aggregate
IL7R	NM_002185.5(IL7R):c.212T>C (p.Phe71Ser)	Uncertain Significance	0	1	Domain-aggregate
IL7R	NM_002185.5(IL7R):c.135G>C (p.Gln45His)	Uncertain Significance	0	2	Domain-aggregate
IL7R	NM_002185.5(IL7R):c.41T>C (p.Leu14Ser)	Uncertain Significance	0	1	Domain-aggregate
IL7R	NM_002185.5(IL7R):c.1241C>T (p.Thr414Met)	Benign	0	-2	Domain-aggregate
IL7R	NM_002185.5(IL7R):c.353G>A (p.Cys118Tyr)	Pathogenic	0	0	Domain-aggregate
IL7R	NM_002185.5(IL7R):c.314G>A (p.Ser105Asn)	Likely Benign	0	0	Domain-aggregate
IL7R	NM_002185.5(IL7R):c.339A>C (p.Glu113Asp)	Likely Benign	0	-1	Domain-aggregate
IL7R	NM_002185.5(IL7R):c.1092T>G (p.Asp364Glu)	Benign	0	-3	Domain-aggregate
IL7R	NM_002185.5(IL7R):c.553A>T (p.Ser185Cys)	Uncertain Significance	0	-2	Domain-aggregate
IL7R	NM_002185.5(IL7R):c.707G>A (p.Gly236Glu)	Uncertain Significance	0	-1	Domain-aggregate
IL7R	NM_002185.5(IL7R):c.205C>G (p.Leu69Val)	Uncertain Significance	0	-1	Domain-aggregate
IL7R	NM_002185.5(IL7R):c.1231A>G (p.Thr411Ala)	Likely Benign	0	-3	Domain-aggregate
IL7R	NM_002185.5(IL7R):c.778G>A (p.Ala260Thr)	Likely Benign	0	-2	Domain-aggregate
IL7R	NM_002185.5(IL7R):c.602A>G (p.Tyr201Cys)	Likely Benign	0	2	Domain-aggregate
IL7R	NM_002185.5(IL7R):c.394C>T (p.Pro132Ser)	Likely Pathogenic	0	2	Domain-aggregate
IL7R	NM_002185.5(IL7R):c.152C>T (p.Ser51Leu)	Likely Benign	0	-1	Domain-aggregate
IL7R	NM_002185.5(IL7R):c.554G>T (p.Ser185Ile)	Uncertain Significance	0	-3	Domain-aggregate
SCN1A	NM_001165963.4(SCN1A):c.83G>A (p.Arg28His)	Likely Benign	2	3	Domain-aggregate
SCN1A	NM_001165963.4(SCN1A):c.1678C>T (p.Arg560Cys)	Likely Benign	2	1	Domain-aggregate
SCN1A	NM_001165963.4(SCN1A):c.2303C>T (p.Pro768Leu)	Likely Pathogenic	2	3	Domain-aggregate
SCN1A	NM_001165963.4(SCN1A):c.3629C>T (p.Thr1210Met)	Likely Pathogenic	2	2	Domain-aggregate
SCN1A	NM_001165963.4(SCN1A):c.1709G>A (p.Ser570Asn)	Likely Pathogenic	2	1	Domain-aggregate
SCN8A	NM_001330260.2(SCN8A):c.5615G>A (p.Arg1872Gln)	Pathogenic	2	3	Domain-aggregate
SCN8A	NM_001330260.2(SCN8A):c.4687A>G (p.Ile1563Val)	Benign	0	-4	Domain-aggregate
SCN8A	NM_001330260.2(SCN8A):c.4590G>A (p.Met1530Ile)	Benign	0	-4	Domain-aggregate
RPE65	NM_000329.3(RPE65):c.124C>T (p.Leu42Phe)	Likely Pathogenic	2	2	Domain-aggregate
RPE65	NM_000329.3(RPE65):c.484A>C (p.Thr162Pro)	Likely Pathogenic	2	2	Domain-aggregate
RPE65	NM_000329.3(RPE65):c.302C>T (p.Thr101Ile)	Likely Pathogenic	2	2	Domain-aggregate
RPE65	NM_000329.3(RPE65):c.329A>G (p.Asp110Gly)	Pathogenic	2	2	Domain-aggregate
RPE65	NM_000329.3(RPE65):c.845A>G (p.Asn282Ser)	Uncertain Significance	0	-3	Domain-aggregate
RPE65	NM_000329.3(RPE65):c.881A>C (p.Lys294Thr)	Likely Benign	2	3	Domain-aggregate
RPE65	NM_000329.3(RPE65):c.1103A>G (p.Tyr368Cys)	Likely Pathogenic	2	3	Domain-aggregate
RPE65	NM_000329.3(RPE65):c.200T>G (p.Leu67Arg)	Pathogenic	2	3	Domain-aggregate
RPE65	NM_000329.3(RPE65):c.975T>G (p.Ile325Met)	Uncertain Significance	0	-2	Domain-aggregate
RPE65	NM_000329.3(RPE65):c.65T>C (p.Leu22Pro)	Likely Pathogenic	1	0	Domain-aggregate
RPE65	NM_000329.3(RPE65):c.1597T>A (p.Ser533Thr)	Uncertain Significance	0	0	Domain-aggregate
RPE65	NM_000329.3(RPE65):c.982C>T (p.Leu328Phe)	Likely Pathogenic	1	0	Domain-aggregate
RPE65	NM_000329.3(RPE65):c.917C>T (p.Thr306Ile)	Likely Pathogenic	2	3	Domain-aggregate
RPE65	NM_000329.3(RPE65):c.430T>G (p.Tyr144Asp)	Likely Pathogenic	2	3	Domain-aggregate
RPE65	NM_000329.3(RPE65):c.242G>T (p.Arg81Ile)	Pathogenic	2	1	Domain-aggregate
RPE65	NM_000329.3(RPE65):c.545A>G (p.His182Arg)	Pathogenic	2	2	Domain-aggregate
RPE65	NM_000329.3(RPE65):c.74C>T (p.Pro25Leu)	Pathogenic	2	2	Domain-aggregate
RPE65	NM_000329.3(RPE65):c.755T>C (p.Phe252Ser)	Likely Pathogenic	2	3	Domain-aggregate
RPE65	NM_000329.3(RPE65):c.938A>G (p.His313Arg)	Pathogenic	2	3	Domain-aggregate
RPE65	NM_000329.3(RPE65):c.1102T>C (p.Tyr368His)	Pathogenic	2	3	Domain-aggregate
RPE65	NM_000329.3(RPE65):c.1543C>T (p.Arg515Trp)	Pathogenic	2	2	Domain-aggregate
RPE65	NM_000329.3(RPE65):c.1244C>T (p.Ala415Val)	Likely Pathogenic	2	0	Domain-aggregate
RPE65	NM_000329.3(RPE65):c.394G>A (p.Ala132Thr)	Benign	0	-1	Domain-aggregate
RPE65	NM_000329.3(RPE65):c.1040G>A (p.Arg347His)	Likely Pathogenic	0	0	Domain-aggregate
RPE65	NM_000329.3(RPE65):c.1399C>T (p.Pro467Ser)	Pathogenic	2	2	Domain-aggregate
RPE65	NM_000329.3(RPE65):c.314C>A (p.Thr105Asn)	Uncertain Significance	2	2	Domain-aggregate
RPE65	NM_000329.3(RPE65):c.565G>A (p.Val189Ile)	Uncertain Significance	0	-2	Domain-aggregate
RPE65	NM_000329.3(RPE65):c.419G>A (p.Gly140Glu)	Likely Pathogenic	2	1	Domain-aggregate
RPE65	NM_000329.3(RPE65):c.331C>A (p.Pro111Thr)	Likely Pathogenic	2	3	Domain-aggregate
RPE65	NM_000329.3(RPE65):c.1292A>G (p.Tyr431Cys)	Likely Pathogenic	2	2	Domain-aggregate
RPE65	NM_000329.3(RPE65):c.1087C>A (p.Pro363Thr)	Pathogenic	1	0	Domain-aggregate
RPE65	NM_000329.3(RPE65):c.1078G>C (p.Ala360Pro)	Likely Pathogenic	1	0	Domain-aggregate
RPE65	NM_000329.3(RPE65):c.235T>C (p.Tyr79His)	Likely Pathogenic	2	2	Domain-aggregate
RPE65	NM_000329.3(RPE65):c.1355T>G (p.Val452Gly)	Likely Pathogenic	2	2	Domain-aggregate
RPE65	NM_000329.3(RPE65):c.1580A>G (p.His527Arg)	Pathogenic	2	3	Domain-aggregate
RPE65	NM_000329.3(RPE65):c.499G>T (p.Asp167Tyr)	Pathogenic	2	2	Domain-aggregate
RPE65	NM_000329.3(RPE65):c.1328T>C (p.Val443Ala)	Likely Pathogenic	2	2	Domain-aggregate
RPE65	NM_000329.3(RPE65):c.1078G>A (p.Ala360Thr)	Uncertain Significance	0	-2	Domain-aggregate
RPE65	NM_000329.3(RPE65):c.118G>A (p.Gly40Ser)	Pathogenic	2	3	Domain-aggregate
RPE65	NM_000329.3(RPE65):c.1301C>A (p.Ala434Glu)	Likely Pathogenic	1	0	Domain-aggregate
RPE65	NM_000329.3(RPE65):c.544C>T (p.His182Tyr)	Pathogenic	2	2	Domain-aggregate
RPE65	NM_000329.3(RPE65):c.675C>G (p.Ile225Met)	Likely Benign	0	-3	Domain-aggregate
RPE65	NM_000329.3(RPE65):c.902A>G (p.Asn301Ser)	Uncertain Significance	0	-3	Domain-aggregate
RPE65	NM_000329.3(RPE65):c.331C>T (p.Pro111Ser)	Pathogenic	2	2	Domain-aggregate
RPE65	NM_000329.3(RPE65):c.1399C>G (p.Pro467Ala)	Pathogenic	2	2	Domain-aggregate
RPE65	NM_000329.3(RPE65):c.143G>A (p.Gly48Glu)	Likely Pathogenic	2	3	Domain-aggregate
RPE65	NM_000329.3(RPE65):c.1418T>A (p.Val473Asp)	Likely Pathogenic	2	3	Domain-aggregate
RPE65	NM_000329.3(RPE65):c.963T>G (p.Asn321Lys)	Benign	-1	-4	Domain-aggregate
RPE65	NM_000329.3(RPE65):c.859G>T (p.Val287Phe)	Likely Pathogenic	2	2	Domain-aggregate
RPE65	NM_000329.3(RPE65):c.1022T>C (p.Leu341Ser)	Pathogenic	2	2	Domain-aggregate
RPE65	NM_000329.3(RPE65):c.560G>A (p.Gly187Glu)	Pathogenic	2	2	Domain-aggregate
RPE65	NM_000329.3(RPE65):c.257C>A (p.Thr86Asn)	Uncertain Significance	0	0	Domain-aggregate
RPE65	NM_000329.3(RPE65):c.295G>A (p.Val99Ile)	Likely Benign	0	-2	Domain-aggregate
RPE65	NM_000329.3(RPE65):c.536C>T (p.Ala179Val)	Likely Pathogenic	2	3	Domain-aggregate
RPE65	NM_000329.3(RPE65):c.1301C>T (p.Ala434Val)	Benign	0	-3	Domain-aggregate
RPE65	NM_000329.3(RPE65):c.515T>A (p.Val172Asp)	Likely Pathogenic	2	0	Domain-aggregate
RPE65	NM_000329.3(RPE65):c.1583G>T (p.Gly528Val)	Likely Pathogenic	2	3	Domain-aggregate
RPE65	NM_000329.3(RPE65):c.310G>C (p.Gly104Arg)	Likely Pathogenic	2	3	Domain-aggregate
RPE65	NM_000329.3(RPE65):c.1590C>A (p.Phe530Leu)	Likely Pathogenic	2	2	Domain-aggregate
RPE65	NM_000329.3(RPE65):c.272G>C (p.Arg91Pro)	Likely Pathogenic	1	0	Domain-aggregate
RPE65	NM_000329.3(RPE65):c.444G>T (p.Glu148Asp)	Likely Pathogenic	1	0	Domain-aggregate
RPE65	NM_000329.3(RPE65):c.131G>A (p.Arg44Gln)	Pathogenic	2	3	Domain-aggregate
RPE65	NM_000329.3(RPE65):c.989G>A (p.Cys330Tyr)	Likely Pathogenic	1	0	Domain-aggregate
RPE65	NM_000329.3(RPE65):c.311G>T (p.Gly104Val)	Likely Pathogenic	2	3	Domain-aggregate
RPE65	NM_000329.3(RPE65):c.202C>T (p.His68Tyr)	Pathogenic	2	2	Domain-aggregate
RPE65	NM_000329.3(RPE65):c.770T>G (p.Val257Gly)	Likely Pathogenic	2	3	Domain-aggregate
RPE65	NM_000329.3(RPE65):c.1579C>T (p.His527Tyr)	Pathogenic	2	3	Domain-aggregate
RPE65	NM_000329.3(RPE65):c.311G>A (p.Gly104Asp)	Likely Pathogenic	2	3	Domain-aggregate
RPE65	NM_000329.3(RPE65):c.571A>G (p.Asn191Asp)	Likely Pathogenic	2	2	Domain-aggregate
GUCY2D	NM_000180.4(GUCY2D):c.2620G>A (p.Glu874Lys)	Uncertain Significance	1	0	Domain-aggregate
GUCY2D	NM_000180.4(GUCY2D):c.2059C>T (p.His687Tyr)	Uncertain Significance	0	-2	Domain-aggregate
GUCY2D	NM_000180.4(GUCY2D):c.2132C>T (p.Pro711Leu)	Likely Pathogenic	2	2	Domain-aggregate
GUCY2D	NM_000180.4(GUCY2D):c.307G>A (p.Glu103Lys)	Likely Pathogenic	0	1	Domain-aggregate
GUCY2D	NM_000180.4(GUCY2D):c.2179G>A (p.Gly727Ser)	Uncertain Significance	1	1	Domain-aggregate
GUCY2D	NM_000180.4(GUCY2D):c.164C>T (p.Thr55Met)	Likely Benign	0	0	Domain-aggregate
GUCY2D	NM_000180.4(GUCY2D):c.3098C>T (p.Ser1033Leu)	Likely Benign	-1	-3	Domain-aggregate
GUCY2D	NM_000180.4(GUCY2D):c.2303G>A (p.Arg768Gln)	Pathogenic	1	1	Domain-aggregate
GUCY2D	NM_000180.4(GUCY2D):c.1762C>T (p.Arg588Trp)	Pathogenic	0	0	Domain-aggregate
GUCY2D	NM_000180.4(GUCY2D):c.1672G>A (p.Asp558Asn)	Uncertain Significance	0	-1	Domain-aggregate
GUCY2D	NM_000180.4(GUCY2D):c.1979G>A (p.Arg660Gln)	Uncertain Significance	1	1	Domain-aggregate
GUCY2D	NM_000180.4(GUCY2D):c.937C>T (p.Arg313Cys)	Likely Pathogenic	0	1	Domain-aggregate
GUCY2D	NM_000180.4(GUCY2D):c.2983C>T (p.Arg995Trp)	Likely Pathogenic	2	0	Domain-aggregate
GUCY2D	NM_000180.4(GUCY2D):c.2927G>T (p.Arg976Leu)	Likely Pathogenic	2	1	Domain-aggregate
GUCY2D	NM_000180.4(GUCY2D):c.1694T>C (p.Phe565Ser)	Pathogenic	0	0	Domain-aggregate
GUCY2D	NM_000180.4(GUCY2D):c.74C>T (p.Ser25Phe)	Benign	-1	-2	Domain-aggregate
GUCY2D	NM_000180.4(GUCY2D):c.1315G>A (p.Gly439Arg)	Likely Benign	0	0	Domain-aggregate
GUCY2D	NM_000180.4(GUCY2D):c.271G>C (p.Ala91Pro)	Benign	-1	-1	Domain-aggregate
GUCY2D	NM_000180.4(GUCY2D):c.2917G>T (p.Val973Leu)	Likely Benign	0	-1	Domain-aggregate
GUCY2D	NM_000180.4(GUCY2D):c.2384G>A (p.Arg795Gln)	Likely Pathogenic	2	2	Domain-aggregate
GUCY2D	NM_000180.4(GUCY2D):c.935C>T (p.Thr312Met)	Likely Pathogenic	2	2	Domain-aggregate
GUCY2D	NM_000180.4(GUCY2D):c.1618C>T (p.Arg540Cys)	Uncertain Significance	0	1	Domain-aggregate
GUCY2D	NM_000180.4(GUCY2D):c.743C>G (p.Ser248Trp)	Likely Pathogenic	2	2	Domain-aggregate
GUCY2D	NM_000180.4(GUCY2D):c.1724C>T (p.Pro575Leu)	Benign	-1	-1	Domain-aggregate
GUCY2D	NM_000180.4(GUCY2D):c.1499C>T (p.Pro500Leu)	Uncertain Significance	0	1	Domain-aggregate
GUCY2D	NM_000180.4(GUCY2D):c.3056A>C (p.His1019Pro)	Likely Pathogenic	2	2	Domain-aggregate
GUCY2D	NM_000180.4(GUCY2D):c.1052A>G (p.Tyr351Cys)	Likely Pathogenic	1	2	Domain-aggregate
GUCY2D	NM_000180.4(GUCY2D):c.2302C>T (p.Arg768Trp)	Pathogenic	2	2	Domain-aggregate
NEB	NM_001164508.2(NEB):c.25463A>G (p.Lys8488Arg)	Likely Benign	0	-1	Domain-aggregate
NEB	NM_001164508.2(NEB):c.19097G>T (p.Ser6366Ile)	Pathogenic	1	2	Domain-aggregate
NEB	NM_001164508.2(NEB):c.11181T>A (p.Asp3727Glu)	Benign	-1	-1	Domain-aggregate
NEB	NM_001164508.2(NEB):c.18464A>C (p.Tyr6155Ser)	Likely Benign	0	-1	Domain-aggregate
NEB	NM_001164508.2(NEB):c.11341C>T (p.Arg3781Trp)	Likely Benign	0	-1	Domain-aggregate
CAPN3	NM_000070.3(CAPN3):c.146G>A (p.Arg49His)	Pathogenic	1	2	Domain-aggregate
CAPN3	NM_000070.3(CAPN3):c.329G>A (p.Arg110Gln)	Likely Benign	0	-3	Domain-aggregate
CAPN3	NM_000070.3(CAPN3):c.73C>T (p.His25Tyr)	Benign	0	-2	Domain-aggregate
CAPN3	NM_000070.3(CAPN3):c.1256A>G (p.Asp419Gly)	Likely Pathogenic	1	4	Domain-aggregate
CAPN3	NM_000070.3(CAPN3):c.700G>A (p.Gly234Arg)	Pathogenic	1	2	Domain-aggregate
CAPN3	NM_000070.3(CAPN3):c.363C>G (p.Ile121Met)	Likely Pathogenic	1	2	Domain-aggregate
CAPN3	NM_000070.3(CAPN3):c.1257T>G (p.Asp419Glu)	Likely Pathogenic	1	2	Domain-aggregate
CAPN3	NM_000070.3(CAPN3):c.701G>A (p.Gly234Glu)	Pathogenic	1	2	Domain-aggregate
CAPN3	NM_000070.3(CAPN3):c.633G>C (p.Lys211Asn)	Likely Pathogenic	1	1	Domain-aggregate
CAPN3	NM_000070.3(CAPN3):c.2120A>G (p.Asp707Gly)	Pathogenic	1	3	Domain-aggregate
CAPN3	NM_000070.3(CAPN3):c.1187A>G (p.Glu396Gly)	Likely Pathogenic	0	2	Domain-aggregate
CAPN3	NM_000070.3(CAPN3):c.1250C>T (p.Thr417Met)	Pathogenic	1	3	Domain-aggregate
CAPN3	NM_000070.3(CAPN3):c.2148G>T (p.Glu716Asp)	Pathogenic	1	1	Domain-aggregate
CAPN3	NM_000070.3(CAPN3):c.2105C>T (p.Ala702Val)	Pathogenic	1	0	Domain-aggregate
ATM	NM_000051.4(ATM):c.9022C>T (p.Arg3008Cys)	Likely Pathogenic	0	0	Domain-aggregate
ATM	NM_000051.4(ATM):c.6116A>T (p.Glu2039Val)	Uncertain Significance	0	0	Domain-aggregate
ATM	NM_000051.4(ATM):c.8678C>A (p.Ala2893Asp)	Uncertain Significance	1	2	Domain-aggregate
ATM	NM_000051.4(ATM):c.5858C>T (p.Thr1953Ile)	Uncertain Significance	1	3	Domain-aggregate
ATM	NM_000051.4(ATM):c.8520G>C (p.Leu2840Phe)	Uncertain Significance	0	-1	Domain-aggregate
ATM	NM_000051.4(ATM):c.590G>A (p.Gly197Glu)	Uncertain Significance	0	1	Domain-aggregate
ATM	NM_000051.4(ATM):c.7661A>G (p.His2554Arg)	Uncertain Significance	1	3	Domain-aggregate
ATM	NM_000051.4(ATM):c.8480T>G (p.Phe2827Cys)	Likely Pathogenic	1	2	Domain-aggregate
ATM	NM_000051.4(ATM):c.4850T>C (p.Leu1617Pro)	Uncertain Significance	1	3	Domain-aggregate
ATM	NM_000051.4(ATM):c.4394T>C (p.Leu1465Pro)	Likely Pathogenic	1	2	Domain-aggregate
ATM	NM_000051.4(ATM):c.6530A>C (p.Gln2177Pro)	Uncertain Significance	1	3	Domain-aggregate
ATM	NM_000051.4(ATM):c.8494C>T (p.Arg2832Cys)	Likely Pathogenic	1	1	Domain-aggregate
ATM	NM_000051.4(ATM):c.5228C>T (p.Thr1743Ile)	Pathogenic	1	2	Domain-aggregate
ATM	NM_000051.4(ATM):c.2932T>C (p.Ser978Pro)	Benign	1	3	Domain-aggregate
ATM	NM_000051.3(ATM):c.2614C>T (p.Pro872Ser)	Benign	-1	-2	Domain-aggregate
ATM	NM_000051.3(ATM):c.8546G>C (p.Arg2849Pro)	Likely Pathogenic	1	2	Domain-aggregate
ATM	NM_000051.4(ATM):c.5236G>A (p.Gly1746Arg)	Pathogenic	0	3	Domain-aggregate
ATM	NM_000051.3(ATM):c.1073A>G (p.Asn358Ser)	Benign	-1	-3	Domain-aggregate
ATM	NM_000051.4(ATM):c.3137T>C (p.Leu1046Pro)	Likely Pathogenic	1	3	Domain-aggregate
ATM	NM_000051.3(ATM):c.6995T>C (p.Leu2332Pro)	Benign	-1	-2	Domain-aggregate
ATM	NM_000051.4(ATM):c.3925G>A (p.Ala1309Thr)	Benign	-1	-3	Domain-aggregate
ATM	NM_000051.4(ATM):c.875C>T (p.Pro292Leu)	Likely Pathogenic	1	2	Domain-aggregate
ATM	NM_000051.4(ATM):c.8300T>C (p.Leu2767Pro)	Likely Pathogenic	1	2	Domain-aggregate
ATM	NM_000051.3(ATM):c.3118A>G (p.Met1040Val)	Benign	-1	-3	Domain-aggregate
ATM	NM_000051.3(ATM):c.7919C>G (p.Thr2640Ser)	Uncertain Significance	0	-3	Domain-aggregate
ATM	NM_000051.4(ATM):c.7355T>C (p.Leu2452Pro)	Likely Pathogenic	1	3	Domain-aggregate
ATM	NM_000051.4(ATM):c.9103C>T (p.Leu3035Phe)	Likely Pathogenic	1	1	Domain-aggregate
PAH	NM_000277.3(PAH):c.452A>G (p.Asp151Gly)	Likely Pathogenic	4	2	Domain-aggregate
PAH	NM_000277.3(PAH):c.1001G>C (p.Cys334Ser)	Likely Pathogenic	4	2	Domain-aggregate
PAH	NM_000277.2(PAH):c.737C>T (p.Ala246Val)	Likely Pathogenic	2	1	Domain-aggregate
PAH	NM_000277.3(PAH):c.587C>A (p.Ser196Tyr)	Uncertain Significance	0	-3	Domain-aggregate
PAH	NM_000277.3(PAH):c.870T>G (p.His290Gln)	Likely Pathogenic	1	1	Domain-aggregate
PAH	NM_000277.3(PAH):c.938C>T (p.Ala313Val)	Pathogenic	2	1	Domain-aggregate
PAH	NM_000277.2(PAH):c.718T>G (p.Phe240Val)	Likely Pathogenic	4	2	Domain-aggregate
PAH	NM_000277.3(PAH):c.451G>C (p.Asp151His)	Likely Pathogenic	4	2	Domain-aggregate
PAH	NM_000277.3(PAH):c.1007A>G (p.Gln336Arg)	Likely Pathogenic	4	1	Domain-aggregate
PAH	NM_000277.1(PAH):c.929C>T (p.Ser310Phe)	Pathogenic	1	2	Domain-aggregate
PAH	NM_000277.1(PAH):c.940C>A (p.Pro314Thr)	Pathogenic	0	0	Domain-aggregate
PAH	NM_000277.2(PAH):c.512G>C (p.Gly171Ala)	Likely Pathogenic	2	1	Domain-aggregate
PAH	NM_000277.3(PAH):c.1204T>C (p.Phe402Leu)	Likely Pathogenic	2	1	Domain-aggregate
PAH	NM_000277.3(PAH):c.1175T>C (p.Phe392Ser)	Likely Pathogenic	4	2	Domain-aggregate
PAH	NM_000277.1(PAH):c.1039C>T (p.Leu347Phe)	Likely Pathogenic	4	1	Domain-aggregate
PAH	NM_000277.2(PAH):c.704A>C (p.Gln235Pro)	Likely Pathogenic	4	1	Domain-aggregate
PAH	NM_000277.3(PAH):c.241A>C (p.Thr81Pro)	Likely Pathogenic	1	0	Domain-aggregate
PAH	NM_000277.3(PAH):c.479A>C (p.Gln160Pro)	Uncertain Significance	1	-1	Domain-aggregate
PAH	NM_000277.3(PAH):c.283A>T (p.Ile95Phe)	Likely Pathogenic	1	0	Domain-aggregate
PAH	NM_000277.2(PAH):c.782G>T (p.Arg261Leu)	Likely Pathogenic	4	2	Domain-aggregate
PAH	NM_000277.3(PAH):c.232G>A (p.Glu78Lys)	Likely Pathogenic	2	0	Domain-aggregate
PAH	NM_000277.3(PAH):c.533A>T (p.Glu178Val)	Likely Pathogenic	2	0	Domain-aggregate
PAH	NM_000277.3(PAH):c.1237C>A (p.Arg413Ser)	Pathogenic	4	1	Domain-aggregate
PAH	NM_000277.1(PAH):c.466G>C (p.Ala156Pro)	Pathogenic	0	0	Domain-aggregate
PAH	NM_000277.1(PAH):c.922C>T (p.Leu308Phe)	Pathogenic	1	0	Domain-aggregate
PAH	NM_000277.1(PAH):c.964G>A (p.Ala322Thr)	Pathogenic	1	0	Domain-aggregate
PAH	NM_000277.2(PAH):c.307G>T (p.Gly103Cys)	Uncertain Significance	2	2	Domain-aggregate
PAH	NM_000277.3(PAH):c.122T>C (p.Leu41Pro)	Likely Pathogenic	2	0	Domain-aggregate
PAH	NM_000277.3(PAH):c.1022A>C (p.Lys341Thr)	Likely Pathogenic	4	1	Domain-aggregate
PAH	NM_000277.2(PAH):c.250G>T (p.Asp84Tyr)	Pathogenic	1	0	Domain-aggregate
PAH	NM_000277.2(PAH):c.1301C>A (p.Ala434Asp)	Pathogenic	1	2	Domain-aggregate
PAH	NM_000277.2(PAH):c.793T>G (p.Cys265Gly)	Uncertain Significance	1	0	Domain-aggregate
PAH	NM_000277.3(PAH):c.1130A>G (p.Tyr377Cys)	Likely Pathogenic	1	0	Domain-aggregate
PAH	NM_000277.3(PAH):c.743T>G (p.Leu248Arg)	Uncertain Significance	1	2	Domain-aggregate
PAH	NM_000277.1(PAH):c.982A>G (p.Thr328Ala)	Likely Pathogenic	1	2	Domain-aggregate
PAH	NM_000277.2(PAH):c.833C>A (p.Thr278Asn)	Pathogenic	1	0	Domain-aggregate
PAH	NM_000277.2(PAH):c.737C>A (p.Ala246Asp)	Uncertain Significance	1	1	Domain-aggregate
PAH	NM_000277.1(PAH):c.665A>T (p.Asp222Val)	Likely Pathogenic	1	1	Domain-aggregate
PAH	NM_000277.1(PAH):c.1114A>T (p.Thr372Ser)	Likely Pathogenic	0	1	Domain-aggregate
PAH	NM_000277.2(PAH):c.830A>G (p.Tyr277Cys)	Pathogenic	1	1	Domain-aggregate
PAH	NM_000277.1(PAH):c.631C>A (p.Pro211Thr)	Pathogenic	1	0	Domain-aggregate
PAH	NM_000277.3(PAH):c.157C>T (p.Arg53Cys)	Likely Pathogenic	1	0	Domain-aggregate
PAH	NM_000277.2(PAH):c.1031G>T (p.Gly344Val)	Uncertain Significance	1	2	Domain-aggregate
PAH	NM_000277.1(PAH):c.1054G>C (p.Gly352Arg)	Likely Pathogenic	1	2	Domain-aggregate
PAH	NM_000277.2(PAH):c.1033G>T (p.Ala345Ser)	Pathogenic	1	1	Domain-aggregate
PAH	NM_000277.3(PAH):c.1262T>C (p.Ile421Thr)	Likely Pathogenic	1	1	Domain-aggregate
PAH	NM_000277.3(PAH):c.911A>G (p.Gln304Arg)	Likely Pathogenic	1	2	Domain-aggregate
PAH	NM_000277.3(PAH):c.1112A>G (p.Lys371Arg)	Uncertain Significance	0	-1	Domain-aggregate
PAH	NM_000277.3(PAH):c.828G>T (p.Met276Ile)	Uncertain Significance	0	-1	Domain-aggregate
PAH	NM_000277.3(PAH):c.532G>A (p.Glu178Lys)	Pathogenic	0	-2	Domain-aggregate
PAH	NM_000277.3(PAH):c.443G>T (p.Gly148Val)	Likely Pathogenic	1	1	Domain-aggregate
PAH	NM_000277.3(PAH):c.505C>G (p.Arg169Gly)	Pathogenic	1	0	Domain-aggregate
PAH	NM_000277.3(PAH):c.527G>A (p.Arg176Gln)	Pathogenic	0	-2	Domain-aggregate
PAH	NM_000277.2(PAH):c.140C>T (p.Ala47Val)	Likely Pathogenic	0	0	Domain-aggregate
PAH	NM_000277.3(PAH):c.1237C>T (p.Arg413Cys)	Uncertain Significance	1	1	Domain-aggregate
PAH	NM_000277.1(PAH):c.601C>T (p.His201Tyr)	Likely Pathogenic	0	0	Domain-aggregate
PAH	NM_000277.3(PAH):c.442G>A (p.Gly148Ser)	Likely Pathogenic	1	1	Domain-aggregate
PAH	NM_000277.1(PAH):c.965C>G (p.Ala322Gly)	Likely Pathogenic	1	0	Domain-aggregate
PAH	NM_000277.1(PAH):c.754C>G (p.Arg252Gly)	Pathogenic	1	1	Domain-aggregate
PAH	NM_000277.1(PAH):c.842C>T (p.Pro281Leu)	Likely Pathogenic	1	2	Domain-aggregate
PAH	NM_000277.1(PAH):c.841C>T (p.Pro281Ser)	Likely Pathogenic	1	2	Domain-aggregate
PAH	NM_000277.2(PAH):c.895T>C (p.Phe299Leu)	Uncertain Significance	1	1	Domain-aggregate
PAH	NM_000277.1(PAH):c.805A>C (p.Ile269Leu)	Pathogenic	1	0	Domain-aggregate
PAH	NM_000277.2(PAH):c.591G>C (p.Leu197Phe)	Likely Pathogenic	1	0	Domain-aggregate
PAH	NM_000277.2(PAH):c.440C>T (p.Pro147Leu)	Likely Pathogenic	1	1	Domain-aggregate
PAH	NM_000277.2(PAH):c.194T>C (p.Ile65Thr)	Pathogenic	1	1	Domain-aggregate
PAH	NM_000277.2(PAH):c.125A>T (p.Lys42Ile)	Likely Pathogenic	0	1	Domain-aggregate
PAH	NM_000277.2(PAH):c.385G>T (p.Asp129Tyr)	Uncertain Significance	1	2	Domain-aggregate
PAH	NM_000277.2(PAH):c.464G>A (p.Arg155His)	Pathogenic	1	1	Domain-aggregate
PAH	NM_000277.2(PAH):c.818C>T (p.Ser273Phe)	Likely Pathogenic	1	2	Domain-aggregate
PAH	NM_000277.2(PAH):c.289A>C (p.Ile97Leu)	Uncertain Significance	-1	-1	Domain-aggregate
PAH	NM_000277.2(PAH):c.940C>T (p.Pro314Ser)	Pathogenic	0	0	Domain-aggregate
PAH	NM_000277.2(PAH):c.864G>C (p.Leu288Phe)	Uncertain Significance	1	0	Domain-aggregate
PAH	NM_000277.2(PAH):c.568G>A (p.Val190Met)	Uncertain Significance	1	0	Domain-aggregate
PAH	NM_000277.2(PAH):c.187A>C (p.Thr63Pro)	Uncertain Significance	0	0	Domain-aggregate
PAH	NM_000277.2(PAH):c.176A>G (p.Asp59Gly)	Uncertain Significance	0	-1	Domain-aggregate
PAH	NM_000277.2(PAH):c.800A>T (p.Gln267Leu)	Uncertain Significance	1	2	Domain-aggregate
PAH	NM_000277.1(PAH):c.1222C>T (p.Arg408Trp)	Pathogenic	1	0	Domain-aggregate
PAH	NM_000277.1(PAH):c.782G>A (p.Arg261Gln)	Pathogenic	1	2	Domain-aggregate
PAH	NM_000277.1(PAH):c.1162G>A (p.Val388Met)	Pathogenic	1	0	Domain-aggregate
PAH	NM_000277.1(PAH):c.722G>A (p.Arg241His)	Pathogenic	1	0	Domain-aggregate
PAH	NM_000277.1(PAH):c.926C>T (p.Ala309Val)	Pathogenic	1	1	Domain-aggregate
PAH	NM_000277.2(PAH):c.801G>C (p.Gln267His)	Likely Pathogenic	1	1	Domain-aggregate
PAH	NM_000277.2(PAH):c.799C>G (p.Gln267Glu)	Pathogenic	1	1	Domain-aggregate
PAH	NM_000277.2(PAH):c.824C>G (p.Pro275Arg)	Likely Pathogenic	1	1	Domain-aggregate
PAH	NM_000277.2(PAH):c.796A>C (p.Thr266Pro)	Likely Pathogenic	1	2	Domain-aggregate
PAH	NM_000277.2(PAH):c.785T>G (p.Val262Gly)	Likely Pathogenic	1	1	Domain-aggregate
PAH	NM_000277.2(PAH):c.769G>T (p.Gly257Cys)	Likely Pathogenic	4	1	Domain-aggregate
PAH	NM_000277.3(PAH):c.205C>T (p.Pro69Ser)	Likely Pathogenic	0	0	Domain-aggregate
PAH	NM_000277.3(PAH):c.535T>C (p.Tyr179His)	Likely Pathogenic	1	1	Domain-aggregate
PAH	NM_000277.2(PAH):c.175G>T (p.Asp59Tyr)	Uncertain Significance	0	-1	Domain-aggregate
PAH	NM_000277.2(PAH):c.743T>C (p.Leu248Pro)	Uncertain Significance	1	2	Domain-aggregate
PAH	NM_000277.1(PAH):c.833C>T (p.Thr278Ile)	Pathogenic	1	1	Domain-aggregate
PAH	NM_000277.2(PAH):c.1012G>T (p.Asp338Tyr)	Pathogenic	0	-1	Domain-aggregate
PAH	NM_000277.2(PAH):c.733G>A (p.Val245Met)	Pathogenic	1	1	Domain-aggregate
PAH	NM_000277.2(PAH):c.293T>C (p.Leu98Ser)	Likely Pathogenic	1	0	Domain-aggregate
PAH	NM_000277.1(PAH):c.724C>T (p.Leu242Phe)	Pathogenic	1	1	Domain-aggregate
PAH	NM_000277.1(PAH):c.1159T>C (p.Tyr387His)	Likely Pathogenic	1	1	Domain-aggregate
PAH	NM_000277.3(PAH):c.1157A>G (p.Tyr386Cys)	Pathogenic	1	2	Domain-aggregate
PAH	NM_000277.1(PAH):c.649T>G (p.Cys217Gly)	Likely Pathogenic	0	1	Domain-aggregate
PAH	NM_000277.1(PAH):c.202A>G (p.Arg68Gly)	Pathogenic	1	1	Domain-aggregate
PAH	NM_000277.2(PAH):c.1031G>A (p.Gly344Asp)	Likely Pathogenic	1	2	Domain-aggregate
PAH	NM_000277.2(PAH):c.608G>A (p.Cys203Tyr)	Likely Pathogenic	1	2	Domain-aggregate
PAH	NM_000277.3(PAH):c.907T>G (p.Ser303Ala)	Likely Pathogenic	1	1	Domain-aggregate
PAH	NM_000277.3(PAH):c.1247C>A (p.Pro416Gln)	Likely Pathogenic	1	2	Domain-aggregate
PAH	NM_000277.3(PAH):c.161T>C (p.Leu54Ser)	Likely Pathogenic	1	0	Domain-aggregate
PAH	NM_000277.2(PAH):c.712A>C (p.Thr238Pro)	Likely Pathogenic	1	2	Domain-aggregate
PAH	NM_000277.3(PAH):c.1162G>C (p.Val388Leu)	Pathogenic	0	-1	Domain-aggregate
PAH	NM_000277.3(PAH):c.865G>A (p.Gly289Arg)	Pathogenic	1	2	Domain-aggregate
PAH	NM_000277.3(PAH):c.527G>T (p.Arg176Leu)	Pathogenic	0	-2	Domain-aggregate
PAH	NM_000277.3(PAH):c.439C>T (p.Pro147Ser)	Likely Pathogenic	1	1	Domain-aggregate
PAH	NM_000277.3(PAH):c.280A>G (p.Ile94Val)	Uncertain Significance	0	-1	Domain-aggregate
PAH	NM_000277.2(PAH):c.809G>A (p.Arg270Lys)	Pathogenic	1	1	Domain-aggregate
PAH	NM_000277.2(PAH):c.1069T>G (p.Cys357Gly)	Likely Pathogenic	1	1	Domain-aggregate
PAH	NM_000277.2(PAH):c.731C>T (p.Pro244Leu)	Likely Pathogenic	1	1	Domain-aggregate
PAH	NM_000277.2(PAH):c.183C>G (p.Asn61Lys)	Likely Pathogenic	0	0	Domain-aggregate
PAH	NM_000277.3(PAH):c.1304A>T (p.Asp435Val)	Likely Pathogenic	0	-1	Domain-aggregate
PAH	NM_000277.3(PAH):c.1171A>G (p.Ser391Gly)	Uncertain Significance	1	1	Domain-aggregate
PAH	NM_000277.1(PAH):c.981T>G (p.Phe327Leu)	Uncertain Significance	1	1	Domain-aggregate
PAH	NM_000277.3(PAH):c.1109A>G (p.Glu370Gly)	Likely Pathogenic	0	0	Domain-aggregate
PAH	NM_000277.2(PAH):c.1172G>C (p.Ser391Thr)	Likely Pathogenic	0	0	Domain-aggregate
PAH	NM_000277.3(PAH):c.136G>A (p.Gly46Ser)	Pathogenic	0	0	Domain-aggregate
PAH	NM_000277.1(PAH):c.212G>A (p.Arg71His)	Likely Pathogenic	1	0	Domain-aggregate
PAH	NM_000277.2(PAH):c.887A>G (p.Asp296Gly)	Uncertain Significance	1	2	Domain-aggregate
PAH	NM_000277.2(PAH):c.1240T>C (p.Tyr414His)	Uncertain Significance	1	2	Domain-aggregate
PAH	NM_000277.2(PAH):c.523C>T (p.Pro175Ser)	Likely Pathogenic	1	0	Domain-aggregate
PAH	NM_000277.2(PAH):c.464G>C (p.Arg155Pro)	Likely Pathogenic	1	2	Domain-aggregate
PAH	NM_000277.2(PAH):c.500A>T (p.Asn167Ile)	Likely Pathogenic	0	-2	Domain-aggregate
PAH	NM_000277.2(PAH):c.490A>G (p.Ile164Val)	Likely Pathogenic	0	-1	Domain-aggregate
PAH	NM_000277.2(PAH):c.242C>A (p.Thr81Asn)	Likely Pathogenic	1	0	Domain-aggregate
PAH	NM_000277.2(PAH):c.848T>A (p.Ile283Asn)	Pathogenic	1	1	Domain-aggregate
PAH	NM_000277.2(PAH):c.190C>A (p.His64Asn)	Uncertain Significance	1	0	Domain-aggregate
PAH	NM_000277.2(PAH):c.164T>C (p.Phe55Ser)	Likely Pathogenic	1	1	Domain-aggregate
PAH	NM_000277.2(PAH):c.812A>G (p.His271Arg)	Likely Pathogenic	1	2	Domain-aggregate
PAH	NM_000277.2(PAH):c.734T>C (p.Val245Ala)	Pathogenic	0	1	Domain-aggregate
PAH	NM_000277.1(PAH):c.1241A>G (p.Tyr414Cys)	Pathogenic	1	2	Domain-aggregate
PAH	NM_000277.1(PAH):c.1238G>C (p.Arg413Pro)	Pathogenic	1	0	Domain-aggregate
PAH	NM_000277.1(PAH):c.1139C>T (p.Thr380Met)	Pathogenic	1	2	Domain-aggregate
PAH	NM_000277.2(PAH):c.823C>T (p.Pro275Ser)	Pathogenic	1	1	Domain-aggregate
PAH	NM_000277.2(PAH):c.533A>G (p.Glu178Gly)	Pathogenic	2	0	Domain-aggregate
PAH	NM_000277.3(PAH):c.620A>G (p.Asn207Ser)	Likely Pathogenic	1	0	Domain-aggregate
PAH	NM_000277.3(PAH):c.1144T>C (p.Phe382Leu)	Pathogenic	1	0	Domain-aggregate
PAH	NM_000277.3(PAH):c.1117G>A (p.Ala373Thr)	Likely Pathogenic	0	0	Domain-aggregate
PAH	NM_000277.3(PAH):c.208T>C (p.Ser70Pro)	Likely Pathogenic	1	1	Domain-aggregate
PAH	NM_000277.2(PAH):c.794G>A (p.Cys265Tyr)	Likely Pathogenic	1	1	Domain-aggregate
PAH	NM_000277.2(PAH):c.770G>T (p.Gly257Val)	Pathogenic	1	2	Domain-aggregate
PAH	NM_000277.1(PAH):c.899C>T (p.Ala300Val)	Likely Pathogenic	1	2	Domain-aggregate
PAH	NM_000277.1(PAH):c.1181A>C (p.Asp394Ala)	Likely Pathogenic	1	1	Domain-aggregate
PAH	NM_000277.1(PAH):c.665A>G (p.Asp222Gly)	Likely Pathogenic	0	0	Domain-aggregate
PAH	NM_000277.1(PAH):c.635T>C (p.Leu212Pro)	Likely Pathogenic	1	2	Domain-aggregate
PAH	NM_000277.3(PAH):c.1150C>T (p.Pro384Ser)	Uncertain Significance	1	1	Domain-aggregate
PAH	NM_000277.2(PAH):c.1030G>C (p.Gly344Arg)	Uncertain Significance	1	2	Domain-aggregate
PAH	NM_000277.1(PAH):c.673C>G (p.Pro225Ala)	Likely Pathogenic	1	2	Domain-aggregate
PAH	NM_000277.3(PAH):c.529G>C (p.Val177Leu)	Pathogenic	0	0	Domain-aggregate
PAH	NM_000277.3(PAH):c.516G>T (p.Gln172His)	Likely Pathogenic	0	0	Domain-aggregate
PAH	NM_000277.3(PAH):c.563G>A (p.Gly188Asp)	Likely Pathogenic	1	0	Domain-aggregate
PAH	NM_000277.3(PAH):c.850T>C (p.Cys284Arg)	Likely Pathogenic	1	1	Domain-aggregate
PAH	NM_000277.1(PAH):c.716G>T (p.Gly239Val)	Likely Pathogenic	1	2	Domain-aggregate
PAH	NM_000277.1(PAH):c.935G>A (p.Gly312Asp)	Likely Pathogenic	1	1	Domain-aggregate
PAH	NM_000277.3(PAH):c.1229T>G (p.Phe410Cys)	Likely Pathogenic	1	2	Domain-aggregate
PAH	NM_000277.3(PAH):c.121C>T (p.Leu41Phe)	Pathogenic	0	1	Domain-aggregate
PAH	NM_000277.2(PAH):c.974A>G (p.Tyr325Cys)	Likely Pathogenic	1	2	Domain-aggregate
PAH	NM_000277.3(PAH):c.461A>T (p.Tyr154Phe)	Likely Pathogenic	1	1	Domain-aggregate
PAH	NM_000277.2(PAH):c.1163T>C (p.Val388Ala)	Likely Pathogenic	1	1	Domain-aggregate
PAH	NM_000277.2(PAH):c.889C>T (p.Arg297Cys)	Likely Pathogenic	1	0	Domain-aggregate
PAH	NM_000277.2(PAH):c.890G>A (p.Arg297His)	Pathogenic	1	-2	Domain-aggregate
PAH	NM_000277.2(PAH):c.781C>G (p.Arg261Gly)	Uncertain Significance	1	1	Domain-aggregate
PAH	NM_000277.2(PAH):c.158G>A (p.Arg53His)	Uncertain Significance	0	0	Domain-aggregate
PAH	NM_000277.2(PAH):c.521T>C (p.Ile174Thr)	Pathogenic	1	2	Domain-aggregate
PAH	NM_000277.2(PAH):c.143T>C (p.Leu48Ser)	Pathogenic	1	1	Domain-aggregate
PAH	NM_000277.2(PAH):c.472C>T (p.Arg158Trp)	Pathogenic	1	1	Domain-aggregate
PAH	NM_000277.2(PAH):c.506G>A (p.Arg169His)	Likely Pathogenic	0	0	Domain-aggregate
PAH	NM_000277.2(PAH):c.350C>T (p.Thr117Ile)	Uncertain Significance	0	0	Domain-aggregate
PAH	NM_000277.2(PAH):c.1217T>C (p.Ile406Thr)	Likely Pathogenic	1	1	Domain-aggregate
PAH	NM_000277.2(PAH):c.1100T>C (p.Leu367Pro)	Uncertain Significance	1	1	Domain-aggregate
PAH	NM_000277.2(PAH):c.529G>A (p.Val177Met)	Pathogenic	1	0	Domain-aggregate
PAH	NM_000277.2(PAH):c.865G>C (p.Gly289Arg)	Pathogenic	1	2	Domain-aggregate
PAH	NM_000277.2(PAH):c.820A>G (p.Lys274Glu)	Likely Benign	0	-4	Domain-aggregate
PAH	NM_000277.2(PAH):c.740G>A (p.Gly247Asp)	Uncertain Significance	1	2	Domain-aggregate
PAH	NM_000277.1(PAH):c.983C>T (p.Thr328Ile)	Uncertain Significance	1	1	Domain-aggregate
PAH	NM_000277.1(PAH):c.1208C>T (p.Ala403Val)	Pathogenic	0	1	Domain-aggregate
PAH	NM_000277.1(PAH):c.638T>C (p.Leu213Pro)	Pathogenic	1	2	Domain-aggregate
PAH	NM_000277.1(PAH):c.916A>G (p.Ile306Val)	Pathogenic	1	0	Domain-aggregate
PAH	NM_000277.1(PAH):c.520A>G (p.Ile174Val)	Likely Pathogenic	1	0	Domain-aggregate
PAH	NM_000277.2(PAH):c.650G>A (p.Cys217Tyr)	Uncertain Significance	1	2	Domain-aggregate
PAH	NM_000277.2(PAH):c.826A>G (p.Met276Val)	Likely Pathogenic	0	0	Domain-aggregate
PAH	NM_000277.2(PAH):c.473G>A (p.Arg158Gln)	Pathogenic	1	1	Domain-aggregate
PAH	NM_000277.2(PAH):c.386A>G (p.Asp129Gly)	Likely Pathogenic	1	2	Domain-aggregate
PAH	NM_000277.2(PAH):c.770G>A (p.Gly257Asp)	Likely Pathogenic	4	2	Domain-aggregate
PAH	NM_000277.1(PAH):c.1184C>A (p.Ala395Asp)	Likely Pathogenic	1	2	Domain-aggregate
PAH	NM_000277.3(PAH):c.1156T>G (p.Tyr386Asp)	Likely Pathogenic	1	2	Domain-aggregate
PAH	NM_000277.3(PAH):c.617A>G (p.Tyr206Cys)	Likely Pathogenic	1	1	Domain-aggregate
PAH	NM_000277.3(PAH):c.1003A>G (p.Lys335Glu)	Uncertain Significance	0	0	Domain-aggregate
PAH	NM_000277.3(PAH):c.329C>T (p.Ser110Leu)	Likely Pathogenic	0	2	Domain-aggregate
PAH	NM_000277.2(PAH):c.997C>T (p.Leu333Phe)	Pathogenic	1	1	Domain-aggregate
PAH	NM_000277.2(PAH):c.746T>A (p.Leu249His)	Likely Pathogenic	1	2	Domain-aggregate
PAH	NM_000277.2(PAH):c.719T>C (p.Phe240Ser)	Likely Pathogenic	1	2	Domain-aggregate
PAH	NM_000277.1(PAH):c.1289T>C (p.Leu430Pro)	Likely Pathogenic	1	2	Domain-aggregate
PAH	NM_000277.1(PAH):c.689T>G (p.Val230Gly)	Uncertain Significance	1	2	Domain-aggregate
PAH	NM_000277.2(PAH):c.832A>G (p.Thr278Ala)	Likely Pathogenic	1	2	Domain-aggregate
PAH	NM_000277.1(PAH):c.653G>T (p.Gly218Val)	Pathogenic	1	1	Domain-aggregate
PAH	NM_000277.3(PAH):c.1074A>T (p.Leu358Phe)	Likely Pathogenic	1	0	Domain-aggregate
PAH	NM_000277.1(PAH):c.1097C>A (p.Pro366His)	Likely Pathogenic	1	1	Domain-aggregate
PAH	NM_000277.1(PAH):c.609C>G (p.Cys203Trp)	Likely Pathogenic	1	1	Domain-aggregate
PAH	NM_000277.3(PAH):c.1048T>A (p.Ser350Thr)	Likely Pathogenic	1	2	Domain-aggregate
PAH	NM_000277.3(PAH):c.1019T>C (p.Ile340Thr)	Uncertain Significance	0	0	Domain-aggregate
PAH	NM_000277.3(PAH):c.463C>T (p.Arg155Cys)	Likely Pathogenic	1	1	Domain-aggregate
PAH	NM_000277.2(PAH):c.1196T>C (p.Val399Ala)	Likely Pathogenic	1	0	Domain-aggregate
PAH	NM_000277.3(PAH):c.1102G>A (p.Glu368Lys)	Likely Pathogenic	0	-1	Domain-aggregate
PAH	NM_000277.1(PAH):c.613G>A (p.Glu205Lys)	Likely Pathogenic	1	1	Domain-aggregate
PAH	NM_000277.2(PAH):c.662A>G (p.Glu221Gly)	Likely Pathogenic	1	1	Domain-aggregate
PAH	NM_000277.3(PAH):c.1004A>C (p.Lys335Thr)	Uncertain Significance	1	0	Domain-aggregate
PAH	NM_000277.1(PAH):c.853C>T (p.His285Tyr)	Uncertain Significance	1	2	Domain-aggregate
PAH	NM_000277.3(PAH):c.523C>G (p.Pro175Ala)	Uncertain Significance	1	1	Domain-aggregate
PAH	NM_000277.3(PAH):c.460T>C (p.Tyr154His)	Likely Pathogenic	1	2	Domain-aggregate
PAH	NM_000277.2(PAH):c.535T>A (p.Tyr179Asn)	Likely Pathogenic	1	1	Domain-aggregate
PAH	NM_000277.2(PAH):c.1033G>A (p.Ala345Thr)	Likely Pathogenic	1	2	Domain-aggregate
PAH	NM_000277.2(PAH):c.505C>T (p.Arg169Cys)	Likely Pathogenic	0	-1	Domain-aggregate
PAH	NM_000277.1(PAH):c.782G>C (p.Arg261Pro)	Pathogenic	1	2	Domain-aggregate
PAH	NM_000277.2(PAH):c.311C>A (p.Ala104Asp)	Pathogenic	0	1	Domain-aggregate
PAH	NM_000277.2(PAH):c.110T>C (p.Leu37Pro)	Likely Pathogenic	1	1	Domain-aggregate
PAH	NM_000277.2(PAH):c.856G>A (p.Glu286Lys)	Pathogenic	1	2	Domain-aggregate
PAH	NM_000277.2(PAH):c.434A>T (p.Asp145Val)	Likely Pathogenic	1	2	Domain-aggregate
PAH	NM_000277.2(PAH):c.194T>A (p.Ile65Asn)	Likely Pathogenic	1	1	Domain-aggregate
PAH	NM_000277.2(PAH):c.1271T>C (p.Leu424Ser)	Uncertain Significance	1	2	Domain-aggregate
PAH	NM_000277.2(PAH):c.812A>T (p.His271Leu)	Uncertain Significance	1	1	Domain-aggregate
PAH	NM_000277.2(PAH):c.745C>T (p.Leu249Phe)	Pathogenic	1	2	Domain-aggregate
PAH	NM_000277.2(PAH):c.829T>G (p.Tyr277Asp)	Pathogenic	1	1	Domain-aggregate
PAH	NM_000277.1(PAH):c.1243G>A (p.Asp415Asn)	Pathogenic	0	-3	Domain-aggregate
PAH	NM_000277.1(PAH):c.1223G>A (p.Arg408Gln)	Pathogenic	1	1	Domain-aggregate
PAH	NM_000277.1(PAH):c.1169A>G (p.Glu390Gly)	Pathogenic	1	2	Domain-aggregate
PAH	NM_000277.1(PAH):c.754C>T (p.Arg252Trp)	Pathogenic	1	2	Domain-aggregate
PAH	NM_000277.1(PAH):c.508C>G (p.His170Asp)	Pathogenic	1	1	Domain-aggregate
PAH	NM_000277.2(PAH):c.199T>C (p.Ser67Pro)	Pathogenic	1	1	Domain-aggregate
PAH	NM_000277.3(PAH):c.824C>T (p.Pro275Leu)	Pathogenic	1	1	Domain-aggregate
PAH	NM_000277.2(PAH):c.193A>G (p.Ile65Val)	Pathogenic	1	0	Domain-aggregate
PAH	NM_000277.3(PAH):c.561G>C (p.Trp187Cys)	Likely Pathogenic	1	1	Domain-aggregate
PAH	NM_000277.1(PAH):c.155T>C (p.Leu52Ser)	Likely Pathogenic	1	1	Domain-aggregate
PAH	NM_000277.2(PAH):c.699C>A (p.Phe233Leu)	Pathogenic	1	1	Domain-aggregate
PAH	NM_000277.1(PAH):c.1180G>C (p.Asp394His)	Likely Pathogenic	1	1	Domain-aggregate
PAH	NM_000277.2(PAH):c.1030G>A (p.Gly344Ser)	Likely Pathogenic	1	2	Domain-aggregate
PAH	NM_000277.3(PAH):c.117C>G (p.Phe39Leu)	Pathogenic	0	0	Domain-aggregate
PAH	NM_000277.1(PAH):c.728G>T (p.Arg243Leu)	Likely Pathogenic	1	2	Domain-aggregate
PAH	NM_000277.3(PAH):c.1252A>C (p.Thr418Pro)	Pathogenic	1	1	Domain-aggregate
PAH	NM_000277.3(PAH):c.1022A>G (p.Lys341Arg)	Uncertain Significance	0	0	Domain-aggregate
PAH	NM_000277.3(PAH):c.1066T>C (p.Tyr356His)	Uncertain Significance	0	0	Domain-aggregate
PAH	NM_000277.2(PAH):c.506G>C (p.Arg169Pro)	Uncertain Significance	1	0	Domain-aggregate
PAH	NM_000277.3(PAH):c.869A>T (p.His290Leu)	Uncertain Significance	1	2	Domain-aggregate
PAH	NM_000277.3(PAH):c.869A>G (p.His290Arg)	Uncertain Significance	1	2	Domain-aggregate
PAH	NM_000277.2(PAH):c.1220C>T (p.Pro407Leu)	Likely Pathogenic	0	1	Domain-aggregate
PAH	NM_000277.3(PAH):c.320A>G (p.His107Arg)	Pathogenic	0	0	Domain-aggregate
PAH	NM_000277.2(PAH):c.545A>G (p.Glu182Gly)	Likely Pathogenic	1	1	Domain-aggregate
PAH	NM_000277.3(PAH):c.204A>T (p.Arg68Ser)	Pathogenic	1	0	Domain-aggregate
PAH	NM_000277.1(PAH):c.1180G>T (p.Asp394Tyr)	Likely Pathogenic	1	1	Domain-aggregate
PAH	NM_000277.2(PAH):c.682G>A (p.Glu228Lys)	Uncertain Significance	1	1	Domain-aggregate
PAH	NM_000277.3(PAH):c.1027T>G (p.Tyr343Asp)	Likely Pathogenic	1	2	Domain-aggregate
PAH	NM_000277.3(PAH):c.1132A>T (p.Thr378Ser)	Uncertain Significance	-1	-3	Domain-aggregate
PAH	NM_000277.2(PAH):c.301G>A (p.Asp101Asn)	Likely Pathogenic	0	0	Domain-aggregate
PAH	NM_000277.3(PAH):c.1264G>A (p.Glu422Lys)	Uncertain Significance	1	1	Domain-aggregate
PAH	NM_000277.2(PAH):c.473G>C (p.Arg158Pro)	Uncertain Significance	1	2	Domain-aggregate
PAH	NM_000277.2(PAH):c.386A>T (p.Asp129Val)	Uncertain Significance	1	2	Domain-aggregate
PAH	NM_000277.2(PAH):c.757G>A (p.Asp253Asn)	Uncertain Significance	1	0	Domain-aggregate
PAH	NM_000277.3(PAH):c.460T>A (p.Tyr154Asn)	Uncertain Significance	1	1	Domain-aggregate
PAH	NM_000277.2(PAH):c.637C>T (p.Leu213Phe)	Uncertain Significance	1	1	Domain-aggregate
PAH	NM_000277.2(PAH):c.559T>C (p.Trp187Arg)	Likely Pathogenic	1	1	Domain-aggregate
PAH	NM_000277.2(PAH):c.493G>A (p.Ala165Thr)	Likely Pathogenic	1	1	Domain-aggregate
PAH	NM_000277.2(PAH):c.493G>C (p.Ala165Pro)	Uncertain Significance	1	1	Domain-aggregate
PAH	NM_000277.2(PAH):c.581T>C (p.Leu194Pro)	Likely Pathogenic	1	1	Domain-aggregate
PAH	NM_000277.2(PAH):c.355C>T (p.Pro119Ser)	Likely Pathogenic	1	1	Domain-aggregate
PAH	NM_000277.2(PAH):c.299A>G (p.His100Arg)	Uncertain Significance	-1	0	Domain-aggregate
PAH	NM_000277.2(PAH):c.811C>T (p.His271Tyr)	Uncertain Significance	1	2	Domain-aggregate
PAH	NM_000277.2(PAH):c.739G>C (p.Gly247Arg)	Likely Pathogenic	1	2	Domain-aggregate
PAH	NM_000277.2(PAH):c.739G>A (p.Gly247Ser)	Likely Pathogenic	1	2	Domain-aggregate
PAH	NM_000277.2(PAH):c.907T>C (p.Ser303Pro)	Likely Pathogenic	1	2	Domain-aggregate
PAH	NM_000277.2(PAH):c.46T>C (p.Ser16Pro)	Uncertain Significance	-1	0	Domain-aggregate
PAH	NM_000277.1(PAH):c.721C>T (p.Arg241Cys)	Pathogenic	1	0	Domain-aggregate
PAH	NM_000277.1(PAH):c.898G>T (p.Ala300Ser)	Pathogenic	1	1	Domain-aggregate
PAH	NM_000277.1(PAH):c.755G>A (p.Arg252Gln)	Pathogenic	1	1	Domain-aggregate
PAH	NM_000277.2(PAH):c.802T>C (p.Tyr268His)	Uncertain Significance	1	2	Domain-aggregate
PAH	NM_000277.2(PAH):c.827T>A (p.Met276Lys)	Likely Pathogenic	0	0	Domain-aggregate
PAH	NM_000277.2(PAH):c.789C>G (p.Phe263Leu)	Uncertain Significance	1	1	Domain-aggregate
PAH	NM_000277.2(PAH):c.791A>T (p.His264Leu)	Uncertain Significance	1	1	Domain-aggregate
PAH	NM_000277.2(PAH):c.181A>G (p.Asn61Asp)	Likely Pathogenic	1	0	Domain-aggregate
PAH	NM_000277.3(PAH):c.1229T>C (p.Phe410Ser)	Pathogenic	4	2	Domain-aggregate
PAH	NM_000277.1(PAH):c.1183G>C (p.Ala395Pro)	Pathogenic	4	2	Domain-aggregate
PAH	NM_000277.1(PAH):c.716G>A (p.Gly239Asp)	Pathogenic	4	2	Domain-aggregate
PIK3CA	NM_006218.4(PIK3CA):c.2176G>A (p.Glu726Lys)	Pathogenic	0	0	Domain-aggregate
PIK3CA	NM_006218.3(PIK3CA):c.2198A>G (p.Lys733Arg)	Benign	0	-1	Domain-aggregate
PIK3CA	NM_006218.4(PIK3CA):c.3140A>G (p.His1047Arg)	Pathogenic	0	0	Domain-aggregate
PIK3CA	NM_006218.4(PIK3CA):c.1631C>A (p.Thr544Asn)	Uncertain Significance	0	-3	Domain-aggregate
PIK3CA	NM_006218.4(PIK3CA):c.93A>G (p.Ile31Met)	Uncertain Significance	0	-1	Domain-aggregate
RAG2	NM_000536.4(RAG2):c.104G>C (p.Gly35Ala)	Pathogenic	0	3	Domain-aggregate
RAG2	NM_000536.4(RAG2):c.14T>A (p.Met5Lys)	Uncertain Significance	0	0	Domain-aggregate
RAG2	NM_000536.4(RAG2):c.68A>G (p.Asn23Ser)	Uncertain Significance	0	-1	Domain-aggregate
RAG2	NM_000536.4(RAG2):c.1247G>T (p.Trp416Leu)	Likely Pathogenic	0	2	Domain-aggregate
RAG2	NM_000536.4(RAG2):c.686G>A (p.Arg229Gln)	Pathogenic	0	3	Domain-aggregate
RAG2	NM_000536.4(RAG2):c.217C>T (p.Arg73Cys)	Likely Pathogenic	0	3	Domain-aggregate
RAG2	NM_000536.4(RAG2):c.501A>C (p.Arg167Ser)	Uncertain Significance	0	3	Domain-aggregate
RAG2	NM_000536.4(RAG2):c.53G>T (p.Gly18Val)	Uncertain Significance	0	2	Domain-aggregate
RAG2	NM_000536.4(RAG2):c.77G>C (p.Gly26Ala)	Uncertain Significance	0	0	Domain-aggregate
RAG2	NM_000536.4(RAG2):c.19A>G (p.Thr7Ala)	Uncertain Significance	0	0	Domain-aggregate
RAG2	NM_000536.4(RAG2):c.1332C>G (p.Ile444Met)	Likely Pathogenic	0	0	Domain-aggregate
RAG2	NM_000536.4(RAG2):c.1309G>A (p.Glu437Lys)	Likely Pathogenic	0	1	Domain-aggregate
RAG2	NM_000536.4(RAG2):c.115A>G (p.Arg39Gly)	Pathogenic	0	3	Domain-aggregate
RAG2	NM_000536.4(RAG2):c.878A>G (p.Glu293Gly)	Benign	0	-3	Domain-aggregate
RAG2	NM_000536.4(RAG2):c.909G>T (p.Glu303Asp)	Uncertain Significance	0	-2	Domain-aggregate
RAG2	NM_000536.4(RAG2):c.685C>T (p.Arg229Trp)	Pathogenic	0	3	Domain-aggregate
RAG2	NM_000536.4(RAG2):c.1396C>T (p.Leu466Phe)	Likely Pathogenic	0	0	Domain-aggregate
RAG2	NM_000536.4(RAG2):c.1352G>C (p.Gly451Ala)	Pathogenic	0	2	Domain-aggregate
RAG2	NM_000536.4(RAG2):c.13A>T (p.Met5Leu)	Uncertain Significance	0	-1	Domain-aggregate
RAG2	NM_000536.4(RAG2):c.644C>T (p.Thr215Ile)	Benign	0	-1	Domain-aggregate
RAG2	NM_000536.4(RAG2):c.1357T>A (p.Trp453Arg)	Likely Pathogenic	0	2	Domain-aggregate
RAG2	NM_000536.4(RAG2):c.283G>A (p.Gly95Arg)	Likely Pathogenic	0	2	Domain-aggregate
RAG2	NM_000536.4(RAG2):c.22G>A (p.Val8Ile)	Likely Benign	0	-2	Domain-aggregate
RAG2	NM_000536.4(RAG2):c.193G>T (p.Asp65Tyr)	Likely Pathogenic	0	2	Domain-aggregate
RAG2	NM_000536.4(RAG2):c.35T>C (p.Ile12Thr)	Uncertain Significance	0	0	Domain-aggregate
RAG2	NM_000536.4(RAG2):c.328A>C (p.Met110Leu)	Uncertain Significance	0	-3	Domain-aggregate
RAG2	NM_000536.4(RAG2):c.302A>G (p.Asn101Ser)	Uncertain Significance	0	2	Domain-aggregate
RAG2	NM_000536.4(RAG2):c.25A>G (p.Ser9Gly)	Uncertain Significance	0	-1	Domain-aggregate
RAG2	NM_000536.4(RAG2):c.74A>G (p.Asp25Gly)	Uncertain Significance	0	-1	Domain-aggregate
RAG2	NM_000536.4(RAG2):c.95G>T (p.Gly32Val)	Uncertain Significance	0	3	Domain-aggregate
RAG2	NM_000536.4(RAG2):c.1421A>G (p.Asn474Ser)	Uncertain Significance	0	-4	Domain-aggregate
RAG2	NM_000536.4(RAG2):c.1338C>G (p.Cys446Trp)	Likely Pathogenic	0	0	Domain-aggregate
FOXN1	NM_001369369.1(FOXN1):c.1184C>T (p.Pro395Leu)	Likely Benign	-1	-1	Domain-aggregate
FOXN1	NM_001369369.1(FOXN1):c.361G>A (p.Ala121Thr)	Uncertain Significance	-1	-2	Domain-aggregate
FOXN1	NM_001369369.1(FOXN1):c.713G>A (p.Gly238Asp)	Likely Benign	0	0	Domain-aggregate
FOXN1	NM_001369369.1(FOXN1):c.880G>C (p.Val294Leu)	Likely Pathogenic	1	-1	Domain-aggregate
FOXN1	NM_001369369.1(FOXN1):c.974T>C (p.Leu325Pro)	Likely Pathogenic	2	2	Domain-aggregate
FOXN1	NM_001369369.1(FOXN1):c.962A>G (p.His321Arg)	Likely Pathogenic	2	2	Domain-aggregate
FOXN1	NM_001369369.1(FOXN1):c.362C>T (p.Ala121Val)	Likely Benign	-1	-2	Domain-aggregate
FOXN1	NM_001369369.1(FOXN1):c.1036T>C (p.Trp346Arg)	Uncertain Significance	2	1	Domain-aggregate
FOXN1	NM_001369369.1(FOXN1):c.1049C>T (p.Pro350Leu)	Likely Pathogenic	1	0	Domain-aggregate
FOXN1	NM_001369369.1(FOXN1):c.1886C>T (p.Thr629Met)	Likely Benign	-1	-2	Domain-aggregate
FOXN1	NM_001369369.1(FOXN1):c.1664C>T (p.Ala555Val)	Likely Benign	-1	-2	Domain-aggregate
FOXN1	NM_001369369.1(FOXN1):c.1556T>A (p.Leu519Gln)	Benign	0	1	Domain-aggregate
FOXN1	NM_001369369.1(FOXN1):c.1021C>T (p.Arg341Cys)	Uncertain Significance	1	0	Domain-aggregate
FOXN1	NM_001369369.1(FOXN1):c.1706C>A (p.Ser569Tyr)	Likely Benign	0	0	Domain-aggregate
FOXN1	NM_001369369.1(FOXN1):c.1757G>A (p.Cys586Tyr)	Likely Benign	0	1	Domain-aggregate
FOXN1	NM_001369369.1(FOXN1):c.814C>A (p.Pro272Thr)	Likely Pathogenic	2	1	Domain-aggregate
FOXN1	NM_001369369.1(FOXN1):c.965A>G (p.Asn322Ser)	Likely Pathogenic	2	1	Domain-aggregate
FOXN1	NM_001369369.1(FOXN1):c.961C>A (p.His321Asn)	Likely Pathogenic	1	1	Domain-aggregate
IL2RG	NM_000206.3(IL2RG):c.655T>C (p.Tyr219His)	Uncertain Significance	0	2	Domain-aggregate
IL2RG	NM_000206.3(IL2RG):c.325G>A (p.Glu109Lys)	Benign	0	-3	Domain-aggregate
IL2RG	NM_000206.3(IL2RG):c.1105A>G (p.Thr369Ala)	Uncertain Significance	0	-1	Domain-aggregate
IL2RG	NM_000206.3(IL2RG):c.406C>T (p.Arg136Trp)	Likely Benign	0	-1	Domain-aggregate
IL2RG	NM_000206.3(IL2RG):c.677G>A (p.Arg226His)	Pathogenic	0	1	Domain-aggregate
IL2RG	NM_000206.3(IL2RG):c.676C>T (p.Arg226Cys)	Pathogenic	0	1	Domain-aggregate
IL2RG	NM_000206.3(IL2RG):c.664C>T (p.Arg222Cys)	Pathogenic	0	2	Domain-aggregate
IL2RG	NM_000206.3(IL2RG):c.821T>C (p.Ile274Thr)	Uncertain Significance	0	0	Domain-aggregate
IL2RG	NM_000206.3(IL2RG):c.460C>T (p.Pro154Ser)	Uncertain Significance	0	3	Domain-aggregate
IL2RG	NM_000206.3(IL2RG):c.1061A>G (p.His354Arg)	Likely Benign	0	0	Domain-aggregate
IL2RG	NM_000206.3(IL2RG):c.184T>A (p.Cys62Ser)	Likely Pathogenic	0	3	Domain-aggregate
IL2RG	NM_000206.3(IL2RG):c.670C>T (p.Arg224Trp)	Pathogenic	0	3	Domain-aggregate
IL2RG	NM_000206.3(IL2RG):c.332T>C (p.Ile111Thr)	Likely Benign	0	-2	Domain-aggregate
IL2RG	NM_000206.3(IL2RG):c.977G>A (p.Ser326Asn)	Likely Benign	0	-1	Domain-aggregate
IL2RG	NM_000206.3(IL2RG):c.694G>A (p.Gly232Arg)	Uncertain Significance	0	3	Domain-aggregate
IL2RG	NM_000206.3(IL2RG):c.545G>A (p.Cys182Tyr)	Likely Pathogenic	0	1	Domain-aggregate
IL2RG	NM_000206.3(IL2RG):c.311A>T (p.His104Leu)	Likely Benign	0	0	Domain-aggregate
IL2RG	NM_000206.3(IL2RG):c.292A>G (p.Lys98Glu)	Uncertain Significance	0	0	Domain-aggregate
LZTR1	NM_006767.4(LZTR1):c.742G>A (p.Gly248Arg)	Likely Pathogenic	1	2	Domain-aggregate
LZTR1	NM_006767.4(LZTR1):c.1234C>T (p.Arg412Cys)	Uncertain Significance	0	-1	Domain-aggregate
LZTR1	NM_006767.4(LZTR1):c.1723G>A (p.Asp575Asn)	Uncertain Significance	-1	-2	Domain-aggregate
LZTR1	NM_006767.4(LZTR1):c.361C>G (p.His121Asp)	Uncertain Significance	1	1	Domain-aggregate
LZTR1	NM_006767.4(LZTR1):c.850C>T (p.Arg284Cys)	Likely Pathogenic	1	2	Domain-aggregate
LZTR1	NM_006767.4(LZTR1):c.26G>C (p.Gly9Ala)	Uncertain Significance	-1	-3	Domain-aggregate
LZTR1	NM_006767.4(LZTR1):c.1333G>A (p.Val445Met)	Likely Benign	0	0	Domain-aggregate
LZTR1	NM_006767.4(LZTR1):c.842C>T (p.Pro281Leu)	Pathogenic	0	0	Domain-aggregate
LZTR1	NM_006767.4(LZTR1):c.848G>A (p.Arg283Gln)	Likely Pathogenic	0	0	Domain-aggregate
LZTR1	NM_006767.4(LZTR1):c.1687G>C (p.Glu563Gln)	Uncertain Significance	-1	-2	Domain-aggregate
LZTR1	NM_006767.4(LZTR1):c.1700G>A (p.Arg567His)	Likely Benign	-1	-2	Domain-aggregate
ACTA1	NM_001100.4(ACTA1):c.172G>A (p.Asp58Asn)	Likely Pathogenic	1	-3	Domain-aggregate
ACTA1	NM_001100.4(ACTA1):c.1106C>T (p.Pro369Leu)	Pathogenic	1	0	Domain-aggregate
ACTA1	NM_001100.4(ACTA1):c.283G>A (p.Glu95Lys)	Pathogenic	1	1	Domain-aggregate
ACTA1	NM_001100.4(ACTA1):c.1071G>C (p.Met357Ile)	Uncertain Significance	1	0	Domain-aggregate
ACTA1	NM_001100.4(ACTA1):c.334C>A (p.Leu112Ile)	Uncertain Significance	1	0	Domain-aggregate
ACTA1	NM_001100.4(ACTA1):c.1001C>G (p.Pro334Arg)	Pathogenic	1	0	Domain-aggregate
ACTA1	NM_001100.4(ACTA1):c.493G>A (p.Val165Met)	Pathogenic	1	1	Domain-aggregate
ACTA1	NM_001100.4(ACTA1):c.1127G>T (p.Cys376Phe)	Likely Pathogenic	1	1	Domain-aggregate
ACTA1	NM_001100.4(ACTA1):c.1054T>C (p.Ser352Pro)	Likely Pathogenic	1	1	Domain-aggregate
ACTA1	NM_001100.4(ACTA1):c.1043T>A (p.Leu348Gln)	Likely Pathogenic	1	1	Domain-aggregate
ACTA1	NM_001100.4(ACTA1):c.1074G>T (p.Trp358Cys)	Likely Pathogenic	1	1	Domain-aggregate
ACTA1	NM_001100.4(ACTA1):c.868G>C (p.Asp290His)	Pathogenic	1	1	Domain-aggregate
ACTA1	NM_001100.4(ACTA1):c.124C>T (p.His42Tyr)	Pathogenic	1	-1	Domain-aggregate
ACTA1	NM_001100.4(ACTA1):c.414C>G (p.Ile138Met)	Likely Pathogenic	1	0	Domain-aggregate
ACTA1	NM_001100.4(ACTA1):c.109G>T (p.Val37Leu)	Pathogenic	1	0	Domain-aggregate
ACTA1	NM_001100.4(ACTA1):c.442G>A (p.Gly148Ser)	Likely Pathogenic	1	1	Domain-aggregate
ACTA1	NM_001100.4(ACTA1):c.1001C>T (p.Pro334Leu)	Likely Pathogenic	1	0	Domain-aggregate
ACTA1	NM_001100.4(ACTA1):c.1000C>T (p.Pro334Ser)	Pathogenic	1	0	Domain-aggregate
ACTA1	NM_001100.4(ACTA1):c.442G>C (p.Gly148Arg)	Likely Pathogenic	1	1	Domain-aggregate
ACTA1	NM_001100.4(ACTA1):c.304G>A (p.Glu102Lys)	Likely Pathogenic	1	0	Domain-aggregate
ACTA1	NM_001100.4(ACTA1):c.1007A>C (p.Glu336Ala)	Likely Pathogenic	1	0	Domain-aggregate
ACTA1	NM_001100.4(ACTA1):c.443G>T (p.Gly148Val)	Likely Pathogenic	1	1	Domain-aggregate
ACTA1	NM_001100.4(ACTA1):c.175G>A (p.Glu59Lys)	Likely Pathogenic	1	0	Domain-aggregate
ACTA1	NM_001100.4(ACTA1):c.37G>A (p.Asp13Asn)	Likely Pathogenic	1	0	Domain-aggregate
ACTA1	NM_001100.4(ACTA1):c.1075A>C (p.Ile359Leu)	Pathogenic	1	0	Domain-aggregate
SHOC2	NM_007373.3(SHOC2):c.10A>C (p.Ser4Arg)	Benign	-1	-2	Domain-aggregate
SHOC2	NM_007373.3(SHOC2):c.519G>A (p.Met173Ile)	Pathogenic	1	1	Domain-aggregate
SHOC2	NM_007373.4(SHOC2):c.170C>T (p.Ser57Phe)	Uncertain Significance	0	0	Domain-aggregate
SHOC2	NM_007373.3(SHOC2):c.377C>T (p.Thr126Ile)	Likely Benign	0	-1	Domain-aggregate
SHOC2	NM_007373.3(SHOC2):c.610A>G (p.Ile204Val)	Benign	-1	-2	Domain-aggregate
SHOC2	NM_007373.3(SHOC2):c.38A>C (p.Glu13Ala)	Likely Benign	0	-2	Domain-aggregate
SHOC2	NM_007373.3(SHOC2):c.1594A>G (p.Ser532Gly)	Benign	0	-2	Domain-aggregate
SHOC2	NM_007373.3(SHOC2):c.613A>G (p.Thr205Ala)	Likely Benign	0	-1	Domain-aggregate
SHOC2	NM_007373.3(SHOC2):c.4A>G (p.Ser2Gly)	Pathogenic	0	0	Domain-aggregate
SGCD	NM_000337.6(SGCD):c.91C>T (p.Arg31Trp)	Uncertain Significance	1	1	Domain-aggregate
SERPINC1	NM_000488.4(SERPINC1):c.1246G>C (p.Ala416Pro)	Pathogenic	1	2	Domain-aggregate
SERPINC1	NM_000488.4(SERPINC1):c.592T>C (p.Tyr198His)	Uncertain Significance	1	3	Domain-aggregate
SERPINC1	NM_000488.4(SERPINC1):c.223G>A (p.Ala75Thr)	Uncertain Significance	-1	-2	Domain-aggregate
SERPINC1	NM_000488.3(SERPINC1):c.1315C>T (p.Pro439Ser)	Uncertain Significance	1	3	Domain-aggregate
SERPINC1	NM_000488.4(SERPINC1):c.29C>A (p.Thr10Asn)	Likely Benign	-1	-2	Domain-aggregate
SERPINC1	NM_000488.3(SERPINC1):c.1315C>A (p.Pro439Thr)	Pathogenic	1	3	Domain-aggregate
SERPINC1	NM_000488.4(SERPINC1):c.1274G>C (p.Arg425Pro)	Likely Pathogenic	1	3	Domain-aggregate
SERPINC1	NM_000488.4(SERPINC1):c.1277C>T (p.Ser426Leu)	Pathogenic	1	3	Domain-aggregate
SERPINC1	NM_000488.4(SERPINC1):c.299A>G (p.Asp100Gly)	Likely Benign	-1	-4	Domain-aggregate
SERPINC1	NM_000488.4(SERPINC1):c.719A>G (p.Asn240Ser)	Likely Benign	1	1	Domain-aggregate
SERPINC1	NM_000488.4(SERPINC1):c.235C>A (p.Arg79Ser)	Likely Pathogenic	1	2	Domain-aggregate
SERPINC1	NM_000488.3(SERPINC1):c.553A>G (p.Thr185Ala)	Likely Benign	-1	-4	Domain-aggregate
SERPINC1	NM_000488.3(SERPINC1):c.881G>A (p.Arg294His)	Likely Benign	-1	-4	Domain-aggregate
SERPINC1	NM_000488.4(SERPINC1):c.473T>C (p.Leu158Pro)	Uncertain Significance	1	3	Domain-aggregate
SERPINC1	NM_000488.4(SERPINC1):c.482G>A (p.Arg161Gln)	Pathogenic	1	0	Domain-aggregate
SERPINC1	NM_000488.4(SERPINC1):c.31T>A (p.Ser11Thr)	Uncertain Significance	-1	-3	Domain-aggregate
SERPINC1	NM_000488.4(SERPINC1):c.1301T>G (p.Phe434Cys)	Uncertain Significance	1	3	Domain-aggregate
SERPINC1	NM_000488.4(SERPINC1):c.89T>A (p.Val30Glu)	Pathogenic	0	0	Domain-aggregate
SERPINC1	NM_000488.4(SERPINC1):c.1376C>A (p.Ala459Asp)	Uncertain Significance	1	1	Domain-aggregate
SERPINC1	NM_000488.4(SERPINC1):c.1273C>T (p.Arg425Cys)	Pathogenic	1	3	Domain-aggregate
SERPINC1	NM_000488.4(SERPINC1):c.100G>A (p.Gly34Arg)	Uncertain Significance	-1	-2	Domain-aggregate
SERPINC1	NM_000488.4(SERPINC1):c.449A>C (p.Gln150Pro)	Likely Pathogenic	1	3	Domain-aggregate
SERPINC1	NM_000488.4(SERPINC1):c.536T>C (p.Phe179Ser)	Uncertain Significance	1	3	Domain-aggregate
SERPINC1	NM_000488.3(SERPINC1):c.218C>T (p.Pro73Leu)	Pathogenic	1	1	Domain-aggregate
SERPINC1	NM_000488.4(SERPINC1):c.1271G>A (p.Gly424Asp)	Uncertain Significance	1	0	Domain-aggregate
SERPINC1	NM_000488.4(SERPINC1):c.1141T>C (p.Ser381Pro)	Uncertain Significance	1	0	Domain-aggregate
SERPINC1	NM_000488.4(SERPINC1):c.17T>C (p.Ile6Thr)	Uncertain Significance	-1	-1	Domain-aggregate
SERPINC1	NM_000488.4(SERPINC1):c.1306G>A (p.Ala436Thr)	Likely Pathogenic	1	2	Domain-aggregate
SERPINC1	NM_000488.4(SERPINC1):c.47T>C (p.Val16Ala)	Likely Benign	-1	-2	Domain-aggregate
SERPINC1	NM_000488.4(SERPINC1):c.1316C>T (p.Pro439Leu)	Likely Pathogenic	1	3	Domain-aggregate
SERPINC1	NM_000488.4(SERPINC1):c.655A>G (p.Asn219Asp)	Pathogenic	1	3	Domain-aggregate
SERPINC1	NM_000488.3(SERPINC1):c.236G>A (p.Arg79His)	Pathogenic	1	2	Domain-aggregate
SERPINC1	NM_000488.3(SERPINC1):c.914C>A (p.Pro305His)	Benign	0	3	Domain-aggregate
SERPINC1	NM_000488.4(SERPINC1):c.1157T>C (p.Ile386Thr)	Pathogenic	1	1	Domain-aggregate
ENG	NM_001114753.3(ENG):c.1807G>A (p.Gly603Arg)	Likely Pathogenic	1	3	Domain-aggregate
ENG	NM_001114753.3(ENG):c.1316A>C (p.Lys439Thr)	Likely Benign	-1	-4	Domain-aggregate
ENG	NM_001114753.3(ENG):c.1961C>G (p.Thr654Ser)	Uncertain Significance	-1	-2	Domain-aggregate
ENG	NM_001114753.3(ENG):c.1645T>G (p.Cys549Gly)	Likely Pathogenic	1	3	Domain-aggregate
ENG	NM_001114753.3(ENG):c.1586G>A (p.Arg529His)	Pathogenic	0	0	Domain-aggregate
ENG	NM_001114753.3(ENG):c.991G>A (p.Gly331Ser)	Pathogenic	0	-2	Domain-aggregate
ENG	NM_001114753.3(ENG):c.1844C>T (p.Ser615Leu)	Likely Benign	0	-2	Domain-aggregate
ENG	NM_001114753.3(ENG):c.1510G>A (p.Val504Met)	Likely Benign	0	-1	Domain-aggregate
ENG	NM_001114753.3(ENG):c.1633G>A (p.Gly545Ser)	Likely Benign	0	0	Domain-aggregate
ENG	NM_001114753.3(ENG):c.392C>T (p.Pro131Leu)	Benign	0	-1	Domain-aggregate
ENG	NM_001114753.3(ENG):c.1160T>C (p.Leu387Pro)	Uncertain Significance	1	2	Domain-aggregate
ENG	NM_001114753.3(ENG):c.1762G>A (p.Val588Ile)	Likely Benign	-1	-3	Domain-aggregate
ENG	NM_001114753.3(ENG):c.662T>C (p.Leu221Pro)	Likely Pathogenic	0	0	Domain-aggregate
ENG	NM_001114753.3(ENG):c.447G>C (p.Trp149Cys)	Pathogenic	1	2	Domain-aggregate
ENG	NM_001114753.3(ENG):c.1319T>G (p.Val440Gly)	Likely Pathogenic	0	0	Domain-aggregate
ENG	NM_001114753.3(ENG):c.1268A>G (p.Asn423Ser)	Likely Pathogenic	0	0	Domain-aggregate
ENG	NM_001114753.3(ENG):c.1517T>A (p.Leu506His)	Likely Pathogenic	1	3	Domain-aggregate
ENG	NM_001114753.3(ENG):c.1447G>A (p.Val483Ile)	Likely Benign	-1	-4	Domain-aggregate
ENG	NM_001114753.3(ENG):c.1145G>A (p.Cys382Tyr)	Pathogenic	0	1	Domain-aggregate
DICER1	NM_177438.3(DICER1):c.179C>T (p.Thr60Ile)	Likely Benign	-1	0	Domain-aggregate
DICER1	NM_177438.3(DICER1):c.4357A>G (p.Ile1453Val)	Uncertain Significance	-1	0	Domain-aggregate
DICER1	NM_177438.3(DICER1):c.5438A>C (p.Glu1813Ala)	Uncertain Significance	1	2	Domain-aggregate
DICER1	NM_177438.3(DICER1):c.5452G>A (p.Ala1818Thr)	Uncertain Significance	1	2	Domain-aggregate
DICER1	NM_177438.3(DICER1):c.1792G>A (p.Glu598Lys)	Uncertain Significance	-1	-2	Domain-aggregate
DICER1	NM_177438.2(DICER1):c.5107C>T (p.Arg1703Cys)	Uncertain Significance	1	2	Domain-aggregate
DICER1	NM_177438.3(DICER1):c.1423A>T (p.Ser475Cys)	Uncertain Significance	0	0	Domain-aggregate
DICER1	NM_177438.3(DICER1):c.1047C>A (p.Asp349Glu)	Uncertain Significance	-1	-2	Domain-aggregate
DICER1	NM_177438.3(DICER1):c.5425G>A (p.Gly1809Arg)	Pathogenic	1	0	Domain-aggregate
DICER1	NM_177438.3(DICER1):c.1802T>C (p.Ile601Thr)	Likely Benign	-1	-3	Domain-aggregate
DICER1	NM_177438.3(DICER1):c.5428G>T (p.Asp1810Tyr)	Pathogenic	1	2	Domain-aggregate
DICER1	NM_177438.3(DICER1):c.2951A>G (p.Asn984Ser)	Likely Benign	-1	-1	Domain-aggregate
DICER1	NM_177438.3(DICER1):c.5729G>A (p.Arg1910Gln)	Uncertain Significance	-1	-1	Domain-aggregate
DICER1	NM_177438.3(DICER1):c.1430A>G (p.Asn477Ser)	Likely Benign	-1	-2	Domain-aggregate
DICER1	NM_177438.3(DICER1):c.1745T>C (p.Ile582Thr)	Uncertain Significance	-1	0	Domain-aggregate
DICER1	NM_177438.3(DICER1):c.1157A>G (p.Lys386Arg)	Likely Benign	-1	-2	Domain-aggregate
DICER1	NM_177438.3(DICER1):c.742T>A (p.Ser248Thr)	Likely Benign	-1	-2	Domain-aggregate
DICER1	NM_177438.3(DICER1):c.5173C>T (p.Arg1725Trp)	Uncertain Significance	1	0	Domain-aggregate
DICER1	NM_177438.3(DICER1):c.4874C>T (p.Ser1625Phe)	Uncertain Significance	-1	-3	Domain-aggregate
DICER1	NM_177438.3(DICER1):c.4449G>A (p.Met1483Ile)	Uncertain Significance	-1	-4	Domain-aggregate
DICER1	NM_177438.3(DICER1):c.4889G>T (p.Arg1630Leu)	Uncertain Significance	-1	-3	Domain-aggregate
DICER1	NM_177438.3(DICER1):c.4412C>T (p.Pro1471Leu)	Likely Benign	-1	-4	Domain-aggregate
DICER1	NM_177438.3(DICER1):c.2051T>C (p.Met684Thr)	Uncertain Significance	-1	0	Domain-aggregate
DICER1	NM_030621.4(DICER1):c.5138A>T (p.Asp1713Val)	Likely Pathogenic	1	2	Domain-aggregate
DICER1	NM_030621.4(DICER1):c.2642T>C (p.Leu881Pro)	Likely Pathogenic	1	3	Domain-aggregate
DICER1	NM_177438.3(DICER1):c.1381A>G (p.Ile461Val)	Benign	-1	-2	Domain-aggregate
DICER1	NM_177438.3(DICER1):c.646C>A (p.Pro216Thr)	Uncertain Significance	-1	-1	Domain-aggregate
DICER1	NM_177438.3(DICER1):c.5038A>G (p.Lys1680Glu)	Uncertain Significance	0	0	Domain-aggregate
DICER1	NM_177438.3(DICER1):c.4475T>C (p.Met1492Thr)	Likely Benign	-1	-4	Domain-aggregate
DICER1	NM_177438.3(DICER1):c.4775C>T (p.Pro1592Leu)	Uncertain Significance	0	1	Domain-aggregate
DICER1	NM_177438.3(DICER1):c.2516C>T (p.Ser839Phe)	Likely Pathogenic	0	0	Domain-aggregate
DICER1	NM_177438.3(DICER1):c.2774A>G (p.Glu925Gly)	Uncertain Significance	-1	-1	Domain-aggregate
DICER1	NM_177438.3(DICER1):c.192A>T (p.Leu64Phe)	Likely Benign	-1	0	Domain-aggregate
DICER1	NM_177438.3(DICER1):c.5465A>G (p.Asp1822Gly)	Likely Pathogenic	1	2	Domain-aggregate
DICER1	NM_177438.3(DICER1):c.5744A>G (p.Asn1915Ser)	Uncertain Significance	-1	-2	Domain-aggregate
DICER1	NM_177438.3(DICER1):c.1168T>C (p.Tyr390His)	Likely Benign	-1	-2	Domain-aggregate
DICER1	NM_177438.3(DICER1):c.1036T>G (p.Leu346Val)	Uncertain Significance	-1	-1	Domain-aggregate
DICER1	NM_177438.3(DICER1):c.925G>A (p.Val309Ile)	Likely Benign	-1	-2	Domain-aggregate
DICER1	NM_177438.3(DICER1):c.4376G>A (p.Gly1459Glu)	Likely Benign	-1	0	Domain-aggregate
DICER1	NM_177438.3(DICER1):c.818A>C (p.Glu273Ala)	Uncertain Significance	-1	-2	Domain-aggregate
DICER1	NM_177438.3(DICER1):c.5077C>A (p.His1693Asn)	Uncertain Significance	-1	-2	Domain-aggregate
DICER1	NM_177438.3(DICER1):c.5113G>A (p.Glu1705Lys)	Pathogenic	1	2	Domain-aggregate
DICER1	NM_177438.3(DICER1):c.4313A>G (p.Tyr1438Cys)	Uncertain Significance	-1	-2	Domain-aggregate
DICER1	NM_177438.3(DICER1):c.4283T>A (p.Met1428Lys)	Likely Benign	-1	-3	Domain-aggregate
DICER1	NM_177438.3(DICER1):c.4189T>C (p.Trp1397Arg)	Likely Benign	-1	-2	Domain-aggregate
DICER1	NM_177438.3(DICER1):c.1124C>G (p.Pro375Arg)	Benign	0	0	Domain-aggregate
DICER1	NM_177438.3(DICER1):c.2236A>G (p.Arg746Gly)	Uncertain Significance	-1	0	Domain-aggregate
DICER1	NM_177438.3(DICER1):c.2417C>T (p.Thr806Met)	Uncertain Significance	0	2	Domain-aggregate
DICER1	NM_177438.3(DICER1):c.2455T>C (p.Tyr819His)	Uncertain Significance	1	3	Domain-aggregate
DICER1	NM_177438.2(DICER1):c.4748T>G (p.Leu1583Arg)	Likely Pathogenic	1	3	Domain-aggregate
DICER1	NM_177438.3(DICER1):c.4478C>T (p.Pro1493Leu)	Uncertain Significance	-1	-4	Domain-aggregate
DICER1	NM_177438.3(DICER1):c.4691A>G (p.Glu1564Gly)	Uncertain Significance	1	4	Domain-aggregate
DICER1	NM_177438.3(DICER1):c.5656G>A (p.Gly1886Arg)	Uncertain Significance	0	0	Domain-aggregate
DICER1	NM_177438.3(DICER1):c.5422A>G (p.Met1808Val)	Uncertain Significance	0	0	Domain-aggregate
DICER1	NM_177438.3(DICER1):c.128C>T (p.Thr43Met)	Likely Benign	-1	0	Domain-aggregate
DICER1	NM_177438.3(DICER1):c.5171C>T (p.Pro1724Leu)	Uncertain Significance	-1	-2	Domain-aggregate
DICER1	NM_177438.3(DICER1):c.4874C>A (p.Ser1625Tyr)	Likely Benign	-1	-2	Domain-aggregate
DICER1	NM_177438.3(DICER1):c.3553G>A (p.Ala1185Thr)	Benign	-1	-3	Domain-aggregate
DICER1	NM_177438.3(DICER1):c.4740G>T (p.Gln1580His)	Likely Benign	0	2	Domain-aggregate
DICER1	NM_030621.4(DICER1):c.3828T>A (p.Asp1276Glu)	Likely Benign	-1	-3	Domain-aggregate
DICER1	NM_177438.2(DICER1):c.59C>T (p.Ala20Val)	Benign	-1	-1	Domain-aggregate
DICER1	NM_030621.4(DICER1):c.5125G>A (p.Asp1709Asn)	Pathogenic	1	1	Domain-aggregate
DICER1	NM_177438.2(DICER1):c.2614G>A (p.Ala872Thr)	Benign	-1	0	Domain-aggregate
DICER1	NM_177438.2(DICER1):c.1825G>T (p.Asp609Tyr)	Benign	-1	-2	Domain-aggregate
DICER1	NM_030621.4(DICER1):c.884C>G (p.Ser295Cys)	Benign	-1	-2	Domain-aggregate
DICER1	NM_030621.4(DICER1):c.5441C>T (p.Ser1814Leu)	Pathogenic	1	1	Domain-aggregate
DICER1	NM_177438.2(DICER1):c.4910C>T (p.Ser1637Leu)	Benign	-1	-3	Domain-aggregate
DICER1	NM_177438.2(DICER1):c.3428T>C (p.Leu1143Pro)	Benign	-1	-3	Domain-aggregate
DICER1	NM_177438.2(DICER1):c.5276A>G (p.Lys1759Arg)	Likely Benign	-1	-2	Domain-aggregate
DICER1	NM_177438.3(DICER1):c.5678T>C (p.Val1893Ala)	Uncertain Significance	-1	-1	Domain-aggregate
DICER1	NM_177438.3(DICER1):c.5641A>G (p.Thr1881Ala)	Uncertain Significance	-1	0	Domain-aggregate
DICER1	NM_177438.3(DICER1):c.4199A>G (p.Asp1400Gly)	Likely Benign	-1	-3	Domain-aggregate
DICER1	NM_177438.3(DICER1):c.5404A>G (p.Ile1802Val)	Uncertain Significance	-1	-3	Domain-aggregate
DICER1	NM_177438.3(DICER1):c.5486C>G (p.Thr1829Arg)	Uncertain Significance	-1	-1	Domain-aggregate
DICER1	NM_177438.3(DICER1):c.5248G>A (p.Val1750Ile)	Uncertain Significance	-1	-3	Domain-aggregate
DICER1	NM_177438.3(DICER1):c.5514G>A (p.Met1838Ile)	Uncertain Significance	0	0	Domain-aggregate
DICER1	NM_177438.3(DICER1):c.5382G>C (p.Glu1794Asp)	Uncertain Significance	-1	-3	Domain-aggregate
DICER1	NM_177438.3(DICER1):c.5470G>C (p.Gly1824Arg)	Uncertain Significance	0	0	Domain-aggregate
DICER1	NM_177438.3(DICER1):c.5308G>C (p.Asp1770His)	Uncertain Significance	-1	-2	Domain-aggregate
DICER1	NM_177438.3(DICER1):c.5761A>C (p.Asn1921His)	Uncertain Significance	-1	-2	Domain-aggregate
DICER1	NM_177438.3(DICER1):c.3161T>C (p.Leu1054Pro)	Uncertain Significance	1	1	Domain-aggregate
DICER1	NM_177438.3(DICER1):c.5509A>G (p.Met1837Val)	Uncertain Significance	0	0	Domain-aggregate
DICER1	NM_177438.3(DICER1):c.5259C>G (p.Asp1753Glu)	Uncertain Significance	0	0	Domain-aggregate
DICER1	NM_177438.3(DICER1):c.5375C>G (p.Ser1792Cys)	Uncertain Significance	-1	-2	Domain-aggregate
DICER1	NM_177438.3(DICER1):c.5428G>C (p.Asp1810His)	Uncertain Significance	1	2	Domain-aggregate
DICER1	NM_177438.3(DICER1):c.5438A>G (p.Glu1813Gly)	Uncertain Significance	1	2	Domain-aggregate
DICER1	NM_177438.3(DICER1):c.5516G>A (p.Arg1839Gln)	Likely Benign	-1	-1	Domain-aggregate
DICER1	NM_177438.3(DICER1):c.5515C>T (p.Arg1839Trp)	Uncertain Significance	-1	0	Domain-aggregate
DICER1	NM_177438.3(DICER1):c.5551C>T (p.Arg1851Cys)	Uncertain Significance	-1	0	Domain-aggregate
DICER1	NM_177438.3(DICER1):c.5257G>A (p.Asp1753Asn)	Uncertain Significance	-1	-2	Domain-aggregate
DICER1	NM_177438.3(DICER1):c.5623G>A (p.Asp1875Asn)	Likely Benign	-1	-1	Domain-aggregate
DICER1	NM_177438.3(DICER1):c.5626G>A (p.Gly1876Arg)	Uncertain Significance	-1	0	Domain-aggregate
DICER1	NM_177438.3(DICER1):c.5552G>A (p.Arg1851His)	Uncertain Significance	-1	0	Domain-aggregate
DICER1	NM_177438.3(DICER1):c.832C>T (p.Leu278Phe)	Uncertain Significance	-1	-1	Domain-aggregate
DICER1	NM_177438.3(DICER1):c.5504A>C (p.Tyr1835Ser)	Uncertain Significance	0	1	Domain-aggregate
DICER1	NM_177438.3(DICER1):c.5461A>G (p.Met1821Val)	Uncertain Significance	0	-1	Domain-aggregate
DICER1	NM_177438.3(DICER1):c.5282T>C (p.Val1761Ala)	Uncertain Significance	-1	-2	Domain-aggregate
RAF1	NM_002880.4(RAF1):c.119G>A (p.Arg40His)	Benign	-1	-1	Domain-aggregate
RAF1	NM_002880.3(RAF1):c.94A>G (p.Ile32Val)	Benign	-1	-2	Domain-aggregate
RAF1	NM_002880.3(RAF1):c.769T>C (p.Ser257Pro)	Likely Pathogenic	0	1	Domain-aggregate
RAF1	NM_002880.4(RAF1):c.1193G>T (p.Arg398Leu)	Uncertain Significance	1	1	Domain-aggregate
RAF1	NM_002880.3(RAF1):c.907A>G (p.Thr303Ala)	Likely Benign	0	-1	Domain-aggregate
RAF1	NM_002880.3(RAF1):c.125C>T (p.Ala42Val)	Likely Benign	0	-1	Domain-aggregate
RAF1	NM_002880.4(RAF1):c.768G>T (p.Arg256Ser)	Likely Pathogenic	0	1	Domain-aggregate
RAF1	NM_002880.3(RAF1):c.776C>A (p.Ser259Tyr)	Pathogenic	0	2	Domain-aggregate
RAF1	NM_002880.4(RAF1):c.1472C>T (p.Thr491Ile)	Pathogenic	1	1	Domain-aggregate
RAF1	NM_002880.4(RAF1):c.935T>C (p.Val312Ala)	Likely Benign	-1	-2	Domain-aggregate
RAF1	NM_002880.3(RAF1):c.788T>G (p.Val263Gly)	Pathogenic	1	2	Domain-aggregate
RAF1	NM_002880.3(RAF1):c.1082G>C (p.Gly361Ala)	Pathogenic	1	1	Domain-aggregate
RAF1	NM_002880.3(RAF1):c.124G>A (p.Ala42Thr)	Likely Benign	0	-1	Domain-aggregate
RAF1	NM_002880.3(RAF1):c.1141G>A (p.Asp381Asn)	Benign	0	-4	Domain-aggregate
RAF1	NM_002880.4(RAF1):c.1837C>G (p.Leu613Val)	Pathogenic	0	0	Domain-aggregate
RAF1	NM_002880.4(RAF1):c.775T>A (p.Ser259Thr)	Pathogenic	1	2	Domain-aggregate
RAF1	NM_001354689.3(RAF1):c.775T>G (p.Ser259Ala)	Pathogenic	0	1	Domain-aggregate
RAF1	NM_002880.3(RAF1):c.212A>G (p.Asn71Ser)	Benign	0	-2	Domain-aggregate
RAF1	NM_002880.3(RAF1):c.66T>G (p.Phe22Leu)	Likely Benign	0	-2	Domain-aggregate
RAF1	NM_002880.3(RAF1):c.770C>T (p.Ser257Leu)	Pathogenic	0	1	Domain-aggregate
RAF1	NM_002880.3(RAF1):c.781C>T (p.Pro261Ser)	Pathogenic	0	2	Domain-aggregate
RAF1	NM_002880.3(RAF1):c.923C>T (p.Pro308Leu)	Benign	0	0	Domain-aggregate
GJB2	NM_004004.6(GJB2):c.583A>G (p.Met195Val)	Pathogenic	1	2	Domain-aggregate
GJB2	NM_004004.6(GJB2):c.584T>C (p.Met195Thr)	Likely Pathogenic	1	2	Domain-aggregate
GJB2	NM_004004.6(GJB2):c.339T>G (p.Ser113Arg)	Uncertain Significance	0	-3	Domain-aggregate
GJB2	NM_004004.6(GJB2):c.677T>G (p.Val226Gly)	Uncertain Significance	0	0	Domain-aggregate
GJB2	NM_004004.6(GJB2):c.227T>C (p.Leu76Pro)	Likely Pathogenic	1	2	Domain-aggregate
GJB2	NM_004004.6(GJB2):c.488T>C (p.Met163Thr)	Uncertain Significance	1	2	Domain-aggregate
GJB2	NM_004004.6(GJB2):c.110T>C (p.Val37Ala)	Likely Pathogenic	1	-1	Domain-aggregate
GJB2	NM_004004.6(GJB2):c.56G>C (p.Ser19Thr)	Pathogenic	0	-1	Domain-aggregate
GJB2	NM_004004.6(GJB2):c.585G>C (p.Met195Ile)	Uncertain Significance	1	1	Domain-aggregate
GJB2	NM_004004.6(GJB2):c.107T>C (p.Leu36Pro)	Likely Pathogenic	1	2	Domain-aggregate
GJB2	NM_004004.6(GJB2):c.563A>G (p.Lys188Arg)	Likely Pathogenic	1	2	Domain-aggregate
GJB2	NM_004004.6(GJB2):c.34G>T (p.Gly12Cys)	Likely Pathogenic	1	0	Domain-aggregate
GJB2	NM_004004.5(GJB2):c.109G>A (p.Val37Ile)	Pathogenic	0	-1	Domain-aggregate
GJB2	NM_004004.5(GJB2):c.516G>C (p.Trp172Cys)	Pathogenic	1	-1	Domain-aggregate
GJB2	NM_004004.6(GJB2):c.23C>T (p.Thr8Met)	Uncertain Significance	0	-1	Domain-aggregate
PPP1CB	NM_002709.3(PPP1CB):c.166G>C (p.Ala56Pro)	Likely Pathogenic	0	0	Domain-aggregate
PPP1CB	NM_002709.3(PPP1CB):c.820G>A (p.Glu274Lys)	Likely Pathogenic	0	0	Domain-aggregate
PPP1CB	NM_002709.3(PPP1CB):c.548A>C (p.Glu183Ala)	Pathogenic	-1	-2	Domain-aggregate
PTPN11	NM_002834.4(PTPN11):c.1678C>T (p.Leu560Phe)	Likely Benign	0	-2	Domain-aggregate
PTPN11	NM_002834.5(PTPN11):c.188A>G (p.Tyr63Cys)	Pathogenic	1	2	Domain-aggregate
PTPN11	NM_002834.4(PTPN11):c.1658C>T (p.Thr553Met)	Benign	-1	-2	Domain-aggregate
PTPN11	NM_002834.5(PTPN11):c.417G>C (p.Glu139Asp)	Pathogenic	1	0	Domain-aggregate
PTPN11	NM_002834.4(PTPN11):c.155C>T (p.Thr52Ile)	Pathogenic	1	1	Domain-aggregate
PTPN11	NM_002834.4(PTPN11):c.127C>T (p.Leu43Phe)	Uncertain Significance	1	1	Domain-aggregate
PTPN11	NM_002834.4(PTPN11):c.782T>G (p.Leu261Arg)	Uncertain Significance	0	0	Domain-aggregate
PTPN11	NM_002834.4(PTPN11):c.1232C>T (p.Thr411Met)	Uncertain Significance	0	0	Domain-aggregate
PTPN11	NM_002834.4(PTPN11):c.392A>G (p.Lys131Arg)	Likely Benign	0	-3	Domain-aggregate
PTPN11	NM_002834.4(PTPN11):c.167T>C (p.Ile56Thr)	Likely Pathogenic	1	2	Domain-aggregate
PTPN11	NM_002834.4(PTPN11):c.53A>G (p.Asn18Ser)	Benign	0	-4	Domain-aggregate
PTPN11	NM_002834.4(PTPN11):c.782T>A (p.Leu261His)	Likely Pathogenic	0	0	Domain-aggregate
PTPN11	NM_002834.4(PTPN11):c.184T>G (p.Tyr62Asp)	Pathogenic	1	1	Domain-aggregate
PTPN11	NM_002834.4(PTPN11):c.205G>C (p.Glu69Gln)	Pathogenic	1	0	Domain-aggregate
PTPN11	NM_002834.4(PTPN11):c.1403C>T (p.Thr468Met)	Pathogenic	1	2	Domain-aggregate
PTPN11	NM_002834.4(PTPN11):c.925A>G (p.Ile309Val)	Benign	0	-1	Domain-aggregate
PTPN11	NM_002834.4(PTPN11):c.1052G>A (p.Arg351Gln)	Benign	0	-1	Domain-aggregate
PTPN11	NM_002834.5(PTPN11):c.209A>G (p.Lys70Arg)	Pathogenic	0	-1	Domain-aggregate
PTPN11	NM_002834.4(PTPN11):c.1510A>G (p.Met504Val)	Pathogenic	1	1	Domain-aggregate
PTPN11	NM_002834.4(PTPN11):c.781C>T (p.Leu261Phe)	Pathogenic	0	0	Domain-aggregate
PTPN11	NM_002834.4(PTPN11):c.1530G>C (p.Gln510His)	Pathogenic	1	1	Domain-aggregate
PTPN11	NM_002834.4(PTPN11):c.244A>G (p.Met82Val)	Uncertain Significance	0	0	Domain-aggregate
PTPN11	NM_002834.4(PTPN11):c.794G>A (p.Arg265Gln)	Pathogenic	0	2	Domain-aggregate
PTPN11	NM_002834.4(PTPN11):c.922A>G (p.Asn308Asp)	Pathogenic	1	0	Domain-aggregate
PTPN11	NM_002834.4(PTPN11):c.166A>G (p.Ile56Val)	Pathogenic	1	0	Domain-aggregate
PTPN11	NM_002834.4(PTPN11):c.1529A>C (p.Gln510Pro)	Pathogenic	1	4	Domain-aggregate
PTPN11	NM_002834.4(PTPN11):c.1028G>A (p.Arg343Gln)	Benign	0	-1	Domain-aggregate
ADA	NM_000022.4(ADA):c.984T>A (p.Asn328Lys)	Uncertain Significance	0	0	Domain-aggregate
[truncated: 2,234 more rows]

## Sheet: AlphaMissense
HGNC Gene Symbol	Variation	ClinGen Classification	ClinGen Evidence Point	Hybrid Calibration Evidence Point	Calibration Approach
ATM	NM_000051.4(ATM):c.6116A>T (p.Glu2039Val)	Uncertain Significance	0	2	Gene-specific
ATM	NM_000051.4(ATM):c.8678C>A (p.Ala2893Asp)	Uncertain Significance	1	4	Gene-specific
ATM	NM_000051.4(ATM):c.5858C>T (p.Thr1953Ile)	Uncertain Significance	1	1	Gene-specific
ATM	NM_000051.4(ATM):c.8520G>C (p.Leu2840Phe)	Uncertain Significance	0	-1	Gene-specific
ATM	NM_000051.4(ATM):c.590G>A (p.Gly197Glu)	Uncertain Significance	0	2	Gene-specific
ATM	NM_000051.4(ATM):c.7661A>G (p.His2554Arg)	Uncertain Significance	1	0	Gene-specific
ATM	NM_000051.3(ATM):c.3284G>A (p.Arg1095Lys)	Likely Pathogenic	0	0	Gene-specific
ATM	NM_000051.4(ATM):c.8480T>G (p.Phe2827Cys)	Likely Pathogenic	1	0	Gene-specific
ATM	NM_000051.4(ATM):c.4850T>C (p.Leu1617Pro)	Uncertain Significance	1	4	Gene-specific
ATM	NM_000051.4(ATM):c.4394T>C (p.Leu1465Pro)	Likely Pathogenic	1	3	Gene-specific
ATM	NM_000051.4(ATM):c.6530A>C (p.Gln2177Pro)	Uncertain Significance	1	2	Gene-specific
ATM	NM_000051.4(ATM):c.8494C>T (p.Arg2832Cys)	Likely Pathogenic	1	0	Gene-specific
ATM	NM_000051.4(ATM):c.2932T>C (p.Ser978Pro)	Benign	1	0	Gene-specific
ATM	NM_000051.3(ATM):c.2614C>T (p.Pro872Ser)	Benign	-1	-3	Gene-specific
ATM	NM_000051.3(ATM):c.8546G>C (p.Arg2849Pro)	Likely Pathogenic	1	4	Gene-specific
ATM	NM_000051.4(ATM):c.5236G>A (p.Gly1746Arg)	Pathogenic	0	3	Gene-specific
ATM	NM_000051.3(ATM):c.1073A>G (p.Asn358Ser)	Benign	-1	-3	Gene-specific
ATM	NM_000051.4(ATM):c.3137T>C (p.Leu1046Pro)	Likely Pathogenic	1	3	Gene-specific
ATM	NM_000051.3(ATM):c.6995T>C (p.Leu2332Pro)	Benign	-1	-1	Gene-specific
ATM	NM_000051.4(ATM):c.3925G>A (p.Ala1309Thr)	Benign	-1	-3	Gene-specific
ATM	NM_000051.4(ATM):c.875C>T (p.Pro292Leu)	Likely Pathogenic	1	0	Gene-specific
ATM	NM_000051.4(ATM):c.8300T>C (p.Leu2767Pro)	Likely Pathogenic	1	4	Gene-specific
ATM	NM_000051.3(ATM):c.146C>G (p.Ser49Cys)	Benign	0	-3	Gene-specific
ATM	NM_000051.3(ATM):c.3118A>G (p.Met1040Val)	Benign	-1	-2	Gene-specific
ATM	NM_000051.3(ATM):c.7919C>G (p.Thr2640Ser)	Uncertain Significance	0	-3	Gene-specific
ATM	NM_000051.4(ATM):c.7355T>C (p.Leu2452Pro)	Likely Pathogenic	1	2	Gene-specific
ATM	NM_000051.4(ATM):c.9103C>T (p.Leu3035Phe)	Likely Pathogenic	1	3	Gene-specific
ATM	NM_000051.4(ATM):c.7271T>G (p.Val2424Gly)	Pathogenic	1	0	Gene-specific
BMPR2	NM_001204.7(BMPR2):c.1016T>A (p.Val339Asp)	Uncertain Significance	1	4	Gene-specific
BMPR2	NM_001204.7(BMPR2):c.1157A>T (p.Glu386Val)	Likely Pathogenic	1	4	Gene-specific
BMPR2	NM_001204.7(BMPR2):c.1509A>C (p.Glu503Asp)	Likely Benign	0	-1	Gene-specific
BMPR2	NM_001204.7(BMPR2):c.1019T>C (p.Leu340Pro)	Uncertain Significance	1	4	Gene-specific
BMPR2	NM_001204.7(BMPR2):c.1126G>A (p.Glu376Lys)	Uncertain Significance	0	2	Gene-specific
BMPR2	NM_001204.7(BMPR2):c.1766A>G (p.Tyr589Cys)	Likely Benign	0	-1	Gene-specific
BMPR2	NM_001204.7(BMPR2):c.1472G>A (p.Arg491Gln)	Pathogenic	1	3	Gene-specific
BMPR2	NM_001204.7(BMPR2):c.797G>C (p.Arg266Thr)	Uncertain Significance	0	0	Gene-specific
BMPR2	NM_001204.7(BMPR2):c.1087C>G (p.Leu363Val)	Uncertain Significance	-1	-2	Gene-specific
BMPR2	NM_001204.7(BMPR2):c.1156G>A (p.Glu386Lys)	Likely Pathogenic	1	4	Gene-specific
BMPR2	NM_001204.7(BMPR2):c.1171G>A (p.Ala391Thr)	Likely Pathogenic	1	1	Gene-specific
BMPR2	NM_001204.7(BMPR2):c.100T>C (p.Cys34Arg)	Pathogenic	1	4	Gene-specific
BMPR2	NM_001204.7(BMPR2):c.2526G>T (p.Arg842Ser)	Uncertain Significance	0	-1	Gene-specific
BMPR2	NM_001204.7(BMPR2):c.908G>A (p.Arg303His)	Likely Pathogenic	0	-2	Gene-specific
BMPR2	NM_001204.7(BMPR2):c.1481C>T (p.Ala494Val)	Uncertain Significance	1	2	Gene-specific
BMPR2	NM_001204.7(BMPR2):c.2186G>C (p.Gly729Ala)	Likely Benign	0	-3	Gene-specific
BMPR2	NM_001204.7(BMPR2):c.1040G>A (p.Cys347Tyr)	Likely Pathogenic	1	3	Gene-specific
BMPR2	NM_001204.7(BMPR2):c.1157A>G (p.Glu386Gly)	Likely Pathogenic	1	3	Gene-specific
BMPR2	NM_001204.7(BMPR2):c.2656C>T (p.Arg886Cys)	Likely Benign	0	-1	Gene-specific
BMPR2	NM_001204.7(BMPR2):c.2618G>A (p.Arg873Gln)	Benign	0	-1	Gene-specific
BMPR2	NM_001204.7(BMPR2):c.1042G>A (p.Val348Ile)	Likely Benign	0	-1	Gene-specific
BMPR2	NM_001204.7(BMPR2):c.1037C>A (p.Thr346Asn)	Likely Benign	-1	-2	Gene-specific
BMPR2	NM_001204.7(BMPR2):c.1156G>C (p.Glu386Gln)	Likely Pathogenic	1	2	Gene-specific
BMPR2	NM_001204.7(BMPR2):c.1175T>C (p.Val392Ala)	Uncertain Significance	1	2	Gene-specific
BMPR2	NM_001204.7(BMPR2):c.354T>G (p.Cys118Trp)	Pathogenic	1	4	Gene-specific
BMPR2	NM_001204.7(BMPR2):c.2948G>A (p.Arg983Gln)	Likely Benign	0	-1	Gene-specific
BMPR2	NM_001204.7(BMPR2):c.545G>A (p.Gly182Asp)	Likely Benign	1	-1	Gene-specific
BMPR2	NM_001204.7(BMPR2):c.2887G>T (p.Gly963Cys)	Likely Benign	0	-3	Gene-specific
BMPR2	NM_001204.7(BMPR2):c.251G>A (p.Cys84Tyr)	Pathogenic	1	4	Gene-specific
BMPR2	NM_001204.7(BMPR2):c.1157A>C (p.Glu386Ala)	Likely Pathogenic	1	2	Gene-specific
BMPR2	NM_001204.7(BMPR2):c.276A>C (p.Gln92His)	Likely Benign	0	-1	Gene-specific
BMPR2	NM_001204.7(BMPR2):c.86A>G (p.Asn29Ser)	Likely Benign	0	-3	Gene-specific
BMPR2	NM_001204.7(BMPR2):c.932G>A (p.Gly311Glu)	Uncertain Significance	1	4	Gene-specific
BMPR2	NM_001204.7(BMPR2):c.220A>G (p.Lys74Glu)	Likely Benign	0	-2	Gene-specific
BMPR2	NM_001204.7(BMPR2):c.901T>C (p.Ser301Pro)	Pathogenic	0	0	Gene-specific
BMPR2	NM_001204.7(BMPR2):c.1259G>A (p.Cys420Tyr)	Likely Pathogenic	1	3	Gene-specific
BRAF	NM_004333.6(BRAF):c.1406G>A (p.Gly469Glu)	Pathogenic	1	4	Gene-specific
BRAF	NM_004333.6(BRAF):c.92C>G (p.Ala31Gly)	Likely Benign	-1	-2	Gene-specific
BRAF	NM_004333.6(BRAF):c.1455G>C (p.Leu485Phe)	Pathogenic	1	4	Gene-specific
BRAF	NM_004333.4(BRAF):c.739T>G (p.Phe247Val)	Likely Pathogenic	1	3	Gene-specific
BRAF	NM_004333.4(BRAF):c.976A>G (p.Ile326Val)	Benign	0	-2	Gene-specific
BRAF	NM_004333.4(BRAF):c.736G>C (p.Ala246Pro)	Pathogenic	1	4	Gene-specific
BRAF	NM_004333.4(BRAF):c.730A>C (p.Thr244Pro)	Pathogenic	1	0	Gene-specific
BRAF	NM_004333.6(BRAF):c.1411G>T (p.Val471Phe)	Pathogenic	1	4	Gene-specific
BRAF	NM_004333.6(BRAF):c.1796C>G (p.Thr599Arg)	Pathogenic	0	4	Gene-specific
BRAF	NM_004333.6(BRAF):c.1455G>T (p.Leu485Phe)	Pathogenic	1	4	Gene-specific
BRAF	NM_004333.4(BRAF):c.1595G>A (p.Cys532Tyr)	Likely Pathogenic	1	4	Gene-specific
BRAF	NM_004333.6(BRAF):c.793G>C (p.Gly265Arg)	Likely Pathogenic	1	1	Gene-specific
BRAF	NM_004333.6(BRAF):c.1799T>G (p.Val600Gly)	Pathogenic	1	0	Gene-specific
BRAF	NM_004333.6(BRAF):c.1796C>T (p.Thr599Ile)	Pathogenic	1	4	Gene-specific
BRAF	NM_004333.6(BRAF):c.1024A>G (p.Ile342Val)	Uncertain Significance	0	-2	Gene-specific
BRAF	NM_004333.6(BRAF):c.1391G>A (p.Gly464Glu)	Pathogenic	1	4	Gene-specific
BRAF	NM_004333.4(BRAF):c.968C>T (p.Ser323Leu)	Benign	0	-2	Gene-specific
BRAF	NM_004333.4(BRAF):c.1741A>G (p.Asn581Asp)	Pathogenic	1	1	Gene-specific
BRAF	NM_004333.6(BRAF):c.622A>G (p.Ile208Val)	Likely Benign	0	-2	Gene-specific
BRAF	NM_004333.6(BRAF):c.722C>A (p.Thr241Lys)	Pathogenic	1	4	Gene-specific
BRAF	NM_004333.6(BRAF):c.1454T>C (p.Leu485Ser)	Likely Pathogenic	1	4	Gene-specific
BRAF	NM_004333.4(BRAF):c.735A>C (p.Leu245Phe)	Pathogenic	1	3	Gene-specific
BRAF	NM_004333.4(BRAF):c.735A>T (p.Leu245Phe)	Pathogenic	1	3	Gene-specific
BRAF	NM_004333.4(BRAF):c.739T>C (p.Phe247Leu)	Pathogenic	1	4	Gene-specific
BRAF	NM_004333.4(BRAF):c.741T>G (p.Phe247Leu)	Pathogenic	1	4	Gene-specific
BRAF	NM_004333.5(BRAF):c.1150A>G (p.Arg384Gly)	Benign	0	-2	Gene-specific
BRAF	NM_004333.6(BRAF):c.1781A>T (p.Asp594Val)	Pathogenic	1	4	Gene-specific
BRAF	NM_004333.4(BRAF):c.1787G>T (p.Gly596Val)	Pathogenic	1	4	Gene-specific
BRAF	NM_004333.4(BRAF):c.1785T>G (p.Phe595Leu)	Pathogenic	1	4	Gene-specific
BRAF	NM_004333.4(BRAF):c.770A>G (p.Gln257Arg)	Pathogenic	1	1	Gene-specific
BRCA1	NM_007294.4(BRCA1):c.3082C>T (p.Arg1028Cys)	Benign	0	-3	Gene-specific
BRCA1	NM_007294.4(BRCA1):c.1233T>G (p.Asp411Glu)	Benign	0	-3	Gene-specific
BRCA1	NM_007294.4(BRCA1):c.191G>A (p.Cys64Tyr)	Pathogenic	1	4	Gene-specific
BRCA1	NM_007294.4(BRCA1):c.305C>G (p.Ala102Gly)	Benign	0	-3	Gene-specific
BRCA1	NM_007294.4(BRCA1):c.3418A>G (p.Ser1140Gly)	Benign	0	-3	Gene-specific
BRCA1	NM_007294.4(BRCA1):c.5089T>C (p.Cys1697Arg)	Pathogenic	1	4	Gene-specific
BRCA1	NM_007294.4(BRCA1):c.2155A>G (p.Lys719Glu)	Benign	0	-4	Gene-specific
BRCA1	NM_007294.4(BRCA1):c.5090G>A (p.Cys1697Tyr)	Likely Pathogenic	1	4	Gene-specific
BRCA1	NM_007294.4(BRCA1):c.811G>A (p.Val271Met)	Benign	0	-3	Gene-specific
BRCA1	NM_007294.4(BRCA1):c.5140G>T (p.Val1714Phe)	Likely Pathogenic	1	3	Gene-specific
BRCA1	NM_007294.4(BRCA1):c.122A>T (p.His41Leu)	Likely Pathogenic	1	4	Gene-specific
BRCA1	NM_007294.4(BRCA1):c.5075A>T (p.Asp1692Val)	Likely Pathogenic	1	3	Gene-specific
BRCA1	NM_007294.4(BRCA1):c.5332G>A (p.Asp1778Asn)	Pathogenic	0	-3	Gene-specific
BRCA1	NM_007294.4(BRCA1):c.5339T>G (p.Leu1780Arg)	Likely Pathogenic	1	4	Gene-specific
BRCA1	NM_007294.4(BRCA1):c.5257A>G (p.Arg1753Gly)	Likely Pathogenic	1	3	Gene-specific
BRCA1	NM_007294.4(BRCA1):c.121C>A (p.His41Asn)	Likely Pathogenic	1	4	Gene-specific
BRCA1	NM_007294.4(BRCA1):c.74C>T (p.Pro25Leu)	Likely Pathogenic	1	4	Gene-specific
BRCA1	NM_007294.4(BRCA1):c.4159T>C (p.Ser1387Pro)	Likely Benign	0	-3	Gene-specific
BRCA1	NM_007294.4(BRCA1):c.5252G>C (p.Arg1751Pro)	Likely Pathogenic	1	4	Gene-specific
BRCA1	NM_007294.4(BRCA1):c.5561T>C (p.Leu1854Pro)	Likely Pathogenic	1	3	Gene-specific
BRCA1	NM_007294.4(BRCA1):c.5282T>G (p.Phe1761Cys)	Likely Pathogenic	1	3	Gene-specific
BRCA1	NM_007294.4(BRCA1):c.5236C>G (p.His1746Asp)	Likely Pathogenic	1	4	Gene-specific
BRCA1	NM_007294.4(BRCA1):c.5242G>T (p.Gly1748Cys)	Likely Pathogenic	1	4	Gene-specific
BRCA1	NM_007294.4(BRCA1):c.5003T>C (p.Phe1668Ser)	Uncertain Significance	0	4	Gene-specific
BRCA1	NM_007294.4(BRCA1):c.5056C>T (p.His1686Tyr)	Likely Pathogenic	1	0	Gene-specific
BRCA1	NM_007294.4(BRCA1):c.5096G>C (p.Arg1699Pro)	Uncertain Significance	1	4	Gene-specific
BRCA1	NM_007294.4(BRCA1):c.4963T>C (p.Ser1655Pro)	Likely Pathogenic	1	4	Gene-specific
BRCA1	NM_007294.4(BRCA1):c.5200T>A (p.Phe1734Ile)	Likely Pathogenic	0	3	Gene-specific
BRCA1	NM_007294.4(BRCA1):c.5098A>G (p.Thr1700Ala)	Likely Pathogenic	1	3	Gene-specific
BRCA2	NM_000059.4(BRCA2):c.831T>G (p.Asn277Lys)	Benign	0	-2	Gene-specific
BRCA2	NM_000059.4(BRCA2):c.9227G>T (p.Gly3076Val)	Pathogenic	1	2	Gene-specific
BRCA2	NM_000059.4(BRCA2):c.8023A>G (p.Ile2675Val)	Pathogenic	0	-2	Gene-specific
BRCA2	NM_000059.4(BRCA2):c.663T>G (p.Phe221Leu)	Likely Benign	0	0	Gene-specific
BRCA2	NM_000059.4(BRCA2):c.8149G>T (p.Ala2717Ser)	Benign	-1	-3	Gene-specific
BRCA2	NM_000059.4(BRCA2):c.7796A>G (p.Glu2599Gly)	Likely Pathogenic	1	1	Gene-specific
BRCA2	NM_000059.4(BRCA2):c.2482T>C (p.Tyr828His)	Likely Benign	0	-3	Gene-specific
BRCA2	NM_000059.4(BRCA2):c.7759C>T (p.Leu2587Phe)	Benign	-1	0	Gene-specific
BRCA2	NM_000059.4(BRCA2):c.8059G>T (p.Val2687Phe)	Uncertain Significance	1	1	Gene-specific
BRCA2	NM_000059.4(BRCA2):c.9302T>C (p.Leu3101Pro)	Likely Pathogenic	1	4	Gene-specific
BRCA2	NM_000059.4(BRCA2):c.7970A>C (p.Lys2657Thr)	Uncertain Significance	0	4	Gene-specific
BRCA2	NM_000059.4(BRCA2):c.2471T>C (p.Leu824Ser)	Likely Benign	0	-3	Gene-specific
BRCA2	NM_000059.4(BRCA2):c.7787G>A (p.Gly2596Glu)	Likely Pathogenic	1	3	Gene-specific
BRCA2	NM_000059.4(BRCA2):c.8164A>G (p.Thr2722Ala)	Likely Pathogenic	1	0	Gene-specific
BRCA2	NM_000059.4(BRCA2):c.7857G>C (p.Trp2619Cys)	Likely Pathogenic	1	4	Gene-specific
BRCA2	NM_000059.4(BRCA2):c.8362T>C (p.Trp2788Arg)	Likely Pathogenic	1	4	Gene-specific
CDH23	NM_022124.6(CDH23):c.8083G>A (p.Asp2695Asn)	Uncertain Significance	1	4	Gene-specific
CDH23	NM_022124.6(CDH23):c.6614C>T (p.Pro2205Leu)	Uncertain Significance	0	2	Gene-specific
CDH23	NM_022124.6(CDH23):c.478G>A (p.Asp160Asn)	Uncertain Significance	1	4	Gene-specific
CDH23	NM_022124.6(CDH23):c.4000C>T (p.Arg1334Trp)	Uncertain Significance	0	-3	Gene-specific
CDH23	NM_022124.5(CDH23):c.3625A>G (p.Thr1209Ala)	Benign	-1	-3	Gene-specific
CDH23	NM_022124.6(CDH23):c.902G>A (p.Arg301Gln)	Uncertain Significance	0	0	Gene-specific
CDH23	NM_022124.6(CDH23):c.2263C>T (p.His755Tyr)	Benign	0	-3	Gene-specific
CDH23	NM_022124.6(CDH23):c.6866A>G (p.Asn2289Ser)	Uncertain Significance	1	0	Gene-specific
CDH23	NM_022124.5(CDH23):c.719C>T (p.Pro240Leu)	Pathogenic	0	3	Gene-specific
CDKL5	NM_001323289.2(CDKL5):c.1721C>T (p.Pro574Leu)	Benign	0	-4	Gene-specific
CDKL5	NM_001323289.2(CDKL5):c.761A>G (p.His254Arg)	Benign	0	-1	Gene-specific
CDKL5	NM_001323289.2(CDKL5):c.290T>C (p.Leu97Pro)	Likely Pathogenic	1	4	Gene-specific
CDKL5	NM_001323289.2(CDKL5):c.469G>C (p.Ala157Pro)	Likely Pathogenic	1	4	Gene-specific
CDKL5	NM_003159.2(CDKL5):c.1234A>G (p.Lys412Glu)	Likely Benign	-1	-4	Gene-specific
CDKL5	NM_001323289.2(CDKL5):c.2465G>A (p.Arg822His)	Likely Benign	-1	-4	Gene-specific
CDKL5	NM_001323289.2(CDKL5):c.239G>A (p.Arg80His)	Uncertain Significance	0	2	Gene-specific
CDKL5	NM_001323289.2(CDKL5):c.2318A>G (p.Glu773Gly)	Likely Benign	0	-4	Gene-specific
CDKL5	NM_001323289.2(CDKL5):c.871T>C (p.Cys291Arg)	Uncertain Significance	0	4	Gene-specific
CDKL5	NM_001323289.2(CDKL5):c.2107C>G (p.Leu703Val)	Likely Benign	0	-4	Gene-specific
CDKL5	NM_001323289.2(CDKL5):c.1579C>T (p.Pro527Ser)	Likely Benign	0	-4	Gene-specific
CDKL5	NM_001323289.2(CDKL5):c.194G>A (p.Arg65Gln)	Likely Benign	0	2	Gene-specific
CDKL5	NM_001323289.2(CDKL5):c.65G>A (p.Gly22Glu)	Likely Pathogenic	1	4	Gene-specific
CDKL5	NM_001323289.2(CDKL5):c.2546C>T (p.Ser849Leu)	Benign	0	-4	Gene-specific
CDKL5	NM_001323289.2(CDKL5):c.1523T>C (p.Ile508Thr)	Benign	-1	-4	Gene-specific
CDKL5	NM_003159.2(CDKL5):c.533G>A (p.Arg178Gln)	Pathogenic	0	4	Gene-specific
CDKL5	NM_003159.2(CDKL5):c.578A>G (p.Asp193Gly)	Likely Pathogenic	1	4	Gene-specific
CDKL5	NM_001323289.2(CDKL5):c.2086G>A (p.Ala696Thr)	Benign	-1	-4	Gene-specific
CDKL5	NM_001323289.2(CDKL5):c.470C>T (p.Ala157Val)	Likely Pathogenic	1	4	Gene-specific
CDKL5	NM_001323289.2(CDKL5):c.38T>C (p.Phe13Ser)	Likely Pathogenic	0	4	Gene-specific
CDKL5	NM_001323289.2(CDKL5):c.1892T>C (p.Ile631Thr)	Benign	0	-4	Gene-specific
CDKL5	NM_003159.2(CDKL5):c.119C>T (p.Ala40Val)	Pathogenic	1	4	Gene-specific
CDKL5	NM_001323289.2(CDKL5):c.1684A>G (p.Thr562Ala)	Likely Benign	-1	-4	Gene-specific
CDKL5	NM_001323289.2(CDKL5):c.454T>C (p.Cys152Arg)	Likely Pathogenic	1	4	Gene-specific
CDKL5	NM_001323289.2(CDKL5):c.2555C>T (p.Pro852Leu)	Benign	0	-4	Gene-specific
CDKL5	NM_001323289.2(CDKL5):c.1564T>G (p.Leu522Val)	Benign	0	-4	Gene-specific
CDKL5	NM_001323289.2(CDKL5):c.1064G>A (p.Arg355Gln)	Benign	0	-4	Gene-specific
CDKL5	NM_001323289.2(CDKL5):c.2243A>G (p.Asn748Ser)	Benign	0	-4	Gene-specific
CDKL5	NM_001323289.2(CDKL5):c.2200A>G (p.Thr734Ala)	Likely Benign	-1	-4	Gene-specific
CDKL5	NM_003159.2(CDKL5):c.215T>C (p.Ile72Thr)	Pathogenic	1	2	Gene-specific
CDKL5	NM_001323289.2(CDKL5):c.530A>G (p.Tyr177Cys)	Uncertain Significance	1	4	Gene-specific
CDKL5	NM_001323289.2(CDKL5):c.1768G>A (p.Glu590Lys)	Benign	0	-1	Gene-specific
CDKL5	NM_001323289.2(CDKL5):c.1930C>T (p.Leu644Phe)	Uncertain Significance	0	-2	Gene-specific
CDKL5	NM_001323289.2(CDKL5):c.872G>A (p.Cys291Tyr)	Uncertain Significance	0	2	Gene-specific
CDKL5	NM_001323289.2(CDKL5):c.89G>A (p.Cys30Tyr)	Uncertain Significance	0	4	Gene-specific
CDKL5	NM_003159.2(CDKL5):c.1196A>C (p.Asn399Thr)	Likely Benign	-1	-4	Gene-specific
CDKL5	NM_001323289.2(CDKL5):c.2684C>T (p.Pro895Leu)	Uncertain Significance	-1	-4	Gene-specific
CDKL5	NM_001323289.2(CDKL5):c.199C>T (p.Leu67Phe)	Uncertain Significance	1	2	Gene-specific
CDKL5	NM_001323289.2(CDKL5):c.514G>A (p.Val172Ile)	Uncertain Significance	0	0	Gene-specific
CDKL5	NM_001323289.2(CDKL5):c.2152G>A (p.Val718Met)	Pathogenic	0	0	Gene-specific
CDKL5	NM_001323289.2(CDKL5):c.2194G>A (p.Val732Met)	Uncertain Significance	-1	-4	Gene-specific
CDKL5	NM_001323289.2(CDKL5):c.1612A>G (p.Thr538Ala)	Likely Benign	-1	-4	Gene-specific
ENG	NM_001114753.3(ENG):c.991G>A (p.Gly331Ser)	Pathogenic	0	-2	Gene-specific
ENG	NM_001114753.3(ENG):c.572G>A (p.Gly191Asp)	Benign	0	0	Gene-specific
ENG	NM_001114753.3(ENG):c.392C>T (p.Pro131Leu)	Benign	0	-2	Gene-specific
ENG	NM_001114753.3(ENG):c.1160T>C (p.Leu387Pro)	Uncertain Significance	1	4	Gene-specific
ENG	NM_001114753.3(ENG):c.662T>C (p.Leu221Pro)	Likely Pathogenic	0	4	Gene-specific
ENG	NM_001114753.3(ENG):c.447G>C (p.Trp149Cys)	Pathogenic	1	4	Gene-specific
ENG	NM_001114753.3(ENG):c.1268A>G (p.Asn423Ser)	Likely Pathogenic	0	0	Gene-specific
ENG	NM_001114753.3(ENG):c.1145G>A (p.Cys382Tyr)	Pathogenic	0	4	Gene-specific
F8	NM_000132.3(F8):c.980T>C (p.Leu327Pro)	Likely Pathogenic	1	4	Gene-specific
F8	NM_000132.4(F8):c.5303G>A (p.Arg1768His)	Pathogenic	1	-2	Gene-specific
F8	NM_000132.3(F8):c.2947G>A (p.Val983Ile)	Benign	-1	-4	Gene-specific
F8	NM_000132.3(F8):c.2215G>A (p.Glu739Lys)	Pathogenic	1	-3	Gene-specific
F8	NM_000132.3(F8):c.1508G>A (p.Arg503His)	Benign	0	-4	Gene-specific
F8	NM_000132.4(F8):c.5186G>A (p.Gly1729Glu)	Likely Pathogenic	1	1	Gene-specific
F8	NM_000132.4(F8):c.2453C>T (p.Thr818Ile)	Benign	0	-3	Gene-specific
F8	NM_000132.3(F8):c.923C>T (p.Ser308Leu)	Pathogenic	1	0	Gene-specific
F8	NM_000132.3(F8):c.6769A>G (p.Met2257Val)	Benign	-1	-4	Gene-specific
F8	NM_000132.4(F8):c.6724G>A (p.Val2242Met)	Benign	0	-2	Gene-specific
F8	NM_000132.4(F8):c.5815G>C (p.Ala1939Pro)	Uncertain Significance	1	4	Gene-specific
F8	NM_000132.4(F8):c.1834C>T (p.Arg612Cys)	Pathogenic	1	0	Gene-specific
F8	NM_000132.3(F8):c.1214T>G (p.Ile405Ser)	Likely Pathogenic	1	4	Gene-specific
F8	NM_000132.3(F8):c.5822A>G (p.Asn1941Ser)	Pathogenic	1	2	Gene-specific
F8	NM_000132.3(F8):c.1660A>G (p.Ser554Gly)	Pathogenic	1	4	Gene-specific
F8	NM_000132.4(F8):c.2961G>C (p.Glu987Asp)	Likely Benign	-1	-3	Gene-specific
F8	NM_000132.4(F8):c.4828G>T (p.Ala1610Ser)	Likely Benign	0	-4	Gene-specific
F8	NM_000132.4(F8):c.3280G>A (p.Glu1094Lys)	Benign	0	-3	Gene-specific
F8	NM_000132.4(F8):c.2840C>G (p.Pro947Arg)	Likely Benign	0	-4	Gene-specific
F8	NM_000132.4(F8):c.3169G>A (p.Glu1057Lys)	Benign	1	-4	Gene-specific
F8	NM_000132.4(F8):c.5063C>T (p.Ser1688Leu)	Likely Benign	1	-4	Gene-specific
F8	NM_000132.4(F8):c.7021G>A (p.Glu2341Lys)	Likely Pathogenic	1	4	Gene-specific
F8	NM_000132.4(F8):c.2212T>G (p.Tyr738Asp)	Benign	0	-4	Gene-specific
F8	NM_000132.4(F8):c.1468A>G (p.Arg490Gly)	Likely Pathogenic	1	4	Gene-specific
F8	NM_000132.4(F8):c.1030A>C (p.Lys344Gln)	Uncertain Significance	1	-1	Gene-specific
F8	NM_000132.4(F8):c.6623A>G (p.Gln2208Arg)	Likely Pathogenic	1	0	Gene-specific
F8	NM_000132.4(F8):c.6658G>C (p.Ala2220Pro)	Pathogenic	1	4	Gene-specific
FBN1	NM_000138.5(FBN1):c.1147G>A (p.Glu383Lys)	Likely Pathogenic	1	-3	Gene-specific
FBN1	NM_000138.5(FBN1):c.6491G>A (p.Cys2164Tyr)	Pathogenic	1	3	Gene-specific
FBN1	NM_000138.5(FBN1):c.6724C>T (p.Arg2242Cys)	Uncertain Significance	0	0	Gene-specific
FBN1	NM_000138.5(FBN1):c.7726C>T (p.Arg2576Cys)	Pathogenic	0	1	Gene-specific
FBN1	NM_000138.5(FBN1):c.7775G>T (p.Cys2592Phe)	Pathogenic	1	3	Gene-specific
FBN1	NM_000138.5(FBN1):c.7892G>A (p.Cys2631Tyr)	Pathogenic	1	3	Gene-specific
FBN1	NM_000138.5(FBN1):c.8002G>T (p.Gly2668Cys)	Likely Pathogenic	1	3	Gene-specific
FBN1	NM_000138.5(FBN1):c.8378A>G (p.Tyr2793Cys)	Likely Pathogenic	1	2	Gene-specific
FBN1	NM_000138.5(FBN1):c.5518C>T (p.Arg1840Cys)	Likely Pathogenic	1	0	Gene-specific
FBN1	NM_000138.5(FBN1):c.5747G>A (p.Cys1916Tyr)	Likely Pathogenic	1	4	Gene-specific
FBN1	NM_000138.5(FBN1):c.4330T>A (p.Cys1444Ser)	Pathogenic	1	3	Gene-specific
FBN1	NM_000138.5(FBN1):c.338C>G (p.Ser113Cys)	Likely Pathogenic	0	0	Gene-specific
FBN1	NM_000138.5(FBN1):c.3290G>A (p.Cys1097Tyr)	Pathogenic	1	3	Gene-specific
FBN1	NM_000138.5(FBN1):c.2660G>A (p.Cys887Tyr)	Likely Pathogenic	1	3	Gene-specific
FBN1	NM_000138.5(FBN1):c.1481G>C (p.Cys494Ser)	Likely Pathogenic	1	4	Gene-specific
FBN1	NM_000138.5(FBN1):c.1453C>T (p.Arg485Cys)	Pathogenic	0	0	Gene-specific
FBN1	NM_000138.5(FBN1):c.79G>A (p.Ala27Thr)	Benign	-1	-4	Gene-specific
FBN1	NM_000138.5(FBN1):c.3677G>T (p.Gly1226Val)	Uncertain Significance	1	2	Gene-specific
FBN1	NM_000138.5(FBN1):c.3712G>A (p.Asp1238Asn)	Pathogenic	1	1	Gene-specific
FBN1	NM_000138.5(FBN1):c.7409G>T (p.Cys2470Phe)	Likely Pathogenic	1	3	Gene-specific
FBN1	NM_000138.5(FBN1):c.5743C>T (p.Arg1915Cys)	Pathogenic	0	0	Gene-specific
FBN1	NM_000138.5(FBN1):c.3707G>A (p.Cys1236Tyr)	Pathogenic	1	3	Gene-specific
FBN1	NM_000138.5(FBN1):c.3409C>T (p.Arg1137Cys)	Uncertain Significance	0	-1	Gene-specific
FBN1	NM_000138.5(FBN1):c.2287T>G (p.Cys763Gly)	Pathogenic	1	2	Gene-specific
FBN1	NM_000138.5(FBN1):c.2287T>C (p.Cys763Arg)	Likely Pathogenic	1	4	Gene-specific
FBN1	NM_000138.5(FBN1):c.188A>G (p.Tyr63Cys)	Uncertain Significance	0	0	Gene-specific
FBN1	NM_000138.5(FBN1):c.4414T>C (p.Cys1472Arg)	Pathogenic	1	4	Gene-specific
FBN1	NM_000138.5(FBN1):c.1630G>A (p.Gly544Arg)	Pathogenic	1	4	Gene-specific
FBN1	NM_000138.5(FBN1):c.6446A>G (p.Tyr2149Cys)	Pathogenic	1	0	Gene-specific
FBN1	NM_000138.5(FBN1):c.6032G>A (p.Cys2011Tyr)	Likely Pathogenic	1	3	Gene-specific
FBN1	NM_000138.5(FBN1):c.4526A>G (p.Tyr1509Cys)	Likely Pathogenic	1	1	Gene-specific
FBN1	NM_000138.5(FBN1):c.4405C>T (p.Arg1469Cys)	Uncertain Significance	1	0	Gene-specific
FBN1	NM_000138.5(FBN1):c.4081T>C (p.Cys1361Arg)	Likely Pathogenic	1	3	Gene-specific
FBN1	NM_000138.5(FBN1):c.1390C>T (p.Arg464Cys)	Likely Pathogenic	0	-1	Gene-specific
FBN1	NM_000138.5(FBN1):c.7540G>A (p.Gly2514Arg)	Pathogenic	0	2	Gene-specific
FBN1	NM_000138.5(FBN1):c.3428G>A (p.Gly1143Asp)	Uncertain Significance	1	1	Gene-specific
FBN1	NM_000138.5(FBN1):c.1634G>A (p.Arg545His)	Uncertain Significance	1	-2	Gene-specific
FBN1	NM_000138.5(FBN1):c.6448C>T (p.Arg2150Cys)	Pathogenic	1	1	Gene-specific
FBN1	NM_000138.5(FBN1):c.6662G>A (p.Cys2221Tyr)	Pathogenic	1	4	Gene-specific
FBN1	NM_000138.5(FBN1):c.6820T>C (p.Cys2274Arg)	Likely Pathogenic	1	3	Gene-specific
FBN1	NM_000138.5(FBN1):c.7763A>G (p.Tyr2588Cys)	Uncertain Significance	1	2	Gene-specific
FBN1	NM_000138.5(FBN1):c.3476G>A (p.Cys1159Tyr)	Pathogenic	1	3	Gene-specific
FBN1	NM_000138.5(FBN1):c.6185A>G (p.Tyr2062Cys)	Uncertain Significance	0	2	Gene-specific
FBN1	NM_000138.5(FBN1):c.911G>A (p.Cys304Tyr)	Likely Pathogenic	1	3	Gene-specific
FBN1	NM_000138.5(FBN1):c.5885A>G (p.Tyr1962Cys)	Likely Pathogenic	1	2	Gene-specific
FBN1	NM_000138.5(FBN1):c.4280A>G (p.Tyr1427Cys)	Likely Pathogenic	1	1	Gene-specific
FBN1	NM_000138.5(FBN1):c.3557A>G (p.Tyr1186Cys)	Pathogenic	1	1	Gene-specific
FBN1	NM_000138.5(FBN1):c.3457T>C (p.Cys1153Arg)	Likely Pathogenic	1	4	Gene-specific
FBN1	NM_000138.5(FBN1):c.1708T>C (p.Cys570Arg)	Pathogenic	1	4	Gene-specific
FBN1	NM_000138.5(FBN1):c.1556A>G (p.Tyr519Cys)	Pathogenic	1	1	Gene-specific
FBN1	NM_000138.5(FBN1):c.1030C>T (p.Arg344Cys)	Likely Pathogenic	1	0	Gene-specific
FBN1	NM_000138.5(FBN1):c.3554G>A (p.Gly1185Asp)	Likely Pathogenic	1	2	Gene-specific
FBN1	NM_000138.5(FBN1):c.3650G>A (p.Gly1217Asp)	Likely Pathogenic	1	1	Gene-specific
FBN1	NM_000138.5(FBN1):c.6410G>A (p.Cys2137Tyr)	Pathogenic	1	3	Gene-specific
FBN1	NM_000138.5(FBN1):c.6541T>C (p.Cys2181Arg)	Likely Pathogenic	1	3	Gene-specific
FBN1	NM_000138.5(FBN1):c.6866G>C (p.Cys2289Ser)	Likely Pathogenic	1	3	Gene-specific
FBN1	NM_000138.5(FBN1):c.7016G>A (p.Cys2339Tyr)	Likely Pathogenic	1	3	Gene-specific
FBN1	NM_000138.5(FBN1):c.5558G>A (p.Cys1853Tyr)	Pathogenic	1	3	Gene-specific
FBN1	NM_000138.5(FBN1):c.5966G>T (p.Cys1989Phe)	Pathogenic	1	3	Gene-specific
FBN1	NM_000138.5(FBN1):c.4409G>A (p.Cys1470Tyr)	Pathogenic	1	3	Gene-specific
FBN1	NM_000138.5(FBN1):c.3508C>T (p.Arg1170Cys)	Uncertain Significance	0	-1	Gene-specific
FBN1	NM_000138.5(FBN1):c.2624G>A (p.Cys875Tyr)	Likely Pathogenic	1	4	Gene-specific
FBN1	NM_000138.5(FBN1):c.199T>C (p.Cys67Arg)	Likely Pathogenic	1	4	Gene-specific
FBN1	NM_000138.5(FBN1):c.1825C>T (p.Arg609Cys)	Uncertain Significance	1	1	Gene-specific
FBN1	NM_000138.5(FBN1):c.1850G>A (p.Cys617Tyr)	Pathogenic	1	4	Gene-specific
FBN1	NM_000138.5(FBN1):c.1379G>A (p.Cys460Tyr)	Likely Pathogenic	1	3	Gene-specific
FBN1	NM_000138.5(FBN1):c.1538G>T (p.Cys513Phe)	Likely Pathogenic	1	2	Gene-specific
FBN1	NM_000138.5(FBN1):c.7577A>G (p.Asn2526Ser)	Likely Pathogenic	1	-4	Gene-specific
FBN1	NM_000138.5(FBN1):c.3509G>A (p.Arg1170His)	Benign	0	-4	Gene-specific
FBN1	NM_000138.5(FBN1):c.5443G>A (p.Gly1815Ser)	Uncertain Significance	0	-4	Gene-specific
FBN1	NM_000138.4(FBN1):c.985A>G (p.Ile329Val)	Likely Benign	-1	-4	Gene-specific
FBN1	NM_000138.5(FBN1):c.3689T>C (p.Met1230Thr)	Likely Benign	0	0	Gene-specific
FBN1	NM_000138.4(FBN1):c.629G>A (p.Cys210Tyr)	Likely Pathogenic	1	4	Gene-specific
FBN1	NM_000138.5(FBN1):c.4640C>T (p.Thr1547Ile)	Benign	0	-4	Gene-specific
FBN1	NM_000138.5(FBN1):c.4466A>G (p.Asn1489Ser)	Uncertain Significance	0	-3	Gene-specific
FBN1	NM_000138.4(FBN1):c.8363C>T (p.Thr2788Met)	Benign	0	-4	Gene-specific
FBN1	NM_000138.5(FBN1):c.7003C>T (p.Arg2335Trp)	Likely Pathogenic	1	0	Gene-specific
FBN1	NM_000138.4(FBN1):c.4459G>A (p.Asp1487Asn)	Pathogenic	1	1	Gene-specific
FBN1	NM_000138.5(FBN1):c.3058A>G (p.Thr1020Ala)	Likely Benign	0	-4	Gene-specific
FBN1	NM_000138.5(FBN1):c.3422C>T (p.Pro1141Leu)	Benign	0	-3	Gene-specific
FOXG1	NM_005249.5(FOXG1):c.344C>T (p.Ala115Val)	Benign	-1	-2	Gene-specific
FOXG1	NM_005249.5(FOXG1):c.218A>C (p.Gln73Pro)	Benign	-1	-3	Gene-specific
FOXG1	NM_005249.5(FOXG1):c.251C>A (p.Pro84His)	Benign	-1	-2	Gene-specific
FOXG1	NM_005249.5(FOXG1):c.209A>C (p.Gln70Pro)	Benign	-1	-3	Gene-specific
FOXG1	NM_005249.5(FOXG1):c.1045T>G (p.Ser349Ala)	Likely Benign	0	-2	Gene-specific
FOXG1	NM_005249.5(FOXG1):c.227C>T (p.Pro76Leu)	Likely Benign	-1	-2	Gene-specific
FOXG1	NM_005249.5(FOXG1):c.565C>G (p.Leu189Val)	Likely Pathogenic	1	4	Gene-specific
FOXG1	NM_005249.5(FOXG1):c.620T>C (p.Ile207Thr)	Likely Pathogenic	1	4	Gene-specific
FOXG1	NM_005249.5(FOXG1):c.1273T>C (p.Ser425Pro)	Benign	0	-1	Gene-specific
FOXG1	NM_005249.5(FOXG1):c.221C>A (p.Pro74Gln)	Benign	-1	-2	Gene-specific
FOXG1	NM_005249.5(FOXG1):c.1384A>G (p.Ser462Gly)	Benign	0	-2	Gene-specific
FOXG1	NM_005249.5(FOXG1):c.455G>C (p.Gly152Ala)	Benign	-1	-2	Gene-specific
FOXG1	NM_005249.5(FOXG1):c.977G>A (p.Ser326Asn)	Likely Benign	0	-1	Gene-specific
FOXG1	NM_005249.5(FOXG1):c.382G>T (p.Gly128Cys)	Likely Benign	0	-1	Gene-specific
FOXG1	NM_005249.5(FOXG1):c.376G>A (p.Gly126Ser)	Benign	0	-2	Gene-specific
FOXG1	NM_005249.5(FOXG1):c.503G>T (p.Gly168Val)	Uncertain Significance	0	-2	Gene-specific
FOXG1	NM_005249.5(FOXG1):c.275C>T (p.Ala92Val)	Likely Benign	-1	-2	Gene-specific
FOXG1	NM_005249.5(FOXG1):c.245C>A (p.Pro82Gln)	Benign	-1	-2	Gene-specific
FOXG1	NM_005249.5(FOXG1):c.268G>T (p.Ala90Ser)	Benign	-1	-2	Gene-specific
FOXG1	NM_005249.5(FOXG1):c.953A>T (p.His318Leu)	Uncertain Significance	0	-1	Gene-specific
FOXG1	NM_005249.5(FOXG1):c.263G>A (p.Arg88Gln)	Likely Benign	-1	-2	Gene-specific
FOXG1	NM_005249.5(FOXG1):c.681C>G (p.Asn227Lys)	Uncertain Significance	1	4	Gene-specific
FOXG1	NM_005249.5(FOXG1):c.256C>A (p.Gln86Lys)	Likely Benign	-1	-2	Gene-specific
FOXG1	NM_005249.5(FOXG1):c.685A>C (p.Ile229Leu)	Likely Pathogenic	1	0	Gene-specific
FOXG1	NM_005249.5(FOXG1):c.503G>C (p.Gly168Ala)	Benign	-1	-2	Gene-specific
FOXG1	NM_005249.5(FOXG1):c.573G>A (p.Met191Ile)	Likely Pathogenic	1	4	Gene-specific
FOXG1	NM_005249.5(FOXG1):c.706A>G (p.Asn236Asp)	Likely Pathogenic	1	4	Gene-specific
FOXG1	NM_005249.5(FOXG1):c.748G>A (p.Gly250Ser)	Likely Pathogenic	1	4	Gene-specific
FOXG1	NM_005249.5(FOXG1):c.670G>A (p.Gly224Ser)	Likely Pathogenic	1	4	Gene-specific
FOXG1	NM_005249.5(FOXG1):c.471G>T (p.Lys157Asn)	Likely Benign	-1	0	Gene-specific
FOXG1	NM_005249.5(FOXG1):c.326C>T (p.Pro109Leu)	Likely Benign	-1	-2	Gene-specific
FOXG1	NM_005249.4(FOXG1):c.561C>A (p.Asn187Lys)	Pathogenic	0	4	Gene-specific
FOXG1	NM_005249.5(FOXG1):c.131A>C (p.His44Pro)	Likely Benign	-1	-2	Gene-specific
FOXG1	NM_005249.5(FOXG1):c.310C>T (p.Leu104Phe)	Uncertain Significance	-1	-2	Gene-specific
IL2RG	NM_000206.3(IL2RG):c.655T>C (p.Tyr219His)	Uncertain Significance	0	2	Gene-specific
IL2RG	NM_000206.3(IL2RG):c.325G>A (p.Glu109Lys)	Benign	0	-4	Gene-specific
IL2RG	NM_000206.3(IL2RG):c.1105A>G (p.Thr369Ala)	Uncertain Significance	0	-4	Gene-specific
IL2RG	NM_000206.3(IL2RG):c.406C>T (p.Arg136Trp)	Likely Benign	0	-3	Gene-specific
IL2RG	NM_000206.3(IL2RG):c.184T>C (p.Cys62Arg)	Pathogenic	0	3	Gene-specific
IL2RG	NM_000206.3(IL2RG):c.677G>A (p.Arg226His)	Pathogenic	0	0	Gene-specific
IL2RG	NM_000206.3(IL2RG):c.676C>T (p.Arg226Cys)	Pathogenic	0	1	Gene-specific
IL2RG	NM_000206.3(IL2RG):c.664C>T (p.Arg222Cys)	Pathogenic	0	0	Gene-specific
IL2RG	NM_000206.3(IL2RG):c.821T>C (p.Ile274Thr)	Uncertain Significance	0	0	Gene-specific
IL2RG	NM_000206.3(IL2RG):c.460C>T (p.Pro154Ser)	Uncertain Significance	0	2	Gene-specific
IL2RG	NM_000206.3(IL2RG):c.1061A>G (p.His354Arg)	Likely Benign	0	-4	Gene-specific
IL2RG	NM_000206.3(IL2RG):c.184T>A (p.Cys62Ser)	Likely Pathogenic	0	3	Gene-specific
IL2RG	NM_000206.3(IL2RG):c.670C>T (p.Arg224Trp)	Pathogenic	0	1	Gene-specific
IL2RG	NM_000206.3(IL2RG):c.332T>C (p.Ile111Thr)	Likely Benign	0	0	Gene-specific
IL2RG	NM_000206.3(IL2RG):c.977G>A (p.Ser326Asn)	Likely Benign	0	0	Gene-specific
IL2RG	NM_000206.3(IL2RG):c.694G>A (p.Gly232Arg)	Uncertain Significance	0	2	Gene-specific
IL2RG	NM_000206.3(IL2RG):c.545G>A (p.Cys182Tyr)	Likely Pathogenic	0	3	Gene-specific
IL2RG	NM_000206.3(IL2RG):c.311A>T (p.His104Leu)	Likely Benign	0	-1	Gene-specific
IL2RG	NM_000206.3(IL2RG):c.292A>G (p.Lys98Glu)	Uncertain Significance	0	-3	Gene-specific
MLH1	NM_000249.4(MLH1):c.2041G>C (p.Ala681Pro)	Uncertain Significance	0	2	Gene-specific
MLH1	NM_000249.4(MLH1):c.1889T>A (p.Ile630Asn)	Uncertain Significance	2	1	Gene-specific
MLH1	NM_000249.4(MLH1):c.2042C>T (p.Ala681Val)	Uncertain Significance	0	1	Gene-specific
MLH1	NM_000249.4(MLH1):c.1963A>T (p.Ile655Phe)	Uncertain Significance	-1	-4	Gene-specific
MLH1	NM_000249.4(MLH1):c.2074T>C (p.Ser692Pro)	Likely Benign	-1	-4	Gene-specific
MLH1	NM_000249.4(MLH1):c.1667G>A (p.Ser556Asn)	Likely Pathogenic	0	0	Gene-specific
MLH1	NM_000249.4(MLH1):c.923A>C (p.His308Pro)	Pathogenic	2	1	Gene-specific
MLH1	NM_000249.4(MLH1):c.649C>T (p.Arg217Cys)	Benign	0	-2	Gene-specific
MLH1	NM_000249.4(MLH1):c.350C>G (p.Thr117Arg)	Likely Pathogenic	2	2	Gene-specific
MLH1	NM_000249.4(MLH1):c.1646T>C (p.Leu549Pro)	Likely Pathogenic	2	2	Gene-specific
MLH1	NM_000249.4(MLH1):c.1270G>A (p.Ala424Thr)	Uncertain Significance	-1	-4	Gene-specific
MSH2	NM_000251.3(MSH2):c.2075G>T (p.Gly692Val)	Pathogenic	2	2	Gene-specific
MSH2	NM_000251.3(MSH2):c.913G>A (p.Ala305Thr)	Likely Benign	2	-4	Gene-specific
MSH2	NM_000251.3(MSH2):c.1012G>A (p.Gly338Arg)	Pathogenic	2	2	Gene-specific
MSH2	NM_000251.3(MSH2):c.211G>C (p.Gly71Arg)	Pathogenic	0	-3	Gene-specific
MSH2	NM_000251.3(MSH2):c.929T>G (p.Leu310Arg)	Pathogenic	2	2	Gene-specific
MSH2	NM_000251.3(MSH2):c.1276G>A (p.Gly426Arg)	Pathogenic	0	-1	Gene-specific
MSH2	NM_000251.3(MSH2):c.1748A>G (p.Asn583Ser)	Likely Benign	-1	-4	Gene-specific
MSH6	NM_000179.3(MSH6):c.884A>G (p.Lys295Arg)	Uncertain Significance	0	-4	Gene-specific
MSH6	NM_000179.3(MSH6):c.107C>T (p.Ala36Val)	Likely Benign	-1	-4	Gene-specific
MSH6	NM_000179.3(MSH6):c.1296T>G (p.Phe432Leu)	Likely Pathogenic	1	4	Gene-specific
MSH6	NM_000179.3(MSH6):c.1282A>G (p.Lys428Glu)	Likely Pathogenic	1	4	Gene-specific
MTM1	NM_000252.3(MTM1):c.575A>G (p.Tyr192Cys)	Likely Pathogenic	1	0	Gene-specific
MTM1	NM_000252.3(MTM1):c.1702A>G (p.Ile568Val)	Benign	0	-4	Gene-specific
MTM1	NM_000252.3(MTM1):c.205C>T (p.Arg69Cys)	Pathogenic	1	0	Gene-specific
MTM1	NM_000252.3(MTM1):c.1454C>T (p.Ala485Val)	Benign	0	-4	Gene-specific
MTM1	NM_000252.3(MTM1):c.614C>T (p.Pro205Leu)	Pathogenic	1	3	Gene-specific
MTM1	NM_000252.3(MTM1):c.688T>C (p.Trp230Arg)	Likely Pathogenic	1	4	Gene-specific
MTOR	NM_004958.3(MTOR):c.5930C>A (p.Thr1977Lys)	Pathogenic	0	1	Gene-specific
MTOR	NM_004958.4(MTOR):c.4448G>A (p.Cys1483Tyr)	Pathogenic	0	2	Gene-specific
MTOR	NM_004958.4(MTOR):c.6644C>A (p.Ser2215Tyr)	Pathogenic	0	0	Gene-specific
MTOR	NM_004958.4(MTOR):c.4379T>C (p.Leu1460Pro)	Pathogenic	0	2	Gene-specific
MTOR	NM_004958.3(MTOR):c.4447T>C (p.Cys1483Arg)	Pathogenic	0	2	Gene-specific
MTOR	NM_004958.3(MTOR):c.6644C>T (p.Ser2215Phe)	Pathogenic	0	0	Gene-specific
MTOR	NM_004958.4(MTOR):c.7280T>C (p.Leu2427Pro)	Pathogenic	0	2	Gene-specific
MTOR	NM_004958.4(MTOR):c.5978A>G (p.Lys1993Arg)	Uncertain Significance	0	-4	Gene-specific
MTOR	NM_004958.4(MTOR):c.1249A>G (p.Met417Val)	Uncertain Significance	0	-4	Gene-specific
MTOR	NM_004958.4(MTOR):c.5005G>T (p.Ala1669Ser)	Likely Pathogenic	0	-4	Gene-specific
MTOR	NM_004958.4(MTOR):c.4468T>C (p.Trp1490Arg)	Likely Pathogenic	0	2	Gene-specific
MTOR	NM_004958.4(MTOR):c.6752G>A (p.Arg2251Gln)	Uncertain Significance	0	0	Gene-specific
MYH7	NM_000257.4(MYH7):c.4828G>C (p.Glu1610Gln)	Uncertain Significance	1	0	Gene-specific
MYH7	NM_000257.3(MYH7):c.1157A>G (p.Tyr386Cys)	Likely Pathogenic	1	0	Gene-specific
MYH7	NM_000257.4(MYH7):c.5534G>A (p.Arg1845Gln)	Uncertain Significance	1	1	Gene-specific
MYH7	NM_000257.4(MYH7):c.511A>C (p.Asn171His)	Uncertain Significance	1	0	Gene-specific
MYH7	NM_000257.4(MYH7):c.1357C>A (p.Arg453Ser)	Pathogenic	1	1	Gene-specific
MYH7	NM_000257.4(MYH7):c.3133C>T (p.Arg1045Cys)	Uncertain Significance	1	-1	Gene-specific
MYH7	NM_000257.4(MYH7):c.5342G>A (p.Arg1781His)	Uncertain Significance	1	0	Gene-specific
MYH7	NM_000257.4(MYH7):c.5305C>A (p.Leu1769Met)	Uncertain Significance	1	0	Gene-specific
MYH7	NM_000257.4(MYH7):c.2710C>T (p.Arg904Cys)	Pathogenic	1	0	Gene-specific
MYH7	NM_000257.4(MYH7):c.2714G>C (p.Cys905Ser)	Uncertain Significance	1	0	Gene-specific
MYH7	NM_000257.4(MYH7):c.4499G>A (p.Arg1500Gln)	Uncertain Significance	1	0	Gene-specific
MYH7	NM_000257.3(MYH7):c.3382G>A (p.Ala1128Thr)	Likely Benign	0	-2	Gene-specific
MYH7	NM_000257.3(MYH7):c.5704G>C (p.Glu1902Gln)	Likely Benign	0	-1	Gene-specific
MYH7	NM_000257.4(MYH7):c.2213G>C (p.Ser738Thr)	Uncertain Significance	0	-1	Gene-specific
MYH7	NM_000257.4(MYH7):c.1148A>G (p.Lys383Arg)	Uncertain Significance	0	-1	Gene-specific
MYH7	NM_000257.3(MYH7):c.2722C>G (p.Leu908Val)	Pathogenic	1	0	Gene-specific
MYH7	NM_000257.3(MYH7):c.2609G>A (p.Arg870His)	Pathogenic	0	-1	Gene-specific
MYH7	NM_000257.3(MYH7):c.2221G>T (p.Gly741Trp)	Pathogenic	1	1	Gene-specific
MYH7	NM_000257.3(MYH7):c.2207T>C (p.Ile736Thr)	Pathogenic	0	-1	Gene-specific
MYH7	NM_000257.3(MYH7):c.2167C>T (p.Arg723Cys)	Pathogenic	1	0	Gene-specific
MYH7	NM_000257.3(MYH7):c.2155C>T (p.Arg719Trp)	Pathogenic	1	0	Gene-specific
MYH7	NM_000257.3(MYH7):c.1207C>T (p.Arg403Trp)	Pathogenic	1	1	Gene-specific
MYH7	NM_000257.4(MYH7):c.427C>T (p.Arg143Trp)	Pathogenic	1	1	Gene-specific
MYH7	NM_000257.4(MYH7):c.709C>T (p.Arg237Trp)	Likely Pathogenic	1	1	Gene-specific
MYH7	NM_000257.4(MYH7):c.611G>A (p.Arg204His)	Likely Pathogenic	0	-2	Gene-specific
MYH7	NM_000257.4(MYH7):c.3578G>A (p.Arg1193His)	Likely Pathogenic	1	0	Gene-specific
MYH7	NM_000257.4(MYH7):c.4066G>A (p.Glu1356Lys)	Pathogenic	1	0	Gene-specific
MYH7	NM_000257.4(MYH7):c.3158G>A (p.Arg1053Gln)	Pathogenic	1	0	Gene-specific
MYH7	NM_000257.4(MYH7):c.3883G>A (p.Glu1295Lys)	Uncertain Significance	1	0	Gene-specific
MYH7	NM_000257.4(MYH7):c.550A>C (p.Lys184Gln)	Uncertain Significance	1	1	Gene-specific
MYH7	NM_000257.4(MYH7):c.610C>T (p.Arg204Cys)	Uncertain Significance	0	0	Gene-specific
MYH7	NM_000257.4(MYH7):c.964T>A (p.Ser322Thr)	Uncertain Significance	0	-1	Gene-specific
MYH7	NM_000257.4(MYH7):c.5530G>A (p.Glu1844Lys)	Uncertain Significance	1	0	Gene-specific
MYH7	NM_000257.4(MYH7):c.3134G>T (p.Arg1045Leu)	Likely Pathogenic	1	0	Gene-specific
MYH7	NM_000257.4(MYH7):c.2678C>A (p.Ala893Glu)	Uncertain Significance	0	0	Gene-specific
MYH7	NM_000257.4(MYH7):c.2129C>A (p.Pro710His)	Likely Pathogenic	1	1	Gene-specific
MYH7	NM_000257.4(MYH7):c.2602G>C (p.Ala868Pro)	Likely Pathogenic	1	0	Gene-specific
MYH7	NM_000257.4(MYH7):c.2593A>G (p.Lys865Glu)	Likely Pathogenic	0	0	Gene-specific
MYH7	NM_000257.4(MYH7):c.4283T>C (p.Leu1428Ser)	Uncertain Significance	1	1	Gene-specific
MYH7	NM_000257.4(MYH7):c.1013T>C (p.Val338Ala)	Uncertain Significance	0	0	Gene-specific
MYH7	NM_000257.4(MYH7):c.1925C>T (p.Ser642Leu)	Uncertain Significance	0	0	Gene-specific
MYH7	NM_000257.3(MYH7):c.2717A>G (p.Asp906Gly)	Pathogenic	0	0	Gene-specific
MYH7	NM_000257.3(MYH7):c.2681A>G (p.Glu894Gly)	Pathogenic	1	-1	Gene-specific
MYH7	NM_000257.3(MYH7):c.2513C>T (p.Pro838Leu)	Pathogenic	1	1	Gene-specific
MYH7	NM_000257.3(MYH7):c.2221G>C (p.Gly741Arg)	Pathogenic	1	1	Gene-specific
MYH7	NM_000257.3(MYH7):c.3770A>G (p.Asn1257Ser)	Benign	0	-2	Gene-specific
MYH7	NM_000257.4(MYH7):c.2707G>A (p.Glu903Lys)	Uncertain Significance	1	0	Gene-specific
MYH7	NM_000257.4(MYH7):c.758G>T (p.Gly253Val)	Uncertain Significance	1	1	Gene-specific
MYH7	NM_000257.4(MYH7):c.1633G>A (p.Asp545Asn)	Uncertain Significance	1	0	Gene-specific
MYH7	NM_000257.4(MYH7):c.1106G>A (p.Arg369Gln)	Likely Pathogenic	0	1	Gene-specific
MYH7	NM_000257.4(MYH7):c.3169G>A (p.Gly1057Ser)	Likely Pathogenic	1	0	Gene-specific
MYH7	NM_000257.4(MYH7):c.5395G>A (p.Glu1799Lys)	Uncertain Significance	1	1	Gene-specific
MYH7	NM_000257.4(MYH7):c.1318G>A (p.Val440Met)	Likely Pathogenic	1	1	Gene-specific
MYH7	NM_000257.4(MYH7):c.1700G>A (p.Arg567His)	Uncertain Significance	0	0	Gene-specific
MYH7	NM_000257.4(MYH7):c.2711G>A (p.Arg904His)	Pathogenic	1	0	Gene-specific
MYH7	NM_000257.4(MYH7):c.1012G>A (p.Val338Met)	Likely Pathogenic	0	0	Gene-specific
MYH7	NM_000257.3(MYH7):c.5588G>A (p.Arg1863Gln)	Uncertain Significance	1	0	Gene-specific
MYH7	NM_000257.3(MYH7):c.5302G>A (p.Glu1768Lys)	Uncertain Significance	1	1	Gene-specific
MYH7	NM_000257.4(MYH7):c.2804A>T (p.Glu935Val)	Uncertain Significance	1	-1	Gene-specific
MYH7	NM_000257.4(MYH7):c.1046T>C (p.Met349Thr)	Uncertain Significance	0	-1	Gene-specific
MYH7	NM_000257.4(MYH7):c.5134C>T (p.Arg1712Trp)	Likely Pathogenic	1	0	Gene-specific
MYH7	NM_000257.4(MYH7):c.728G>A (p.Arg243His)	Uncertain Significance	1	1	Gene-specific
MYH7	NM_000257.3(MYH7):c.4472C>G (p.Ser1491Cys)	Benign	0	-2	Gene-specific
MYH7	NM_000257.3(MYH7):c.77C>T (p.Ala26Val)	Benign	0	-1	Gene-specific
MYH7	NM_000257.3(MYH7):c.5326A>G (p.Ser1776Gly)	Uncertain Significance	1	0	Gene-specific
MYH7	NM_000257.3(MYH7):c.2156G>A (p.Arg719Gln)	Pathogenic	1	0	Gene-specific
MYH7	NM_000257.3(MYH7):c.2146G>A (p.Gly716Arg)	Pathogenic	1	1	Gene-specific
MYH7	NM_000257.3(MYH7):c.1594T>C (p.Ser532Pro)	Pathogenic	1	1	Gene-specific
MYH7	NM_000257.3(MYH7):c.788T>C (p.Ile263Thr)	Pathogenic	1	1	Gene-specific
MYH7	NM_000257.3(MYH7):c.428G>A (p.Arg143Gln)	Likely Pathogenic	0	0	Gene-specific
MYH7	NM_000257.4(MYH7):c.1477A>G (p.Met493Val)	Uncertain Significance	0	1	Gene-specific
MYH7	NM_000257.4(MYH7):c.2525G>A (p.Ser842Asn)	Uncertain Significance	0	0	Gene-specific
MYH7	NM_000257.4(MYH7):c.1969A>C (p.Lys657Gln)	Uncertain Significance	1	0	Gene-specific
MYH7	NM_000257.4(MYH7):c.2080C>T (p.Arg694Cys)	Likely Pathogenic	1	0	Gene-specific
MYH7	NM_000257.4(MYH7):c.1273G>A (p.Gly425Arg)	Uncertain Significance	1	0	Gene-specific
MYH7	NM_000257.4(MYH7):c.677C>T (p.Ala226Val)	Uncertain Significance	0	0	Gene-specific
MYH7	NM_000257.4(MYH7):c.4470G>C (p.Glu1490Asp)	Uncertain Significance	0	0	Gene-specific
MYH7	NM_000257.4(MYH7):c.4130C>T (p.Thr1377Met)	Pathogenic	1	0	Gene-specific
MYH7	NM_000257.3(MYH7):c.2539A>G (p.Lys847Glu)	Pathogenic	0	0	Gene-specific
MYH7	NM_000257.4(MYH7):c.3020T>C (p.Leu1007Pro)	Uncertain Significance	1	1	Gene-specific
MYH7	NM_000257.4(MYH7):c.29G>C (p.Gly10Ala)	Uncertain Significance	0	0	Gene-specific
MYH7	NM_000257.4(MYH7):c.323G>A (p.Arg108His)	Uncertain Significance	1	1	Gene-specific
MYH7	NM_000257.4(MYH7):c.341T>C (p.Ile114Thr)	Uncertain Significance	1	1	Gene-specific
MYH7	NM_000257.4(MYH7):c.1370T>C (p.Ile457Thr)	Likely Pathogenic	1	1	Gene-specific
MYH7	NM_000257.4(MYH7):c.1141G>A (p.Ala381Thr)	Uncertain Significance	0	-1	Gene-specific
MYH7	NM_000257.4(MYH7):c.707T>C (p.Val236Ala)	Uncertain Significance	0	0	Gene-specific
MYH7	NM_000257.3(MYH7):c.3286G>T (p.Asp1096Tyr)	Likely Benign	1	0	Gene-specific
MYH7	NM_000257.4(MYH7):c.5647G>A (p.Glu1883Lys)	Uncertain Significance	1	0	Gene-specific
MYH7	NM_000257.3(MYH7):c.2360G>A (p.Arg787His)	Likely Benign	0	-2	Gene-specific
MYH7	NM_000257.3(MYH7):c.2167C>G (p.Arg723Gly)	Pathogenic	1	0	Gene-specific
MYH7	NM_000257.3(MYH7):c.2945T>C (p.Met982Thr)	Benign	0	0	Gene-specific
MYH7	NM_000257.3(MYH7):c.1208G>A (p.Arg403Gln)	Pathogenic	1	0	Gene-specific
MYH7	NM_000257.3(MYH7):c.1358G>A (p.Arg453His)	Pathogenic	1	1	Gene-specific
MYH7	NM_000257.4(MYH7):c.872C>T (p.Ser291Phe)	Uncertain Significance	1	1	Gene-specific
MYH7	NM_000257.4(MYH7):c.5399C>T (p.Ala1800Val)	Uncertain Significance	0	0	Gene-specific
MYH7	NM_000257.4(MYH7):c.2608C>T (p.Arg870Cys)	Likely Pathogenic	1	-1	Gene-specific
MYH7	NM_000257.4(MYH7):c.4258C>T (p.Arg1420Trp)	Likely Pathogenic	1	1	Gene-specific
MYH7	NM_000257.4(MYH7):c.5135G>A (p.Arg1712Gln)	Pathogenic	0	-1	Gene-specific
MYH7	NM_000257.4(MYH7):c.4276G>A (p.Glu1426Lys)	Uncertain Significance	1	1	Gene-specific
MYH7	NM_000257.3(MYH7):c.2678C>T (p.Ala893Val)	Uncertain Significance	0	-1	Gene-specific
MYH7	NM_000257.4(MYH7):c.343T>C (p.Tyr115His)	Uncertain Significance	1	1	Gene-specific
MYH7	NM_000257.4(MYH7):c.2606G>A (p.Arg869His)	Likely Pathogenic	0	-2	Gene-specific
MYH7	NM_000257.4(MYH7):c.1193G>A (p.Gly398Glu)	Uncertain Significance	0	1	Gene-specific
MYH7	NM_000257.4(MYH7):c.5740G>A (p.Glu1914Lys)	Likely Pathogenic	1	0	Gene-specific
MYH7	NM_000257.3(MYH7):c.4909G>A (p.Ala1637Thr)	Likely Benign	-1	-2	Gene-specific
MYH7	NM_000257.4(MYH7):c.715G>A (p.Asp239Asn)	Likely Pathogenic	0	0	Gene-specific
MYH7	NM_000257.4(MYH7):c.2845G>A (p.Glu949Lys)	Likely Pathogenic	1	0	Gene-specific
MYH7	NM_000257.4(MYH7):c.3337G>A (p.Ala1113Thr)	Uncertain Significance	0	0	Gene-specific
MYH7	NM_000257.4(MYH7):c.5458C>T (p.Arg1820Trp)	Uncertain Significance	1	-1	Gene-specific
MYH7	NM_000257.3(MYH7):c.4377G>T (p.Lys1459Asn)	Likely Benign	1	1	Gene-specific
MYH7	NM_000257.3(MYH7):c.5401G>A (p.Glu1801Lys)	Likely Pathogenic	1	1	Gene-specific
MYH7	NM_000257.3(MYH7):c.1988G>A (p.Arg663His)	Pathogenic	0	-1	Gene-specific
MYH7	NM_000257.3(MYH7):c.1750G>C (p.Gly584Arg)	Pathogenic	1	1	Gene-specific
MYO15A	NM_016239.4(MYO15A):c.6337A>T (p.Ile2113Phe)	Likely Pathogenic	1	1	Gene-specific
MYO15A	NM_016239.4(MYO15A):c.1111C>A (p.Pro371Thr)	Likely Benign	-1	-1	Gene-specific
MYO15A	NM_016239.4(MYO15A):c.5929T>C (p.Cys1977Arg)	Benign	0	-2	Gene-specific
MYO15A	NM_016239.4(MYO15A):c.9998G>A (p.Arg3333Gln)	Likely Benign	0	-2	Gene-specific
MYO15A	NM_016239.4(MYO15A):c.2238G>T (p.Arg746Ser)	Benign	-1	0	Gene-specific
MYO15A	NM_016239.4(MYO15A):c.1582G>A (p.Gly528Ser)	Likely Benign	-1	-2	Gene-specific
MYO15A	NM_016239.4(MYO15A):c.4497G>T (p.Glu1499Asp)	Likely Benign	0	0	Gene-specific
MYO7A	NM_000260.4(MYO7A):c.1183C>T (p.Arg395Cys)	Likely Pathogenic	1	0	Gene-specific
MYO7A	NM_000260.4(MYO7A):c.19G>A (p.Gly7Arg)	Uncertain Significance	1	1	Gene-specific
MYO7A	NM_000260.4(MYO7A):c.977T>A (p.Leu326Gln)	Likely Pathogenic	1	4	Gene-specific
MYO7A	NM_000260.4(MYO7A):c.5804T>C (p.Leu1935Pro)	Likely Pathogenic	1	3	Gene-specific
MYO7A	NM_000260.4(MYO7A):c.1849T>C (p.Ser617Pro)	Likely Pathogenic	1	4	Gene-specific
MYO7A	NM_000260.4(MYO7A):c.1817G>A (p.Arg606His)	Uncertain Significance	1	0	Gene-specific
MYO7A	NM_000260.4(MYO7A):c.3491G>A (p.Arg1164Gln)	Uncertain Significance	1	2	Gene-specific
MYO7A	NM_000260.4(MYO7A):c.4115T>G (p.Val1372Gly)	Likely Pathogenic	1	1	Gene-specific
MYO7A	NM_000260.4(MYO7A):c.3546C>A (p.Asn1182Lys)	Likely Pathogenic	1	4	Gene-specific
MYO7A	NM_000260.4(MYO7A):c.3827C>T (p.Ser1276Leu)	Uncertain Significance	1	3	Gene-specific
MYO7A	NM_000260.4(MYO7A):c.2904G>T (p.Glu968Asp)	Likely Pathogenic	0	0	Gene-specific
MYO7A	NM_000260.4(MYO7A):c.3862G>C (p.Ala1288Pro)	Likely Pathogenic	1	4	Gene-specific
MYO7A	NM_000260.3(MYO7A):c.1007G>A (p.Arg336His)	Likely Benign	0	-4	Gene-specific
MYO7A	NM_000260.4(MYO7A):c.3527G>A (p.Ser1176Asn)	Uncertain Significance	0	0	Gene-specific
MYO7A	NM_000260.4(MYO7A):c.5618G>A (p.Arg1873Gln)	Pathogenic	1	3	Gene-specific
MYO7A	NM_000260.3(MYO7A):c.905G>A (p.Arg302His)	Likely Benign	0	-4	Gene-specific
MYO7A	NM_000260.4(MYO7A):c.1208A>G (p.Tyr403Cys)	Likely Pathogenic	1	1	Gene-specific
MYO7A	NM_000260.4(MYO7A):c.2558G>A (p.Arg853His)	Likely Pathogenic	1	-1	Gene-specific
MYO7A	NM_000260.4(MYO7A):c.397C>A (p.His133Asn)	Likely Pathogenic	1	0	Gene-specific
MYO7A	NM_000260.4(MYO7A):c.983T>C (p.Leu328Pro)	Uncertain Significance	1	3	Gene-specific
MYO7A	NM_000260.3(MYO7A):c.3503G>A (p.Arg1168Gln)	Pathogenic	1	2	Gene-specific
MYO7A	NM_000260.4(MYO7A):c.1997G>A (p.Arg666Gln)	Uncertain Significance	1	0	Gene-specific
OTOF	NM_194248.3(OTOF):c.5374C>T (p.Arg1792Cys)	Likely Pathogenic	1	1	Gene-specific
OTOF	NM_194248.3(OTOF):c.4091G>T (p.Gly1364Val)	Likely Benign	0	-4	Gene-specific
OTOF	NM_194248.3(OTOF):c.5405C>T (p.Ala1802Val)	Uncertain Significance	1	0	Gene-specific
OTOF	NM_194248.3(OTOF):c.4463A>T (p.Asp1488Val)	Uncertain Significance	1	-4	Gene-specific
OTOF	NM_194248.3(OTOF):c.1723G>A (p.Val575Met)	Benign	0	-4	Gene-specific
OTOF	NM_194248.3(OTOF):c.4582G>A (p.Asp1528Asn)	Likely Benign	0	1	Gene-specific
SCN1A	NM_001165963.4(SCN1A):c.83G>A (p.Arg28His)	Likely Benign	2	-4	Gene-specific
SCN1A	NM_001165963.4(SCN1A):c.1678C>T (p.Arg560Cys)	Likely Benign	2	-3	Gene-specific
SCN1A	NM_001165963.4(SCN1A):c.4393A>G (p.Ile1465Val)	Benign	0	-4	Gene-specific
SCN1A	NM_001165963.4(SCN1A):c.2941C>A (p.Leu981Ile)	Uncertain Significance	2	2	Gene-specific
SCN1A	NM_001165963.4(SCN1A):c.2303C>T (p.Pro768Leu)	Likely Pathogenic	2	4	Gene-specific
SCN1A	NM_001165963.4(SCN1A):c.3629C>T (p.Thr1210Met)	Likely Pathogenic	2	-2	Gene-specific
SCN1A	NM_001165963.4(SCN1A):c.1709G>A (p.Ser570Asn)	Likely Pathogenic	2	0	Gene-specific
SCN1A	NM_001165963.4(SCN1A):c.4916G>C (p.Arg1639Pro)	Pathogenic	2	4	Gene-specific
SCN2A	NM_001040142.2(SCN2A):c.1571G>A (p.Arg524Gln)	Benign	-1	-4	Gene-specific
SCN2A	NM_001040142.2(SCN2A):c.3007C>A (p.Leu1003Ile)	Uncertain Significance	0	0	Gene-specific
SCN2A	NM_001040142.2(SCN2A):c.5636T>C (p.Met1879Thr)	Likely Pathogenic	2	4	Gene-specific
SCN2A	NM_001040142.2(SCN2A):c.56G>A (p.Arg19Lys)	Benign	0	-4	Gene-specific
SCN2A	NM_001040142.2(SCN2A):c.2723A>G (p.Lys908Arg)	Benign	0	-4	Gene-specific
SCN2A	NM_001040142.2(SCN2A):c.3043G>A (p.Asp1015Asn)	Likely Benign	-1	-4	Gene-specific
SCN2A	NM_001040142.2(SCN2A):c.5317G>A (p.Ala1773Thr)	Pathogenic	0	3	Gene-specific
SCN2A	NM_001040142.2(SCN2A):c.1108T>C (p.Phe370Leu)	Uncertain Significance	2	4	Gene-specific
SCN2A	NM_001040142.2(SCN2A):c.1094C>T (p.Thr365Met)	Likely Pathogenic	2	3	Gene-specific
SCN2A	NM_001040142.2(SCN2A):c.1399G>A (p.Ala467Thr)	Benign	-1	-4	Gene-specific
SCN2A	NM_001040142.2(SCN2A):c.2657T>C (p.Leu886Ser)	Likely Pathogenic	2	4	Gene-specific
SCN8A	NM_001330260.2(SCN8A):c.5615G>A (p.Arg1872Gln)	Pathogenic	2	0	Gene-specific
SCN8A	NM_001330260.2(SCN8A):c.3953A>G (p.Asn1318Ser)	Likely Pathogenic	2	-1	Gene-specific
SCN8A	NM_001330260.2(SCN8A):c.4687A>G (p.Ile1563Val)	Benign	0	-4	Gene-specific
SCN8A	NM_001330260.2(SCN8A):c.4590G>A (p.Met1530Ile)	Benign	0	-4	Gene-specific
SLC6A8	NM_005629.4(SLC6A8):c.1396G>A (p.Gly466Arg)	Likely Pathogenic	1	4	Gene-specific
SLC6A8	NM_005629.4(SLC6A8):c.1661C>T (p.Pro554Leu)	Pathogenic	1	4	Gene-specific
SLC6A8	NM_005629.4(SLC6A8):c.92C>T (p.Pro31Leu)	Uncertain Significance	-1	-4	Gene-specific
SLC6A8	NM_005629.4(SLC6A8):c.874T>C (p.Tyr292His)	Uncertain Significance	1	4	Gene-specific
SLC6A8	NM_005629.4(SLC6A8):c.395G>T (p.Gly132Val)	Likely Pathogenic	1	4	Gene-specific
SLC6A8	NM_005629.4(SLC6A8):c.370T>C (p.Trp124Arg)	Uncertain Significance	1	4	Gene-specific
SLC6A8	NM_005629.4(SLC6A8):c.1430C>T (p.Ser477Leu)	Uncertain Significance	1	4	Gene-specific
SLC6A8	NM_005629.4(SLC6A8):c.1162G>A (p.Ala388Thr)	Benign	0	0	Gene-specific
SLC6A8	NM_005629.4(SLC6A8):c.1631C>T (p.Pro544Leu)	Likely Pathogenic	1	0	Gene-specific
SLC6A8	NM_005629.4(SLC6A8):c.76G>A (p.Gly26Arg)	Uncertain Significance	-1	-4	Gene-specific
SLC6A8	NM_005629.4(SLC6A8):c.340C>A (p.Gln114Lys)	Uncertain Significance	1	4	Gene-specific
SLC6A8	NM_005629.4(SLC6A8):c.1285C>G (p.Leu429Val)	Likely Benign	-1	-4	Gene-specific
SLC6A8	NM_005629.4(SLC6A8):c.1141G>C (p.Gly381Arg)	Pathogenic	1	4	Gene-specific
SLC6A8	NM_005629.4(SLC6A8):c.11A>G (p.Lys4Arg)	Uncertain Significance	-1	-4	Gene-specific
SLC6A8	NM_005629.4(SLC6A8):c.912G>C (p.Gln304His)	Uncertain Significance	1	0	Gene-specific
SLC6A8	NM_005629.4(SLC6A8):c.259G>A (p.Gly87Arg)	Uncertain Significance	1	4	Gene-specific
SLC6A8	NM_005629.4(SLC6A8):c.1262G>A (p.Gly421Asp)	Uncertain Significance	0	4	Gene-specific
SLC6A8	NM_005629.4(SLC6A8):c.54G>C (p.Lys18Asn)	Uncertain Significance	-1	-2	Gene-specific
SLC6A8	NM_005629.4(SLC6A8):c.342G>C (p.Gln114His)	Likely Pathogenic	1	4	Gene-specific
SLC6A8	NM_005629.4(SLC6A8):c.1145C>T (p.Pro382Leu)	Likely Pathogenic	1	4	Gene-specific
SLC6A8	NM_005629.4(SLC6A8):c.617G>A (p.Arg206His)	Uncertain Significance	-1	-4	Gene-specific
SLC6A8	NM_005629.4(SLC6A8):c.1473C>G (p.Cys491Trp)	Likely Pathogenic	1	4	Gene-specific
SLC6A8	NM_005629.4(SLC6A8):c.56A>C (p.Lys19Thr)	Uncertain Significance	-1	-4	Gene-specific
SLC6A8	NM_005629.4(SLC6A8):c.145G>C (p.Val49Leu)	Uncertain Significance	-1	-4	Gene-specific
SLC6A8	NM_005629.4(SLC6A8):c.544G>A (p.Val182Met)	Benign	-1	-4	Gene-specific
SLC6A8	NM_005629.4(SLC6A8):c.1861C>T (p.Pro621Ser)	Likely Benign	-1	-3	Gene-specific
SLC6A8	NM_005629.4(SLC6A8):c.70G>C (p.Ala24Pro)	Uncertain Significance	-1	-4	Gene-specific
SLC6A8	NM_005629.4(SLC6A8):c.1879A>C (p.Lys627Gln)	Likely Benign	0	-2	Gene-specific
SLC6A8	NM_005629.4(SLC6A8):c.1778A>G (p.His593Arg)	Benign	-1	-4	Gene-specific
SLC6A8	NM_005629.4(SLC6A8):c.1810T>A (p.Leu604Met)	Likely Benign	-1	-4	Gene-specific
SLC6A8	NM_005629.4(SLC6A8):c.1570T>A (p.Ser524Thr)	Likely Benign	-1	-4	Gene-specific
SLC6A8	NM_005629.4(SLC6A8):c.619C>T (p.Arg207Trp)	Likely Pathogenic	0	-2	Gene-specific
SLC6A8	NM_005629.4(SLC6A8):c.1646A>C (p.Asn549Thr)	Likely Benign	-1	-4	Gene-specific
SLC6A8	NM_005629.4(SLC6A8):c.26G>T (p.Gly9Val)	Likely Benign	-1	-4	Gene-specific
SLC6A8	NM_005629.4(SLC6A8):c.1714G>A (p.Val572Met)	Likely Benign	0	-2	Gene-specific
SLC6A8	NM_005629.4(SLC6A8):c.1025T>C (p.Ile342Thr)	Likely Benign	0	-1	Gene-specific
SLC6A8	NM_005629.4(SLC6A8):c.1169C>T (p.Pro390Leu)	Pathogenic	1	4	Gene-specific
SLC6A8	NM_005629.4(SLC6A8):c.48C>A (p.Asp16Glu)	Uncertain Significance	-1	-4	Gene-specific
SLC6A8	NM_005629.4(SLC6A8):c.116G>A (p.Gly39Asp)	Uncertain Significance	-1	-4	Gene-specific
SLC6A8	NM_005629.4(SLC6A8):c.557G>A (p.Arg186His)	Likely Benign	-1	-4	Gene-specific
SLC6A8	NM_005629.4(SLC6A8):c.1601T>C (p.Ile534Thr)	Likely Benign	0	1	Gene-specific
SLC6A8	NM_005629.4(SLC6A8):c.1525T>C (p.Cys509Arg)	Likely Benign	0	-4	Gene-specific
SLC6A8	NM_005629.4(SLC6A8):c.1703C>A (p.Ser568Tyr)	Uncertain Significance	1	4	Gene-specific
SLC6A8	NM_005629.4(SLC6A8):c.89C>T (p.Ala30Val)	Uncertain Significance	-1	-4	Gene-specific
SLC6A8	NM_005629.4(SLC6A8):c.1048G>A (p.Gly350Arg)	Uncertain Significance	1	4	Gene-specific
SLC6A8	NM_005629.4(SLC6A8):c.1319G>A (p.Arg440His)	Likely Benign	0	-4	Gene-specific
SLC6A8	NM_005629.4(SLC6A8):c.1483G>A (p.Ala495Thr)	Likely Benign	0	0	Gene-specific
SOS1	NM_005633.3(SOS1):c.1655G>C (p.Arg552Thr)	Pathogenic	1	2	Gene-specific
SOS1	NM_005633.3(SOS1):c.1276C>A (p.Gln426Lys)	Likely Pathogenic	1	2	Gene-specific
SOS1	NM_005633.3(SOS1):c.1490G>A (p.Arg497Gln)	Likely Benign	0	2	Gene-specific
SOS1	NM_005633.3(SOS1):c.3600C>G (p.Asp1200Glu)	Likely Benign	-1	-2	Gene-specific
SOS1	NM_005633.3(SOS1):c.1018C>T (p.Pro340Ser)	Benign	0	2	Gene-specific
SOS1	NM_005633.3(SOS1):c.1655G>T (p.Arg552Met)	Likely Pathogenic	1	2	Gene-specific
SOS1	NM_005633.3(SOS1):c.1656G>C (p.Arg552Ser)	Pathogenic	1	2	Gene-specific
SOS1	NM_005633.3(SOS1):c.1655G>A (p.Arg552Lys)	Pathogenic	1	1	Gene-specific
SOS1	NM_005633.3(SOS1):c.2371C>A (p.Leu791Ile)	Benign	0	-1	Gene-specific
SOS1	NM_005633.3(SOS1):c.806T>C (p.Met269Thr)	Pathogenic	1	2	Gene-specific
SOS1	NM_005633.3(SOS1):c.1385T>A (p.Phe462Tyr)	Uncertain Significance	1	0	Gene-specific
SOS1	NM_005633.3(SOS1):c.1666G>A (p.Val556Ile)	Uncertain Significance	0	-2	Gene-specific
SOS1	NM_005633.3(SOS1):c.553A>G (p.Ile185Val)	Benign	0	-2	Gene-specific
SOS1	NM_005633.3(SOS1):c.2010G>C (p.Leu670Phe)	Benign	0	-1	Gene-specific
SOS1	NM_005633.3(SOS1):c.350T>G (p.Val117Gly)	Likely Benign	1	1	Gene-specific
SOS1	NM_005633.3(SOS1):c.322G>A (p.Glu108Lys)	Pathogenic	0	2	Gene-specific
SOS1	NM_005633.3(SOS1):c.3709C>A (p.Pro1237Thr)	Likely Benign	0	-1	Gene-specific
SOS1	NM_005633.3(SOS1):c.3721A>G (p.Lys1241Glu)	Uncertain Significance	0	-1	Gene-specific
SOS1	NM_005633.3(SOS1):c.1645A>G (p.Thr549Ala)	Uncertain Significance	0	-1	Gene-specific
SOS1	NM_005633.3(SOS1):c.899G>A (p.Arg300Gln)	Likely Benign	-1	-2	Gene-specific
SOS1	NM_005633.3(SOS1):c.512T>C (p.Val171Ala)	Likely Pathogenic	0	1	Gene-specific
SOS1	NM_005633.3(SOS1):c.1654A>T (p.Arg552Trp)	Likely Pathogenic	1	2	Gene-specific
SOS1	NM_005633.3(SOS1):c.2122G>A (p.Ala708Thr)	Benign	0	-2	Gene-specific
SOS1	NM_005633.3(SOS1):c.749T>C (p.Val250Ala)	Benign	0	-2	Gene-specific
SOS1	NM_005633.3(SOS1):c.1642A>C (p.Ser548Arg)	Pathogenic	1	2	Gene-specific
SOS1	NM_005633.3(SOS1):c.2536G>A (p.Glu846Lys)	Pathogenic	1	2	Gene-specific
SOS1	NM_005633.3(SOS1):c.1705C>G (p.Leu569Val)	Likely Benign	0	-1	Gene-specific
SOS1	NM_005633.3(SOS1):c.1964C>T (p.Pro655Leu)	Benign	0	-1	Gene-specific
SOS1	NM_005633.3(SOS1):c.1656G>T (p.Arg552Ser)	Pathogenic	1	2	Gene-specific
SOS1	NM_005633.3(SOS1):c.1772A>G (p.Asn591Ser)	Benign	0	-1	Gene-specific
SOS1	NM_005633.3(SOS1):c.3032A>G (p.Asn1011Ser)	Benign	0	-2	Gene-specific
SOS1	NM_005633.3(SOS1):c.508A>G (p.Lys170Glu)	Pathogenic	1	1	Gene-specific
SOS1	NM_005633.3(SOS1):c.3658G>A (p.Val1220Met)	Likely Benign	0	-1	Gene-specific
SOS1	NM_005633.3(SOS1):c.3322G>A (p.Asp1108Asn)	Likely Benign	0	-2	Gene-specific
SOS1	NM_005633.3(SOS1):c.1646C>A (p.Thr549Lys)	Uncertain Significance	0	0	Gene-specific
SOS1	NM_005633.3(SOS1):c.512T>G (p.Val171Gly)	Pathogenic	1	1	Gene-specific
SOS1	NM_005633.3(SOS1):c.3703C>T (p.Pro1235Ser)	Uncertain Significance	0	-1	Gene-specific
SOS1	NM_005633.3(SOS1):c.2156G>C (p.Gly719Ala)	Likely Benign	0	-1	Gene-specific
SOS1	NM_005633.3(SOS1):c.698A>G (p.Asn233Ser)	Likely Benign	0	-2	Gene-specific
SOS1	NM_005633.3(SOS1):c.109A>G (p.Thr37Ala)	Likely Benign	-1	-2	Gene-specific
SOS1	NM_005633.3(SOS1):c.73C>T (p.Pro25Ser)	Benign	0	-1	Gene-specific
SOS1	NM_005633.3(SOS1):c.1654A>G (p.Arg552Gly)	Pathogenic	1	2	Gene-specific
SOS1	NM_005633.3(SOS1):c.280A>G (p.Ile94Val)	Likely Benign	0	-1	Gene-specific
TP53	NM_000546.5(TP53):c.322G>A (p.Gly108Ser)	Likely Benign	-1	-4	Gene-specific
TP53	NM_000546.5(TP53):c.851C>T (p.Thr284Ile)	Likely Benign	0	0	Gene-specific
TP53	NM_000546.6(TP53):c.760A>G (p.Ile254Val)	Likely Benign	1	-4	Gene-specific
TP53	NM_000546.6(TP53):c.188C>G (p.Ala63Gly)	Likely Benign	-1	-4	Gene-specific
TP53	NM_000546.5(TP53):c.1066G>C (p.Gly356Arg)	Likely Benign	-1	-4	Gene-specific
TP53	NM_000546.6(TP53):c.537T>A (p.His179Gln)	Pathogenic	0	4	Gene-specific
TP53	NM_000546.6(TP53):c.659A>G (p.Tyr220Cys)	Pathogenic	2	1	Gene-specific
TP53	NM_000546.5(TP53):c.455C>T (p.Pro152Leu)	Pathogenic	2	-3	Gene-specific
TP53	NM_000546.5(TP53):c.743G>T (p.Arg248Leu)	Pathogenic	2	4	Gene-specific
TP53	NM_000546.5(TP53):c.403T>G (p.Cys135Gly)	Pathogenic	2	4	Gene-specific
TP53	NM_000546.5(TP53):c.145G>A (p.Asp49Asn)	Benign	-1	-4	Gene-specific
TP53	NM_000546.5(TP53):c.28G>A (p.Val10Ile)	Benign	-1	-4	Gene-specific
TP53	NM_000546.5(TP53):c.1000G>C (p.Gly334Arg)	Uncertain Significance	0	4	Gene-specific
TP53	NM_000546.5(TP53):c.847C>T (p.Arg283Cys)	Likely Benign	1	0	Gene-specific
TP53	NM_000546.5(TP53):c.461G>A (p.Gly154Asp)	Uncertain Significance	2	-4	Gene-specific
TP53	NM_000546.5(TP53):c.221C>T (p.Ala74Val)	Likely Benign	-1	-4	Gene-specific
TP53	NM_000546.5(TP53):c.364G>A (p.Val122Met)	Likely Benign	-1	1	Gene-specific
TP53	NM_001126112.2(TP53):c.1150A>G (p.Met384Val)	Likely Benign	-1	-4	Gene-specific
TP53	NM_000546.6(TP53):c.1135C>A (p.Arg379Ser)	Likely Benign	-1	-4	Gene-specific
TP53	NM_000546.6(TP53):c.1102C>T (p.His368Tyr)	Uncertain Significance	-1	-4	Gene-specific
TP53	NM_000546.6(TP53):c.149T>C (p.Ile50Thr)	Likely Benign	-1	-4	Gene-specific
TP53	NM_000546.6(TP53):c.1015G>C (p.Glu339Gln)	Likely Benign	-1	-4	Gene-specific
TP53	NM_000546.5(TP53):c.1060C>A (p.Gln354Lys)	Benign	-1	-4	Gene-specific
TP53	NM_000546.5(TP53):c.1025G>A (p.Arg342Gln)	Likely Benign	-1	-4	Gene-specific
TP53	NM_000546.5(TP53):c.704A>G (p.Asn235Ser)	Benign	-1	-4	Gene-specific
TP53	NM_000546.5(TP53):c.818G>A (p.Arg273His)	Pathogenic	1	4	Gene-specific
TP53	NM_001126112.2(TP53):c.431A>T (p.Gln144Leu)	Uncertain Significance	0	-3	Gene-specific
TP53	NM_000546.5(TP53):c.214C>G (p.Pro72Ala)	Likely Benign	-1	-4	Gene-specific
TP53	NM_000546.5(TP53):c.572C>G (p.Pro191Arg)	Likely Benign	-1	0	Gene-specific
TP53	NM_000546.5(TP53):c.144C>A (p.Asp48Glu)	Likely Benign	-1	-4	Gene-specific
TP53	NM_001126112.2(TP53):c.215C>A (p.Pro72His)	Benign	-1	-4	Gene-specific
TP53	NM_001126112.2(TP53):c.1136G>T (p.Arg379Leu)	Likely Benign	-1	-4	Gene-specific
TP53	NM_000546.5(TP53):c.480G>A (p.Met160Ile)	Likely Benign	0	4	Gene-specific
TP53	NM_000546.5(TP53):c.949C>A (p.Gln317Lys)	Benign	-1	-4	Gene-specific
TP53	NM_000546.5(TP53):c.1136G>A (p.Arg379His)	Likely Benign	-1	-4	Gene-specific
TP53	NM_000546.6(TP53):c.556G>A (p.Asp186Asn)	Likely Benign	-1	-3	Gene-specific
TP53	NM_001126112.2(TP53):c.344A>G (p.His115Arg)	Likely Benign	-1	-4	Gene-specific
TP53	NM_000546.5(TP53):c.107C>A (p.Pro36Gln)	Benign	-1	-4	Gene-specific
TP53	NM_000546.6(TP53):c.105G>C (p.Leu35Phe)	Likely Benign	-1	-4	Gene-specific
TP53	NM_000546.6(TP53):c.523C>G (p.Arg175Gly)	Pathogenic	2	4	Gene-specific
TP53	NM_000546.6(TP53):c.105G>T (p.Leu35Phe)	Uncertain Significance	-1	-4	Gene-specific
TP53	NM_000546.6(TP53):c.21T>A (p.Asp7Glu)	Likely Benign	-1	-4	Gene-specific
TP53	NM_000546.6(TP53):c.206C>G (p.Ala69Gly)	Uncertain Significance	-1	-4	Gene-specific
TP53	NM_000546.5(TP53):c.742C>T (p.Arg248Trp)	Pathogenic	2	4	Gene-specific
TP53	NM_000546.5(TP53):c.217G>A (p.Val73Met)	Benign	-1	-4	Gene-specific
TP53	NM_000546.6(TP53):c.743G>A (p.Arg248Gln)	Pathogenic	1	4	Gene-specific
TP53	NM_001126112.2(TP53):c.509C>T (p.Thr170Met)	Likely Benign	0	-4	Gene-specific
TP53	NM_000546.6(TP53):c.997C>T (p.Arg333Cys)	Likely Benign	1	-4	Gene-specific
TP53	NM_001126112.2(TP53):c.370T>A (p.Cys124Ser)	Likely Benign	2	-2	Gene-specific
TP53	NM_000546.6(TP53):c.329G>A (p.Arg110His)	Likely Benign	-1	-4	Gene-specific
TP53	NM_001126112.2(TP53):c.907A>G (p.Ser303Gly)	Likely Benign	-1	-4	Gene-specific
TP53	NM_001126112.2(TP53):c.469G>A (p.Val157Ile)	Likely Benign	-1	-4	Gene-specific
TP53	NM_000546.5(TP53):c.11C>T (p.Pro4Leu)	Likely Benign	-1	-4	Gene-specific
TP53	NM_000546.5(TP53):c.875A>G (p.Lys292Arg)	Likely Benign	-1	-4	Gene-specific
TP53	NM_000546.6(TP53):c.524G>T (p.Arg175Leu)	Likely Pathogenic	2	4	Gene-specific
TP53	NM_000546.5(TP53):c.538G>A (p.Glu180Lys)	Likely Pathogenic	1	4	Gene-specific
TP53	NM_000546.5(TP53):c.488A>G (p.Tyr163Cys)	Pathogenic	2	4	Gene-specific
TP53	NM_000546.5(TP53):c.1031T>C (p.Leu344Pro)	Likely Pathogenic	2	4	Gene-specific
TP53	NM_000546.5(TP53):c.1040C>A (p.Ala347Asp)	Pathogenic	0	4	Gene-specific
TP53	NM_000546.6(TP53):c.1079G>C (p.Gly360Ala)	Benign	-1	-4	Gene-specific
TP53	NM_000546.5(TP53):c.892G>A (p.Glu298Lys)	Benign	-1	-4	Gene-specific
TP53	NM_000546.5(TP53):c.935C>G (p.Thr312Ser)	Benign	-1	-4	Gene-specific
TP53	NM_000546.5(TP53):c.139C>T (p.Pro47Ser)	Benign	-1	-4	Gene-specific
TP53	NM_000546.5(TP53):c.393C>A (p.Asn131Lys)	Uncertain Significance	0	-3	Gene-specific
TP53	NM_000546.5(TP53):c.1003C>T (p.Arg335Cys)	Likely Benign	1	0	Gene-specific
TP53	NM_000546.6(TP53):c.143A>G (p.Asp48Gly)	Likely Benign	-1	-4	Gene-specific
TP53	NM_000546.5(TP53):c.886C>T (p.His296Tyr)	Likely Benign	-1	-4	Gene-specific
TP53	NM_001126112.2(TP53):c.250G>A (p.Ala84Thr)	Likely Benign	-1	-4	Gene-specific
TP53	NM_000546.6(TP53):c.523C>T (p.Arg175Cys)	Uncertain Significance	2	3	Gene-specific
TP53	NM_000546.5(TP53):c.554G>A (p.Ser185Asn)	Likely Benign	-1	-4	Gene-specific
TP53	NM_001126112.2(TP53):c.943T>A (p.Ser315Thr)	Likely Benign	-1	-4	Gene-specific
TP53	NM_000546.5(TP53):c.779C>A (p.Ser260Tyr)	Likely Benign	0	-4	Gene-specific
TP53	NM_000546.6(TP53):c.524G>A (p.Arg175His)	Pathogenic	1	4	Gene-specific
TP53	NM_000546.6(TP53):c.1025G>C (p.Arg342Pro)	Pathogenic	1	4	Gene-specific
TP53	NM_000546.5(TP53):c.517G>A (p.Val173Met)	Pathogenic	0	4	Gene-specific
TP53	NM_000546.5(TP53):c.641A>G (p.His214Arg)	Pathogenic	0	4	Gene-specific
TP53	NM_000546.5(TP53):c.532C>G (p.His178Asp)	Pathogenic	2	4	Gene-specific
TP53	NM_000546.6(TP53):c.883C>T (p.Pro295Ser)	Likely Benign	-1	-4	Gene-specific
TP53	NM_000546.5(TP53):c.1120G>C (p.Gly374Arg)	Benign	-1	-4	Gene-specific
TP53	NM_000546.5(TP53):c.869G>A (p.Arg290His)	Benign	-1	-4	Gene-specific
TP53	NM_000546.5(TP53):c.1096T>G (p.Ser366Ala)	Benign	-1	-4	Gene-specific
TP53	NM_000546.6(TP53):c.733G>A (p.Gly245Ser)	Pathogenic	1	4	Gene-specific
TP53	NM_000546.5(TP53):c.814G>A (p.Val272Met)	Pathogenic	0	4	Gene-specific
TP53	NM_001126112.2(TP53):c.711G>A (p.Met237Ile)	Pathogenic	0	4	Gene-specific
TP53	NM_000546.5(TP53):c.868C>T (p.Arg290Cys)	Likely Benign	-1	-4	Gene-specific
TP53	NM_000546.5(TP53):c.800G>A (p.Arg267Gln)	Uncertain Significance	1	2	Gene-specific
TP53	NM_001126112.2(TP53):c.998G>A (p.Arg333His)	Benign	-1	-4	Gene-specific
TP53	NM_000546.5(TP53):c.541C>A (p.Arg181Ser)	Uncertain Significance	2	4	Gene-specific
TP53	NM_001126112.2(TP53):c.569C>T (p.Pro190Leu)	Likely Pathogenic	2	0	Gene-specific
TP53	NM_000546.5(TP53):c.467G>A (p.Arg156His)	Uncertain Significance	0	-4	Gene-specific
TP53	NM_001126112.2(TP53):c.380C>A (p.Ser127Tyr)	Pathogenic	2	4	Gene-specific
TP53	NM_000546.5(TP53):c.28G>C (p.Val10Leu)	Likely Benign	-1	-4	Gene-specific
TP53	NM_000546.5(TP53):c.396G>C (p.Lys132Asn)	Likely Pathogenic	2	4	Gene-specific
TP53	NM_000546.5(TP53):c.1163A>C (p.Glu388Ala)	Likely Benign	-1	-4	Gene-specific
TP53	NM_001126112.2(TP53):c.607G>A (p.Val203Met)	Uncertain Significance	-1	0	Gene-specific
TP53	NM_000546.5(TP53):c.353C>T (p.Thr118Ile)	Likely Benign	2	0	Gene-specific
TP53	NM_000546.6(TP53):c.640C>T (p.His214Tyr)	Uncertain Significance	1	0	Gene-specific
TP53	NM_001126112.2(TP53):c.329G>C (p.Arg110Pro)	Pathogenic	0	3	Gene-specific
TP53	NM_000546.6(TP53):c.332T>A (p.Leu111Gln)	Pathogenic	2	4	Gene-specific
TP53	NM_000546.6(TP53):c.460G>C (p.Gly154Arg)	Uncertain Significance	2	0	Gene-specific
TP53	NM_000546.6(TP53):c.328C>T (p.Arg110Cys)	Uncertain Significance	-1	-4	Gene-specific
TP53	NM_000546.6(TP53):c.329G>T (p.Arg110Leu)	Pathogenic	1	-4	Gene-specific
TP53	NM_000546.6(TP53):c.490A>G (p.Lys164Glu)	Pathogenic	1	4	Gene-specific
TP53	NM_000546.6(TP53):c.413C>T (p.Ala138Val)	Likely Pathogenic	1	4	Gene-specific
TP53	NM_000546.5(TP53):c.511G>A (p.Glu171Lys)	Likely Benign	1	3	Gene-specific
TP53	NM_000546.6(TP53):c.641A>T (p.His214Leu)	Likely Pathogenic	1	0	Gene-specific
TP53	NM_000546.6(TP53):c.1009C>T (p.Arg337Cys)	Pathogenic	1	0	Gene-specific
TP53	NM_000546.6(TP53):c.328C>G (p.Arg110Gly)	Likely Pathogenic	-1	-4	Gene-specific
TP53	NM_000546.6(TP53):c.1010G>C (p.Arg337Pro)	Likely Pathogenic	1	4	Gene-specific
TP53	NM_000546.6(TP53):c.1009C>G (p.Arg337Gly)	Likely Pathogenic	-1	4	Gene-specific
TP53	NM_000546.6(TP53):c.413C>A (p.Ala138Asp)	Uncertain Significance	2	4	Gene-specific
TP53	NM_000546.6(TP53):c.412G>C (p.Ala138Pro)	Likely Pathogenic	1	4	Gene-specific
TP53	NM_000546.6(TP53):c.412G>A (p.Ala138Thr)	Uncertain Significance	1	0	Gene-specific
TP53	NM_000546.6(TP53):c.436T>G (p.Trp146Gly)	Uncertain Significance	-1	0	Gene-specific
TP53	NM_000546.6(TP53):c.784G>A (p.Gly262Ser)	Likely Benign	1	0	Gene-specific
TP53	NM_000546.6(TP53):c.946C>A (p.Pro316Thr)	Likely Benign	-1	-4	Gene-specific
TP53	NM_000546.6(TP53):c.1010G>T (p.Arg337Leu)	Likely Pathogenic	-1	4	Gene-specific
USH2A	NM_206933.4(USH2A):c.12874A>G (p.Asn4292Asp)	Likely Pathogenic	1	0	Gene-specific
USH2A	NM_206933.4(USH2A):c.14419G>A (p.Ala4807Thr)	Uncertain Significance	0	0	Gene-specific
USH2A	NM_206933.4(USH2A):c.9921T>G (p.Cys3307Trp)	Uncertain Significance	0	4	Gene-specific
USH2A	NM_206933.3(USH2A):c.5516T>A (p.Val1839Glu)	Likely Pathogenic	0	3	Gene-specific
USH2A	NM_206933.3(USH2A):c.2081G>A (p.Cys694Tyr)	Likely Pathogenic	1	4	Gene-specific
USH2A	NM_206933.2(USH2A):c.8177G>A (p.Gly2726Glu)	Uncertain Significance	0	0	Gene-specific
USH2A	NM_206933.2(USH2A):c.2522C>A (p.Ser841Tyr)	Benign	0	-1	Gene-specific
USH2A	NM_206933.4(USH2A):c.13396C>T (p.Pro4466Ser)	Uncertain Significance	-1	-2	Gene-specific
USH2A	NM_206933.2(USH2A):c.15562A>G (p.Ser5188Gly)	Benign	0	-2	Gene-specific
USH2A	NM_206933.4(USH2A):c.13808A>C (p.His4603Pro)	Likely Pathogenic	0	0	Gene-specific
USH2A	NM_206933.2(USH2A):c.8320G>A (p.Ala2774Thr)	Likely Benign	-1	-3	Gene-specific
USH2A	NM_206933.3(USH2A):c.9433C>T (p.Leu3145Phe)	Uncertain Significance	0	0	Gene-specific
USH2A	NM_206933.2(USH2A):c.5581G>A (p.Gly1861Ser)	Pathogenic	1	0	Gene-specific
USH2A	NM_206933.4(USH2A):c.15494C>G (p.Ala5165Gly)	Likely Benign	-1	-3	Gene-specific
USH2A	NM_206933.2(USH2A):c.15433G>A (p.Val5145Ile)	Benign	-1	-3	Gene-specific
USH2A	NM_206933.2(USH2A):c.2276G>T (p.Cys759Phe)	Pathogenic	1	4	Gene-specific
USH2A	NM_206933.2(USH2A):c.4714C>T (p.Leu1572Phe)	Likely Benign	0	0	Gene-specific
USH2A	NM_206933.3(USH2A):c.13217T>C (p.Leu4406Pro)	Uncertain Significance	0	1	Gene-specific
USH2A	NM_206933.3(USH2A):c.12575G>A (p.Arg4192His)	Benign	-1	-3	Gene-specific
USH2A	NM_206933.4(USH2A):c.6233C>G (p.Pro2078Arg)	Uncertain Significance	1	3	Gene-specific
USH2A	NM_206933.3(USH2A):c.7334C>T (p.Ser2445Phe)	Benign	0	0	Gene-specific
USH2A	NM_206933.2(USH2A):c.5039A>G (p.Lys1680Arg)	Uncertain Significance	0	-3	Gene-specific
USH2A	NM_206933.2(USH2A):c.14276G>A (p.Gly4759Glu)	Likely Benign	0	-3	Gene-specific
USH2A	NM_206933.4(USH2A):c.6446C>A (p.Pro2149Gln)	Uncertain Significance	0	3	Gene-specific
USH2A	NM_206933.4(USH2A):c.12505A>G (p.Thr4169Ala)	Likely Benign	0	-3	Gene-specific
USH2A	NM_206933.4(USH2A):c.1966G>A (p.Asp656Asn)	Likely Benign	-1	-3	Gene-specific
ANO5	NM_213599.3(ANO5):c.2272C>T (p.Arg758Cys)	Pathogenic	1	1	Domain-aggregate
ANO5	NM_213599.3(ANO5):c.2018A>G (p.Tyr673Cys)	Pathogenic	1	2	Domain-aggregate
ANO5	NM_213599.3(ANO5):c.616A>G (p.Thr206Ala)	Benign	0	-3	Domain-aggregate
ANO5	NM_213599.3(ANO5):c.172C>T (p.Arg58Trp)	Pathogenic	0	2	Domain-aggregate
RAF1	NM_002880.4(RAF1):c.119G>A (p.Arg40His)	Benign	-1	-1	Domain-aggregate
RAF1	NM_002880.3(RAF1):c.94A>G (p.Ile32Val)	Benign	-1	-4	Domain-aggregate
RAF1	NM_002880.3(RAF1):c.769T>C (p.Ser257Pro)	Likely Pathogenic	0	4	Domain-aggregate
RAF1	NM_002880.4(RAF1):c.1193G>T (p.Arg398Leu)	Uncertain Significance	1	1	Domain-aggregate
RAF1	NM_002880.3(RAF1):c.907A>G (p.Thr303Ala)	Likely Benign	0	-2	Domain-aggregate
RAF1	NM_002880.3(RAF1):c.125C>T (p.Ala42Val)	Likely Benign	0	-1	Domain-aggregate
RAF1	NM_002880.4(RAF1):c.768G>T (p.Arg256Ser)	Likely Pathogenic	0	4	Domain-aggregate
RAF1	NM_002880.3(RAF1):c.776C>A (p.Ser259Tyr)	Pathogenic	0	4	Domain-aggregate
RAF1	NM_002880.4(RAF1):c.1472C>T (p.Thr491Ile)	Pathogenic	1	1	Domain-aggregate
RAF1	NM_002880.4(RAF1):c.935T>C (p.Val312Ala)	Likely Benign	-1	-3	Domain-aggregate
RAF1	NM_002880.3(RAF1):c.788T>G (p.Val263Gly)	Pathogenic	1	4	Domain-aggregate
RAF1	NM_002880.3(RAF1):c.1082G>C (p.Gly361Ala)	Pathogenic	1	1	Domain-aggregate
RAF1	NM_002880.3(RAF1):c.124G>A (p.Ala42Thr)	Likely Benign	0	-2	Domain-aggregate
RAF1	NM_002880.3(RAF1):c.1141G>A (p.Asp381Asn)	Benign	0	-3	Domain-aggregate
RAF1	NM_002880.4(RAF1):c.1837C>G (p.Leu613Val)	Pathogenic	0	0	Domain-aggregate
RAF1	NM_002880.4(RAF1):c.775T>A (p.Ser259Thr)	Pathogenic	1	3	Domain-aggregate
RAF1	NM_001354689.3(RAF1):c.775T>G (p.Ser259Ala)	Pathogenic	0	3	Domain-aggregate
RAF1	NM_002880.3(RAF1):c.212A>G (p.Asn71Ser)	Benign	0	-3	Domain-aggregate
RAF1	NM_002880.3(RAF1):c.66T>G (p.Phe22Leu)	Likely Benign	0	0	Domain-aggregate
RAF1	NM_002880.3(RAF1):c.770C>T (p.Ser257Leu)	Pathogenic	0	3	Domain-aggregate
RAF1	NM_002880.3(RAF1):c.781C>T (p.Pro261Ser)	Pathogenic	0	4	Domain-aggregate
RAF1	NM_002880.3(RAF1):c.923C>T (p.Pro308Leu)	Benign	0	-3	Domain-aggregate
GP9	NM_000174.5(GP9):c.259T>C (p.Trp87Arg)	Uncertain Significance	1	4	Domain-aggregate
GP9	NM_000174.5(GP9):c.70T>C (p.Cys24Arg)	Likely Pathogenic	1	4	Domain-aggregate
GP9	NM_000174.5(GP9):c.488C>A (p.Ala163Asp)	Likely Benign	0	1	Domain-aggregate
GP9	NM_000174.5(GP9):c.236C>T (p.Thr79Ile)	Benign	0	-2	Domain-aggregate
GP9	NM_000174.5(GP9):c.368C>T (p.Pro123Leu)	Benign	0	-2	Domain-aggregate
SGCA	NM_000023.4(SGCA):c.850C>T (p.Arg284Cys)	Pathogenic	1	0	Domain-aggregate
SGCA	NM_000023.4(SGCA):c.229C>T (p.Arg77Cys)	Pathogenic	1	0	Domain-aggregate
SGCA	NM_000023.4(SGCA):c.101G>A (p.Arg34His)	Likely Pathogenic	1	-3	Domain-aggregate
SGCA	NM_000023.4(SGCA):c.661C>T (p.Arg221Cys)	Uncertain Significance	1	0	Domain-aggregate
SGCA	NM_000023.4(SGCA):c.320C>T (p.Ala107Val)	Benign	1	0	Domain-aggregate
SGCA	NM_000023.4(SGCA):c.241C>T (p.Arg81Cys)	Likely Pathogenic	1	0	Domain-aggregate
SGCA	NM_000023.4(SGCA):c.700G>A (p.Asp234Asn)	Likely Pathogenic	0	0	Domain-aggregate
SGCA	NM_000023.4(SGCA):c.100C>T (p.Arg34Cys)	Likely Pathogenic	1	-1	Domain-aggregate
SGCA	NM_000023.4(SGCA):c.662G>C (p.Arg221Pro)	Likely Pathogenic	1	2	Domain-aggregate
SGCA	NM_000023.4(SGCA):c.1120C>T (p.Arg374Cys)	Benign	0	-2	Domain-aggregate
ADA	NM_000022.4(ADA):c.984T>A (p.Asn328Lys)	Uncertain Significance	0	0	Domain-aggregate
ADA	NM_000022.4(ADA):c.618G>T (p.Lys206Asn)	Uncertain Significance	0	0	Domain-aggregate
ADA	NM_000022.4(ADA):c.574A>G (p.Ser192Gly)	Uncertain Significance	0	-3	Domain-aggregate
ADA	NM_000022.4(ADA):c.938G>A (p.Arg313Gln)	Uncertain Significance	0	-3	Domain-aggregate
ADA	NM_000022.4(ADA):c.902A>T (p.Lys301Met)	Uncertain Significance	0	0	Domain-aggregate
ADA	NM_000022.4(ADA):c.899T>G (p.Phe300Cys)	Uncertain Significance	0	1	Domain-aggregate
ADA	NM_000022.4(ADA):c.845G>A (p.Arg282Gln)	Pathogenic	0	-3	Domain-aggregate
ADA	NM_000022.4(ADA):c.608A>C (p.Glu203Ala)	Uncertain Significance	0	-2	Domain-aggregate
ADA	NM_000022.4(ADA):c.591T>A (p.His197Gln)	Likely Benign	0	2	Domain-aggregate
ADA	NM_000022.4(ADA):c.446G>A (p.Arg149Gln)	Uncertain Significance	0	0	Domain-aggregate
ADA	NM_000022.4(ADA):c.715G>A (p.Gly239Ser)	Uncertain Significance	0	1	Domain-aggregate
ADA	NM_000022.4(ADA):c.622G>A (p.Gly208Ser)	Uncertain Significance	0	-1	Domain-aggregate
ADA	NM_000022.4(ADA):c.569G>A (p.Gly190Glu)	Uncertain Significance	0	-2	Domain-aggregate
ADA	NM_000022.4(ADA):c.937C>T (p.Arg313Trp)	Uncertain Significance	0	-1	Domain-aggregate
ADA	NM_000022.4(ADA):c.632G>A (p.Arg211His)	Pathogenic	0	0	Domain-aggregate
ADA	NM_000022.4(ADA):c.572G>A (p.Ser191Asn)	Uncertain Significance	0	-1	Domain-aggregate
ADA	NM_000022.4(ADA):c.940G>T (p.Asp314Tyr)	Uncertain Significance	0	-2	Domain-aggregate
ADA	NM_000022.4(ADA):c.935A>G (p.Lys312Arg)	Uncertain Significance	0	-3	Domain-aggregate
ADA	NM_000022.4(ADA):c.890C>T (p.Pro297Leu)	Likely Pathogenic	0	1	Domain-aggregate
ADA	NM_000022.4(ADA):c.703C>T (p.Arg235Trp)	Likely Pathogenic	0	2	Domain-aggregate
ADA	NM_000022.4(ADA):c.425G>A (p.Arg142Gln)	Benign	0	-3	Domain-aggregate
ADA	NM_000022.4(ADA):c.596A>G (p.Gln199Arg)	Uncertain Significance	0	-3	Domain-aggregate
ADA	NM_000022.4(ADA):c.578T>A (p.Leu193His)	Uncertain Significance	0	-1	Domain-aggregate
ADA	NM_000022.4(ADA):c.575G>A (p.Ser192Asn)	Uncertain Significance	0	-1	Domain-aggregate
ADA	NM_000022.4(ADA):c.539T>C (p.Ile180Thr)	Uncertain Significance	0	1	Domain-aggregate
ADA	NM_000022.4(ADA):c.934A>C (p.Lys312Gln)	Uncertain Significance	0	-3	Domain-aggregate
ADA	NM_000022.4(ADA):c.646G>A (p.Gly216Arg)	Pathogenic	0	2	Domain-aggregate
ADA	NM_000022.4(ADA):c.454C>A (p.Leu152Met)	Uncertain Significance	0	1	Domain-aggregate
ADA	NM_000022.4(ADA):c.445C>T (p.Arg149Trp)	Likely Pathogenic	0	0	Domain-aggregate
ADA	NM_000022.4(ADA):c.631C>T (p.Arg211Cys)	Likely Pathogenic	0	0	Domain-aggregate
NRAS	NM_002524.5(NRAS):c.149C>T (p.Thr50Ile)	Pathogenic	0	-1	Domain-aggregate
NRAS	NM_002524.5(NRAS):c.71T>A (p.Ile24Asn)	Likely Pathogenic	1	1	Domain-aggregate
NRAS	NM_002524.5(NRAS):c.553C>T (p.Pro185Ser)	Uncertain Significance	-1	-2	Domain-aggregate
NRAS	NM_002524.5(NRAS):c.250A>G (p.Ile84Val)	Uncertain Significance	-1	-3	Domain-aggregate
NRAS	NM_002524.5(NRAS):c.179G>A (p.Gly60Glu)	Pathogenic	1	1	Domain-aggregate
NRAS	NM_002524.5(NRAS):c.173C>T (p.Thr58Ile)	Pathogenic	1	1	Domain-aggregate
NRAS	NM_002524.5(NRAS):c.34G>A (p.Gly12Ser)	Pathogenic	0	1	Domain-aggregate
NRAS	NM_002524.5(NRAS):c.368G>A (p.Arg123Lys)	Uncertain Significance	1	0	Domain-aggregate
PAH	NM_000277.3(PAH):c.452A>G (p.Asp151Gly)	Likely Pathogenic	4	2	Domain-aggregate
PAH	NM_000277.3(PAH):c.1001G>C (p.Cys334Ser)	Likely Pathogenic	4	2	Domain-aggregate
PAH	NM_000277.2(PAH):c.737C>T (p.Ala246Val)	Likely Pathogenic	2	2	Domain-aggregate
PAH	NM_000277.3(PAH):c.587C>A (p.Ser196Tyr)	Uncertain Significance	0	-2	Domain-aggregate
PAH	NM_000277.3(PAH):c.870T>G (p.His290Gln)	Likely Pathogenic	1	2	Domain-aggregate
PAH	NM_000277.3(PAH):c.938C>T (p.Ala313Val)	Pathogenic	2	0	Domain-aggregate
PAH	NM_000277.2(PAH):c.718T>G (p.Phe240Val)	Likely Pathogenic	4	2	Domain-aggregate
PAH	NM_000277.3(PAH):c.451G>C (p.Asp151His)	Likely Pathogenic	4	2	Domain-aggregate
PAH	NM_000277.3(PAH):c.1007A>G (p.Gln336Arg)	Likely Pathogenic	4	0	Domain-aggregate
PAH	NM_000277.1(PAH):c.929C>T (p.Ser310Phe)	Pathogenic	1	2	Domain-aggregate
PAH	NM_000277.1(PAH):c.940C>A (p.Pro314Thr)	Pathogenic	0	-1	Domain-aggregate
PAH	NM_000277.2(PAH):c.512G>C (p.Gly171Ala)	Likely Pathogenic	2	0	Domain-aggregate
PAH	NM_000277.3(PAH):c.1204T>C (p.Phe402Leu)	Likely Pathogenic	2	2	Domain-aggregate
PAH	NM_000277.3(PAH):c.1175T>C (p.Phe392Ser)	Likely Pathogenic	4	2	Domain-aggregate
PAH	NM_000277.1(PAH):c.1039C>T (p.Leu347Phe)	Likely Pathogenic	4	2	Domain-aggregate
PAH	NM_000277.2(PAH):c.704A>C (p.Gln235Pro)	Likely Pathogenic	4	1	Domain-aggregate
PAH	NM_000277.3(PAH):c.241A>C (p.Thr81Pro)	Likely Pathogenic	1	1	Domain-aggregate
PAH	NM_000277.3(PAH):c.479A>C (p.Gln160Pro)	Uncertain Significance	1	1	Domain-aggregate
PAH	NM_000277.3(PAH):c.283A>T (p.Ile95Phe)	Likely Pathogenic	1	0	Domain-aggregate
PAH	NM_000277.2(PAH):c.782G>T (p.Arg261Leu)	Likely Pathogenic	4	2	Domain-aggregate
PAH	NM_000277.3(PAH):c.232G>A (p.Glu78Lys)	Likely Pathogenic	2	3	Domain-aggregate
PAH	NM_000277.3(PAH):c.533A>T (p.Glu178Val)	Likely Pathogenic	2	-1	Domain-aggregate
PAH	NM_000277.3(PAH):c.1237C>A (p.Arg413Ser)	Pathogenic	4	1	Domain-aggregate
PAH	NM_000277.1(PAH):c.466G>C (p.Ala156Pro)	Pathogenic	0	2	Domain-aggregate
PAH	NM_000277.1(PAH):c.922C>T (p.Leu308Phe)	Pathogenic	1	1	Domain-aggregate
PAH	NM_000277.1(PAH):c.964G>A (p.Ala322Thr)	Pathogenic	1	0	Domain-aggregate
PAH	NM_000277.2(PAH):c.307G>T (p.Gly103Cys)	Uncertain Significance	2	0	Domain-aggregate
PAH	NM_000277.3(PAH):c.122T>C (p.Leu41Pro)	Likely Pathogenic	2	3	Domain-aggregate
PAH	NM_000277.3(PAH):c.1022A>C (p.Lys341Thr)	Likely Pathogenic	4	1	Domain-aggregate
PAH	NM_000277.2(PAH):c.250G>T (p.Asp84Tyr)	Pathogenic	1	0	Domain-aggregate
PAH	NM_000277.2(PAH):c.1301C>A (p.Ala434Asp)	Pathogenic	1	2	Domain-aggregate
PAH	NM_000277.2(PAH):c.793T>G (p.Cys265Gly)	Uncertain Significance	1	-1	Domain-aggregate
PAH	NM_000277.3(PAH):c.1130A>G (p.Tyr377Cys)	Likely Pathogenic	1	0	Domain-aggregate
PAH	NM_000277.3(PAH):c.743T>G (p.Leu248Arg)	Uncertain Significance	1	2	Domain-aggregate
PAH	NM_000277.1(PAH):c.982A>G (p.Thr328Ala)	Likely Pathogenic	1	1	Domain-aggregate
PAH	NM_000277.2(PAH):c.833C>A (p.Thr278Asn)	Pathogenic	1	2	Domain-aggregate
PAH	NM_000277.2(PAH):c.737C>A (p.Ala246Asp)	Uncertain Significance	1	2	Domain-aggregate
PAH	NM_000277.1(PAH):c.665A>T (p.Asp222Val)	Likely Pathogenic	1	-1	Domain-aggregate
PAH	NM_000277.1(PAH):c.1114A>T (p.Thr372Ser)	Likely Pathogenic	0	0	Domain-aggregate
PAH	NM_000277.2(PAH):c.830A>G (p.Tyr277Cys)	Pathogenic	1	1	Domain-aggregate
PAH	NM_000277.1(PAH):c.631C>A (p.Pro211Thr)	Pathogenic	1	-1	Domain-aggregate
PAH	NM_000277.3(PAH):c.157C>T (p.Arg53Cys)	Likely Pathogenic	1	-1	Domain-aggregate
PAH	NM_000277.2(PAH):c.1031G>T (p.Gly344Val)	Uncertain Significance	1	2	Domain-aggregate
PAH	NM_000277.1(PAH):c.1054G>C (p.Gly352Arg)	Likely Pathogenic	1	1	Domain-aggregate
PAH	NM_000277.2(PAH):c.1033G>T (p.Ala345Ser)	Pathogenic	1	0	Domain-aggregate
PAH	NM_000277.3(PAH):c.1262T>C (p.Ile421Thr)	Likely Pathogenic	1	0	Domain-aggregate
PAH	NM_000277.3(PAH):c.911A>G (p.Gln304Arg)	Likely Pathogenic	1	2	Domain-aggregate
PAH	NM_000277.3(PAH):c.1112A>G (p.Lys371Arg)	Uncertain Significance	0	-2	Domain-aggregate
PAH	NM_000277.3(PAH):c.828G>T (p.Met276Ile)	Uncertain Significance	0	1	Domain-aggregate
PAH	NM_000277.3(PAH):c.532G>A (p.Glu178Lys)	Pathogenic	0	-2	Domain-aggregate
PAH	NM_000277.3(PAH):c.443G>T (p.Gly148Val)	Likely Pathogenic	1	2	Domain-aggregate
PAH	NM_000277.3(PAH):c.505C>G (p.Arg169Gly)	Pathogenic	1	0	Domain-aggregate
PAH	NM_000277.3(PAH):c.527G>A (p.Arg176Gln)	Pathogenic	0	-2	Domain-aggregate
PAH	NM_000277.2(PAH):c.140C>T (p.Ala47Val)	Likely Pathogenic	0	0	Domain-aggregate
PAH	NM_000277.3(PAH):c.1237C>T (p.Arg413Cys)	Uncertain Significance	1	-1	Domain-aggregate
PAH	NM_000277.1(PAH):c.601C>T (p.His201Tyr)	Likely Pathogenic	0	-1	Domain-aggregate
PAH	NM_000277.3(PAH):c.442G>A (p.Gly148Ser)	Likely Pathogenic	1	0	Domain-aggregate
PAH	NM_000277.1(PAH):c.965C>G (p.Ala322Gly)	Likely Pathogenic	1	0	Domain-aggregate
PAH	NM_000277.1(PAH):c.754C>G (p.Arg252Gly)	Pathogenic	1	2	Domain-aggregate
PAH	NM_000277.1(PAH):c.842C>T (p.Pro281Leu)	Likely Pathogenic	1	2	Domain-aggregate
PAH	NM_000277.1(PAH):c.841C>T (p.Pro281Ser)	Likely Pathogenic	1	2	Domain-aggregate
PAH	NM_000277.2(PAH):c.895T>C (p.Phe299Leu)	Uncertain Significance	1	2	Domain-aggregate
PAH	NM_000277.1(PAH):c.805A>C (p.Ile269Leu)	Pathogenic	1	-1	Domain-aggregate
PAH	NM_000277.2(PAH):c.591G>C (p.Leu197Phe)	Likely Pathogenic	1	-1	Domain-aggregate
PAH	NM_000277.2(PAH):c.440C>T (p.Pro147Leu)	Likely Pathogenic	1	1	Domain-aggregate
PAH	NM_000277.2(PAH):c.194T>C (p.Ile65Thr)	Pathogenic	1	3	Domain-aggregate
PAH	NM_000277.2(PAH):c.125A>T (p.Lys42Ile)	Likely Pathogenic	0	0	Domain-aggregate
PAH	NM_000277.2(PAH):c.385G>T (p.Asp129Tyr)	Uncertain Significance	1	2	Domain-aggregate
PAH	NM_000277.2(PAH):c.464G>A (p.Arg155His)	Pathogenic	1	0	Domain-aggregate
PAH	NM_000277.2(PAH):c.818C>T (p.Ser273Phe)	Likely Pathogenic	1	0	Domain-aggregate
PAH	NM_000277.2(PAH):c.289A>C (p.Ile97Leu)	Uncertain Significance	-1	-3	Domain-aggregate
PAH	NM_000277.2(PAH):c.940C>T (p.Pro314Ser)	Pathogenic	0	-1	Domain-aggregate
PAH	NM_000277.2(PAH):c.864G>C (p.Leu288Phe)	Uncertain Significance	1	0	Domain-aggregate
PAH	NM_000277.2(PAH):c.568G>A (p.Val190Met)	Uncertain Significance	1	0	Domain-aggregate
PAH	NM_000277.2(PAH):c.187A>C (p.Thr63Pro)	Uncertain Significance	0	0	Domain-aggregate
PAH	NM_000277.2(PAH):c.176A>G (p.Asp59Gly)	Uncertain Significance	0	-3	Domain-aggregate
PAH	NM_000277.2(PAH):c.800A>T (p.Gln267Leu)	Uncertain Significance	1	0	Domain-aggregate
PAH	NM_000277.1(PAH):c.1222C>T (p.Arg408Trp)	Pathogenic	1	2	Domain-aggregate
PAH	NM_000277.1(PAH):c.782G>A (p.Arg261Gln)	Pathogenic	1	1	Domain-aggregate
PAH	NM_000277.1(PAH):c.1162G>A (p.Val388Met)	Pathogenic	1	0	Domain-aggregate
PAH	NM_000277.1(PAH):c.722G>A (p.Arg241His)	Pathogenic	1	-2	Domain-aggregate
PAH	NM_000277.1(PAH):c.926C>T (p.Ala309Val)	Pathogenic	1	0	Domain-aggregate
PAH	NM_000277.2(PAH):c.801G>C (p.Gln267His)	Likely Pathogenic	1	2	Domain-aggregate
PAH	NM_000277.2(PAH):c.799C>G (p.Gln267Glu)	Pathogenic	1	0	Domain-aggregate
PAH	NM_000277.2(PAH):c.824C>G (p.Pro275Arg)	Likely Pathogenic	1	1	Domain-aggregate
PAH	NM_000277.2(PAH):c.796A>C (p.Thr266Pro)	Likely Pathogenic	1	2	Domain-aggregate
PAH	NM_000277.2(PAH):c.785T>G (p.Val262Gly)	Likely Pathogenic	1	2	Domain-aggregate
PAH	NM_000277.2(PAH):c.769G>T (p.Gly257Cys)	Likely Pathogenic	4	2	Domain-aggregate
PAH	NM_000277.3(PAH):c.205C>T (p.Pro69Ser)	Likely Pathogenic	0	0	Domain-aggregate
PAH	NM_000277.3(PAH):c.535T>C (p.Tyr179His)	Likely Pathogenic	1	2	Domain-aggregate
PAH	NM_000277.2(PAH):c.175G>T (p.Asp59Tyr)	Uncertain Significance	0	-1	Domain-aggregate
PAH	NM_000277.2(PAH):c.743T>C (p.Leu248Pro)	Uncertain Significance	1	2	Domain-aggregate
PAH	NM_000277.1(PAH):c.833C>T (p.Thr278Ile)	Pathogenic	1	2	Domain-aggregate
PAH	NM_000277.2(PAH):c.1012G>T (p.Asp338Tyr)	Pathogenic	0	-1	Domain-aggregate
PAH	NM_000277.2(PAH):c.733G>A (p.Val245Met)	Pathogenic	1	2	Domain-aggregate
PAH	NM_000277.2(PAH):c.293T>C (p.Leu98Ser)	Likely Pathogenic	1	3	Domain-aggregate
PAH	NM_000277.1(PAH):c.724C>T (p.Leu242Phe)	Pathogenic	1	1	Domain-aggregate
PAH	NM_000277.1(PAH):c.1159T>C (p.Tyr387His)	Likely Pathogenic	1	0	Domain-aggregate
PAH	NM_000277.3(PAH):c.1157A>G (p.Tyr386Cys)	Pathogenic	1	1	Domain-aggregate
PAH	NM_000277.1(PAH):c.649T>G (p.Cys217Gly)	Likely Pathogenic	0	-1	Domain-aggregate
PAH	NM_000277.1(PAH):c.202A>G (p.Arg68Gly)	Pathogenic	1	3	Domain-aggregate
PAH	NM_000277.2(PAH):c.1031G>A (p.Gly344Asp)	Likely Pathogenic	1	2	Domain-aggregate
PAH	NM_000277.2(PAH):c.608G>A (p.Cys203Tyr)	Likely Pathogenic	1	2	Domain-aggregate
PAH	NM_000277.3(PAH):c.907T>G (p.Ser303Ala)	Likely Pathogenic	1	0	Domain-aggregate
PAH	NM_000277.3(PAH):c.1247C>A (p.Pro416Gln)	Likely Pathogenic	1	0	Domain-aggregate
PAH	NM_000277.3(PAH):c.161T>C (p.Leu54Ser)	Likely Pathogenic	1	0	Domain-aggregate
PAH	NM_000277.2(PAH):c.712A>C (p.Thr238Pro)	Likely Pathogenic	1	2	Domain-aggregate
PAH	NM_000277.3(PAH):c.1162G>C (p.Val388Leu)	Pathogenic	0	0	Domain-aggregate
PAH	NM_000277.3(PAH):c.865G>A (p.Gly289Arg)	Pathogenic	1	2	Domain-aggregate
PAH	NM_000277.3(PAH):c.527G>T (p.Arg176Leu)	Pathogenic	0	-1	Domain-aggregate
PAH	NM_000277.3(PAH):c.439C>T (p.Pro147Ser)	Likely Pathogenic	1	2	Domain-aggregate
PAH	NM_000277.3(PAH):c.280A>G (p.Ile94Val)	Uncertain Significance	0	-3	Domain-aggregate
PAH	NM_000277.2(PAH):c.809G>A (p.Arg270Lys)	Pathogenic	1	2	Domain-aggregate
PAH	NM_000277.2(PAH):c.1069T>G (p.Cys357Gly)	Likely Pathogenic	1	0	Domain-aggregate
PAH	NM_000277.2(PAH):c.731C>T (p.Pro244Leu)	Likely Pathogenic	1	2	Domain-aggregate
PAH	NM_000277.2(PAH):c.183C>G (p.Asn61Lys)	Likely Pathogenic	0	1	Domain-aggregate
PAH	NM_000277.3(PAH):c.1304A>T (p.Asp435Val)	Likely Pathogenic	0	-1	Domain-aggregate
PAH	NM_000277.3(PAH):c.1171A>G (p.Ser391Gly)	Uncertain Significance	1	-1	Domain-aggregate
PAH	NM_000277.1(PAH):c.981T>G (p.Phe327Leu)	Uncertain Significance	1	2	Domain-aggregate
PAH	NM_000277.3(PAH):c.1109A>G (p.Glu370Gly)	Likely Pathogenic	0	-2	Domain-aggregate
PAH	NM_000277.2(PAH):c.1172G>C (p.Ser391Thr)	Likely Pathogenic	0	-1	Domain-aggregate
PAH	NM_000277.3(PAH):c.136G>A (p.Gly46Ser)	Pathogenic	0	2	Domain-aggregate
PAH	NM_000277.1(PAH):c.212G>A (p.Arg71His)	Likely Pathogenic	1	-2	Domain-aggregate
PAH	NM_000277.2(PAH):c.887A>G (p.Asp296Gly)	Uncertain Significance	1	2	Domain-aggregate
PAH	NM_000277.2(PAH):c.1240T>C (p.Tyr414His)	Uncertain Significance	1	2	Domain-aggregate
PAH	NM_000277.2(PAH):c.523C>T (p.Pro175Ser)	Likely Pathogenic	1	0	Domain-aggregate
PAH	NM_000277.2(PAH):c.464G>C (p.Arg155Pro)	Likely Pathogenic	1	2	Domain-aggregate
PAH	NM_000277.2(PAH):c.500A>T (p.Asn167Ile)	Likely Pathogenic	0	0	Domain-aggregate
PAH	NM_000277.2(PAH):c.490A>G (p.Ile164Val)	Likely Pathogenic	0	-2	Domain-aggregate
PAH	NM_000277.2(PAH):c.242C>A (p.Thr81Asn)	Likely Pathogenic	1	0	Domain-aggregate
PAH	NM_000277.2(PAH):c.848T>A (p.Ile283Asn)	Pathogenic	1	1	Domain-aggregate
PAH	NM_000277.2(PAH):c.190C>A (p.His64Asn)	Uncertain Significance	1	1	Domain-aggregate
PAH	NM_000277.2(PAH):c.164T>C (p.Phe55Ser)	Likely Pathogenic	1	3	Domain-aggregate
PAH	NM_000277.2(PAH):c.812A>G (p.His271Arg)	Likely Pathogenic	1	2	Domain-aggregate
PAH	NM_000277.2(PAH):c.734T>C (p.Val245Ala)	Pathogenic	0	0	Domain-aggregate
PAH	NM_000277.1(PAH):c.1241A>G (p.Tyr414Cys)	Pathogenic	1	1	Domain-aggregate
PAH	NM_000277.1(PAH):c.1238G>C (p.Arg413Pro)	Pathogenic	1	2	Domain-aggregate
PAH	NM_000277.1(PAH):c.1139C>T (p.Thr380Met)	Pathogenic	1	-1	Domain-aggregate
PAH	NM_000277.2(PAH):c.823C>T (p.Pro275Ser)	Pathogenic	1	1	Domain-aggregate
PAH	NM_000277.2(PAH):c.533A>G (p.Glu178Gly)	Pathogenic	2	-1	Domain-aggregate
PAH	NM_000277.3(PAH):c.620A>G (p.Asn207Ser)	Likely Pathogenic	1	-1	Domain-aggregate
PAH	NM_000277.3(PAH):c.1144T>C (p.Phe382Leu)	Pathogenic	1	2	Domain-aggregate
PAH	NM_000277.3(PAH):c.1117G>A (p.Ala373Thr)	Likely Pathogenic	0	-1	Domain-aggregate
PAH	NM_000277.3(PAH):c.208T>C (p.Ser70Pro)	Likely Pathogenic	1	2	Domain-aggregate
PAH	NM_000277.2(PAH):c.794G>A (p.Cys265Tyr)	Likely Pathogenic	1	2	Domain-aggregate
PAH	NM_000277.2(PAH):c.770G>T (p.Gly257Val)	Pathogenic	1	2	Domain-aggregate
PAH	NM_000277.1(PAH):c.899C>T (p.Ala300Val)	Likely Pathogenic	1	2	Domain-aggregate
PAH	NM_000277.1(PAH):c.1181A>C (p.Asp394Ala)	Likely Pathogenic	1	-1	Domain-aggregate
PAH	NM_000277.1(PAH):c.665A>G (p.Asp222Gly)	Likely Pathogenic	0	-2	Domain-aggregate
PAH	NM_000277.1(PAH):c.635T>C (p.Leu212Pro)	Likely Pathogenic	1	2	Domain-aggregate
PAH	NM_000277.3(PAH):c.1150C>T (p.Pro384Ser)	Uncertain Significance	1	-1	Domain-aggregate
PAH	NM_000277.2(PAH):c.1030G>C (p.Gly344Arg)	Uncertain Significance	1	2	Domain-aggregate
PAH	NM_000277.1(PAH):c.673C>G (p.Pro225Ala)	Likely Pathogenic	1	1	Domain-aggregate
PAH	NM_000277.3(PAH):c.529G>C (p.Val177Leu)	Pathogenic	0	0	Domain-aggregate
PAH	NM_000277.3(PAH):c.516G>T (p.Gln172His)	Likely Pathogenic	0	-1	Domain-aggregate
PAH	NM_000277.3(PAH):c.563G>A (p.Gly188Asp)	Likely Pathogenic	1	0	Domain-aggregate
PAH	NM_000277.3(PAH):c.850T>C (p.Cys284Arg)	Likely Pathogenic	1	2	Domain-aggregate
PAH	NM_000277.1(PAH):c.716G>T (p.Gly239Val)	Likely Pathogenic	1	2	Domain-aggregate
PAH	NM_000277.1(PAH):c.935G>A (p.Gly312Asp)	Likely Pathogenic	1	2	Domain-aggregate
PAH	NM_000277.3(PAH):c.1229T>G (p.Phe410Cys)	Likely Pathogenic	1	2	Domain-aggregate
PAH	NM_000277.3(PAH):c.121C>T (p.Leu41Phe)	Pathogenic	0	0	Domain-aggregate
PAH	NM_000277.2(PAH):c.974A>G (p.Tyr325Cys)	Likely Pathogenic	1	2	Domain-aggregate
PAH	NM_000277.3(PAH):c.461A>T (p.Tyr154Phe)	Likely Pathogenic	1	0	Domain-aggregate
PAH	NM_000277.2(PAH):c.1163T>C (p.Val388Ala)	Likely Pathogenic	1	0	Domain-aggregate
PAH	NM_000277.2(PAH):c.889C>T (p.Arg297Cys)	Likely Pathogenic	1	-1	Domain-aggregate
PAH	NM_000277.2(PAH):c.890G>A (p.Arg297His)	Pathogenic	1	-2	Domain-aggregate
PAH	NM_000277.2(PAH):c.781C>G (p.Arg261Gly)	Uncertain Significance	1	2	Domain-aggregate
PAH	NM_000277.2(PAH):c.158G>A (p.Arg53His)	Uncertain Significance	0	-2	Domain-aggregate
PAH	NM_000277.2(PAH):c.521T>C (p.Ile174Thr)	Pathogenic	1	2	Domain-aggregate
PAH	NM_000277.2(PAH):c.143T>C (p.Leu48Ser)	Pathogenic	1	4	Domain-aggregate
PAH	NM_000277.2(PAH):c.472C>T (p.Arg158Trp)	Pathogenic	1	2	Domain-aggregate
PAH	NM_000277.2(PAH):c.506G>A (p.Arg169His)	Likely Pathogenic	0	-1	Domain-aggregate
PAH	NM_000277.2(PAH):c.350C>T (p.Thr117Ile)	Uncertain Significance	0	0	Domain-aggregate
PAH	NM_000277.2(PAH):c.1217T>C (p.Ile406Thr)	Likely Pathogenic	1	2	Domain-aggregate
PAH	NM_000277.2(PAH):c.1100T>C (p.Leu367Pro)	Uncertain Significance	1	2	Domain-aggregate
PAH	NM_000277.2(PAH):c.529G>A (p.Val177Met)	Pathogenic	1	0	Domain-aggregate
PAH	NM_000277.2(PAH):c.865G>C (p.Gly289Arg)	Pathogenic	1	2	Domain-aggregate
PAH	NM_000277.2(PAH):c.820A>G (p.Lys274Glu)	Likely Benign	0	-1	Domain-aggregate
PAH	NM_000277.2(PAH):c.740G>A (p.Gly247Asp)	Uncertain Significance	1	2	Domain-aggregate
PAH	NM_000277.1(PAH):c.983C>T (p.Thr328Ile)	Uncertain Significance	1	2	Domain-aggregate
PAH	NM_000277.1(PAH):c.1208C>T (p.Ala403Val)	Pathogenic	0	0	Domain-aggregate
PAH	NM_000277.1(PAH):c.638T>C (p.Leu213Pro)	Pathogenic	1	2	Domain-aggregate
PAH	NM_000277.1(PAH):c.916A>G (p.Ile306Val)	Pathogenic	1	-1	Domain-aggregate
PAH	NM_000277.1(PAH):c.520A>G (p.Ile174Val)	Likely Pathogenic	1	-1	Domain-aggregate
PAH	NM_000277.2(PAH):c.650G>A (p.Cys217Tyr)	Uncertain Significance	1	2	Domain-aggregate
PAH	NM_000277.2(PAH):c.826A>G (p.Met276Val)	Likely Pathogenic	0	-1	Domain-aggregate
PAH	NM_000277.2(PAH):c.473G>A (p.Arg158Gln)	Pathogenic	1	2	Domain-aggregate
PAH	NM_000277.2(PAH):c.386A>G (p.Asp129Gly)	Likely Pathogenic	1	2	Domain-aggregate
PAH	NM_000277.2(PAH):c.770G>A (p.Gly257Asp)	Likely Pathogenic	4	2	Domain-aggregate
PAH	NM_000277.1(PAH):c.1184C>A (p.Ala395Asp)	Likely Pathogenic	1	2	Domain-aggregate
PAH	NM_000277.3(PAH):c.1156T>G (p.Tyr386Asp)	Likely Pathogenic	1	2	Domain-aggregate
PAH	NM_000277.3(PAH):c.617A>G (p.Tyr206Cys)	Likely Pathogenic	1	-1	Domain-aggregate
PAH	NM_000277.3(PAH):c.1003A>G (p.Lys335Glu)	Uncertain Significance	0	0	Domain-aggregate
PAH	NM_000277.3(PAH):c.329C>T (p.Ser110Leu)	Likely Pathogenic	0	-1	Domain-aggregate
PAH	NM_000277.2(PAH):c.997C>T (p.Leu333Phe)	Pathogenic	1	1	Domain-aggregate
PAH	NM_000277.2(PAH):c.746T>A (p.Leu249His)	Likely Pathogenic	1	2	Domain-aggregate
PAH	NM_000277.2(PAH):c.719T>C (p.Phe240Ser)	Likely Pathogenic	1	2	Domain-aggregate
PAH	NM_000277.1(PAH):c.1289T>C (p.Leu430Pro)	Likely Pathogenic	1	2	Domain-aggregate
PAH	NM_000277.1(PAH):c.689T>G (p.Val230Gly)	Uncertain Significance	1	1	Domain-aggregate
PAH	NM_000277.2(PAH):c.832A>G (p.Thr278Ala)	Likely Pathogenic	1	1	Domain-aggregate
PAH	NM_000277.1(PAH):c.653G>T (p.Gly218Val)	Pathogenic	1	0	Domain-aggregate
PAH	NM_000277.3(PAH):c.1074A>T (p.Leu358Phe)	Likely Pathogenic	1	-1	Domain-aggregate
PAH	NM_000277.1(PAH):c.1097C>A (p.Pro366His)	Likely Pathogenic	1	-1	Domain-aggregate
PAH	NM_000277.1(PAH):c.609C>G (p.Cys203Trp)	Likely Pathogenic	1	2	Domain-aggregate
PAH	NM_000277.3(PAH):c.1048T>A (p.Ser350Thr)	Likely Pathogenic	1	1	Domain-aggregate
PAH	NM_000277.3(PAH):c.1019T>C (p.Ile340Thr)	Uncertain Significance	0	-1	Domain-aggregate
PAH	NM_000277.3(PAH):c.463C>T (p.Arg155Cys)	Likely Pathogenic	1	0	Domain-aggregate
PAH	NM_000277.2(PAH):c.1196T>C (p.Val399Ala)	Likely Pathogenic	1	0	Domain-aggregate
PAH	NM_000277.3(PAH):c.1102G>A (p.Glu368Lys)	Likely Pathogenic	0	-1	Domain-aggregate
PAH	NM_000277.1(PAH):c.613G>A (p.Glu205Lys)	Likely Pathogenic	1	0	Domain-aggregate
PAH	NM_000277.2(PAH):c.662A>G (p.Glu221Gly)	Likely Pathogenic	1	-1	Domain-aggregate
PAH	NM_000277.3(PAH):c.1004A>C (p.Lys335Thr)	Uncertain Significance	1	0	Domain-aggregate
PAH	NM_000277.1(PAH):c.853C>T (p.His285Tyr)	Uncertain Significance	1	2	Domain-aggregate
PAH	NM_000277.3(PAH):c.523C>G (p.Pro175Ala)	Uncertain Significance	1	-1	Domain-aggregate
PAH	NM_000277.3(PAH):c.460T>C (p.Tyr154His)	Likely Pathogenic	1	2	Domain-aggregate
PAH	NM_000277.2(PAH):c.535T>A (p.Tyr179Asn)	Likely Pathogenic	1	2	Domain-aggregate
PAH	NM_000277.2(PAH):c.1033G>A (p.Ala345Thr)	Likely Pathogenic	1	2	Domain-aggregate
PAH	NM_000277.2(PAH):c.505C>T (p.Arg169Cys)	Likely Pathogenic	0	-1	Domain-aggregate
PAH	NM_000277.1(PAH):c.782G>C (p.Arg261Pro)	Pathogenic	1	2	Domain-aggregate
PAH	NM_000277.2(PAH):c.311C>A (p.Ala104Asp)	Pathogenic	0	2	Domain-aggregate
PAH	NM_000277.2(PAH):c.110T>C (p.Leu37Pro)	Likely Pathogenic	1	3	Domain-aggregate
PAH	NM_000277.2(PAH):c.856G>A (p.Glu286Lys)	Pathogenic	1	2	Domain-aggregate
PAH	NM_000277.2(PAH):c.434A>T (p.Asp145Val)	Likely Pathogenic	1	1	Domain-aggregate
PAH	NM_000277.2(PAH):c.194T>A (p.Ile65Asn)	Likely Pathogenic	1	4	Domain-aggregate
PAH	NM_000277.2(PAH):c.1271T>C (p.Leu424Ser)	Uncertain Significance	1	2	Domain-aggregate
PAH	NM_000277.2(PAH):c.812A>T (p.His271Leu)	Uncertain Significance	1	2	Domain-aggregate
PAH	NM_000277.2(PAH):c.745C>T (p.Leu249Phe)	Pathogenic	1	2	Domain-aggregate
PAH	NM_000277.2(PAH):c.829T>G (p.Tyr277Asp)	Pathogenic	1	2	Domain-aggregate
PAH	NM_000277.1(PAH):c.1243G>A (p.Asp415Asn)	Pathogenic	0	-1	Domain-aggregate
PAH	NM_000277.1(PAH):c.1223G>A (p.Arg408Gln)	Pathogenic	1	1	Domain-aggregate
PAH	NM_000277.1(PAH):c.1169A>G (p.Glu390Gly)	Pathogenic	1	-1	Domain-aggregate
PAH	NM_000277.1(PAH):c.754C>T (p.Arg252Trp)	Pathogenic	1	2	Domain-aggregate
PAH	NM_000277.1(PAH):c.508C>G (p.His170Asp)	Pathogenic	1	0	Domain-aggregate
PAH	NM_000277.2(PAH):c.199T>C (p.Ser67Pro)	Pathogenic	1	4	Domain-aggregate
PAH	NM_000277.3(PAH):c.824C>T (p.Pro275Leu)	Pathogenic	1	0	Domain-aggregate
PAH	NM_000277.2(PAH):c.193A>G (p.Ile65Val)	Pathogenic	1	0	Domain-aggregate
PAH	NM_000277.3(PAH):c.561G>C (p.Trp187Cys)	Likely Pathogenic	1	2	Domain-aggregate
PAH	NM_000277.1(PAH):c.155T>C (p.Leu52Ser)	Likely Pathogenic	1	4	Domain-aggregate
PAH	NM_000277.2(PAH):c.699C>A (p.Phe233Leu)	Pathogenic	1	2	Domain-aggregate
PAH	NM_000277.1(PAH):c.1180G>C (p.Asp394His)	Likely Pathogenic	1	-1	Domain-aggregate
PAH	NM_000277.2(PAH):c.1030G>A (p.Gly344Ser)	Likely Pathogenic	1	2	Domain-aggregate
PAH	NM_000277.3(PAH):c.117C>G (p.Phe39Leu)	Pathogenic	0	3	Domain-aggregate
PAH	NM_000277.1(PAH):c.728G>T (p.Arg243Leu)	Likely Pathogenic	1	2	Domain-aggregate
PAH	NM_000277.3(PAH):c.1252A>C (p.Thr418Pro)	Pathogenic	1	1	Domain-aggregate
PAH	NM_000277.3(PAH):c.1022A>G (p.Lys341Arg)	Uncertain Significance	0	-2	Domain-aggregate
PAH	NM_000277.3(PAH):c.1066T>C (p.Tyr356His)	Uncertain Significance	0	-1	Domain-aggregate
PAH	NM_000277.2(PAH):c.506G>C (p.Arg169Pro)	Uncertain Significance	1	2	Domain-aggregate
PAH	NM_000277.3(PAH):c.869A>T (p.His290Leu)	Uncertain Significance	1	2	Domain-aggregate
PAH	NM_000277.3(PAH):c.869A>G (p.His290Arg)	Uncertain Significance	1	2	Domain-aggregate
PAH	NM_000277.2(PAH):c.1220C>T (p.Pro407Leu)	Likely Pathogenic	0	0	Domain-aggregate
PAH	NM_000277.3(PAH):c.320A>G (p.His107Arg)	Pathogenic	0	-1	Domain-aggregate
PAH	NM_000277.2(PAH):c.545A>G (p.Glu182Gly)	Likely Pathogenic	1	-1	Domain-aggregate
PAH	NM_000277.3(PAH):c.204A>T (p.Arg68Ser)	Pathogenic	1	3	Domain-aggregate
PAH	NM_000277.1(PAH):c.1180G>T (p.Asp394Tyr)	Likely Pathogenic	1	0	Domain-aggregate
PAH	NM_000277.2(PAH):c.682G>A (p.Glu228Lys)	Uncertain Significance	1	-1	Domain-aggregate
PAH	NM_000277.3(PAH):c.1027T>G (p.Tyr343Asp)	Likely Pathogenic	1	2	Domain-aggregate
PAH	NM_000277.3(PAH):c.1132A>T (p.Thr378Ser)	Uncertain Significance	-1	-1	Domain-aggregate
PAH	NM_000277.2(PAH):c.301G>A (p.Asp101Asn)	Likely Pathogenic	0	-3	Domain-aggregate
PAH	NM_000277.3(PAH):c.1264G>A (p.Glu422Lys)	Uncertain Significance	1	0	Domain-aggregate
PAH	NM_000277.2(PAH):c.473G>C (p.Arg158Pro)	Uncertain Significance	1	2	Domain-aggregate
PAH	NM_000277.2(PAH):c.386A>T (p.Asp129Val)	Uncertain Significance	1	2	Domain-aggregate
PAH	NM_000277.2(PAH):c.757G>A (p.Asp253Asn)	Uncertain Significance	1	2	Domain-aggregate
PAH	NM_000277.3(PAH):c.460T>A (p.Tyr154Asn)	Uncertain Significance	1	2	Domain-aggregate
PAH	NM_000277.2(PAH):c.637C>T (p.Leu213Phe)	Uncertain Significance	1	0	Domain-aggregate
PAH	NM_000277.2(PAH):c.559T>C (p.Trp187Arg)	Likely Pathogenic	1	2	Domain-aggregate
PAH	NM_000277.2(PAH):c.493G>A (p.Ala165Thr)	Likely Pathogenic	1	2	Domain-aggregate
PAH	NM_000277.2(PAH):c.493G>C (p.Ala165Pro)	Uncertain Significance	1	2	Domain-aggregate
PAH	NM_000277.2(PAH):c.581T>C (p.Leu194Pro)	Likely Pathogenic	1	2	Domain-aggregate
PAH	NM_000277.2(PAH):c.355C>T (p.Pro119Ser)	Likely Pathogenic	1	1	Domain-aggregate
PAH	NM_000277.2(PAH):c.299A>G (p.His100Arg)	Uncertain Significance	-1	-4	Domain-aggregate
PAH	NM_000277.2(PAH):c.811C>T (p.His271Tyr)	Uncertain Significance	1	1	Domain-aggregate
PAH	NM_000277.2(PAH):c.739G>C (p.Gly247Arg)	Likely Pathogenic	1	2	Domain-aggregate
PAH	NM_000277.2(PAH):c.739G>A (p.Gly247Ser)	Likely Pathogenic	1	2	Domain-aggregate
PAH	NM_000277.2(PAH):c.907T>C (p.Ser303Pro)	Likely Pathogenic	1	2	Domain-aggregate
PAH	NM_000277.2(PAH):c.46T>C (p.Ser16Pro)	Uncertain Significance	-1	-3	Domain-aggregate
PAH	NM_000277.1(PAH):c.721C>T (p.Arg241Cys)	Pathogenic	1	-1	Domain-aggregate
PAH	NM_000277.1(PAH):c.898G>T (p.Ala300Ser)	Pathogenic	1	-1	Domain-aggregate
PAH	NM_000277.1(PAH):c.755G>A (p.Arg252Gln)	Pathogenic	1	2	Domain-aggregate
PAH	NM_000277.2(PAH):c.802T>C (p.Tyr268His)	Uncertain Significance	1	2	Domain-aggregate
PAH	NM_000277.2(PAH):c.827T>A (p.Met276Lys)	Likely Pathogenic	0	-1	Domain-aggregate
PAH	NM_000277.2(PAH):c.789C>G (p.Phe263Leu)	Uncertain Significance	1	2	Domain-aggregate
PAH	NM_000277.2(PAH):c.791A>T (p.His264Leu)	Uncertain Significance	1	1	Domain-aggregate
PAH	NM_000277.2(PAH):c.181A>G (p.Asn61Asp)	Likely Pathogenic	1	0	Domain-aggregate
PAH	NM_000277.3(PAH):c.1229T>C (p.Phe410Ser)	Pathogenic	4	2	Domain-aggregate
PAH	NM_000277.1(PAH):c.1183G>C (p.Ala395Pro)	Pathogenic	4	2	Domain-aggregate
PAH	NM_000277.1(PAH):c.716G>A (p.Gly239Asp)	Pathogenic	4	2	Domain-aggregate
SLC26A4	NM_000441.2(SLC26A4):c.554G>C (p.Arg185Thr)	Likely Pathogenic	1	2	Domain-aggregate
SLC26A4	NM_000441.2(SLC26A4):c.1694G>A (p.Cys565Tyr)	Likely Pathogenic	0	0	Domain-aggregate
SLC26A4	NM_000441.2(SLC26A4):c.200C>G (p.Thr67Ser)	Likely Benign	-1	-3	Domain-aggregate
SLC26A4	NM_000441.2(SLC26A4):c.1061T>C (p.Phe354Ser)	Likely Benign	0	0	Domain-aggregate
SLC26A4	NM_000441.2(SLC26A4):c.2145G>T (p.Lys715Asn)	Likely Pathogenic	0	0	Domain-aggregate
SLC26A4	NM_000441.2(SLC26A4):c.147C>G (p.Ser49Arg)	Likely Benign	-1	-3	Domain-aggregate
SLC26A4	NM_000441.2(SLC26A4):c.1924T>C (p.Ser642Pro)	Uncertain Significance	1	1	Domain-aggregate
SLC26A4	NM_000441.1(SLC26A4):c.1363A>T (p.Ile455Phe)	Benign	1	0	Domain-aggregate
SLC26A4	NM_000441.2(SLC26A4):c.845G>A (p.Cys282Tyr)	Likely Pathogenic	1	2	Domain-aggregate
SLC26A4	NM_000441.2(SLC26A4):c.1204G>A (p.Val402Met)	Pathogenic	1	0	Domain-aggregate
SLC26A4	NM_000441.1(SLC26A4):c.1069G>A (p.Ala357Thr)	Likely Benign	1	0	Domain-aggregate
SLC26A4	NM_000441.2(SLC26A4):c.1708G>A (p.Val570Ile)	Likely Pathogenic	1	-1	Domain-aggregate
SLC26A4	NM_000441.1(SLC26A4):c.565G>T (p.Ala189Ser)	Benign	0	-4	Domain-aggregate
SLC26A4	NM_000441.1(SLC26A4):c.1229C>T (p.Thr410Met)	Pathogenic	1	2	Domain-aggregate
RAG1	NM_000448.3(RAG1):c.17C>T (p.Pro6Leu)	Uncertain Significance	0	-3	Domain-aggregate
RAG1	NM_000448.3(RAG1):c.82T>C (p.Trp28Arg)	Uncertain Significance	0	3	Domain-aggregate
RAG1	NM_000448.3(RAG1):c.1573C>T (p.Pro525Ser)	Benign	0	-2	Domain-aggregate
RAG1	NM_000448.3(RAG1):c.527G>T (p.Cys176Phe)	Uncertain Significance	0	3	Domain-aggregate
RAG1	NM_000448.3(RAG1):c.2095C>T (p.Arg699Trp)	Likely Pathogenic	0	1	Domain-aggregate
RAG1	NM_000448.3(RAG1):c.40G>A (p.Ala14Thr)	Uncertain Significance	0	-3	Domain-aggregate
RAG1	NM_000448.3(RAG1):c.1088G>A (p.Cys363Tyr)	Uncertain Significance	0	2	Domain-aggregate
RAG1	NM_000448.3(RAG1):c.2442G>T (p.Glu814Asp)	Uncertain Significance	0	2	Domain-aggregate
RAG1	NM_000448.3(RAG1):c.2904C>A (p.Asn968Lys)	Uncertain Significance	0	2	Domain-aggregate
RAG1	NM_000448.3(RAG1):c.15C>G (p.Phe5Leu)	Uncertain Significance	0	-1	Domain-aggregate
RAG1	NM_000448.3(RAG1):c.2291G>A (p.Arg764His)	Uncertain Significance	0	0	Domain-aggregate
RAG1	NM_000448.3(RAG1):c.2603C>T (p.Ala868Val)	Uncertain Significance	0	-2	Domain-aggregate
RAG1	NM_000448.3(RAG1):c.725A>G (p.Gln242Arg)	Likely Benign	0	-4	Domain-aggregate
RAG1	NM_000448.3(RAG1):c.906C>A (p.Asp302Glu)	Benign	0	0	Domain-aggregate
RAG1	NM_000448.3(RAG1):c.1331C>T (p.Ala444Val)	Pathogenic	0	0	Domain-aggregate
RAG1	NM_000448.3(RAG1):c.29G>T (p.Gly10Val)	Uncertain Significance	0	-2	Domain-aggregate
RAG1	NM_000448.3(RAG1):c.86A>G (p.Lys29Arg)	Uncertain Significance	0	0	Domain-aggregate
RAG1	NM_000448.3(RAG1):c.486T>A (p.Asp162Glu)	Likely Benign	0	1	Domain-aggregate
RAG1	NM_000448.3(RAG1):c.251A>G (p.His84Arg)	Benign	0	-2	Domain-aggregate
RAG1	NM_000448.3(RAG1):c.2638G>A (p.Glu880Lys)	Benign	0	-3	Domain-aggregate
RAG1	NM_000448.3(RAG1):c.2690G>A (p.Arg897Gln)	Uncertain Significance	0	2	Domain-aggregate
RAG1	NM_000448.3(RAG1):c.76T>C (p.Ser26Pro)	Uncertain Significance	0	-1	Domain-aggregate
RAG1	NM_000448.3(RAG1):c.577G>A (p.Glu193Lys)	Benign	0	-2	Domain-aggregate
IL7R	NM_002185.5(IL7R):c.662G>T (p.Ser221Ile)	Pathogenic	0	3	Domain-aggregate
IL7R	NM_002185.5(IL7R):c.212T>C (p.Phe71Ser)	Uncertain Significance	0	2	Domain-aggregate
IL7R	NM_002185.5(IL7R):c.135G>C (p.Gln45His)	Uncertain Significance	0	1	Domain-aggregate
IL7R	NM_002185.5(IL7R):c.41T>C (p.Leu14Ser)	Uncertain Significance	0	0	Domain-aggregate
IL7R	NM_002185.5(IL7R):c.1241C>T (p.Thr414Met)	Benign	0	-3	Domain-aggregate
IL7R	NM_002185.5(IL7R):c.353G>A (p.Cys118Tyr)	Pathogenic	0	2	Domain-aggregate
IL7R	NM_002185.5(IL7R):c.314G>A (p.Ser105Asn)	Likely Benign	0	0	Domain-aggregate
IL7R	NM_002185.5(IL7R):c.339A>C (p.Glu113Asp)	Likely Benign	0	-2	Domain-aggregate
IL7R	NM_002185.5(IL7R):c.1092T>G (p.Asp364Glu)	Benign	0	-3	Domain-aggregate
IL7R	NM_002185.5(IL7R):c.553A>T (p.Ser185Cys)	Uncertain Significance	0	-1	Domain-aggregate
IL7R	NM_002185.5(IL7R):c.707G>A (p.Gly236Glu)	Uncertain Significance	0	-3	Domain-aggregate
IL7R	NM_002185.5(IL7R):c.205C>G (p.Leu69Val)	Uncertain Significance	0	-3	Domain-aggregate
IL7R	NM_002185.5(IL7R):c.1231A>G (p.Thr411Ala)	Likely Benign	0	-3	Domain-aggregate
IL7R	NM_002185.5(IL7R):c.778G>A (p.Ala260Thr)	Likely Benign	0	-2	Domain-aggregate
IL7R	NM_002185.5(IL7R):c.602A>G (p.Tyr201Cys)	Likely Benign	0	2	Domain-aggregate
IL7R	NM_002185.5(IL7R):c.394C>T (p.Pro132Ser)	Likely Pathogenic	0	2	Domain-aggregate
IL7R	NM_002185.5(IL7R):c.152C>T (p.Ser51Leu)	Likely Benign	0	-2	Domain-aggregate
IL7R	NM_002185.5(IL7R):c.554G>T (p.Ser185Ile)	Uncertain Significance	0	-2	Domain-aggregate
SOS2	NM_006939.4(SOS2):c.800T>A (p.Met267Lys)	Likely Pathogenic	1	2	Domain-aggregate
SOS2	NM_006939.4(SOS2):c.3235A>G (p.Thr1079Ala)	Uncertain Significance	-1	-4	Domain-aggregate
SOS2	NM_006939.4(SOS2):c.2600A>G (p.Asn867Ser)	Likely Benign	-1	-2	Domain-aggregate
SOS2	NM_006939.4(SOS2):c.2957G>A (p.Arg986Lys)	Uncertain Significance	-1	-2	Domain-aggregate
SOS2	NM_006939.4(SOS2):c.3584C>T (p.Ala1195Val)	Uncertain Significance	-1	-4	Domain-aggregate
SLC9A6	NM_001042537.1(SLC9A6):c.25G>T (p.Ala9Ser)	Benign	-1	-3	Domain-aggregate
SLC9A6	NM_001042537.1(SLC9A6):c.171C>G (p.Ile57Met)	Likely Benign	-1	-2	Domain-aggregate
SLC9A6	NM_001042537.1(SLC9A6):c.137G>A (p.Gly46Asp)	Uncertain Significance	-1	-3	Domain-aggregate
SLC9A6	NM_001042537.1(SLC9A6):c.148G>T (p.Ala50Ser)	Likely Benign	-1	-3	Domain-aggregate
PPP1CB	NM_002709.3(PPP1CB):c.166G>C (p.Ala56Pro)	Likely Pathogenic	0	2	Domain-aggregate
PPP1CB	NM_002709.3(PPP1CB):c.146C>G (p.Pro49Arg)	Pathogenic	0	1	Domain-aggregate
PPP1CB	NM_002709.3(PPP1CB):c.820G>A (p.Glu274Lys)	Likely Pathogenic	0	4	Domain-aggregate
PPP1CB	NM_002709.3(PPP1CB):c.548A>C (p.Glu183Ala)	Pathogenic	-1	0	Domain-aggregate
VWF	NM_000552.5(VWF):c.4837T>C (p.Ser1613Pro)	Uncertain Significance	1	1	Domain-aggregate
VWF	NM_000552.5(VWF):c.2384A>G (p.Tyr795Cys)	Pathogenic	1	0	Domain-aggregate
VWF	NM_000552.5(VWF):c.2278C>T (p.Arg760Cys)	Likely Pathogenic	-1	0	Domain-aggregate
VWF	NM_000552.5(VWF):c.4241T>G (p.Val1414Gly)	Uncertain Significance	1	1	Domain-aggregate
VWF	NM_000552.5(VWF):c.4883T>C (p.Ile1628Thr)	Pathogenic	1	1	Domain-aggregate
VWF	NM_000552.5(VWF):c.6553C>T (p.Arg2185Trp)	Uncertain Significance	1	0	Domain-aggregate
VWF	NM_000552.5(VWF):c.6859C>T (p.Arg2287Trp)	Uncertain Significance	0	-1	Domain-aggregate
VWF	NM_000552.5(VWF):c.3941T>A (p.Val1314Asp)	Pathogenic	1	2	Domain-aggregate
VWF	NM_000552.4(VWF):c.3970G>A (p.Gly1324Ser)	Pathogenic	1	-1	Domain-aggregate
VWF	NM_000552.5(VWF):c.3940G>C (p.Val1314Leu)	Pathogenic	0	0	Domain-aggregate
VWF	NM_000552.5(VWF):c.2220G>A (p.Met740Ile)	Benign	-1	-1	Domain-aggregate
VWF	NM_000552.5(VWF):c.3692A>C (p.Asn1231Thr)	Likely Benign	-1	-3	Domain-aggregate
VWF	NM_000552.5(VWF):c.3944G>A (p.Arg1315His)	Likely Pathogenic	1	0	Domain-aggregate
VWF	NM_000552.5(VWF):c.4748G>A (p.Arg1583Gln)	Likely Benign	-1	-3	Domain-aggregate
VWF	NM_000552.5(VWF):c.4138A>G (p.Ile1380Val)	Benign	-1	-1	Domain-aggregate
VWF	NM_000552.4(VWF):c.3922C>T (p.Arg1308Cys)	Pathogenic	1	0	Domain-aggregate
VWF	NM_000552.4(VWF):c.3437A>G (p.Tyr1146Cys)	Pathogenic	1	3	Domain-aggregate
VWF	NM_000552.5(VWF):c.4244G>A (p.Gly1415Asp)	Likely Pathogenic	1	2	Domain-aggregate
VWF	NM_000552.5(VWF):c.4693G>T (p.Val1565Leu)	Benign	-1	-1	Domain-aggregate
VWF	NM_000552.5(VWF):c.8317T>C (p.Cys2773Arg)	Pathogenic	1	3	Domain-aggregate
VWF	NM_000552.5(VWF):c.5235G>T (p.Trp1745Cys)	Likely Pathogenic	1	2	Domain-aggregate
VWF	NM_000552.5(VWF):c.4105T>A (p.Phe1369Ile)	Pathogenic	1	1	Domain-aggregate
VWF	NM_000552.4(VWF):c.1583A>G (p.Asn528Ser)	Pathogenic	0	0	Domain-aggregate
VWF	NM_000552.5(VWF):c.3971G>C (p.Gly1324Ala)	Pathogenic	1	0	Domain-aggregate
VWF	NM_000552.5(VWF):c.3940G>T (p.Val1314Phe)	Pathogenic	1	0	Domain-aggregate
VWF	NM_000552.5(VWF):c.8318G>C (p.Cys2773Ser)	Pathogenic	1	3	Domain-aggregate
VWF	NM_000552.5(VWF):c.1728G>T (p.Met576Ile)	Likely Benign	-1	0	Domain-aggregate
VWF	NM_000552.5(VWF):c.3686T>G (p.Val1229Gly)	Likely Benign	-1	-4	Domain-aggregate
VWF	NM_000552.5(VWF):c.3788C>T (p.Ser1263Leu)	Uncertain Significance	-1	-4	Domain-aggregate
VWF	NM_000552.5(VWF):c.3802C>G (p.His1268Asp)	Pathogenic	-1	-2	Domain-aggregate
VWF	NM_000552.5(VWF):c.4304A>G (p.Asn1435Ser)	Benign	0	0	Domain-aggregate
VWF	NM_000552.5(VWF):c.3946G>A (p.Val1316Met)	Pathogenic	1	0	Domain-aggregate
VWF	NM_000552.4(VWF):c.4022G>A (p.Arg1341Gln)	Pathogenic	1	0	Domain-aggregate
VWF	NM_000552.5(VWF):c.4195C>T (p.Arg1399Cys)	Likely Pathogenic	1	0	Domain-aggregate
VWF	NM_000552.5(VWF):c.4399C>T (p.Pro1467Ser)	Uncertain Significance	0	-3	Domain-aggregate
VWF	NM_000552.4(VWF):c.3929C>T (p.Ser1310Phe)	Likely Pathogenic	1	1	Domain-aggregate
VWF	NM_000552.5(VWF):c.2411G>T (p.Cys804Phe)	Likely Pathogenic	1	1	Domain-aggregate
VWF	NM_000552.5(VWF):c.3178T>C (p.Cys1060Arg)	Pathogenic	1	3	Domain-aggregate
VWF	NM_000552.5(VWF):c.3515G>T (p.Gly1172Val)	Uncertain Significance	1	3	Domain-aggregate
VWF	NM_000552.5(VWF):c.3925A>G (p.Ile1309Val)	Pathogenic	1	0	Domain-aggregate
VWF	NM_000552.5(VWF):c.3854C>T (p.Ser1285Phe)	Likely Pathogenic	1	2	Domain-aggregate
VWF	NM_000552.4(VWF):c.4789C>T (p.Arg1597Trp)	Pathogenic	1	0	Domain-aggregate
VWF	NM_000552.5(VWF):c.5173C>T (p.Pro1725Ser)	Likely Benign	0	-1	Domain-aggregate
VWF	NM_000552.5(VWF):c.2561G>A (p.Arg854Gln)	Pathogenic	0	-2	Domain-aggregate
VWF	NM_000552.4(VWF):c.3916C>T (p.Arg1306Trp)	Pathogenic	1	0	Domain-aggregate
VWF	NM_000552.5(VWF):c.391G>A (p.Gly131Ser)	Likely Benign	-1	-3	Domain-aggregate
VWF	NM_000552.5(VWF):c.4121G>A (p.Arg1374His)	Pathogenic	1	0	Domain-aggregate
VWF	NM_000552.5(VWF):c.2635G>A (p.Asp879Asn)	Pathogenic	1	2	Domain-aggregate
VWF	NM_000552.5(VWF):c.7997C>T (p.Thr2666Met)	Likely Benign	-1	-3	Domain-aggregate
VWF	NM_000552.4(VWF):c.2372C>T (p.Thr791Met)	Pathogenic	1	0	Domain-aggregate
VWF	NM_000552.5(VWF):c.2446C>T (p.Arg816Trp)	Pathogenic	1	-1	Domain-aggregate
VWF	NM_000552.4(VWF):c.2435C>T (p.Pro812Leu)	Uncertain Significance	1	-1	Domain-aggregate
VWF	NM_000552.5(VWF):c.2510C>A (p.Ala837Asp)	Likely Benign	-1	-1	Domain-aggregate
VWF	NM_000552.5(VWF):c.2900G>A (p.Gly967Asp)	Likely Benign	0	-2	Domain-aggregate
VWF	NM_000552.5(VWF):c.3485C>T (p.Pro1162Leu)	Benign	1	-2	Domain-aggregate
VWF	NM_000552.5(VWF):c.4130C>T (p.Ala1377Val)	Uncertain Significance	1	0	Domain-aggregate
VWF	NM_000552.5(VWF):c.3445T>C (p.Cys1149Arg)	Pathogenic	1	3	Domain-aggregate
VWF	NM_000552.5(VWF):c.4885G>A (p.Gly1629Arg)	Pathogenic	1	2	Domain-aggregate
VWF	NM_000552.5(VWF):c.3569G>A (p.Cys1190Tyr)	Pathogenic	1	3	Domain-aggregate
VWF	NM_000552.5(VWF):c.4885G>C (p.Gly1629Arg)	Pathogenic	1	2	Domain-aggregate
VWF	NM_000552.5(VWF):c.3568T>C (p.Cys1190Arg)	Pathogenic	1	3	Domain-aggregate
VWF	NM_000552.5(VWF):c.3939G>C (p.Trp1313Cys)	Likely Pathogenic	0	0	Domain-aggregate
VWF	NM_000552.5(VWF):c.3569G>T (p.Cys1190Phe)	Likely Pathogenic	1	3	Domain-aggregate
VWF	NM_000552.5(VWF):c.3926T>A (p.Ile1309Asn)	Likely Pathogenic	1	1	Domain-aggregate
VWF	NM_000552.5(VWF):c.3944G>T (p.Arg1315Leu)	Likely Pathogenic	1	1	Domain-aggregate
VWF	NM_000552.5(VWF):c.4276C>A (p.Arg1426Ser)	Uncertain Significance	0	0	Domain-aggregate
VWF	NM_000552.5(VWF):c.3797C>A (p.Pro1266Gln)	Uncertain Significance	0	-3	Domain-aggregate
RPE65	NM_000329.3(RPE65):c.124C>T (p.Leu42Phe)	Likely Pathogenic	2	-1	Domain-aggregate
RPE65	NM_000329.3(RPE65):c.484A>C (p.Thr162Pro)	Likely Pathogenic	2	1	Domain-aggregate
RPE65	NM_000329.3(RPE65):c.302C>T (p.Thr101Ile)	Likely Pathogenic	2	3	Domain-aggregate
RPE65	NM_000329.3(RPE65):c.329A>G (p.Asp110Gly)	Pathogenic	2	3	Domain-aggregate
RPE65	NM_000329.3(RPE65):c.845A>G (p.Asn282Ser)	Uncertain Significance	0	-2	Domain-aggregate
RPE65	NM_000329.3(RPE65):c.881A>C (p.Lys294Thr)	Likely Benign	2	2	Domain-aggregate
RPE65	NM_000329.3(RPE65):c.1103A>G (p.Tyr368Cys)	Likely Pathogenic	2	2	Domain-aggregate
RPE65	NM_000329.3(RPE65):c.200T>G (p.Leu67Arg)	Pathogenic	2	3	Domain-aggregate
RPE65	NM_000329.3(RPE65):c.975T>G (p.Ile325Met)	Uncertain Significance	0	-2	Domain-aggregate
RPE65	NM_000329.3(RPE65):c.65T>C (p.Leu22Pro)	Likely Pathogenic	1	2	Domain-aggregate
RPE65	NM_000329.3(RPE65):c.1597T>A (p.Ser533Thr)	Uncertain Significance	0	-3	Domain-aggregate
RPE65	NM_000329.3(RPE65):c.982C>T (p.Leu328Phe)	Likely Pathogenic	1	0	Domain-aggregate
RPE65	NM_000329.3(RPE65):c.917C>T (p.Thr306Ile)	Likely Pathogenic	2	2	Domain-aggregate
RPE65	NM_000329.3(RPE65):c.430T>G (p.Tyr144Asp)	Likely Pathogenic	2	3	Domain-aggregate
RPE65	NM_000329.3(RPE65):c.242G>T (p.Arg81Ile)	Pathogenic	2	3	Domain-aggregate
RPE65	NM_000329.3(RPE65):c.545A>G (p.His182Arg)	Pathogenic	2	2	Domain-aggregate
RPE65	NM_000329.3(RPE65):c.74C>T (p.Pro25Leu)	Pathogenic	2	-1	Domain-aggregate
RPE65	NM_000329.3(RPE65):c.755T>C (p.Phe252Ser)	Likely Pathogenic	2	3	Domain-aggregate
RPE65	NM_000329.3(RPE65):c.938A>G (p.His313Arg)	Pathogenic	2	3	Domain-aggregate
RPE65	NM_000329.3(RPE65):c.1102T>C (p.Tyr368His)	Pathogenic	2	3	Domain-aggregate
RPE65	NM_000329.3(RPE65):c.1543C>T (p.Arg515Trp)	Pathogenic	2	1	Domain-aggregate
RPE65	NM_000329.3(RPE65):c.1244C>T (p.Ala415Val)	Likely Pathogenic	2	2	Domain-aggregate
RPE65	NM_000329.3(RPE65):c.394G>A (p.Ala132Thr)	Benign	0	-2	Domain-aggregate
RPE65	NM_000329.3(RPE65):c.1040G>A (p.Arg347His)	Likely Pathogenic	0	-1	Domain-aggregate
RPE65	NM_000329.3(RPE65):c.1399C>T (p.Pro467Ser)	Pathogenic	2	2	Domain-aggregate
RPE65	NM_000329.3(RPE65):c.314C>A (p.Thr105Asn)	Uncertain Significance	2	2	Domain-aggregate
RPE65	NM_000329.3(RPE65):c.565G>A (p.Val189Ile)	Uncertain Significance	0	-3	Domain-aggregate
RPE65	NM_000329.3(RPE65):c.419G>A (p.Gly140Glu)	Likely Pathogenic	2	2	Domain-aggregate
RPE65	NM_000329.3(RPE65):c.331C>A (p.Pro111Thr)	Likely Pathogenic	2	2	Domain-aggregate
RPE65	NM_000329.3(RPE65):c.1292A>G (p.Tyr431Cys)	Likely Pathogenic	2	1	Domain-aggregate
RPE65	NM_000329.3(RPE65):c.1087C>A (p.Pro363Thr)	Pathogenic	1	2	Domain-aggregate
RPE65	NM_000329.3(RPE65):c.1078G>C (p.Ala360Pro)	Likely Pathogenic	1	2	Domain-aggregate
RPE65	NM_000329.3(RPE65):c.235T>C (p.Tyr79His)	Likely Pathogenic	2	3	Domain-aggregate
RPE65	NM_000329.3(RPE65):c.1355T>G (p.Val452Gly)	Likely Pathogenic	2	0	Domain-aggregate
RPE65	NM_000329.3(RPE65):c.1580A>G (p.His527Arg)	Pathogenic	2	3	Domain-aggregate
RPE65	NM_000329.3(RPE65):c.499G>T (p.Asp167Tyr)	Pathogenic	2	2	Domain-aggregate
RPE65	NM_000329.3(RPE65):c.1328T>C (p.Val443Ala)	Likely Pathogenic	2	2	Domain-aggregate
RPE65	NM_000329.3(RPE65):c.1078G>A (p.Ala360Thr)	Uncertain Significance	0	0	Domain-aggregate
RPE65	NM_000329.3(RPE65):c.118G>A (p.Gly40Ser)	Pathogenic	2	2	Domain-aggregate
RPE65	NM_000329.3(RPE65):c.1301C>A (p.Ala434Glu)	Likely Pathogenic	1	3	Domain-aggregate
RPE65	NM_000329.3(RPE65):c.544C>T (p.His182Tyr)	Pathogenic	2	0	Domain-aggregate
RPE65	NM_000329.3(RPE65):c.675C>G (p.Ile225Met)	Likely Benign	0	-2	Domain-aggregate
RPE65	NM_000329.3(RPE65):c.902A>G (p.Asn301Ser)	Uncertain Significance	0	-3	Domain-aggregate
RPE65	NM_000329.3(RPE65):c.331C>T (p.Pro111Ser)	Pathogenic	2	3	Domain-aggregate
RPE65	NM_000329.3(RPE65):c.1399C>G (p.Pro467Ala)	Pathogenic	2	0	Domain-aggregate
RPE65	NM_000329.3(RPE65):c.143G>A (p.Gly48Glu)	Likely Pathogenic	2	3	Domain-aggregate
RPE65	NM_000329.3(RPE65):c.1418T>A (p.Val473Asp)	Likely Pathogenic	2	3	Domain-aggregate
RPE65	NM_000329.3(RPE65):c.963T>G (p.Asn321Lys)	Benign	-1	-2	Domain-aggregate
RPE65	NM_000329.3(RPE65):c.859G>T (p.Val287Phe)	Likely Pathogenic	2	2	Domain-aggregate
RPE65	NM_000329.3(RPE65):c.1022T>C (p.Leu341Ser)	Pathogenic	2	3	Domain-aggregate
RPE65	NM_000329.3(RPE65):c.560G>A (p.Gly187Glu)	Pathogenic	2	1	Domain-aggregate
RPE65	NM_000329.3(RPE65):c.257C>A (p.Thr86Asn)	Uncertain Significance	0	2	Domain-aggregate
RPE65	NM_000329.3(RPE65):c.295G>A (p.Val99Ile)	Likely Benign	0	-2	Domain-aggregate
RPE65	NM_000329.3(RPE65):c.536C>T (p.Ala179Val)	Likely Pathogenic	2	3	Domain-aggregate
RPE65	NM_000329.3(RPE65):c.1301C>T (p.Ala434Val)	Benign	0	-2	Domain-aggregate
RPE65	NM_000329.3(RPE65):c.515T>A (p.Val172Asp)	Likely Pathogenic	2	3	Domain-aggregate
RPE65	NM_000329.3(RPE65):c.1583G>T (p.Gly528Val)	Likely Pathogenic	2	3	Domain-aggregate
RPE65	NM_000329.3(RPE65):c.310G>C (p.Gly104Arg)	Likely Pathogenic	2	3	Domain-aggregate
RPE65	NM_000329.3(RPE65):c.1590C>A (p.Phe530Leu)	Likely Pathogenic	2	3	Domain-aggregate
RPE65	NM_000329.3(RPE65):c.272G>C (p.Arg91Pro)	Likely Pathogenic	1	3	Domain-aggregate
RPE65	NM_000329.3(RPE65):c.444G>T (p.Glu148Asp)	Likely Pathogenic	1	3	Domain-aggregate
RPE65	NM_000329.3(RPE65):c.131G>A (p.Arg44Gln)	Pathogenic	2	2	Domain-aggregate
RPE65	NM_000329.3(RPE65):c.989G>A (p.Cys330Tyr)	Likely Pathogenic	1	2	Domain-aggregate
RPE65	NM_000329.3(RPE65):c.311G>T (p.Gly104Val)	Likely Pathogenic	2	3	Domain-aggregate
RPE65	NM_000329.3(RPE65):c.202C>T (p.His68Tyr)	Pathogenic	2	2	Domain-aggregate
RPE65	NM_000329.3(RPE65):c.770T>G (p.Val257Gly)	Likely Pathogenic	2	2	Domain-aggregate
RPE65	NM_000329.3(RPE65):c.1579C>T (p.His527Tyr)	Pathogenic	2	3	Domain-aggregate
RPE65	NM_000329.3(RPE65):c.311G>A (p.Gly104Asp)	Likely Pathogenic	2	3	Domain-aggregate
RPE65	NM_000329.3(RPE65):c.571A>G (p.Asn191Asp)	Likely Pathogenic	2	2	Domain-aggregate
DCLRE1C	NM_001033855.3(DCLRE1C):c.587G>A (p.Arg196Gln)	Uncertain Significance	0	-3	Domain-aggregate
DCLRE1C	NM_001033855.3(DCLRE1C):c.586C>T (p.Arg196Trp)	Uncertain Significance	0	-1	Domain-aggregate
DCLRE1C	NM_001033855.3(DCLRE1C):c.554G>A (p.Gly185Glu)	Uncertain Significance	0	2	Domain-aggregate
DCLRE1C	NM_001033855.3(DCLRE1C):c.50A>G (p.Asp17Gly)	Uncertain Significance	0	4	Domain-aggregate
DCLRE1C	NM_001033855.3(DCLRE1C):c.1991G>A (p.Arg664Gln)	Uncertain Significance	0	-4	Domain-aggregate
DCLRE1C	NM_001033855.3(DCLRE1C):c.556G>C (p.Val186Leu)	Likely Benign	0	-1	Domain-aggregate
DCLRE1C	NM_001033855.3(DCLRE1C):c.97C>T (p.His33Tyr)	Uncertain Significance	0	2	Domain-aggregate
DCLRE1C	NM_001033855.3(DCLRE1C):c.281C>A (p.Ser94Tyr)	Uncertain Significance	0	-2	Domain-aggregate
DCLRE1C	NM_001033855.3(DCLRE1C):c.245T>C (p.Ile82Thr)	Uncertain Significance	0	0	Domain-aggregate
DCLRE1C	NM_001033855.3(DCLRE1C):c.95C>T (p.Ser32Phe)	Likely Pathogenic	0	2	Domain-aggregate
DCLRE1C	NM_001033855.3(DCLRE1C):c.53G>A (p.Arg18His)	Uncertain Significance	0	1	Domain-aggregate
DCLRE1C	NM_001033855.3(DCLRE1C):c.47T>C (p.Ile16Thr)	Likely Pathogenic	0	2	Domain-aggregate
DCLRE1C	NM_001033855.3(DCLRE1C):c.564G>T (p.Glu188Asp)	Uncertain Significance	0	-1	Domain-aggregate
DCLRE1C	NM_001033855.3(DCLRE1C):c.470A>C (p.Lys157Thr)	Uncertain Significance	0	0	Domain-aggregate
DCLRE1C	NM_001033855.3(DCLRE1C):c.17G>A (p.Gly6Glu)	Uncertain Significance	0	4	Domain-aggregate
DCLRE1C	NM_001033855.3(DCLRE1C):c.106A>G (p.Lys36Glu)	Uncertain Significance	0	1	Domain-aggregate
DCLRE1C	NM_001033855.3(DCLRE1C):c.634T>A (p.Tyr212Asn)	Uncertain Significance	0	3	Domain-aggregate
DCLRE1C	NM_001033855.3(DCLRE1C):c.623C>T (p.Ala208Val)	Uncertain Significance	0	3	Domain-aggregate
DCLRE1C	NM_001033855.3(DCLRE1C):c.310G>A (p.Glu104Lys)	Uncertain Significance	0	-1	Domain-aggregate
DCLRE1C	NM_001033855.3(DCLRE1C):c.251C>G (p.Ser84Cys)	Uncertain Significance	0	-2	Domain-aggregate
DCLRE1C	NM_001033855.3(DCLRE1C):c.227G>C (p.Arg76Thr)	Benign	0	-3	Domain-aggregate
DCLRE1C	NM_001033855.3(DCLRE1C):c.137C>T (p.Thr46Ile)	Uncertain Significance	0	-2	Domain-aggregate
DCLRE1C	NM_001033855.3(DCLRE1C):c.103C>G (p.His35Asp)	Pathogenic	0	2	Domain-aggregate
DCLRE1C	NM_001033855.3(DCLRE1C):c.57C>A (p.Phe19Leu)	Uncertain Significance	0	4	Domain-aggregate
DCLRE1C	NM_001033855.3(DCLRE1C):c.484G>A (p.Val162Ile)	Uncertain Significance	0	-3	Domain-aggregate
DCLRE1C	NM_001033855.3(DCLRE1C):c.632G>C (p.Gly211Ala)	Uncertain Significance	0	4	Domain-aggregate
DCLRE1C	NM_001033855.3(DCLRE1C):c.315G>C (p.Glu105Asp)	Uncertain Significance	0	-3	Domain-aggregate
DCLRE1C	NM_001033855.3(DCLRE1C):c.247A>C (p.Ile83Leu)	Uncertain Significance	0	-2	Domain-aggregate
DCLRE1C	NM_001033855.3(DCLRE1C):c.346T>C (p.Cys116Arg)	Likely Pathogenic	0	2	Domain-aggregate
DCLRE1C	NM_001033855.3(DCLRE1C):c.194C>T (p.Thr65Ile)	Pathogenic	0	2	Domain-aggregate
DCLRE1C	NM_001033855.3(DCLRE1C):c.1334G>A (p.Arg445His)	Likely Benign	0	-3	Domain-aggregate
DCLRE1C	NM_001033855.3(DCLRE1C):c.509A>G (p.Asp170Gly)	Uncertain Significance	0	1	Domain-aggregate
DCLRE1C	NM_001033855.3(DCLRE1C):c.475A>T (p.Ile159Phe)	Uncertain Significance	0	0	Domain-aggregate
DCLRE1C	NM_001033855.3(DCLRE1C):c.419C>T (p.Ala140Val)	Likely Benign	0	0	Domain-aggregate
DCLRE1C	NM_001033855.3(DCLRE1C):c.25G>A (p.Ala9Thr)	Uncertain Significance	0	-3	Domain-aggregate
DCLRE1C	NM_001033855.3(DCLRE1C):c.24G>A (p.Met8Ile)	Uncertain Significance	0	2	Domain-aggregate
DCLRE1C	NM_001033855.3(DCLRE1C):c.614A>T (p.Asn205Ile)	Uncertain Significance	0	2	Domain-aggregate
DCLRE1C	NM_001033855.3(DCLRE1C):c.1284A>C (p.Lys428Asn)	Benign	0	-3	Domain-aggregate
DCLRE1C	NM_001033855.3(DCLRE1C):c.131C>A (p.Ala44Asp)	Uncertain Significance	0	0	Domain-aggregate
DCLRE1C	NM_001033855.3(DCLRE1C):c.95C>G (p.Ser32Cys)	Likely Pathogenic	0	2	Domain-aggregate
DCLRE1C	NM_001033855.3(DCLRE1C):c.82G>C (p.Ala28Pro)	Likely Pathogenic	0	2	Domain-aggregate
DCLRE1C	NM_001033855.3(DCLRE1C):c.406G>A (p.Asp136Asn)	Likely Pathogenic	0	2	Domain-aggregate
DCLRE1C	NM_001033855.3(DCLRE1C):c.242G>A (p.Arg81Gln)	Uncertain Significance	0	-2	Domain-aggregate
DCLRE1C	NM_001033855.3(DCLRE1C):c.550A>T (p.Ser184Cys)	Uncertain Significance	0	-3	Domain-aggregate
DCLRE1C	NM_001033855.3(DCLRE1C):c.539A>T (p.Glu180Val)	Uncertain Significance	0	-1	Domain-aggregate
DCLRE1C	NM_001033855.3(DCLRE1C):c.490T>G (p.Leu164Val)	Uncertain Significance	0	-3	Domain-aggregate
DCLRE1C	NM_001033855.3(DCLRE1C):c.457G>T (p.Gly153Trp)	Uncertain Significance	0	0	Domain-aggregate
DCLRE1C	NM_001033855.3(DCLRE1C):c.436A>G (p.Arg146Gly)	Uncertain Significance	0	1	Domain-aggregate
DCLRE1C	NM_001033855.3(DCLRE1C):c.41T>C (p.Ile14Thr)	Uncertain Significance	0	3	Domain-aggregate
DCLRE1C	NM_001033855.3(DCLRE1C):c.41T>G (p.Ile14Ser)	Uncertain Significance	0	3	Domain-aggregate
DCLRE1C	NM_001033855.3(DCLRE1C):c.34C>T (p.Pro12Ser)	Uncertain Significance	0	0	Domain-aggregate
DCLRE1C	NM_001033855.3(DCLRE1C):c.13G>C (p.Glu5Gln)	Uncertain Significance	0	-3	Domain-aggregate
DCLRE1C	NM_001033855.3(DCLRE1C):c.319G>A (p.Val107Ile)	Uncertain Significance	0	-3	Domain-aggregate
DCLRE1C	NM_001033855.3(DCLRE1C):c.276G>C (p.Gln92His)	Uncertain Significance	0	-1	Domain-aggregate
DCLRE1C	NM_001033855.3(DCLRE1C):c.247A>G (p.Ile83Val)	Uncertain Significance	0	-3	Domain-aggregate
DCLRE1C	NM_001033855.3(DCLRE1C):c.181T>C (p.Cys61Arg)	Uncertain Significance	0	2	Domain-aggregate
DCLRE1C	NM_001033855.3(DCLRE1C):c.1894G>A (p.Glu632Lys)	Benign	0	-4	Domain-aggregate
DCLRE1C	NM_001033855.3(DCLRE1C):c.959C>G (p.Ser320Cys)	Benign	0	-1	Domain-aggregate
DCLRE1C	NM_001033855.3(DCLRE1C):c.169G>T (p.Val57Phe)	Likely Benign	0	0	Domain-aggregate
DYSF	NM_003494.4(DYSF):c.17T>A (p.Ile6Asn)	Uncertain Significance	0	2	Domain-aggregate
DYSF	NM_001130987.2(DYSF):c.4643T>G (p.Leu1548Arg)	Uncertain Significance	1	-1	Domain-aggregate
DYSF	NM_001130987.2(DYSF):c.5626G>A (p.Asp1876Asn)	Pathogenic	1	-2	Domain-aggregate
DYSF	NM_001130987.2(DYSF):c.1439T>C (p.Leu480Pro)	Pathogenic	1	2	Domain-aggregate
ITGA2B	NM_000419.5(ITGA2B):c.1366G>A (p.Val456Ile)	Uncertain Significance	-1	-3	Domain-aggregate
ITGA2B	NM_000419.5(ITGA2B):c.230G>A (p.Ser77Asn)	Uncertain Significance	-1	-3	Domain-aggregate
ITGA2B	NM_000419.5(ITGA2B):c.2198C>T (p.Ala733Val)	Uncertain Significance	-1	-2	Domain-aggregate
ITGA2B	NM_000419.5(ITGA2B):c.2569T>C (p.Cys857Arg)	Uncertain Significance	1	3	Domain-aggregate
ITGA2B	NM_000419.5(ITGA2B):c.1157G>A (p.Arg386Gln)	Uncertain Significance	0	0	Domain-aggregate
ITGA2B	NM_000419.5(ITGA2B):c.857T>A (p.Val286Asp)	Likely Pathogenic	1	2	Domain-aggregate
ITGA2B	NM_000419.4(ITGA2B):c.1072C>T (p.Arg358Cys)	Uncertain Significance	0	-1	Domain-aggregate
ITGA2B	NM_000419.5(ITGA2B):c.2471C>G (p.Thr824Ser)	Uncertain Significance	-1	-2	Domain-aggregate
ITGA2B	NM_000419.5(ITGA2B):c.3077G>A (p.Arg1026Gln)	Uncertain Significance	1	0	Domain-aggregate
ITGA2B	NM_000419.5(ITGA2B):c.842C>T (p.Thr281Ile)	Likely Pathogenic	0	0	Domain-aggregate
ITGA2B	NM_000419.5(ITGA2B):c.628G>C (p.Gly210Arg)	Uncertain Significance	0	0	Domain-aggregate
ITGA2B	NM_000419.5(ITGA2B):c.1958C>T (p.Pro653Leu)	Uncertain Significance	-1	-2	Domain-aggregate
ITGA2B	NM_000419.5(ITGA2B):c.118A>G (p.Thr40Ala)	Uncertain Significance	-1	-3	Domain-aggregate
ITGA2B	NM_000419.5(ITGA2B):c.3099A>T (p.Glu1033Asp)	Uncertain Significance	-1	-3	Domain-aggregate
ITGA2B	NM_000419.5(ITGA2B):c.2507G>C (p.Gly836Ala)	Uncertain Significance	-1	-2	Domain-aggregate
ITGA2B	NM_000419.5(ITGA2B):c.1374C>G (p.Ile458Met)	Benign	0	-1	Domain-aggregate
ITGA2B	NM_000419.5(ITGA2B):c.2363C>A (p.Ala788Asp)	Uncertain Significance	-1	0	Domain-aggregate
ITGA2B	NM_000419.5(ITGA2B):c.2504C>T (p.Pro835Leu)	Uncertain Significance	1	0	Domain-aggregate
ITGA2B	NM_000419.5(ITGA2B):c.2511G>C (p.Gln837His)	Benign	-1	-1	Domain-aggregate
ITGA2B	NM_000419.4(ITGA2B):c.1043G>A (p.Arg348Gln)	Uncertain Significance	-1	-2	Domain-aggregate
ITGA2B	NM_000419.5(ITGA2B):c.818G>A (p.Gly273Asp)	Likely Pathogenic	1	3	Domain-aggregate
ITGA2B	NM_000419.5(ITGA2B):c.1772A>C (p.Asp591Ala)	Pathogenic	1	3	Domain-aggregate
ITGA2B	NM_000419.5(ITGA2B):c.1628G>A (p.Arg543Gln)	Uncertain Significance	-1	-3	Domain-aggregate
ITGA2B	NM_000419.5(ITGA2B):c.1888G>A (p.Val630Ile)	Uncertain Significance	-1	-3	Domain-aggregate
ITGA2B	NM_000419.5(ITGA2B):c.2556G>C (p.Gln852His)	Uncertain Significance	-1	-1	Domain-aggregate
ITGA2B	NM_000419.5(ITGA2B):c.1346G>A (p.Gly449Asp)	Likely Pathogenic	1	4	Domain-aggregate
ITGA2B	NM_000419.4(ITGA2B):c.641T>C (p.Leu214Pro)	Pathogenic	1	3	Domain-aggregate
ITGA2B	NM_000419.4(ITGA2B):c.2614C>A (p.Leu872Met)	Benign	-1	-2	Domain-aggregate
ITGA2B	NM_000419.5(ITGA2B):c.1708G>A (p.Gly570Arg)	Uncertain Significance	-1	-3	Domain-aggregate
ITGA2B	NM_000419.5(ITGA2B):c.43G>A (p.Glu15Lys)	Uncertain Significance	0	-2	Domain-aggregate
ITGA2B	NM_000419.5(ITGA2B):c.1063G>A (p.Glu355Lys)	Pathogenic	1	1	Domain-aggregate
ITGA2B	NM_000419.4(ITGA2B):c.2870C>T (p.Ser957Leu)	Uncertain Significance	0	2	Domain-aggregate
ITGA2B	NM_000419.5(ITGA2B):c.3076C>T (p.Arg1026Trp)	Uncertain Significance	1	0	Domain-aggregate
ITGA2B	NM_000419.5(ITGA2B):c.1945G>T (p.Val649Leu)	Benign	-1	-2	Domain-aggregate
ITGA2B	NM_000419.5(ITGA2B):c.1627C>T (p.Arg543Trp)	Benign	-1	-2	Domain-aggregate
ITGA2B	NM_000419.4(ITGA2B):c.2944G>A (p.Val982Met)	Pathogenic	1	0	Domain-aggregate
ITGA2B	NM_000419.5(ITGA2B):c.560T>C (p.Val187Ala)	Uncertain Significance	0	-3	Domain-aggregate
ACADVL	NM_000018.4(ACADVL):c.1019G>T (p.Gly340Val)	Uncertain Significance	1	2	Domain-aggregate
ACADVL	NM_000018.4(ACADVL):c.637G>C (p.Ala213Pro)	Likely Pathogenic	1	2	Domain-aggregate
ACADVL	NM_000018.4(ACADVL):c.652G>A (p.Glu218Lys)	Likely Pathogenic	1	2	Domain-aggregate
ACADVL	NM_000018.4(ACADVL):c.1013A>G (p.Asn338Ser)	Uncertain Significance	1	0	Domain-aggregate
ACADVL	NM_000018.4(ACADVL):c.637G>A (p.Ala213Thr)	Likely Pathogenic	1	0	Domain-aggregate
ACADVL	NM_000018.4(ACADVL):c.605T>C (p.Leu202Pro)	Likely Pathogenic	1	2	Domain-aggregate
ACADVL	NM_000018.4(ACADVL):c.521T>C (p.Val174Ala)	Uncertain Significance	1	0	Domain-aggregate
ACADVL	NM_000018.4(ACADVL):c.818G>C (p.Gly273Ala)	Uncertain Significance	1	-1	Domain-aggregate
ACADVL	NM_000018.4(ACADVL):c.1837C>T (p.Arg613Trp)	Likely Pathogenic	1	0	Domain-aggregate
ACADVL	NM_000018.4(ACADVL):c.1001T>G (p.Met334Arg)	Uncertain Significance	1	2	Domain-aggregate
ACADVL	NM_000018.4(ACADVL):c.1103A>C (p.Gln368Pro)	Uncertain Significance	1	0	Domain-aggregate
ACADVL	NM_000018.4(ACADVL):c.1146G>C (p.Lys382Asn)	Likely Pathogenic	1	2	Domain-aggregate
ACADVL	NM_000018.4(ACADVL):c.482C>T (p.Ala161Val)	Uncertain Significance	1	0	Domain-aggregate
ACADVL	NM_000018.4(ACADVL):c.640T>G (p.Phe214Val)	Uncertain Significance	1	2	Domain-aggregate
ACADVL	NM_000018.4(ACADVL):c.538G>A (p.Ala180Thr)	Likely Pathogenic	1	1	Domain-aggregate
ACADVL	NM_000018.4(ACADVL):c.578G>A (p.Gly193Asp)	Uncertain Significance	1	2	Domain-aggregate
ACADVL	NM_000018.4(ACADVL):c.602A>G (p.Tyr201Cys)	Likely Pathogenic	1	1	Domain-aggregate
ACADVL	NM_000018.4(ACADVL):c.1405C>T (p.Arg469Trp)	Likely Pathogenic	1	0	Domain-aggregate
ACADVL	NM_000018.4(ACADVL):c.1022G>C (p.Arg341Thr)	Uncertain Significance	1	2	Domain-aggregate
ACADVL	NM_000018.4(ACADVL):c.911C>T (p.Ala304Val)	Uncertain Significance	1	0	Domain-aggregate
ACADVL	NM_000018.4(ACADVL):c.1358G>A (p.Arg453Gln)	Likely Pathogenic	1	1	Domain-aggregate
ACADVL	NM_000018.4(ACADVL):c.1064T>C (p.Ile355Thr)	Uncertain Significance	0	-2	Domain-aggregate
ACADVL	NM_000018.4(ACADVL):c.481G>A (p.Ala161Thr)	Likely Pathogenic	1	-1	Domain-aggregate
ACADVL	NM_000018.4(ACADVL):c.779C>T (p.Thr260Met)	Likely Pathogenic	1	0	Domain-aggregate
ACADVL	NM_000018.4(ACADVL):c.619T>C (p.Ser207Pro)	Likely Pathogenic	1	1	Domain-aggregate
ACADVL	NM_000018.4(ACADVL):c.1220G>C (p.Gly407Ala)	Likely Pathogenic	1	-1	Domain-aggregate
ACADVL	NM_000018.4(ACADVL):c.1349G>A (p.Arg450His)	Likely Pathogenic	1	-2	Domain-aggregate
ACADVL	NM_000018.4(ACADVL):c.515T>C (p.Leu172Pro)	Likely Pathogenic	1	1	Domain-aggregate
ACADVL	NM_000018.4(ACADVL):c.1406G>A (p.Arg469Gln)	Likely Pathogenic	1	0	Domain-aggregate
ACADVL	NM_000018.4(ACADVL):c.439C>T (p.Pro147Ser)	Uncertain Significance	1	-1	Domain-aggregate
ACADVL	NM_000018.4(ACADVL):c.364A>G (p.Asn122Asp)	Likely Pathogenic	1	1	Domain-aggregate
ACADVL	NM_000018.4(ACADVL):c.1076C>T (p.Ala359Val)	Uncertain Significance	1	-1	Domain-aggregate
ACADVL	NM_000018.4(ACADVL):c.419G>A (p.Gly140Glu)	Likely Pathogenic	1	1	Domain-aggregate
ACADVL	NM_000018.4(ACADVL):c.1748C>T (p.Ser583Leu)	Uncertain Significance	0	3	Domain-aggregate
ACADVL	NM_000018.4(ACADVL):c.1097G>A (p.Arg366His)	Likely Pathogenic	1	0	Domain-aggregate
ACADVL	NM_000018.4(ACADVL):c.109C>T (p.Arg37Trp)	Uncertain Significance	-1	-3	Domain-aggregate
ACADVL	NM_000018.4(ACADVL):c.1372T>C (p.Phe458Leu)	Likely Pathogenic	1	2	Domain-aggregate
ACADVL	NM_000018.4(ACADVL):c.1322G>A (p.Gly441Asp)	Pathogenic	1	2	Domain-aggregate
ACADVL	NM_000018.4(ACADVL):c.848T>C (p.Val283Ala)	Pathogenic	1	0	Domain-aggregate
ACADVL	NM_000018.4(ACADVL):c.1096C>T (p.Arg366Cys)	Likely Pathogenic	1	1	Domain-aggregate
ACADVL	NM_000018.4(ACADVL):c.562G>A (p.Gly188Ser)	Uncertain Significance	1	1	Domain-aggregate
ACADVL	NM_000018.4(ACADVL):c.1468G>C (p.Ala490Pro)	Likely Pathogenic	1	3	Domain-aggregate
ACADVL	NM_000018.4(ACADVL):c.790A>G (p.Lys264Glu)	Likely Pathogenic	1	0	Domain-aggregate
ACADVL	NM_000018.4(ACADVL):c.425T>C (p.Phe142Ser)	Uncertain Significance	1	1	Domain-aggregate
ACADVL	NM_000018.4(ACADVL):c.953C>T (p.Pro318Leu)	Likely Pathogenic	1	0	Domain-aggregate
ACADVL	NM_000018.4(ACADVL):c.339C>A (p.Phe113Leu)	Uncertain Significance	0	1	Domain-aggregate
ACADVL	NM_000018.4(ACADVL):c.68G>A (p.Arg23Gln)	Benign	-1	-3	Domain-aggregate
ACADVL	NM_000018.4(ACADVL):c.751A>G (p.Ser251Gly)	Likely Pathogenic	1	1	Domain-aggregate
ACADVL	NM_000018.4(ACADVL):c.865G>A (p.Gly289Arg)	Likely Pathogenic	1	-2	Domain-aggregate
ACADVL	NM_000018.4(ACADVL):c.896A>T (p.Lys299Met)	Likely Pathogenic	1	2	Domain-aggregate
ACADVL	NM_000018.4(ACADVL):c.881G>A (p.Gly294Glu)	Uncertain Significance	1	1	Domain-aggregate
ACADVL	NM_000018.4(ACADVL):c.1309A>G (p.Met437Val)	Uncertain Significance	0	-2	Domain-aggregate
ACADVL	NM_000018.4(ACADVL):c.1144A>C (p.Lys382Gln)	Likely Pathogenic	1	0	Domain-aggregate
ACADVL	NM_000018.4(ACADVL):c.553G>A (p.Gly185Ser)	Likely Pathogenic	1	1	Domain-aggregate
ACADVL	NM_000018.4(ACADVL):c.577G>C (p.Gly193Arg)	Uncertain Significance	1	2	Domain-aggregate
ACADVL	NM_000018.4(ACADVL):c.1838G>A (p.Arg613Gln)	Uncertain Significance	0	-1	Domain-aggregate
ACADVL	NM_000018.4(ACADVL):c.1239A>G (p.Ile413Met)	Uncertain Significance	0	-2	Domain-aggregate
ACADVL	NM_000018.4(ACADVL):c.1434G>A (p.Met478Ile)	Likely Pathogenic	0	0	Domain-aggregate
GP1BB	NM_000407.5(GP1BB):c.47T>C (p.Leu16Pro)	Likely Pathogenic	2	-1	Domain-aggregate
GP1BB	NM_000407.5(GP1BB):c.119G>A (p.Gly40Glu)	Benign	0	1	Domain-aggregate
GP1BB	NM_000407.5(GP1BB):c.389C>T (p.Pro130Leu)	Benign	-1	-1	Domain-aggregate
GP1BB	NM_000407.5(GP1BB):c.127G>T (p.Gly43Trp)	Uncertain Significance	2	1	Domain-aggregate
GP1BB	NM_000407.5(GP1BB):c.338A>G (p.Tyr113Cys)	Likely Pathogenic	1	3	Domain-aggregate
GP1BB	NM_000407.5(GP1BB):c.268C>T (p.Pro90Ser)	Likely Pathogenic	1	0	Domain-aggregate
GP1BB	NM_000407.5(GP1BB):c.397G>C (p.Ala133Pro)	Likely Pathogenic	0	-1	Domain-aggregate
GP1BB	NM_000407.5(GP1BB):c.544G>T (p.Ala182Ser)	Benign	-1	-3	Domain-aggregate
ACTA1	NM_001100.4(ACTA1):c.172G>A (p.Asp58Asn)	Likely Pathogenic	1	0	Domain-aggregate
ACTA1	NM_001100.4(ACTA1):c.1106C>T (p.Pro369Leu)	Pathogenic	1	0	Domain-aggregate
ACTA1	NM_001100.4(ACTA1):c.283G>A (p.Glu95Lys)	Pathogenic	1	1	Domain-aggregate
ACTA1	NM_001100.4(ACTA1):c.1071G>C (p.Met357Ile)	Uncertain Significance	1	0	Domain-aggregate
ACTA1	NM_001100.4(ACTA1):c.334C>A (p.Leu112Ile)	Uncertain Significance	1	0	Domain-aggregate
ACTA1	NM_001100.4(ACTA1):c.1001C>G (p.Pro334Arg)	Pathogenic	1	0	Domain-aggregate
ACTA1	NM_001100.4(ACTA1):c.493G>A (p.Val165Met)	Pathogenic	1	0	Domain-aggregate
ACTA1	NM_001100.4(ACTA1):c.1127G>T (p.Cys376Phe)	Likely Pathogenic	1	0	Domain-aggregate
ACTA1	NM_001100.4(ACTA1):c.1054T>C (p.Ser352Pro)	Likely Pathogenic	1	0	Domain-aggregate
ACTA1	NM_001100.4(ACTA1):c.1043T>A (p.Leu348Gln)	Likely Pathogenic	1	1	Domain-aggregate
ACTA1	NM_001100.4(ACTA1):c.1074G>T (p.Trp358Cys)	Likely Pathogenic	1	0	Domain-aggregate
ACTA1	NM_001100.4(ACTA1):c.868G>C (p.Asp290His)	Pathogenic	1	1	Domain-aggregate
ACTA1	NM_001100.4(ACTA1):c.124C>T (p.His42Tyr)	Pathogenic	1	0	Domain-aggregate
ACTA1	NM_001100.4(ACTA1):c.414C>G (p.Ile138Met)	Likely Pathogenic	1	0	Domain-aggregate
ACTA1	NM_001100.4(ACTA1):c.109G>T (p.Val37Leu)	Pathogenic	1	0	Domain-aggregate
ACTA1	NM_001100.4(ACTA1):c.442G>A (p.Gly148Ser)	Likely Pathogenic	1	1	Domain-aggregate
ACTA1	NM_001100.4(ACTA1):c.1001C>T (p.Pro334Leu)	Likely Pathogenic	1	0	Domain-aggregate
ACTA1	NM_001100.4(ACTA1):c.1000C>T (p.Pro334Ser)	Pathogenic	1	0	Domain-aggregate
ACTA1	NM_001100.4(ACTA1):c.442G>C (p.Gly148Arg)	Likely Pathogenic	1	1	Domain-aggregate
ACTA1	NM_001100.4(ACTA1):c.304G>A (p.Glu102Lys)	Likely Pathogenic	1	0	Domain-aggregate
ACTA1	NM_001100.4(ACTA1):c.1007A>C (p.Glu336Ala)	Likely Pathogenic	1	0	Domain-aggregate
ACTA1	NM_001100.4(ACTA1):c.443G>T (p.Gly148Val)	Likely Pathogenic	1	1	Domain-aggregate
ACTA1	NM_001100.4(ACTA1):c.175G>A (p.Glu59Lys)	Likely Pathogenic	1	1	Domain-aggregate
ACTA1	NM_001100.4(ACTA1):c.37G>A (p.Asp13Asn)	Likely Pathogenic	1	1	Domain-aggregate
ACTA1	NM_001100.4(ACTA1):c.1075A>C (p.Ile359Leu)	Pathogenic	1	0	Domain-aggregate
ACVRL1	NM_000020.3(ACVRL1):c.982C>T (p.His328Tyr)	Likely Pathogenic	1	2	Domain-aggregate
ACVRL1	NM_000020.3(ACVRL1):c.1232G>A (p.Arg411Gln)	Pathogenic	1	0	Domain-aggregate
ACVRL1	NM_000020.3(ACVRL1):c.88C>T (p.Pro30Ser)	Likely Benign	0	-3	Domain-aggregate
ACVRL1	NM_000020.3(ACVRL1):c.113G>A (p.Ser38Asn)	Uncertain Significance	0	-4	Domain-aggregate
ACVRL1	NM_000020.3(ACVRL1):c.1348A>G (p.Thr450Ala)	Likely Benign	0	-4	Domain-aggregate
ACVRL1	NM_000020.3(ACVRL1):c.652C>T (p.Arg218Trp)	Likely Benign	1	0	Domain-aggregate
ACVRL1	NM_000020.3(ACVRL1):c.706G>A (p.Glu236Lys)	Pathogenic	1	2	Domain-aggregate
ACVRL1	NM_000020.3(ACVRL1):c.1445C>T (p.Ala482Val)	Likely Benign	1	-1	Domain-aggregate
ACVRL1	NM_000020.3(ACVRL1):c.998G>T (p.Ser333Ile)	Pathogenic	1	2	Domain-aggregate
ACVRL1	NM_000020.3(ACVRL1):c.137G>C (p.Cys46Ser)	Likely Pathogenic	1	4	Domain-aggregate
PIK3R2	NM_005027.4(PIK3R2):c.160G>A (p.Val54Met)	Benign	0	-1	Domain-aggregate
RUNX1	NM_001754.5(RUNX1):c.256C>G (p.Pro86Ala)	Uncertain Significance	0	1	Domain-aggregate
RUNX1	NM_001754.5(RUNX1):c.1076C>G (p.Pro359Arg)	Uncertain Significance	0	0	Domain-aggregate
RUNX1	NM_001754.5(RUNX1):c.883T>C (p.Ser295Pro)	Uncertain Significance	-1	-2	Domain-aggregate
RUNX1	NM_001754.5(RUNX1):c.1100G>A (p.Gly367Asp)	Uncertain Significance	0	0	Domain-aggregate
RUNX1	NM_001754.5(RUNX1):c.1310C>T (p.Thr437Ile)	Uncertain Significance	-1	0	Domain-aggregate
RUNX1	NM_001754.5(RUNX1):c.1118C>T (p.Ser373Leu)	Uncertain Significance	-1	0	Domain-aggregate
RUNX1	NM_001754.5(RUNX1):c.1070C>G (p.Pro357Arg)	Uncertain Significance	0	2	Domain-aggregate
RUNX1	NM_001754.5(RUNX1):c.829C>G (p.Pro277Ala)	Uncertain Significance	-1	-1	Domain-aggregate
RUNX1	NM_001754.5(RUNX1):c.1075C>T (p.Pro359Ser)	Uncertain Significance	-1	-1	Domain-aggregate
RUNX1	NM_001754.5(RUNX1):c.1318G>C (p.Ala440Pro)	Uncertain Significance	-1	-2	Domain-aggregate
RUNX1	NM_001754.5(RUNX1):c.1301A>G (p.Asn434Ser)	Uncertain Significance	-1	-3	Domain-aggregate
RUNX1	NM_001754.5(RUNX1):c.1181G>A (p.Gly394Asp)	Uncertain Significance	-1	1	Domain-aggregate
RUNX1	NM_001754.4(RUNX1):c.305T>A (p.Leu102Gln)	Uncertain Significance	1	-3	Domain-aggregate
RUNX1	NM_001754.5(RUNX1):c.893C>T (p.Pro298Leu)	Uncertain Significance	-1	0	Domain-aggregate
RUNX1	NM_001754.5(RUNX1):c.1309A>G (p.Thr437Ala)	Uncertain Significance	-1	-2	Domain-aggregate
RUNX1	NM_001754.5(RUNX1):c.1318G>A (p.Ala440Thr)	Uncertain Significance	-1	-3	Domain-aggregate
RUNX1	NM_001754.5(RUNX1):c.211C>G (p.Leu71Val)	Uncertain Significance	-1	-3	Domain-aggregate
RUNX1	NM_001754.5(RUNX1):c.74T>C (p.Met25Thr)	Uncertain Significance	-1	2	Domain-aggregate
RUNX1	NM_001754.5(RUNX1):c.358G>A (p.Ala120Thr)	Uncertain Significance	1	0	Domain-aggregate
RUNX1	NM_001754.5(RUNX1):c.829C>T (p.Pro277Ser)	Uncertain Significance	-1	-1	Domain-aggregate
RUNX1	NM_001754.5(RUNX1):c.1139A>G (p.Tyr380Cys)	Uncertain Significance	0	0	Domain-aggregate
RUNX1	NM_001754.5(RUNX1):c.1085C>T (p.Ser362Leu)	Uncertain Significance	-1	-1	Domain-aggregate
RUNX1	NM_001754.5(RUNX1):c.1070C>T (p.Pro357Leu)	Uncertain Significance	-1	0	Domain-aggregate
RUNX1	NM_001754.5(RUNX1):c.646C>T (p.Pro216Ser)	Uncertain Significance	-1	-3	Domain-aggregate
RUNX1	NM_001754.5(RUNX1):c.1076C>T (p.Pro359Leu)	Uncertain Significance	0	0	Domain-aggregate
RUNX1	NM_001754.5(RUNX1):c.1099G>T (p.Gly367Cys)	Uncertain Significance	0	-2	Domain-aggregate
RUNX1	NM_001754.5(RUNX1):c.941C>G (p.Ser314Cys)	Uncertain Significance	-1	-1	Domain-aggregate
RUNX1	NM_001754.5(RUNX1):c.343G>A (p.Ala115Thr)	Uncertain Significance	1	0	Domain-aggregate
RUNX1	NM_001754.5(RUNX1):c.74T>G (p.Met25Arg)	Uncertain Significance	-1	2	Domain-aggregate
RUNX1	NM_001754.5(RUNX1):c.1099G>C (p.Gly367Arg)	Uncertain Significance	0	0	Domain-aggregate
RUNX1	NM_001754.5(RUNX1):c.1069C>T (p.Pro357Ser)	Uncertain Significance	-1	0	Domain-aggregate
RUNX1	NM_001754.5(RUNX1):c.1084T>G (p.Ser362Ala)	Uncertain Significance	-1	-3	Domain-aggregate
RUNX1	NM_001754.5(RUNX1):c.310A>G (p.Thr104Ala)	Uncertain Significance	0	-1	Domain-aggregate
RUNX1	NM_001754.5(RUNX1):c.1300A>G (p.Asn434Asp)	Uncertain Significance	-1	0	Domain-aggregate
RUNX1	NM_001754.5(RUNX1):c.1310C>G (p.Thr437Ser)	Uncertain Significance	-1	-2	Domain-aggregate
RUNX1	NM_001754.5(RUNX1):c.940T>C (p.Ser314Pro)	Uncertain Significance	-1	-3	Domain-aggregate
RUNX1	NM_001754.5(RUNX1):c.1117T>G (p.Ser373Ala)	Uncertain Significance	-1	-2	Domain-aggregate
HNF1A	NM_000545.8(HNF1A):c.461T>C (p.Met154Thr)	Likely Pathogenic	1	4	Domain-aggregate
HNF1A	NM_000545.8(HNF1A):c.769A>C (p.Asn257His)	Likely Pathogenic	1	3	Domain-aggregate
HNF1A	NM_000545.8(HNF1A):c.416T>C (p.Leu139Pro)	Likely Pathogenic	1	4	Domain-aggregate
HNF1A	NM_000545.8(HNF1A):c.343G>T (p.Val115Leu)	Likely Pathogenic	1	2	Domain-aggregate
HNF1A	NM_000545.8(HNF1A):c.1729C>G (p.His577Asp)	Benign	0	-1	Domain-aggregate
HNF1A	NM_000545.8(HNF1A):c.1747C>G (p.Arg583Gly)	Uncertain Significance	0	-3	Domain-aggregate
HNF1A	NM_000545.8(HNF1A):c.1135C>T (p.Pro379Ser)	Benign	1	2	Domain-aggregate
HNF1A	NM_000545.8(HNF1A):c.66C>G (p.Ser22Arg)	Uncertain Significance	1	0	Domain-aggregate
HNF1A	NM_000545.8(HNF1A):c.703G>C (p.Glu235Gln)	Uncertain Significance	1	1	Domain-aggregate
HNF1A	NM_000545.8(HNF1A):c.347C>T (p.Ala116Val)	Pathogenic	1	3	Domain-aggregate
HNF1A	NM_000545.8(HNF1A):c.695T>C (p.Leu232Pro)	Likely Pathogenic	1	4	Domain-aggregate
HNF1A	NM_000545.8(HNF1A):c.461T>G (p.Met154Arg)	Uncertain Significance	1	4	Domain-aggregate
HNF1A	NM_000545.8(HNF1A):c.1637A>C (p.Asp546Ala)	Uncertain Significance	0	-4	Domain-aggregate
HNF1A	NM_000545.8(HNF1A):c.1745A>G (p.His582Arg)	Likely Benign	0	-4	Domain-aggregate
HNF1A	NM_000545.8(HNF1A):c.539C>T (p.Ala180Val)	Likely Benign	0	-2	Domain-aggregate
HNF1A	NM_000545.8(HNF1A):c.367C>G (p.Leu123Val)	Likely Pathogenic	1	0	Domain-aggregate
HNF1A	NM_000545.8(HNF1A):c.1135C>A (p.Pro379Thr)	Uncertain Significance	1	2	Domain-aggregate
HNF1A	NM_000545.8(HNF1A):c.1136C>G (p.Pro379Arg)	Pathogenic	1	3	Domain-aggregate
HNF1A	NM_000545.8(HNF1A):c.1556C>T (p.Pro519Leu)	Pathogenic	1	2	Domain-aggregate
HNF1A	NM_000545.8(HNF1A):c.503G>A (p.Arg168His)	Likely Benign	1	-2	Domain-aggregate
HNF1A	NM_000545.8(HNF1A):c.353T>C (p.Met118Thr)	Uncertain Significance	1	-1	Domain-aggregate
HNF1A	NM_000545.8(HNF1A):c.415C>T (p.Leu139Phe)	Likely Pathogenic	1	3	Domain-aggregate
HNF1A	NM_000545.8(HNF1A):c.139G>C (p.Gly47Arg)	Uncertain Significance	0	-3	Domain-aggregate
HNF1A	NM_000545.8(HNF1A):c.686G>A (p.Arg229Gln)	Pathogenic	1	4	Domain-aggregate
HNF1A	NM_000545.8(HNF1A):c.710A>C (p.Asn237Thr)	Uncertain Significance	1	4	Domain-aggregate
HNF1A	NM_000545.8(HNF1A):c.788G>A (p.Arg263His)	Pathogenic	1	4	Domain-aggregate
HNF1A	NM_000545.6(HNF1A):c.817A>C (p.Lys273Gln)	Uncertain Significance	1	4	Domain-aggregate
HNF1A	NM_000545.8(HNF1A):c.1781G>T (p.Ser594Ile)	Pathogenic	1	2	Domain-aggregate
HNF1A	NM_000545.8(HNF1A):c.1849G>A (p.Val617Ile)	Benign	0	-4	Domain-aggregate
HNF1A	NM_000545.8(HNF1A):c.55T>G (p.Ser19Ala)	Uncertain Significance	1	-2	Domain-aggregate
HNF1A	NM_000545.6(HNF1A):c.475C>T (p.Arg159Trp)	Pathogenic	1	4	Domain-aggregate
HNF1A	NM_000545.6(HNF1A):c.787C>T (p.Arg263Cys)	Pathogenic	1	4	Domain-aggregate
HNF1A	NM_000545.8(HNF1A):c.56C>T (p.Ser19Leu)	Uncertain Significance	1	0	Domain-aggregate
HNF1A	NM_000545.8(HNF1A):c.1720A>G (p.Ser574Gly)	Benign	0	-4	Domain-aggregate
HNF1A	NM_000545.8(HNF1A):c.827C>A (p.Ala276Asp)	Pathogenic	1	4	Domain-aggregate
HNF1A	NM_000545.6(HNF1A):c.814C>T (p.Arg272Cys)	Pathogenic	1	4	Domain-aggregate
HNF1A	NM_000545.8(HNF1A):c.1541A>G (p.His514Arg)	Benign	1	-1	Domain-aggregate
HNF1A	NM_000545.6(HNF1A):c.749A>C (p.Gln250Pro)	Uncertain Significance	1	4	Domain-aggregate
HNF1A	NM_000545.8(HNF1A):c.340C>T (p.Arg114Cys)	Uncertain Significance	1	-2	Domain-aggregate
HNF1A	NM_000545.8(HNF1A):c.281C>T (p.Pro94Leu)	Likely Pathogenic	1	-2	Domain-aggregate
HNF1A	NM_000545.8(HNF1A):c.485T>C (p.Leu162Pro)	Likely Pathogenic	1	4	Domain-aggregate
HNF1A	NM_000545.8(HNF1A):c.29C>T (p.Thr10Met)	Uncertain Significance	0	-4	Domain-aggregate
HNF1A	NM_000545.6(HNF1A):c.608G>A (p.Arg203His)	Pathogenic	1	4	Domain-aggregate
HNF1A	NM_000545.6(HNF1A):c.779C>T (p.Thr260Met)	Pathogenic	1	4	Domain-aggregate
HNF1A	NM_000545.6(HNF1A):c.811C>T (p.Arg271Trp)	Pathogenic	1	4	Domain-aggregate
HNF1A	NM_000545.6(HNF1A):c.812G>A (p.Arg271Gln)	Pathogenic	1	3	Domain-aggregate
HNF1A	NM_000545.6(HNF1A):c.1663C>T (p.Leu555Phe)	Likely Benign	0	-4	Domain-aggregate
HNF1A	NM_000545.6(HNF1A):c.815G>A (p.Arg272His)	Pathogenic	1	4	Domain-aggregate
HNF1A	NM_000545.8(HNF1A):c.620G>A (p.Gly207Asp)	Pathogenic	1	4	Domain-aggregate
HNF1A	NM_000545.8(HNF1A):c.871C>T (p.Pro291Ser)	Likely Benign	0	-3	Domain-aggregate
HNF1A	NM_000545.6(HNF1A):c.392G>A (p.Arg131Gln)	Pathogenic	1	3	Domain-aggregate
HNF1A	NM_000545.8(HNF1A):c.1522G>A (p.Glu508Lys)	Benign	0	1	Domain-aggregate
HNF1A	NM_000545.8(HNF1A):c.434C>T (p.Ser145Phe)	Pathogenic	1	4	Domain-aggregate
HNF1A	NM_000545.8(HNF1A):c.866C>G (p.Pro289Arg)	Uncertain Significance	0	-1	Domain-aggregate
HNF1A	NM_000545.6(HNF1A):c.1340C>T (p.Pro447Leu)	Pathogenic	1	3	Domain-aggregate
HNF1A	NM_000545.6(HNF1A):c.1504C>G (p.Leu502Val)	Uncertain Significance	0	-3	Domain-aggregate
HNF1A	NM_000545.8(HNF1A):c.626C>A (p.Ala209Glu)	Likely Pathogenic	1	4	Domain-aggregate
HNF1A	NM_000545.8(HNF1A):c.871C>G (p.Pro291Ala)	Uncertain Significance	0	-3	Domain-aggregate
HNF1A	NM_000545.6(HNF1A):c.476G>A (p.Arg159Gln)	Pathogenic	1	2	Domain-aggregate
HNF1A	NM_000545.8(HNF1A):c.458C>T (p.Pro153Leu)	Uncertain Significance	1	2	Domain-aggregate
HNF1A	NM_000545.8(HNF1A):c.335C>T (p.Pro112Leu)	Pathogenic	1	1	Domain-aggregate
HNF1A	NM_000545.8(HNF1A):c.872C>A (p.Pro291Gln)	Likely Benign	0	-2	Domain-aggregate
HNF1A	NM_000545.8(HNF1A):c.85G>C (p.Ala29Pro)	Uncertain Significance	1	2	Domain-aggregate
HNF1A	NM_000545.6(HNF1A):c.827C>G (p.Ala276Gly)	Likely Pathogenic	1	3	Domain-aggregate
HNF1A	NM_000545.8(HNF1A):c.734G>T (p.Gly245Val)	Uncertain Significance	1	4	Domain-aggregate
HNF1A	NM_000545.8(HNF1A):c.760C>A (p.Leu254Met)	Uncertain Significance	1	3	Domain-aggregate
HNF1A	NM_000545.8(HNF1A):c.1768G>A (p.Val590Met)	Uncertain Significance	0	-3	Domain-aggregate
HNF1A	NM_000545.6(HNF1A):c.391C>T (p.Arg131Trp)	Pathogenic	1	3	Domain-aggregate
HNF1A	NM_000545.8(HNF1A):c.92G>A (p.Gly31Asp)	Benign	0	-3	Domain-aggregate
HNF1A	NM_000545.6(HNF1A):c.1114G>A (p.Ala372Thr)	Uncertain Significance	0	-3	Domain-aggregate
HNF1A	NM_000545.8(HNF1A):c.433T>C (p.Ser145Pro)	Uncertain Significance	1	4	Domain-aggregate
HNF1A	NM_000545.8(HNF1A):c.98C>T (p.Pro33Leu)	Likely Pathogenic	0	-3	Domain-aggregate
HNF1A	NM_000545.8(HNF1A):c.137A>C (p.Lys46Thr)	Uncertain Significance	1	-3	Domain-aggregate
HNF1A	NM_000545.6(HNF1A):c.803T>C (p.Phe268Ser)	Likely Pathogenic	1	4	Domain-aggregate
HNF1A	NM_000545.8(HNF1A):c.1513C>A (p.His505Asn)	Uncertain Significance	1	-2	Domain-aggregate
HNF1A	NM_000545.8(HNF1A):c.59G>C (p.Gly20Ala)	Likely Pathogenic	1	0	Domain-aggregate
HNF1A	NM_000545.8(HNF1A):c.794A>G (p.Tyr265Cys)	Uncertain Significance	1	4	Domain-aggregate
HNF1A	NM_000545.8(HNF1A):c.797A>G (p.Asn266Ser)	Uncertain Significance	1	4	Domain-aggregate
HNF1A	NM_000545.6(HNF1A):c.767C>T (p.Ser256Phe)	Uncertain Significance	1	3	Domain-aggregate
HNF1A	NM_000545.8(HNF1A):c.73G>A (p.Ala25Thr)	Uncertain Significance	0	-4	Domain-aggregate
HNF1A	NM_000545.8(HNF1A):c.557T>C (p.Ile186Thr)	Uncertain Significance	0	-4	Domain-aggregate
HNF1A	NM_000545.8(HNF1A):c.50T>A (p.Leu17His)	Uncertain Significance	1	0	Domain-aggregate
HNF1A	NM_000545.8(HNF1A):c.26A>G (p.Gln9Arg)	Uncertain Significance	1	1	Domain-aggregate
HNF1A	NM_000545.8(HNF1A):c.185A>G (p.Asn62Ser)	Benign	0	-3	Domain-aggregate
HNF1A	NM_000545.8(HNF1A):c.490A>C (p.Thr164Pro)	Uncertain Significance	1	2	Domain-aggregate
HNF1A	NM_000545.8(HNF1A):c.616T>A (p.Trp206Arg)	Likely Pathogenic	1	4	Domain-aggregate
HNF1A	NM_000545.6(HNF1A):c.790G>T (p.Val264Phe)	Likely Pathogenic	1	4	Domain-aggregate
HNF1A	NM_000545.8(HNF1A):c.365A>G (p.Tyr122Cys)	Likely Pathogenic	1	3	Domain-aggregate
HNF1A	NM_000545.8(HNF1A):c.34C>G (p.Leu12Val)	Likely Pathogenic	1	-1	Domain-aggregate
HNF1A	NM_000545.8(HNF1A):c.73G>C (p.Ala25Pro)	Uncertain Significance	0	0	Domain-aggregate
HNF1A	NM_000545.8(HNF1A):c.794A>C (p.Tyr265Ser)	Uncertain Significance	1	4	Domain-aggregate
HNF1A	NM_000545.8(HNF1A):c.392G>T (p.Arg131Leu)	Likely Pathogenic	1	4	Domain-aggregate
HNF1A	NM_000545.8(HNF1A):c.1780A>C (p.Ser594Arg)	Uncertain Significance	0	3	Domain-aggregate
HNF1A	NM_000545.8(HNF1A):c.1859C>T (p.Thr620Ile)	Uncertain Significance	0	3	Domain-aggregate
IDUA	NM_000203.5(IDUA):c.1598C>G (p.Pro533Arg)	Pathogenic	2	3	Domain-aggregate
IDUA	NM_000203.5(IDUA):c.1856G>A (p.Arg619Gln)	Likely Benign	0	-2	Domain-aggregate
IDUA	NM_000203.5(IDUA):c.964G>T (p.Val322Leu)	Uncertain Significance	2	0	Domain-aggregate
IDUA	NM_000203.5(IDUA):c.1051G>A (p.Ala351Thr)	Uncertain Significance	2	1	Domain-aggregate
IDUA	NM_000203.5(IDUA):c.296C>T (p.Thr99Ile)	Benign	0	-2	Domain-aggregate
IDUA	NM_000203.5(IDUA):c.1226G>A (p.Gly409Glu)	Uncertain Significance	0	-1	Domain-aggregate
IDUA	NM_000203.5(IDUA):c.667G>T (p.Asp223Tyr)	Uncertain Significance	2	2	Domain-aggregate
IDUA	NM_000203.5(IDUA):c.669C>G (p.Asp223Glu)	Uncertain Significance	1	2	Domain-aggregate
IDUA	NM_000203.5(IDUA):c.536C>T (p.Thr179Met)	Likely Pathogenic	2	0	Domain-aggregate
IDUA	NM_000203.5(IDUA):c.152G>A (p.Gly51Asp)	Pathogenic	2	2	Domain-aggregate
IDUA	NM_000203.5(IDUA):c.1152G>C (p.Lys384Asn)	Uncertain Significance	2	2	Domain-aggregate
IDUA	NM_000203.5(IDUA):c.1487C>T (p.Pro496Leu)	Likely Pathogenic	1	1	Domain-aggregate
IDUA	NM_000203.5(IDUA):c.99T>G (p.His33Gln)	Benign	0	-3	Domain-aggregate
IDUA	NM_000203.5(IDUA):c.236C>T (p.Ala79Val)	Likely Pathogenic	1	0	Domain-aggregate
IDUA	NM_000203.5(IDUA):c.1087C>T (p.Arg363Cys)	Likely Pathogenic	2	2	Domain-aggregate
IDUA	NM_000203.5(IDUA):c.1771G>A (p.Ala591Thr)	Likely Benign	-1	-3	Domain-aggregate
IDUA	NM_000203.5(IDUA):c.1499A>G (p.Gln500Arg)	Likely Pathogenic	0	0	Domain-aggregate
IDUA	NM_000203.5(IDUA):c.536C>G (p.Thr179Arg)	Pathogenic	2	2	Domain-aggregate
IDUA	NM_000203.5(IDUA):c.1091C>G (p.Thr364Arg)	Uncertain Significance	2	2	Domain-aggregate
IDUA	NM_000203.5(IDUA):c.223G>A (p.Ala75Thr)	Pathogenic	2	0	Domain-aggregate
IDUA	NM_000203.5(IDUA):c.1091C>A (p.Thr364Lys)	Uncertain Significance	2	2	Domain-aggregate
IDUA	NM_000203.5(IDUA):c.1091C>T (p.Thr364Met)	Pathogenic	2	1	Domain-aggregate
IDUA	NM_000203.5(IDUA):c.614G>A (p.Cys205Tyr)	Likely Pathogenic	2	2	Domain-aggregate
IDUA	NM_000203.5(IDUA):c.713T>A (p.Leu238Gln)	Pathogenic	2	2	Domain-aggregate
IDUA	NM_000203.5(IDUA):c.266G>A (p.Arg89Gln)	Pathogenic	2	1	Domain-aggregate
IDUA	NM_000203.5(IDUA):c.1090A>G (p.Thr364Ala)	Uncertain Significance	2	1	Domain-aggregate
IDUA	NM_000203.5(IDUA):c.1148G>A (p.Arg383His)	Pathogenic	2	0	Domain-aggregate
IDUA	NM_000203.5(IDUA):c.1487C>G (p.Pro496Arg)	Likely Pathogenic	1	2	Domain-aggregate
IDUA	NM_000203.5(IDUA):c.53T>C (p.Leu18Pro)	Likely Pathogenic	0	-3	Domain-aggregate
IDUA	NM_000203.5(IDUA):c.539G>C (p.Trp180Ser)	Likely Pathogenic	2	2	Domain-aggregate
IDUA	NM_000203.5(IDUA):c.670T>C (p.Ser224Pro)	Uncertain Significance	1	0	Domain-aggregate
IDUA	NM_000203.5(IDUA):c.956C>T (p.Ala319Val)	Likely Pathogenic	2	1	Domain-aggregate
IDUA	NM_000203.5(IDUA):c.1577T>C (p.Leu526Pro)	Uncertain Significance	2	0	Domain-aggregate
IDUA	NM_000203.5(IDUA):c.1603C>T (p.Leu535Phe)	Uncertain Significance	0	0	Domain-aggregate
IDUA	NM_000203.5(IDUA):c.1861C>G (p.Arg621Gly)	Uncertain Significance	1	0	Domain-aggregate
IDUA	NM_000203.5(IDUA):c.1163C>G (p.Thr388Arg)	Likely Pathogenic	2	1	Domain-aggregate
IDUA	NM_000203.5(IDUA):c.1898C>G (p.Ser633Trp)	Likely Pathogenic	2	3	Domain-aggregate
IDUA	NM_000203.5(IDUA):c.1139A>G (p.Gln380Arg)	Pathogenic	2	1	Domain-aggregate
IDUA	NM_000203.5(IDUA):c.623G>A (p.Gly208Asp)	Pathogenic	2	2	Domain-aggregate
RAG2	NM_000536.4(RAG2):c.104G>C (p.Gly35Ala)	Pathogenic	0	2	Domain-aggregate
RAG2	NM_000536.4(RAG2):c.14T>A (p.Met5Lys)	Uncertain Significance	0	-1	Domain-aggregate
RAG2	NM_000536.4(RAG2):c.68A>G (p.Asn23Ser)	Uncertain Significance	0	-2	Domain-aggregate
RAG2	NM_000536.4(RAG2):c.1247G>T (p.Trp416Leu)	Likely Pathogenic	0	1	Domain-aggregate
RAG2	NM_000536.4(RAG2):c.686G>A (p.Arg229Gln)	Pathogenic	0	1	Domain-aggregate
RAG2	NM_000536.4(RAG2):c.217C>T (p.Arg73Cys)	Likely Pathogenic	0	1	Domain-aggregate
RAG2	NM_000536.4(RAG2):c.501A>C (p.Arg167Ser)	Uncertain Significance	0	3	Domain-aggregate
RAG2	NM_000536.4(RAG2):c.53G>T (p.Gly18Val)	Uncertain Significance	0	3	Domain-aggregate
RAG2	NM_000536.4(RAG2):c.77G>C (p.Gly26Ala)	Uncertain Significance	0	0	Domain-aggregate
RAG2	NM_000536.4(RAG2):c.19A>G (p.Thr7Ala)	Uncertain Significance	0	-3	Domain-aggregate
RAG2	NM_000536.4(RAG2):c.1332C>G (p.Ile444Met)	Likely Pathogenic	0	0	Domain-aggregate
RAG2	NM_000536.4(RAG2):c.1309G>A (p.Glu437Lys)	Likely Pathogenic	0	1	Domain-aggregate
RAG2	NM_000536.4(RAG2):c.115A>G (p.Arg39Gly)	Pathogenic	0	3	Domain-aggregate
RAG2	NM_000536.4(RAG2):c.878A>G (p.Glu293Gly)	Benign	0	-2	Domain-aggregate
RAG2	NM_000536.4(RAG2):c.909G>T (p.Glu303Asp)	Uncertain Significance	0	-2	Domain-aggregate
RAG2	NM_000536.4(RAG2):c.685C>T (p.Arg229Trp)	Pathogenic	0	1	Domain-aggregate
RAG2	NM_000536.4(RAG2):c.1396C>T (p.Leu466Phe)	Likely Pathogenic	0	1	Domain-aggregate
RAG2	NM_000536.4(RAG2):c.1352G>C (p.Gly451Ala)	Pathogenic	0	-1	Domain-aggregate
RAG2	NM_000536.4(RAG2):c.13A>T (p.Met5Leu)	Uncertain Significance	0	-2	Domain-aggregate
RAG2	NM_000536.4(RAG2):c.644C>T (p.Thr215Ile)	Benign	0	-1	Domain-aggregate
RAG2	NM_000536.4(RAG2):c.1357T>A (p.Trp453Arg)	Likely Pathogenic	0	2	Domain-aggregate
RAG2	NM_000536.4(RAG2):c.283G>A (p.Gly95Arg)	Likely Pathogenic	0	3	Domain-aggregate
RAG2	NM_000536.4(RAG2):c.22G>A (p.Val8Ile)	Likely Benign	0	-3	Domain-aggregate
RAG2	NM_000536.4(RAG2):c.193G>T (p.Asp65Tyr)	Likely Pathogenic	0	0	Domain-aggregate
RAG2	NM_000536.4(RAG2):c.35T>C (p.Ile12Thr)	Uncertain Significance	0	-3	Domain-aggregate
RAG2	NM_000536.4(RAG2):c.328A>C (p.Met110Leu)	Uncertain Significance	0	-1	Domain-aggregate
RAG2	NM_000536.4(RAG2):c.302A>G (p.Asn101Ser)	Uncertain Significance	0	-1	Domain-aggregate
RAG2	NM_000536.4(RAG2):c.25A>G (p.Ser9Gly)	Uncertain Significance	0	-4	Domain-aggregate
RAG2	NM_000536.4(RAG2):c.74A>G (p.Asp25Gly)	Uncertain Significance	0	-3	Domain-aggregate
RAG2	NM_000536.4(RAG2):c.95G>T (p.Gly32Val)	Uncertain Significance	0	4	Domain-aggregate
RAG2	NM_000536.4(RAG2):c.1421A>G (p.Asn474Ser)	Uncertain Significance	0	-3	Domain-aggregate
RAG2	NM_000536.4(RAG2):c.1338C>G (p.Cys446Trp)	Likely Pathogenic	0	2	Domain-aggregate
HNF4A	NM_175914.5(HNF4A):c.1052T>G (p.Met351Arg)	Likely Pathogenic	1	2	Domain-aggregate
HNF4A	NM_175914.5(HNF4A):c.1309C>A (p.Pro437Thr)	Uncertain Significance	-1	-1	Domain-aggregate
HNF4A	NM_175914.5(HNF4A):c.553G>C (p.Ala185Pro)	Uncertain Significance	0	-3	Domain-aggregate
HNF4A	NM_175914.5(HNF4A):c.593T>G (p.Leu198Arg)	Uncertain Significance	1	2	Domain-aggregate
HNF4A	NM_175914.5(HNF4A):c.1267C>T (p.Pro423Ser)	Uncertain Significance	-1	-3	Domain-aggregate
HNF4A	NM_175914.5(HNF4A):c.724G>A (p.Val242Met)	Benign	1	-3	Domain-aggregate
FOXN1	NM_001369369.1(FOXN1):c.1184C>T (p.Pro395Leu)	Likely Benign	-1	-2	Domain-aggregate
FOXN1	NM_001369369.1(FOXN1):c.361G>A (p.Ala121Thr)	Uncertain Significance	-1	-3	Domain-aggregate
FOXN1	NM_001369369.1(FOXN1):c.713G>A (p.Gly238Asp)	Likely Benign	0	0	Domain-aggregate
FOXN1	NM_001369369.1(FOXN1):c.880G>C (p.Val294Leu)	Likely Pathogenic	1	1	Domain-aggregate
FOXN1	NM_001369369.1(FOXN1):c.974T>C (p.Leu325Pro)	Likely Pathogenic	2	2	Domain-aggregate
FOXN1	NM_001369369.1(FOXN1):c.962A>G (p.His321Arg)	Likely Pathogenic	2	2	Domain-aggregate
FOXN1	NM_001369369.1(FOXN1):c.362C>T (p.Ala121Val)	Likely Benign	-1	-4	Domain-aggregate
FOXN1	NM_001369369.1(FOXN1):c.1036T>C (p.Trp346Arg)	Uncertain Significance	2	4	Domain-aggregate
FOXN1	NM_001369369.1(FOXN1):c.1049C>T (p.Pro350Leu)	Likely Pathogenic	1	-1	Domain-aggregate
FOXN1	NM_001369369.1(FOXN1):c.1886C>T (p.Thr629Met)	Likely Benign	-1	-2	Domain-aggregate
FOXN1	NM_001369369.1(FOXN1):c.1664C>T (p.Ala555Val)	Likely Benign	-1	-1	Domain-aggregate
FOXN1	NM_001369369.1(FOXN1):c.1556T>A (p.Leu519Gln)	Benign	0	-1	Domain-aggregate
FOXN1	NM_001369369.1(FOXN1):c.1021C>T (p.Arg341Cys)	Uncertain Significance	1	0	Domain-aggregate
FOXN1	NM_001369369.1(FOXN1):c.1706C>A (p.Ser569Tyr)	Likely Benign	0	-1	Domain-aggregate
FOXN1	NM_001369369.1(FOXN1):c.1757G>A (p.Cys586Tyr)	Likely Benign	0	0	Domain-aggregate
FOXN1	NM_001369369.1(FOXN1):c.814C>A (p.Pro272Thr)	Likely Pathogenic	2	1	Domain-aggregate
FOXN1	NM_001369369.1(FOXN1):c.965A>G (p.Asn322Ser)	Likely Pathogenic	2	0	Domain-aggregate
FOXN1	NM_001369369.1(FOXN1):c.961C>A (p.His321Asn)	Likely Pathogenic	1	2	Domain-aggregate
PDHA1	NM_000284.4(PDHA1):c.999A>C (p.Glu333Asp)	Benign	0	-3	Domain-aggregate
PDHA1	NM_000284.4(PDHA1):c.506C>T (p.Ala169Val)	Pathogenic	1	2	Domain-aggregate
PDHA1	NM_000284.3(PDHA1):c.1132C>T (p.Arg378Cys)	Pathogenic	1	3	Domain-aggregate
PDHA1	NM_000284.4(PDHA1):c.214C>T (p.Arg72Cys)	Likely Pathogenic	1	2	Domain-aggregate
PDHA1	NM_000284.4(PDHA1):c.844A>C (p.Met282Leu)	Benign	0	-4	Domain-aggregate
PDHA1	NM_000284.4(PDHA1):c.839T>G (p.Ile280Ser)	Uncertain Significance	1	1	Domain-aggregate
KRAS	NM_004985.4(KRAS):c.101C>T (p.Pro34Leu)	Pathogenic	1	1	Domain-aggregate
KRAS	NM_033360.4(KRAS):c.15A>T (p.Lys5Asn)	Pathogenic	1	1	Domain-aggregate
KRAS	NM_004985.5(KRAS):c.40G>A (p.Val14Ile)	Pathogenic	1	0	Domain-aggregate
KRAS	NM_004985.4(KRAS):c.173C>T (p.Thr58Ile)	Pathogenic	1	1	Domain-aggregate
KRAS	NM_033360.4(KRAS):c.194G>T (p.Ser65Ile)	Likely Pathogenic	0	1	Domain-aggregate
KRAS	NM_004985.5(KRAS):c.65A>G (p.Gln22Arg)	Pathogenic	1	0	Domain-aggregate
DNM2	NM_001005361.3(DNM2):c.1856C>T (p.Ser619Leu)	Pathogenic	1	1	Domain-aggregate
DNM2	NM_001005361.3(DNM2):c.2414C>T (p.Ser805Leu)	Benign	-1	-2	Domain-aggregate
DNM2	NM_001005361.3(DNM2):c.1106G>A (p.Arg369Gln)	Pathogenic	1	0	Domain-aggregate
DNM2	NM_001005361.3(DNM2):c.1948G>A (p.Glu650Lys)	Likely Pathogenic	0	1	Domain-aggregate
DNM2	NM_001005361.3(DNM2):c.643G>A (p.Asp215Asn)	Benign	0	-2	Domain-aggregate
DNM2	NM_001005361.3(DNM2):c.1852G>A (p.Ala618Thr)	Pathogenic	1	1	Domain-aggregate
DNM2	NM_001005361.3(DNM2):c.1393C>T (p.Arg465Trp)	Pathogenic	1	0	Domain-aggregate
DNM2	NM_001005361.3(DNM2):c.8A>G (p.Asn3Ser)	Benign	0	0	Domain-aggregate
DNM2	NM_001005361.3(DNM2):c.1105C>T (p.Arg369Trp)	Pathogenic	0	1	Domain-aggregate
DNM2	NM_001005361.3(DNM2):c.1102G>A (p.Glu368Lys)	Pathogenic	1	1	Domain-aggregate
DNM2	NM_001005361.3(DNM2):c.1567A>G (p.Arg523Gly)	Likely Pathogenic	1	0	Domain-aggregate
DNM2	NM_001005361.3(DNM2):c.1678G>A (p.Glu560Lys)	Likely Pathogenic	0	1	Domain-aggregate
DNM2	NM_001005361.3(DNM2):c.1564C>T (p.Arg522Cys)	Likely Pathogenic	1	1	Domain-aggregate
DNM2	NM_001005361.3(DNM2):c.1840G>A (p.Asp614Asn)	Likely Pathogenic	0	1	Domain-aggregate
DNM2	NM_001005361.3(DNM2):c.1565G>A (p.Arg522His)	Pathogenic	1	0	Domain-aggregate
SGCB	NM_000232.5(SGCB):c.265G>A (p.Val89Met)	Likely Pathogenic	1	1	Domain-aggregate
SGCB	NM_000232.5(SGCB):c.92G>T (p.Ser31Ile)	Benign	0	-2	Domain-aggregate
SGCB	NM_000232.5(SGCB):c.452C>G (p.Thr151Arg)	Pathogenic	1	1	Domain-aggregate
SGCB	NM_000232.5(SGCB):c.271C>T (p.Arg91Cys)	Pathogenic	1	1	Domain-aggregate
SGCB	NM_000232.5(SGCB):c.799C>T (p.Arg267Cys)	Benign	1	0	Domain-aggregate
KCNQ1	NM_000218.3(KCNQ1):c.296C>G (p.Pro99Arg)	Uncertain Significance	1	-1	Domain-aggregate
KCNQ1	NM_000218.3(KCNQ1):c.1343C>G (p.Pro448Arg)	Benign	0	-3	Domain-aggregate
KCNQ1	NM_000218.3(KCNQ1):c.1120C>T (p.Leu374Phe)	Uncertain Significance	1	4	Domain-aggregate
KCNQ1	NM_000218.3(KCNQ1):c.817C>T (p.Leu273Phe)	Likely Pathogenic	1	2	Domain-aggregate
KCNQ1	NM_000218.3(KCNQ1):c.458C>T (p.Thr153Met)	Likely Benign	0	-4	Domain-aggregate
KCNQ1	NM_000218.3(KCNQ1):c.1927G>A (p.Gly643Ser)	Benign	0	-3	Domain-aggregate
KCNQ1	NM_000218.3(KCNQ1):c.860C>A (p.Ala287Glu)	Uncertain Significance	1	-3	Domain-aggregate
KCNQ1	NM_000218.3(KCNQ1):c.674C>T (p.Ser225Leu)	Likely Pathogenic	1	1	Domain-aggregate
KCNQ1	NM_000218.3(KCNQ1):c.514G>A (p.Val172Met)	Benign	0	-4	Domain-aggregate
KCNQ1	NM_000218.3(KCNQ1):c.1343C>T (p.Pro448Leu)	Uncertain Significance	0	-3	Domain-aggregate
KCNQ1	NM_000218.3(KCNQ1):c.817C>G (p.Leu273Val)	Uncertain Significance	1	1	Domain-aggregate
KCNQ1	NM_000218.3(KCNQ1):c.590C>T (p.Pro197Leu)	Uncertain Significance	1	2	Domain-aggregate
KCNQ1	NM_000218.3(KCNQ1):c.1252G>A (p.Val418Ile)	Likely Benign	0	-3	Domain-aggregate
KCNQ1	NM_000218.3(KCNQ1):c.958C>T (p.Pro320Ser)	Uncertain Significance	1	2	Domain-aggregate
KCNQ1	NM_000218.3(KCNQ1):c.217C>A (p.Pro73Thr)	Uncertain Significance	0	-3	Domain-aggregate
KCNQ1	NM_000218.3(KCNQ1):c.1096C>T (p.Arg366Trp)	Likely Pathogenic	1	4	Domain-aggregate
KCNQ1	NM_000218.3(KCNQ1):c.898G>A (p.Ala300Thr)	Uncertain Significance	1	1	Domain-aggregate
KCNQ1	NM_000218.3(KCNQ1):c.1766G>A (p.Gly589Asp)	Pathogenic	1	1	Domain-aggregate
KCNQ1	NM_000218.3(KCNQ1):c.760G>A (p.Val254Met)	Pathogenic	1	2	Domain-aggregate
GCK	NM_000162.5(GCK):c.54G>T (p.Gln18His)	Uncertain Significance	0	-1	Domain-aggregate
GCK	NM_000162.5(GCK):c.232G>T (p.Asp78Tyr)	Pathogenic	1	1	Domain-aggregate
GCK	NM_000162.5(GCK):c.1124C>T (p.Ser375Phe)	Likely Pathogenic	1	1	Domain-aggregate
GCK	NM_000162.5(GCK):c.898G>C (p.Glu300Gln)	Pathogenic	1	1	Domain-aggregate
GCK	NM_000162.5(GCK):c.1228G>C (p.Gly410Arg)	Pathogenic	1	1	Domain-aggregate
GCK	NM_000162.5(GCK):c.1169T>C (p.Ile390Thr)	Uncertain Significance	1	1	Domain-aggregate
GCK	NM_000162.5(GCK):c.1156C>G (p.Leu386Val)	Pathogenic	1	-1	Domain-aggregate
GCK	NM_000162.5(GCK):c.572G>A (p.Arg191Gln)	Pathogenic	1	0	Domain-aggregate
GCK	NM_000162.5(GCK):c.463A>G (p.Arg155Gly)	Uncertain Significance	1	0	Domain-aggregate
GCK	NM_000162.5(GCK):c.364C>G (p.Leu122Val)	Likely Pathogenic	1	0	Domain-aggregate
GCK	NM_000162.5(GCK):c.1148C>T (p.Ser383Leu)	Pathogenic	1	1	Domain-aggregate
GCK	NM_000162.5(GCK):c.389T>C (p.Ile130Thr)	Likely Pathogenic	1	1	Domain-aggregate
GCK	NM_000162.5(GCK):c.629T>C (p.Met210Thr)	Pathogenic	1	1	Domain-aggregate
GCK	NM_000162.5(GCK):c.322T>C (p.Tyr108His)	Pathogenic	1	1	Domain-aggregate
GCK	NM_000162.5(GCK):c.1270C>T (p.His424Tyr)	Likely Pathogenic	1	-1	Domain-aggregate
GCK	NM_000162.5(GCK):c.824G>A (p.Arg275His)	Uncertain Significance	0	-2	Domain-aggregate
GCK	NM_000162.5(GCK):c.1129C>A (p.Arg377Ser)	Likely Pathogenic	1	1	Domain-aggregate
GCK	NM_000162.5(GCK):c.1386G>T (p.Met462Ile)	Likely Benign	0	-1	Domain-aggregate
GCK	NM_000162.5(GCK):c.214G>A (p.Gly72Arg)	Pathogenic	1	1	Domain-aggregate
GCK	NM_000162.5(GCK):c.146C>A (p.Thr49Asn)	Likely Pathogenic	0	-1	Domain-aggregate
GCK	NM_000162.5(GCK):c.775G>A (p.Ala259Thr)	Pathogenic	1	0	Domain-aggregate
GCK	NM_000162.5(GCK):c.911T>C (p.Leu304Pro)	Pathogenic	1	1	Domain-aggregate
GCK	NM_000162.5(GCK):c.1099G>A (p.Val367Met)	Pathogenic	1	0	Domain-aggregate
GCK	NM_000162.5(GCK):c.1113C>G (p.Cys371Trp)	Likely Pathogenic	1	1	Domain-aggregate
GCK	NM_000162.5(GCK):c.1130G>A (p.Arg377His)	Likely Pathogenic	1	1	Domain-aggregate
GCK	NM_000162.5(GCK):c.608T>C (p.Val203Ala)	Pathogenic	1	1	Domain-aggregate
GCK	NM_000162.5(GCK):c.118G>A (p.Glu40Lys)	Pathogenic	1	1	Domain-aggregate
GCK	NM_000162.5(GCK):c.185T>C (p.Val62Ala)	Pathogenic	1	1	Domain-aggregate
GCK	NM_000162.5(GCK):c.1229G>A (p.Gly410Asp)	Pathogenic	1	1	Domain-aggregate
GCK	NM_000162.5(GCK):c.1235T>G (p.Val412Gly)	Pathogenic	1	1	Domain-aggregate
GCK	NM_000162.5(GCK):c.1147T>C (p.Ser383Pro)	Likely Pathogenic	1	1	Domain-aggregate
GCK	NM_000162.5(GCK):c.377T>C (p.Ile126Thr)	Uncertain Significance	1	1	Domain-aggregate
GCK	NM_000162.5(GCK):c.1024A>C (p.Thr342Pro)	Benign	0	-2	Domain-aggregate
GCK	NM_000162.5(GCK):c.322T>G (p.Tyr108Asp)	Uncertain Significance	1	1	Domain-aggregate
GCK	NM_000162.5(GCK):c.203G>A (p.Gly68Asp)	Likely Benign	1	1	Domain-aggregate
GCK	NM_000162.5(GCK):c.736G>A (p.Gly246Arg)	Pathogenic	1	0	Domain-aggregate
GCK	NM_000162.5(GCK):c.688T>C (p.Cys230Arg)	Likely Pathogenic	1	1	Domain-aggregate
GCK	NM_000162.5(GCK):c.349G>C (p.Gly117Arg)	Likely Pathogenic	1	1	Domain-aggregate
GCK	NM_000162.5(GCK):c.823C>T (p.Arg275Cys)	Pathogenic	1	-1	Domain-aggregate
GCK	NM_000162.5(GCK):c.1142T>A (p.Met381Lys)	Likely Pathogenic	1	1	Domain-aggregate
GCK	NM_000162.5(GCK):c.676G>A (p.Val226Met)	Pathogenic	1	0	Domain-aggregate
GCK	NM_000162.5(GCK):c.781G>C (p.Gly261Arg)	Pathogenic	1	1	Domain-aggregate
GCK	NM_000162.5(GCK):c.1129C>T (p.Arg377Cys)	Pathogenic	1	1	Domain-aggregate
GCK	NM_000162.5(GCK):c.1133C>G (p.Ala378Gly)	Likely Pathogenic	1	-1	Domain-aggregate
GCK	NM_000162.5(GCK):c.523G>A (p.Gly175Arg)	Pathogenic	1	0	Domain-aggregate
GCK	NM_000162.5(GCK):c.571C>T (p.Arg191Trp)	Pathogenic	1	1	Domain-aggregate
GCK	NM_000162.5(GCK):c.1145G>A (p.Cys382Tyr)	Pathogenic	1	1	Domain-aggregate
GCK	NM_000162.5(GCK):c.824G>T (p.Arg275Leu)	Likely Pathogenic	1	-1	Domain-aggregate
GCK	NM_000162.5(GCK):c.142G>A (p.Glu48Lys)	Likely Benign	0	-2	Domain-aggregate
GCK	NM_000162.5(GCK):c.898G>A (p.Glu300Lys)	Likely Pathogenic	1	1	Domain-aggregate
GCK	NM_000162.5(GCK):c.1307T>A (p.Ile436Asn)	Pathogenic	1	1	Domain-aggregate
GCK	NM_000162.5(GCK):c.1280T>G (p.Val427Gly)	Uncertain Significance	1	0	Domain-aggregate
GCK	NM_000162.5(GCK):c.1268T>C (p.Phe423Ser)	Uncertain Significance	1	1	Domain-aggregate
GCK	NM_000162.5(GCK):c.1136C>G (p.Ala379Gly)	Likely Pathogenic	1	0	Domain-aggregate
GCK	NM_000162.5(GCK):c.449T>C (p.Phe150Ser)	Pathogenic	1	1	Domain-aggregate
GCK	NM_000162.5(GCK):c.113A>C (p.Gln38Pro)	Pathogenic	1	1	Domain-aggregate
GCK	NM_000162.5(GCK):c.364C>A (p.Leu122Ile)	Likely Pathogenic	1	0	Domain-aggregate
GCK	NM_000162.5(GCK):c.1017G>C (p.Glu339Asp)	Uncertain Significance	1	1	Domain-aggregate
GCK	NM_000162.5(GCK):c.682A>G (p.Thr228Ala)	Pathogenic	1	1	Domain-aggregate
GCK	NM_000162.5(GCK):c.524G>T (p.Gly175Val)	Uncertain Significance	1	1	Domain-aggregate
GCK	NM_000162.5(GCK):c.604A>G (p.Met202Val)	Uncertain Significance	0	-2	Domain-aggregate
GCK	NM_000162.5(GCK):c.737G>A (p.Gly246Glu)	Likely Pathogenic	1	0	Domain-aggregate
GCK	NM_000162.5(GCK):c.623C>T (p.Ala208Val)	Pathogenic	1	1	Domain-aggregate
GCK	NM_000162.5(GCK):c.449T>A (p.Phe150Tyr)	Pathogenic	1	1	Domain-aggregate
GCK	NM_000162.5(GCK):c.1120G>A (p.Val374Met)	Likely Pathogenic	1	1	Domain-aggregate
GCK	NM_000162.5(GCK):c.370G>A (p.Asp124Asn)	Pathogenic	1	0	Domain-aggregate
GCK	NM_000162.5(GCK):c.802G>A (p.Glu268Lys)	Pathogenic	1	-1	Domain-aggregate
GCK	NM_000162.5(GCK):c.442T>A (p.Phe148Ile)	Uncertain Significance	1	1	Domain-aggregate
GCK	NM_000162.5(GCK):c.184G>A (p.Val62Met)	Pathogenic	1	1	Domain-aggregate
GCK	NM_000162.5(GCK):c.127C>T (p.Arg43Cys)	Pathogenic	1	-1	Domain-aggregate
GCK	NM_000162.5(GCK):c.776C>T (p.Ala259Val)	Pathogenic	1	1	Domain-aggregate
GCK	NM_000162.5(GCK):c.1175G>T (p.Arg392Leu)	Pathogenic	0	0	Domain-aggregate
GCK	NM_000162.5(GCK):c.1169T>A (p.Ile390Asn)	Uncertain Significance	1	1	Domain-aggregate
GCK	NM_000162.5(GCK):c.1157T>C (p.Leu386Pro)	Pathogenic	1	1	Domain-aggregate
GCK	NM_000162.5(GCK):c.1289T>C (p.Leu430Pro)	Uncertain Significance	1	1	Domain-aggregate
GCK	NM_000162.5(GCK):c.1268T>A (p.Phe423Tyr)	Pathogenic	1	0	Domain-aggregate
GCK	NM_000162.5(GCK):c.455T>C (p.Phe152Ser)	Pathogenic	1	1	Domain-aggregate
GCK	NM_000162.5(GCK):c.1361C>A (p.Ala454Glu)	Likely Pathogenic	1	1	Domain-aggregate
GCK	NM_000162.5(GCK):c.371A>T (p.Asp124Val)	Uncertain Significance	1	1	Domain-aggregate
GCK	NM_000162.5(GCK):c.683C>T (p.Thr228Met)	Pathogenic	1	1	Domain-aggregate
GCK	NM_000162.5(GCK):c.524G>C (p.Gly175Ala)	Uncertain Significance	1	0	Domain-aggregate
GCK	NM_000162.5(GCK):c.524G>A (p.Gly175Glu)	Likely Pathogenic	1	0	Domain-aggregate
GCK	NM_000162.5(GCK):c.1310C>T (p.Thr437Ile)	Likely Pathogenic	1	-1	Domain-aggregate
GCK	NM_000162.5(GCK):c.1042A>T (p.Ile348Phe)	Likely Pathogenic	1	0	Domain-aggregate
GCK	NM_000162.5(GCK):c.167A>C (p.Lys56Thr)	Likely Pathogenic	1	1	Domain-aggregate
GCK	NM_000162.5(GCK):c.10G>A (p.Asp4Asn)	Likely Benign	0	-1	Domain-aggregate
GCK	NM_000162.5(GCK):c.503C>T (p.Thr168Ile)	Pathogenic	1	1	Domain-aggregate
GCK	NM_000162.5(GCK):c.748C>T (p.Arg250Cys)	Pathogenic	1	-1	Domain-aggregate
GCK	NM_000162.5(GCK):c.749G>A (p.Arg250His)	Likely Pathogenic	1	-1	Domain-aggregate
GCK	NM_000162.5(GCK):c.677T>C (p.Val226Ala)	Likely Pathogenic	1	0	Domain-aggregate
GCK	NM_000162.5(GCK):c.1255T>C (p.Phe419Leu)	Uncertain Significance	1	1	Domain-aggregate
GCK	NM_000162.5(GCK):c.1174C>G (p.Arg392Gly)	Uncertain Significance	1	0	Domain-aggregate
GCK	NM_000162.5(GCK):c.781G>A (p.Gly261Arg)	Pathogenic	1	1	Domain-aggregate
GCK	NM_000162.5(GCK):c.1133C>T (p.Ala378Val)	Pathogenic	1	1	Domain-aggregate
GCK	NM_000162.5(GCK):c.1136C>A (p.Ala379Glu)	Likely Pathogenic	1	1	Domain-aggregate
GCK	NM_000162.5(GCK):c.1174C>T (p.Arg392Cys)	Pathogenic	1	0	Domain-aggregate
GCK	NM_000162.5(GCK):c.952G>A (p.Gly318Arg)	Pathogenic	1	0	Domain-aggregate
GCK	NM_000162.5(GCK):c.1030G>T (p.Asp344Tyr)	Likely Pathogenic	1	-1	Domain-aggregate
GCK	NM_000162.5(GCK):c.1345G>A (p.Ala449Thr)	Pathogenic	1	0	Domain-aggregate
GCK	NM_000162.5(GCK):c.457C>T (p.Pro153Ser)	Likely Pathogenic	1	1	Domain-aggregate
GCK	NM_000162.5(GCK):c.464G>C (p.Arg155Thr)	Likely Pathogenic	1	-1	Domain-aggregate
GCK	NM_000162.5(GCK):c.454T>C (p.Phe152Leu)	Pathogenic	1	1	Domain-aggregate
GCK	NM_000162.5(GCK):c.370G>C (p.Asp124His)	Pathogenic	1	1	Domain-aggregate
GCK	NM_000162.5(GCK):c.1160C>T (p.Ala387Val)	Pathogenic	1	0	Domain-aggregate
GCK	NM_000162.5(GCK):c.1160C>A (p.Ala387Glu)	Likely Pathogenic	1	1	Domain-aggregate
GCK	NM_000162.5(GCK):c.601G>T (p.Ala201Ser)	Pathogenic	0	-1	Domain-aggregate
GCK	NM_000162.5(GCK):c.630G>T (p.Met210Ile)	Pathogenic	1	1	Domain-aggregate
GCK	NM_000162.5(GCK):c.1163G>A (p.Gly388Asp)	Pathogenic	1	1	Domain-aggregate
GCK	NM_000162.5(GCK):c.658T>C (p.Cys220Arg)	Likely Pathogenic	1	4	Domain-aggregate
GCK	NM_000162.5(GCK):c.605T>C (p.Met202Thr)	Pathogenic	1	1	Domain-aggregate
GCK	NM_000162.5(GCK):c.1130G>T (p.Arg377Leu)	Likely Pathogenic	1	1	Domain-aggregate
GCK	NM_000162.5(GCK):c.790G>A (p.Gly264Ser)	Pathogenic	1	-1	Domain-aggregate
GCK	NM_000162.5(GCK):c.106C>T (p.Arg36Trp)	Likely Pathogenic	1	0	Domain-aggregate
GCK	NM_000162.5(GCK):c.1139A>C (p.His380Pro)	Pathogenic	1	1	Domain-aggregate
GCK	NM_000162.5(GCK):c.1190G>A (p.Arg397His)	Likely Pathogenic	1	-1	Domain-aggregate
GCK	NM_000162.5(GCK):c.128G>A (p.Arg43His)	Pathogenic	1	-2	Domain-aggregate
GCK	NM_000162.5(GCK):c.649G>A (p.Asp217Asn)	Benign	0	0	Domain-aggregate
GCK	NM_000162.5(GCK):c.437T>C (p.Leu146Pro)	Pathogenic	1	1	Domain-aggregate
GCK	NM_000162.5(GCK):c.883G>A (p.Gly295Ser)	Likely Pathogenic	1	1	Domain-aggregate
GCK	NM_000162.5(GCK):c.1112G>T (p.Cys371Phe)	Pathogenic	1	1	Domain-aggregate
GCK	NM_000162.5(GCK):c.1132G>A (p.Ala378Thr)	Pathogenic	1	0	Domain-aggregate
GCK	NM_000162.5(GCK):c.410A>G (p.His137Arg)	Likely Pathogenic	0	-1	Domain-aggregate
GCK	NM_000162.5(GCK):c.1181G>T (p.Arg394Leu)	Likely Pathogenic	1	0	Domain-aggregate
GCK	NM_000162.5(GCK):c.566T>C (p.Ile189Thr)	Pathogenic	1	1	Domain-aggregate
GCK	NM_000162.5(GCK):c.374A>G (p.Tyr125Cys)	Uncertain Significance	1	0	Domain-aggregate
GCK	NM_000162.5(GCK):c.1153G>A (p.Gly385Arg)	Likely Pathogenic	1	1	Domain-aggregate
GCK	NM_000162.5(GCK):c.1150G>C (p.Ala384Pro)	Uncertain Significance	1	1	Domain-aggregate
GCK	NM_000162.5(GCK):c.626C>T (p.Thr209Met)	Pathogenic	1	1	Domain-aggregate
GCK	NM_000162.5(GCK):c.787T>C (p.Ser263Pro)	Pathogenic	0	0	Domain-aggregate
GCK	NM_000162.5(GCK):c.629T>A (p.Met210Lys)	Pathogenic	1	1	Domain-aggregate
GCK	NM_000162.5(GCK):c.1142T>G (p.Met381Arg)	Likely Pathogenic	1	1	Domain-aggregate
GCK	NM_000162.5(GCK):c.1190G>T (p.Arg397Leu)	Pathogenic	1	0	Domain-aggregate
GCK	NM_000162.5(GCK):c.1144T>C (p.Cys382Arg)	Pathogenic	1	1	Domain-aggregate
GCK	NM_000162.5(GCK):c.1240A>G (p.Lys414Glu)	Pathogenic	1	1	Domain-aggregate
GCK	NM_000162.5(GCK):c.1322C>T (p.Ser441Leu)	Uncertain Significance	1	1	Domain-aggregate
GCK	NM_000162.5(GCK):c.544G>A (p.Val182Met)	Pathogenic	1	1	Domain-aggregate
GCK	NM_000162.5(GCK):c.171G>A (p.Met57Ile)	Pathogenic	1	1	Domain-aggregate
GCK	NM_000162.5(GCK):c.171G>T (p.Met57Ile)	Likely Pathogenic	1	1	Domain-aggregate
GCK	NM_000162.5(GCK):c.1322C>G (p.Ser441Trp)	Pathogenic	1	1	Domain-aggregate
GCK	NM_000162.5(GCK):c.835G>C (p.Glu279Gln)	Benign	0	-2	Domain-aggregate
GCK	NM_000162.5(GCK):c.952G>T (p.Gly318Trp)	Uncertain Significance	1	1	Domain-aggregate
GCK	NM_000162.5(GCK):c.646G>A (p.Glu216Lys)	Uncertain Significance	1	-1	Domain-aggregate
GCK	NM_000162.5(GCK):c.1064T>C (p.Leu355Pro)	Uncertain Significance	1	1	Domain-aggregate
GCK	NM_000162.5(GCK):c.1087G>A (p.Asp363Asn)	Likely Pathogenic	1	1	Domain-aggregate
GCK	NM_000162.5(GCK):c.1181G>C (p.Arg394Pro)	Likely Pathogenic	1	1	Domain-aggregate
GCK	NM_000162.5(GCK):c.1154G>A (p.Gly385Glu)	Uncertain Significance	1	1	Domain-aggregate
GCK	NM_000162.5(GCK):c.950A>C (p.His317Pro)	Uncertain Significance	0	-1	Domain-aggregate
GCK	NM_000162.5(GCK):c.1151C>A (p.Ala384Glu)	Pathogenic	1	1	Domain-aggregate
GCK	NM_000162.5(GCK):c.1151C>T (p.Ala384Val)	Likely Pathogenic	1	0	Domain-aggregate
[truncated: 1,474 more rows]

## Sheet: MutPred2
HGNC Gene Symbol	Variation	ClinGen Classification	ClinGen Evidence Point	Hybrid Calibration Evidence Point	Calibration Approach
ATM	NM_000051.4(ATM):c.6116A>T (p.Glu2039Val)	Uncertain Significance	0	0	Gene-specific
ATM	NM_000051.4(ATM):c.8678C>A (p.Ala2893Asp)	Uncertain Significance	1	2	Gene-specific
ATM	NM_000051.4(ATM):c.5858C>T (p.Thr1953Ile)	Uncertain Significance	1	0	Gene-specific
ATM	NM_000051.4(ATM):c.8520G>C (p.Leu2840Phe)	Uncertain Significance	0	-2	Gene-specific
ATM	NM_000051.4(ATM):c.590G>A (p.Gly197Glu)	Uncertain Significance	0	1	Gene-specific
ATM	NM_000051.4(ATM):c.7661A>G (p.His2554Arg)	Uncertain Significance	1	0	Gene-specific
ATM	NM_000051.3(ATM):c.3284G>A (p.Arg1095Lys)	Likely Pathogenic	0	-1	Gene-specific
ATM	NM_000051.4(ATM):c.8480T>G (p.Phe2827Cys)	Likely Pathogenic	1	2	Gene-specific
ATM	NM_000051.4(ATM):c.4850T>C (p.Leu1617Pro)	Uncertain Significance	1	2	Gene-specific
ATM	NM_000051.4(ATM):c.4394T>C (p.Leu1465Pro)	Likely Pathogenic	1	2	Gene-specific
ATM	NM_000051.4(ATM):c.6530A>C (p.Gln2177Pro)	Uncertain Significance	1	1	Gene-specific
ATM	NM_000051.4(ATM):c.8494C>T (p.Arg2832Cys)	Likely Pathogenic	1	0	Gene-specific
ATM	NM_000051.4(ATM):c.2932T>C (p.Ser978Pro)	Benign	1	1	Gene-specific
ATM	NM_000051.3(ATM):c.2614C>T (p.Pro872Ser)	Benign	-1	-2	Gene-specific
ATM	NM_000051.3(ATM):c.8546G>C (p.Arg2849Pro)	Likely Pathogenic	1	2	Gene-specific
ATM	NM_000051.4(ATM):c.5236G>A (p.Gly1746Arg)	Pathogenic	0	0	Gene-specific
ATM	NM_000051.3(ATM):c.1073A>G (p.Asn358Ser)	Benign	-1	-2	Gene-specific
ATM	NM_000051.4(ATM):c.3137T>C (p.Leu1046Pro)	Likely Pathogenic	1	3	Gene-specific
ATM	NM_000051.3(ATM):c.6995T>C (p.Leu2332Pro)	Benign	-1	1	Gene-specific
ATM	NM_000051.4(ATM):c.3925G>A (p.Ala1309Thr)	Benign	-1	-2	Gene-specific
ATM	NM_000051.4(ATM):c.875C>T (p.Pro292Leu)	Likely Pathogenic	1	1	Gene-specific
ATM	NM_000051.4(ATM):c.8300T>C (p.Leu2767Pro)	Likely Pathogenic	1	2	Gene-specific
ATM	NM_000051.3(ATM):c.146C>G (p.Ser49Cys)	Benign	0	-1	Gene-specific
ATM	NM_000051.3(ATM):c.3118A>G (p.Met1040Val)	Benign	-1	-1	Gene-specific
ATM	NM_000051.3(ATM):c.7919C>G (p.Thr2640Ser)	Uncertain Significance	0	-2	Gene-specific
ATM	NM_000051.4(ATM):c.7355T>C (p.Leu2452Pro)	Likely Pathogenic	1	2	Gene-specific
ATM	NM_000051.4(ATM):c.9103C>T (p.Leu3035Phe)	Likely Pathogenic	1	1	Gene-specific
ATM	NM_000051.4(ATM):c.7271T>G (p.Val2424Gly)	Pathogenic	1	0	Gene-specific
BRCA1	NM_007294.4(BRCA1):c.3082C>T (p.Arg1028Cys)	Benign	0	-2	Gene-specific
BRCA1	NM_007294.4(BRCA1):c.1233T>G (p.Asp411Glu)	Benign	0	-3	Gene-specific
BRCA1	NM_007294.4(BRCA1):c.191G>A (p.Cys64Tyr)	Pathogenic	1	3	Gene-specific
BRCA1	NM_007294.4(BRCA1):c.305C>G (p.Ala102Gly)	Benign	0	-2	Gene-specific
BRCA1	NM_007294.4(BRCA1):c.3418A>G (p.Ser1140Gly)	Benign	0	-3	Gene-specific
BRCA1	NM_007294.4(BRCA1):c.5089T>C (p.Cys1697Arg)	Pathogenic	1	3	Gene-specific
BRCA1	NM_007294.4(BRCA1):c.2155A>G (p.Lys719Glu)	Benign	0	-2	Gene-specific
BRCA1	NM_007294.4(BRCA1):c.5090G>A (p.Cys1697Tyr)	Likely Pathogenic	1	3	Gene-specific
BRCA1	NM_007294.4(BRCA1):c.811G>A (p.Val271Met)	Benign	0	-3	Gene-specific
BRCA1	NM_007294.4(BRCA1):c.5140G>T (p.Val1714Phe)	Likely Pathogenic	1	1	Gene-specific
BRCA1	NM_007294.4(BRCA1):c.122A>T (p.His41Leu)	Likely Pathogenic	1	3	Gene-specific
BRCA1	NM_007294.4(BRCA1):c.5075A>T (p.Asp1692Val)	Likely Pathogenic	1	3	Gene-specific
BRCA1	NM_007294.4(BRCA1):c.5332G>A (p.Asp1778Asn)	Pathogenic	0	0	Gene-specific
BRCA1	NM_007294.4(BRCA1):c.5339T>G (p.Leu1780Arg)	Likely Pathogenic	1	3	Gene-specific
BRCA1	NM_007294.4(BRCA1):c.5257A>G (p.Arg1753Gly)	Likely Pathogenic	1	3	Gene-specific
BRCA1	NM_007294.4(BRCA1):c.121C>A (p.His41Asn)	Likely Pathogenic	1	2	Gene-specific
BRCA1	NM_007294.4(BRCA1):c.74C>T (p.Pro25Leu)	Likely Pathogenic	1	3	Gene-specific
BRCA1	NM_007294.4(BRCA1):c.4159T>C (p.Ser1387Pro)	Likely Benign	0	-1	Gene-specific
BRCA1	NM_007294.4(BRCA1):c.5252G>C (p.Arg1751Pro)	Likely Pathogenic	1	3	Gene-specific
BRCA1	NM_007294.4(BRCA1):c.5561T>C (p.Leu1854Pro)	Likely Pathogenic	1	1	Gene-specific
BRCA1	NM_007294.4(BRCA1):c.5282T>G (p.Phe1761Cys)	Likely Pathogenic	1	3	Gene-specific
BRCA1	NM_007294.4(BRCA1):c.5236C>G (p.His1746Asp)	Likely Pathogenic	1	3	Gene-specific
BRCA1	NM_007294.4(BRCA1):c.5242G>T (p.Gly1748Cys)	Likely Pathogenic	1	3	Gene-specific
BRCA1	NM_007294.4(BRCA1):c.5003T>C (p.Phe1668Ser)	Uncertain Significance	0	3	Gene-specific
BRCA1	NM_007294.4(BRCA1):c.5056C>T (p.His1686Tyr)	Likely Pathogenic	1	3	Gene-specific
BRCA1	NM_007294.4(BRCA1):c.5096G>C (p.Arg1699Pro)	Uncertain Significance	1	4	Gene-specific
BRCA1	NM_007294.4(BRCA1):c.4963T>C (p.Ser1655Pro)	Likely Pathogenic	1	3	Gene-specific
BRCA1	NM_007294.4(BRCA1):c.5200T>A (p.Phe1734Ile)	Likely Pathogenic	0	3	Gene-specific
BRCA1	NM_007294.4(BRCA1):c.5098A>G (p.Thr1700Ala)	Likely Pathogenic	1	0	Gene-specific
BRCA2	NM_000059.4(BRCA2):c.831T>G (p.Asn277Lys)	Benign	0	0	Gene-specific
BRCA2	NM_000059.4(BRCA2):c.9227G>T (p.Gly3076Val)	Pathogenic	1	4	Gene-specific
BRCA2	NM_000059.4(BRCA2):c.8023A>G (p.Ile2675Val)	Pathogenic	0	-2	Gene-specific
BRCA2	NM_000059.4(BRCA2):c.663T>G (p.Phe221Leu)	Likely Benign	0	-2	Gene-specific
BRCA2	NM_000059.4(BRCA2):c.8149G>T (p.Ala2717Ser)	Benign	-1	-2	Gene-specific
BRCA2	NM_000059.4(BRCA2):c.7796A>G (p.Glu2599Gly)	Likely Pathogenic	1	2	Gene-specific
BRCA2	NM_000059.4(BRCA2):c.2482T>C (p.Tyr828His)	Likely Benign	0	-2	Gene-specific
BRCA2	NM_000059.4(BRCA2):c.7759C>T (p.Leu2587Phe)	Benign	-1	0	Gene-specific
BRCA2	NM_000059.4(BRCA2):c.8059G>T (p.Val2687Phe)	Uncertain Significance	1	0	Gene-specific
BRCA2	NM_000059.4(BRCA2):c.9302T>C (p.Leu3101Pro)	Likely Pathogenic	1	4	Gene-specific
BRCA2	NM_000059.4(BRCA2):c.7970A>C (p.Lys2657Thr)	Uncertain Significance	0	1	Gene-specific
BRCA2	NM_000059.4(BRCA2):c.2471T>C (p.Leu824Ser)	Likely Benign	0	-1	Gene-specific
BRCA2	NM_000059.4(BRCA2):c.7787G>A (p.Gly2596Glu)	Likely Pathogenic	1	2	Gene-specific
BRCA2	NM_000059.4(BRCA2):c.8164A>G (p.Thr2722Ala)	Likely Pathogenic	1	1	Gene-specific
BRCA2	NM_000059.4(BRCA2):c.7857G>C (p.Trp2619Cys)	Likely Pathogenic	1	4	Gene-specific
BRCA2	NM_000059.4(BRCA2):c.8362T>C (p.Trp2788Arg)	Likely Pathogenic	1	3	Gene-specific
CDH23	NM_022124.6(CDH23):c.8083G>A (p.Asp2695Asn)	Uncertain Significance	1	0	Gene-specific
CDH23	NM_022124.6(CDH23):c.6614C>T (p.Pro2205Leu)	Uncertain Significance	0	-1	Gene-specific
CDH23	NM_022124.6(CDH23):c.478G>A (p.Asp160Asn)	Uncertain Significance	1	2	Gene-specific
CDH23	NM_022124.6(CDH23):c.4000C>T (p.Arg1334Trp)	Uncertain Significance	0	0	Gene-specific
CDH23	NM_022124.5(CDH23):c.3625A>G (p.Thr1209Ala)	Benign	-1	-4	Gene-specific
CDH23	NM_022124.6(CDH23):c.902G>A (p.Arg301Gln)	Uncertain Significance	0	0	Gene-specific
CDH23	NM_022124.6(CDH23):c.2263C>T (p.His755Tyr)	Benign	0	-4	Gene-specific
CDH23	NM_022124.6(CDH23):c.6866A>G (p.Asn2289Ser)	Uncertain Significance	1	-1	Gene-specific
CDH23	NM_022124.5(CDH23):c.719C>T (p.Pro240Leu)	Pathogenic	0	-4	Gene-specific
CDKL5	NM_001323289.2(CDKL5):c.1721C>T (p.Pro574Leu)	Benign	0	-4	Gene-specific
CDKL5	NM_001323289.2(CDKL5):c.761A>G (p.His254Arg)	Benign	0	-4	Gene-specific
CDKL5	NM_001323289.2(CDKL5):c.290T>C (p.Leu97Pro)	Likely Pathogenic	1	4	Gene-specific
CDKL5	NM_001323289.2(CDKL5):c.469G>C (p.Ala157Pro)	Likely Pathogenic	1	4	Gene-specific
CDKL5	NM_003159.2(CDKL5):c.1234A>G (p.Lys412Glu)	Likely Benign	-1	-4	Gene-specific
CDKL5	NM_001323289.2(CDKL5):c.2465G>A (p.Arg822His)	Likely Benign	-1	-4	Gene-specific
CDKL5	NM_001323289.2(CDKL5):c.239G>A (p.Arg80His)	Uncertain Significance	0	-4	Gene-specific
CDKL5	NM_001323289.2(CDKL5):c.2318A>G (p.Glu773Gly)	Likely Benign	0	-4	Gene-specific
CDKL5	NM_001323289.2(CDKL5):c.871T>C (p.Cys291Arg)	Uncertain Significance	0	3	Gene-specific
CDKL5	NM_001323289.2(CDKL5):c.2107C>G (p.Leu703Val)	Likely Benign	0	-4	Gene-specific
CDKL5	NM_001323289.2(CDKL5):c.1579C>T (p.Pro527Ser)	Likely Benign	0	-4	Gene-specific
CDKL5	NM_001323289.2(CDKL5):c.194G>A (p.Arg65Gln)	Likely Benign	0	-4	Gene-specific
CDKL5	NM_001323289.2(CDKL5):c.65G>A (p.Gly22Glu)	Likely Pathogenic	1	4	Gene-specific
CDKL5	NM_001323289.2(CDKL5):c.2546C>T (p.Ser849Leu)	Benign	0	-4	Gene-specific
CDKL5	NM_001323289.2(CDKL5):c.1523T>C (p.Ile508Thr)	Benign	-1	-4	Gene-specific
CDKL5	NM_003159.2(CDKL5):c.533G>A (p.Arg178Gln)	Pathogenic	0	4	Gene-specific
CDKL5	NM_003159.2(CDKL5):c.578A>G (p.Asp193Gly)	Likely Pathogenic	1	4	Gene-specific
CDKL5	NM_001323289.2(CDKL5):c.2086G>A (p.Ala696Thr)	Benign	-1	-4	Gene-specific
CDKL5	NM_001323289.2(CDKL5):c.470C>T (p.Ala157Val)	Likely Pathogenic	1	4	Gene-specific
CDKL5	NM_001323289.2(CDKL5):c.38T>C (p.Phe13Ser)	Likely Pathogenic	0	4	Gene-specific
CDKL5	NM_001323289.2(CDKL5):c.1892T>C (p.Ile631Thr)	Benign	0	-4	Gene-specific
CDKL5	NM_003159.2(CDKL5):c.119C>T (p.Ala40Val)	Pathogenic	1	4	Gene-specific
CDKL5	NM_001323289.2(CDKL5):c.1684A>G (p.Thr562Ala)	Likely Benign	-1	-4	Gene-specific
CDKL5	NM_001323289.2(CDKL5):c.454T>C (p.Cys152Arg)	Likely Pathogenic	1	4	Gene-specific
CDKL5	NM_001323289.2(CDKL5):c.2555C>T (p.Pro852Leu)	Benign	0	-4	Gene-specific
CDKL5	NM_001323289.2(CDKL5):c.1564T>G (p.Leu522Val)	Benign	0	-4	Gene-specific
CDKL5	NM_001323289.2(CDKL5):c.1064G>A (p.Arg355Gln)	Benign	0	-4	Gene-specific
CDKL5	NM_001323289.2(CDKL5):c.2243A>G (p.Asn748Ser)	Benign	0	-4	Gene-specific
CDKL5	NM_001323289.2(CDKL5):c.2200A>G (p.Thr734Ala)	Likely Benign	-1	-4	Gene-specific
CDKL5	NM_003159.2(CDKL5):c.215T>C (p.Ile72Thr)	Pathogenic	1	2	Gene-specific
CDKL5	NM_001323289.2(CDKL5):c.530A>G (p.Tyr177Cys)	Uncertain Significance	1	4	Gene-specific
CDKL5	NM_001323289.2(CDKL5):c.1768G>A (p.Glu590Lys)	Benign	0	-4	Gene-specific
CDKL5	NM_001323289.2(CDKL5):c.1930C>T (p.Leu644Phe)	Uncertain Significance	0	-4	Gene-specific
CDKL5	NM_001323289.2(CDKL5):c.872G>A (p.Cys291Tyr)	Uncertain Significance	0	3	Gene-specific
CDKL5	NM_001323289.2(CDKL5):c.89G>A (p.Cys30Tyr)	Uncertain Significance	0	4	Gene-specific
CDKL5	NM_003159.2(CDKL5):c.1196A>C (p.Asn399Thr)	Likely Benign	-1	-4	Gene-specific
CDKL5	NM_001323289.2(CDKL5):c.2684C>T (p.Pro895Leu)	Uncertain Significance	-1	-4	Gene-specific
CDKL5	NM_001323289.2(CDKL5):c.199C>T (p.Leu67Phe)	Uncertain Significance	1	2	Gene-specific
CDKL5	NM_001323289.2(CDKL5):c.514G>A (p.Val172Ile)	Uncertain Significance	0	0	Gene-specific
CDKL5	NM_001323289.2(CDKL5):c.2152G>A (p.Val718Met)	Pathogenic	0	-3	Gene-specific
CDKL5	NM_001323289.2(CDKL5):c.2194G>A (p.Val732Met)	Uncertain Significance	-1	-4	Gene-specific
CDKL5	NM_001323289.2(CDKL5):c.1612A>G (p.Thr538Ala)	Likely Benign	-1	-4	Gene-specific
DYSF	NM_001130987.2(DYSF):c.1906G>C (p.Gly636Arg)	Pathogenic	1	3	Gene-specific
DYSF	NM_001130987.2(DYSF):c.1906G>A (p.Gly636Arg)	Pathogenic	1	3	Gene-specific
DYSF	NM_001130987.2(DYSF):c.1216G>C (p.Val406Leu)	Benign	0	-4	Gene-specific
DYSF	NM_001130987.2(DYSF):c.1465G>A (p.Glu489Lys)	Benign	0	0	Gene-specific
DYSF	NM_001130987.2(DYSF):c.2554A>G (p.Ile852Val)	Benign	-1	-4	Gene-specific
DYSF	NM_001130987.2(DYSF):c.3946A>G (p.Ile1316Val)	Benign	0	-4	Gene-specific
DYSF	NM_001130987.2(DYSF):c.953T>A (p.Val318Glu)	Pathogenic	1	3	Gene-specific
DYSF	NM_001130987.2(DYSF):c.4076T>C (p.Leu1359Pro)	Pathogenic	1	3	Gene-specific
DYSF	NM_001130987.2(DYSF):c.4046G>T (p.Arg1349Leu)	Benign	0	2	Gene-specific
DYSF	NM_001130987.2(DYSF):c.4937T>C (p.Ile1646Thr)	Benign	0	-4	Gene-specific
DYSF	NM_001130987.2(DYSF):c.1931T>C (p.Met644Thr)	Likely Benign	0	-4	Gene-specific
DYSF	NM_001130987.2(DYSF):c.605C>A (p.Ala202Glu)	Benign	0	-4	Gene-specific
DYSF	NM_001130987.2(DYSF):c.1717C>T (p.Arg573Trp)	Pathogenic	1	3	Gene-specific
DYSF	NM_001130987.2(DYSF):c.3119G>A (p.Arg1040Gln)	Benign	0	-4	Gene-specific
DYSF	NM_001130987.2(DYSF):c.5176T>C (p.Ser1726Pro)	Likely Pathogenic	1	2	Gene-specific
DYSF	NM_001130987.2(DYSF):c.3167G>C (p.Arg1056Pro)	Pathogenic	1	3	Gene-specific
DYSF	NM_001130987.2(DYSF):c.386G>A (p.Gly129Glu)	Benign	0	0	Gene-specific
DYSF	NM_001130987.2(DYSF):c.4057G>A (p.Glu1353Lys)	Pathogenic	1	2	Gene-specific
DYSF	NM_001130987.2(DYSF):c.4078C>T (p.Arg1360Trp)	Likely Pathogenic	1	3	Gene-specific
DYSF	NM_001130987.2(DYSF):c.3167G>A (p.Arg1056Gln)	Pathogenic	1	1	Gene-specific
DYSF	NM_001130987.2(DYSF):c.2844G>C (p.Trp948Cys)	Pathogenic	1	3	Gene-specific
DYSF	NM_001130987.2(DYSF):c.1915G>A (p.Gly639Arg)	Pathogenic	1	2	Gene-specific
DYSF	NM_001130987.2(DYSF):c.853C>T (p.Arg285Trp)	Pathogenic	0	0	Gene-specific
DYSF	NM_001130987.2(DYSF):c.209T>G (p.Val70Gly)	Pathogenic	1	1	Gene-specific
DYSF	NM_001130987.2(DYSF):c.991G>A (p.Gly331Arg)	Pathogenic	1	3	Gene-specific
DYSF	NM_003494.4(DYSF):c.17T>A (p.Ile6Asn)	Uncertain Significance	0	0	Gene-specific
DYSF	NM_001130987.2(DYSF):c.5620A>G (p.Met1874Val)	Pathogenic	0	0	Gene-specific
DYSF	NM_001130987.2(DYSF):c.6155C>G (p.Pro2052Arg)	Likely Pathogenic	1	3	Gene-specific
DYSF	NM_001130987.2(DYSF):c.961T>C (p.Ser321Pro)	Likely Pathogenic	1	1	Gene-specific
DYSF	NM_001130987.2(DYSF):c.991G>C (p.Gly331Arg)	Pathogenic	1	3	Gene-specific
DYSF	NM_001130987.2(DYSF):c.5546G>A (p.Arg1849Lys)	Pathogenic	0	-4	Gene-specific
DYSF	NM_001130987.2(DYSF):c.4643T>G (p.Leu1548Arg)	Uncertain Significance	1	3	Gene-specific
DYSF	NM_001130987.2(DYSF):c.4556A>C (p.Lys1519Thr)	Likely Pathogenic	1	0	Gene-specific
DYSF	NM_001130987.2(DYSF):c.851C>T (p.Thr284Met)	Pathogenic	1	0	Gene-specific
DYSF	NM_001130987.2(DYSF):c.1609G>A (p.Gly537Arg)	Pathogenic	0	3	Gene-specific
DYSF	NM_001130987.2(DYSF):c.5626G>A (p.Asp1876Asn)	Pathogenic	1	2	Gene-specific
DYSF	NM_001130987.2(DYSF):c.3191G>A (p.Arg1064His)	Pathogenic	1	0	Gene-specific
DYSF	NM_001130987.2(DYSF):c.1439T>C (p.Leu480Pro)	Pathogenic	1	3	Gene-specific
DYSF	NM_001130987.2(DYSF):c.5194C>T (p.Arg1732Trp)	Pathogenic	1	2	Gene-specific
DYSF	NM_001130987.2(DYSF):c.6241C>T (p.Arg2081Cys)	Pathogenic	1	0	Gene-specific
DYSF	NM_001130987.2(DYSF):c.5413G>A (p.Glu1805Lys)	Pathogenic	1	3	Gene-specific
DYSF	NM_001130987.2(DYSF):c.1256G>C (p.Arg419Pro)	Uncertain Significance	1	3	Gene-specific
DYSF	NM_001130987.2(DYSF):c.991G>T (p.Gly331Trp)	Pathogenic	1	3	Gene-specific
DYSF	NM_001130987.2(DYSF):c.5419C>T (p.Arg1807Trp)	Pathogenic	1	2	Gene-specific
ENG	NM_001114753.3(ENG):c.991G>A (p.Gly331Ser)	Pathogenic	0	-3	Gene-specific
ENG	NM_001114753.3(ENG):c.572G>A (p.Gly191Asp)	Benign	0	0	Gene-specific
ENG	NM_001114753.3(ENG):c.392C>T (p.Pro131Leu)	Benign	0	-3	Gene-specific
ENG	NM_001114753.3(ENG):c.1160T>C (p.Leu387Pro)	Uncertain Significance	1	3	Gene-specific
ENG	NM_001114753.3(ENG):c.662T>C (p.Leu221Pro)	Likely Pathogenic	0	3	Gene-specific
ENG	NM_001114753.3(ENG):c.447G>C (p.Trp149Cys)	Pathogenic	1	3	Gene-specific
ENG	NM_001114753.3(ENG):c.1268A>G (p.Asn423Ser)	Likely Pathogenic	0	0	Gene-specific
ENG	NM_001114753.3(ENG):c.1145G>A (p.Cys382Tyr)	Pathogenic	0	-1	Gene-specific
F8	NM_000132.3(F8):c.980T>C (p.Leu327Pro)	Likely Pathogenic	1	4	Gene-specific
F8	NM_000132.4(F8):c.5303G>A (p.Arg1768His)	Pathogenic	1	0	Gene-specific
F8	NM_000132.3(F8):c.2947G>A (p.Val983Ile)	Benign	-1	-4	Gene-specific
F8	NM_000132.3(F8):c.2215G>A (p.Glu739Lys)	Pathogenic	1	0	Gene-specific
F8	NM_000132.3(F8):c.1508G>A (p.Arg503His)	Benign	0	-1	Gene-specific
F8	NM_000132.4(F8):c.5186G>A (p.Gly1729Glu)	Likely Pathogenic	1	4	Gene-specific
F8	NM_000132.4(F8):c.2453C>T (p.Thr818Ile)	Benign	0	0	Gene-specific
F8	NM_000132.3(F8):c.923C>T (p.Ser308Leu)	Pathogenic	1	4	Gene-specific
F8	NM_000132.3(F8):c.6769A>G (p.Met2257Val)	Benign	-1	-1	Gene-specific
F8	NM_000132.4(F8):c.6724G>A (p.Val2242Met)	Benign	0	0	Gene-specific
F8	NM_000132.4(F8):c.5815G>C (p.Ala1939Pro)	Uncertain Significance	1	4	Gene-specific
F8	NM_000132.4(F8):c.1834C>T (p.Arg612Cys)	Pathogenic	1	2	Gene-specific
F8	NM_000132.3(F8):c.1214T>G (p.Ile405Ser)	Likely Pathogenic	1	4	Gene-specific
F8	NM_000132.3(F8):c.5822A>G (p.Asn1941Ser)	Pathogenic	1	4	Gene-specific
F8	NM_000132.3(F8):c.1660A>G (p.Ser554Gly)	Pathogenic	1	4	Gene-specific
F8	NM_000132.4(F8):c.2961G>C (p.Glu987Asp)	Likely Benign	-1	-3	Gene-specific
F8	NM_000132.4(F8):c.4828G>T (p.Ala1610Ser)	Likely Benign	0	-4	Gene-specific
F8	NM_000132.4(F8):c.3280G>A (p.Glu1094Lys)	Benign	0	-2	Gene-specific
F8	NM_000132.4(F8):c.2840C>G (p.Pro947Arg)	Likely Benign	0	-3	Gene-specific
F8	NM_000132.4(F8):c.3169G>A (p.Glu1057Lys)	Benign	1	0	Gene-specific
F8	NM_000132.4(F8):c.5063C>T (p.Ser1688Leu)	Likely Benign	1	-2	Gene-specific
F8	NM_000132.4(F8):c.7021G>A (p.Glu2341Lys)	Likely Pathogenic	1	4	Gene-specific
F8	NM_000132.4(F8):c.2212T>G (p.Tyr738Asp)	Benign	0	0	Gene-specific
F8	NM_000132.4(F8):c.1468A>G (p.Arg490Gly)	Likely Pathogenic	1	4	Gene-specific
F8	NM_000132.4(F8):c.1030A>C (p.Lys344Gln)	Uncertain Significance	1	0	Gene-specific
F8	NM_000132.4(F8):c.6623A>G (p.Gln2208Arg)	Likely Pathogenic	1	3	Gene-specific
F8	NM_000132.4(F8):c.6658G>C (p.Ala2220Pro)	Pathogenic	1	0	Gene-specific
FBN1	NM_000138.5(FBN1):c.1147G>A (p.Glu383Lys)	Likely Pathogenic	1	-1	Gene-specific
FBN1	NM_000138.5(FBN1):c.6491G>A (p.Cys2164Tyr)	Pathogenic	1	3	Gene-specific
FBN1	NM_000138.5(FBN1):c.6724C>T (p.Arg2242Cys)	Uncertain Significance	0	-3	Gene-specific
FBN1	NM_000138.5(FBN1):c.7726C>T (p.Arg2576Cys)	Pathogenic	0	-2	Gene-specific
FBN1	NM_000138.5(FBN1):c.7775G>T (p.Cys2592Phe)	Pathogenic	1	4	Gene-specific
FBN1	NM_000138.5(FBN1):c.7892G>A (p.Cys2631Tyr)	Pathogenic	1	4	Gene-specific
FBN1	NM_000138.5(FBN1):c.8002G>T (p.Gly2668Cys)	Likely Pathogenic	1	1	Gene-specific
FBN1	NM_000138.5(FBN1):c.8378A>G (p.Tyr2793Cys)	Likely Pathogenic	1	3	Gene-specific
FBN1	NM_000138.5(FBN1):c.5518C>T (p.Arg1840Cys)	Likely Pathogenic	1	-1	Gene-specific
FBN1	NM_000138.5(FBN1):c.5747G>A (p.Cys1916Tyr)	Likely Pathogenic	1	4	Gene-specific
FBN1	NM_000138.5(FBN1):c.4330T>A (p.Cys1444Ser)	Pathogenic	1	3	Gene-specific
FBN1	NM_000138.5(FBN1):c.338C>G (p.Ser113Cys)	Likely Pathogenic	0	-4	Gene-specific
FBN1	NM_000138.5(FBN1):c.3290G>A (p.Cys1097Tyr)	Pathogenic	1	4	Gene-specific
FBN1	NM_000138.5(FBN1):c.2660G>A (p.Cys887Tyr)	Likely Pathogenic	1	3	Gene-specific
FBN1	NM_000138.5(FBN1):c.1481G>C (p.Cys494Ser)	Likely Pathogenic	1	3	Gene-specific
FBN1	NM_000138.5(FBN1):c.1453C>T (p.Arg485Cys)	Pathogenic	0	-3	Gene-specific
FBN1	NM_000138.5(FBN1):c.79G>A (p.Ala27Thr)	Benign	-1	-4	Gene-specific
FBN1	NM_000138.5(FBN1):c.3677G>T (p.Gly1226Val)	Uncertain Significance	1	3	Gene-specific
FBN1	NM_000138.5(FBN1):c.3712G>A (p.Asp1238Asn)	Pathogenic	1	0	Gene-specific
FBN1	NM_000138.5(FBN1):c.7409G>T (p.Cys2470Phe)	Likely Pathogenic	1	4	Gene-specific
FBN1	NM_000138.5(FBN1):c.5743C>T (p.Arg1915Cys)	Pathogenic	0	0	Gene-specific
FBN1	NM_000138.5(FBN1):c.3707G>A (p.Cys1236Tyr)	Pathogenic	1	3	Gene-specific
FBN1	NM_000138.5(FBN1):c.3409C>T (p.Arg1137Cys)	Uncertain Significance	0	0	Gene-specific
FBN1	NM_000138.5(FBN1):c.2287T>G (p.Cys763Gly)	Pathogenic	1	4	Gene-specific
FBN1	NM_000138.5(FBN1):c.2287T>C (p.Cys763Arg)	Likely Pathogenic	1	4	Gene-specific
FBN1	NM_000138.5(FBN1):c.188A>G (p.Tyr63Cys)	Uncertain Significance	0	3	Gene-specific
FBN1	NM_000138.5(FBN1):c.4414T>C (p.Cys1472Arg)	Pathogenic	1	4	Gene-specific
FBN1	NM_000138.5(FBN1):c.1630G>A (p.Gly544Arg)	Pathogenic	1	3	Gene-specific
FBN1	NM_000138.5(FBN1):c.6446A>G (p.Tyr2149Cys)	Pathogenic	1	3	Gene-specific
FBN1	NM_000138.5(FBN1):c.6032G>A (p.Cys2011Tyr)	Likely Pathogenic	1	3	Gene-specific
FBN1	NM_000138.5(FBN1):c.4526A>G (p.Tyr1509Cys)	Likely Pathogenic	1	2	Gene-specific
FBN1	NM_000138.5(FBN1):c.4405C>T (p.Arg1469Cys)	Uncertain Significance	1	0	Gene-specific
FBN1	NM_000138.5(FBN1):c.4081T>C (p.Cys1361Arg)	Likely Pathogenic	1	3	Gene-specific
FBN1	NM_000138.5(FBN1):c.1390C>T (p.Arg464Cys)	Likely Pathogenic	0	0	Gene-specific
FBN1	NM_000138.5(FBN1):c.7540G>A (p.Gly2514Arg)	Pathogenic	0	3	Gene-specific
FBN1	NM_000138.5(FBN1):c.3428G>A (p.Gly1143Asp)	Uncertain Significance	1	3	Gene-specific
FBN1	NM_000138.5(FBN1):c.1634G>A (p.Arg545His)	Uncertain Significance	1	0	Gene-specific
FBN1	NM_000138.5(FBN1):c.6448C>T (p.Arg2150Cys)	Pathogenic	1	0	Gene-specific
FBN1	NM_000138.5(FBN1):c.6662G>A (p.Cys2221Tyr)	Pathogenic	1	4	Gene-specific
FBN1	NM_000138.5(FBN1):c.6820T>C (p.Cys2274Arg)	Likely Pathogenic	1	4	Gene-specific
FBN1	NM_000138.5(FBN1):c.7763A>G (p.Tyr2588Cys)	Uncertain Significance	1	3	Gene-specific
FBN1	NM_000138.5(FBN1):c.3476G>A (p.Cys1159Tyr)	Pathogenic	1	4	Gene-specific
FBN1	NM_000138.5(FBN1):c.6185A>G (p.Tyr2062Cys)	Uncertain Significance	0	-3	Gene-specific
FBN1	NM_000138.5(FBN1):c.911G>A (p.Cys304Tyr)	Likely Pathogenic	1	4	Gene-specific
FBN1	NM_000138.5(FBN1):c.5885A>G (p.Tyr1962Cys)	Likely Pathogenic	1	1	Gene-specific
FBN1	NM_000138.5(FBN1):c.4280A>G (p.Tyr1427Cys)	Likely Pathogenic	1	3	Gene-specific
FBN1	NM_000138.5(FBN1):c.3557A>G (p.Tyr1186Cys)	Pathogenic	1	2	Gene-specific
FBN1	NM_000138.5(FBN1):c.3457T>C (p.Cys1153Arg)	Likely Pathogenic	1	3	Gene-specific
FBN1	NM_000138.5(FBN1):c.1708T>C (p.Cys570Arg)	Pathogenic	1	4	Gene-specific
FBN1	NM_000138.5(FBN1):c.1556A>G (p.Tyr519Cys)	Pathogenic	1	1	Gene-specific
FBN1	NM_000138.5(FBN1):c.1030C>T (p.Arg344Cys)	Likely Pathogenic	1	0	Gene-specific
FBN1	NM_000138.5(FBN1):c.3554G>A (p.Gly1185Asp)	Likely Pathogenic	1	3	Gene-specific
FBN1	NM_000138.5(FBN1):c.3650G>A (p.Gly1217Asp)	Likely Pathogenic	1	1	Gene-specific
FBN1	NM_000138.5(FBN1):c.6410G>A (p.Cys2137Tyr)	Pathogenic	1	3	Gene-specific
FBN1	NM_000138.5(FBN1):c.6541T>C (p.Cys2181Arg)	Likely Pathogenic	1	4	Gene-specific
FBN1	NM_000138.5(FBN1):c.6866G>C (p.Cys2289Ser)	Likely Pathogenic	1	3	Gene-specific
FBN1	NM_000138.5(FBN1):c.7016G>A (p.Cys2339Tyr)	Likely Pathogenic	1	1	Gene-specific
FBN1	NM_000138.5(FBN1):c.5558G>A (p.Cys1853Tyr)	Pathogenic	1	4	Gene-specific
FBN1	NM_000138.5(FBN1):c.5966G>T (p.Cys1989Phe)	Pathogenic	1	4	Gene-specific
FBN1	NM_000138.5(FBN1):c.4409G>A (p.Cys1470Tyr)	Pathogenic	1	4	Gene-specific
FBN1	NM_000138.5(FBN1):c.3508C>T (p.Arg1170Cys)	Uncertain Significance	0	0	Gene-specific
FBN1	NM_000138.5(FBN1):c.2624G>A (p.Cys875Tyr)	Likely Pathogenic	1	3	Gene-specific
FBN1	NM_000138.5(FBN1):c.199T>C (p.Cys67Arg)	Likely Pathogenic	1	4	Gene-specific
FBN1	NM_000138.5(FBN1):c.1825C>T (p.Arg609Cys)	Uncertain Significance	1	-2	Gene-specific
FBN1	NM_000138.5(FBN1):c.1850G>A (p.Cys617Tyr)	Pathogenic	1	4	Gene-specific
FBN1	NM_000138.5(FBN1):c.1379G>A (p.Cys460Tyr)	Likely Pathogenic	1	4	Gene-specific
FBN1	NM_000138.5(FBN1):c.1538G>T (p.Cys513Phe)	Likely Pathogenic	1	4	Gene-specific
FBN1	NM_000138.5(FBN1):c.7577A>G (p.Asn2526Ser)	Likely Pathogenic	1	-2	Gene-specific
FBN1	NM_000138.5(FBN1):c.3509G>A (p.Arg1170His)	Benign	0	-4	Gene-specific
FBN1	NM_000138.5(FBN1):c.5443G>A (p.Gly1815Ser)	Uncertain Significance	0	-4	Gene-specific
FBN1	NM_000138.4(FBN1):c.985A>G (p.Ile329Val)	Likely Benign	-1	-4	Gene-specific
FBN1	NM_000138.5(FBN1):c.3689T>C (p.Met1230Thr)	Likely Benign	0	-4	Gene-specific
FBN1	NM_000138.4(FBN1):c.629G>A (p.Cys210Tyr)	Likely Pathogenic	1	4	Gene-specific
FBN1	NM_000138.5(FBN1):c.4640C>T (p.Thr1547Ile)	Benign	0	-3	Gene-specific
FBN1	NM_000138.5(FBN1):c.4466A>G (p.Asn1489Ser)	Uncertain Significance	0	0	Gene-specific
FBN1	NM_000138.4(FBN1):c.8363C>T (p.Thr2788Met)	Benign	0	-3	Gene-specific
FBN1	NM_000138.5(FBN1):c.7003C>T (p.Arg2335Trp)	Likely Pathogenic	1	-2	Gene-specific
FBN1	NM_000138.4(FBN1):c.4459G>A (p.Asp1487Asn)	Pathogenic	1	2	Gene-specific
FBN1	NM_000138.5(FBN1):c.3058A>G (p.Thr1020Ala)	Likely Benign	0	-4	Gene-specific
FBN1	NM_000138.5(FBN1):c.3422C>T (p.Pro1141Leu)	Benign	0	-3	Gene-specific
FOXG1	NM_005249.5(FOXG1):c.344C>T (p.Ala115Val)	Benign	-1	-3	Gene-specific
FOXG1	NM_005249.5(FOXG1):c.218A>C (p.Gln73Pro)	Benign	-1	0	Gene-specific
FOXG1	NM_005249.5(FOXG1):c.251C>A (p.Pro84His)	Benign	-1	-2	Gene-specific
FOXG1	NM_005249.5(FOXG1):c.209A>C (p.Gln70Pro)	Benign	-1	0	Gene-specific
FOXG1	NM_005249.5(FOXG1):c.1045T>G (p.Ser349Ala)	Likely Benign	0	-3	Gene-specific
FOXG1	NM_005249.5(FOXG1):c.227C>T (p.Pro76Leu)	Likely Benign	-1	-2	Gene-specific
FOXG1	NM_005249.5(FOXG1):c.565C>G (p.Leu189Val)	Likely Pathogenic	1	0	Gene-specific
FOXG1	NM_005249.5(FOXG1):c.620T>C (p.Ile207Thr)	Likely Pathogenic	1	1	Gene-specific
FOXG1	NM_005249.5(FOXG1):c.1273T>C (p.Ser425Pro)	Benign	0	0	Gene-specific
FOXG1	NM_005249.5(FOXG1):c.221C>A (p.Pro74Gln)	Benign	-1	-2	Gene-specific
FOXG1	NM_005249.5(FOXG1):c.1384A>G (p.Ser462Gly)	Benign	0	-2	Gene-specific
FOXG1	NM_005249.5(FOXG1):c.455G>C (p.Gly152Ala)	Benign	-1	-3	Gene-specific
FOXG1	NM_005249.5(FOXG1):c.977G>A (p.Ser326Asn)	Likely Benign	0	-1	Gene-specific
FOXG1	NM_005249.5(FOXG1):c.382G>T (p.Gly128Cys)	Likely Benign	0	0	Gene-specific
FOXG1	NM_005249.5(FOXG1):c.376G>A (p.Gly126Ser)	Benign	0	-3	Gene-specific
FOXG1	NM_005249.5(FOXG1):c.503G>T (p.Gly168Val)	Uncertain Significance	0	-2	Gene-specific
FOXG1	NM_005249.5(FOXG1):c.275C>T (p.Ala92Val)	Likely Benign	-1	-3	Gene-specific
FOXG1	NM_005249.5(FOXG1):c.245C>A (p.Pro82Gln)	Benign	-1	-1	Gene-specific
FOXG1	NM_005249.5(FOXG1):c.268G>T (p.Ala90Ser)	Benign	-1	-4	Gene-specific
FOXG1	NM_005249.5(FOXG1):c.953A>T (p.His318Leu)	Uncertain Significance	0	0	Gene-specific
FOXG1	NM_005249.5(FOXG1):c.263G>A (p.Arg88Gln)	Likely Benign	-1	-2	Gene-specific
FOXG1	NM_005249.5(FOXG1):c.681C>G (p.Asn227Lys)	Uncertain Significance	1	2	Gene-specific
FOXG1	NM_005249.5(FOXG1):c.256C>A (p.Gln86Lys)	Likely Benign	-1	-2	Gene-specific
FOXG1	NM_005249.5(FOXG1):c.685A>C (p.Ile229Leu)	Likely Pathogenic	1	1	Gene-specific
FOXG1	NM_005249.5(FOXG1):c.503G>C (p.Gly168Ala)	Benign	-1	-4	Gene-specific
FOXG1	NM_005249.5(FOXG1):c.573G>A (p.Met191Ile)	Likely Pathogenic	1	0	Gene-specific
FOXG1	NM_005249.5(FOXG1):c.706A>G (p.Asn236Asp)	Likely Pathogenic	1	1	Gene-specific
FOXG1	NM_005249.5(FOXG1):c.748G>A (p.Gly250Ser)	Likely Pathogenic	1	1	Gene-specific
FOXG1	NM_005249.5(FOXG1):c.670G>A (p.Gly224Ser)	Likely Pathogenic	1	1	Gene-specific
FOXG1	NM_005249.5(FOXG1):c.471G>T (p.Lys157Asn)	Likely Benign	-1	-2	Gene-specific
FOXG1	NM_005249.5(FOXG1):c.326C>T (p.Pro109Leu)	Likely Benign	-1	-1	Gene-specific
FOXG1	NM_005249.4(FOXG1):c.561C>A (p.Asn187Lys)	Pathogenic	0	0	Gene-specific
FOXG1	NM_005249.5(FOXG1):c.131A>C (p.His44Pro)	Likely Benign	-1	0	Gene-specific
FOXG1	NM_005249.5(FOXG1):c.310C>T (p.Leu104Phe)	Uncertain Significance	-1	-3	Gene-specific
LDLR	NM_000527.5(LDLR):c.2089G>A (p.Ala697Thr)	Uncertain Significance	1	-2	Gene-specific
LDLR	NM_000527.5(LDLR):c.1080T>G (p.Asp360Glu)	Uncertain Significance	-1	-4	Gene-specific
LDLR	NM_000527.5(LDLR):c.1946C>T (p.Pro649Leu)	Uncertain Significance	1	0	Gene-specific
LDLR	NM_000527.5(LDLR):c.1748A>G (p.His583Arg)	Likely Pathogenic	1	3	Gene-specific
LDLR	NM_000527.5(LDLR):c.2120A>T (p.Asp707Val)	Uncertain Significance	1	4	Gene-specific
LDLR	NM_000527.5(LDLR):c.292G>T (p.Gly98Cys)	Uncertain Significance	0	0	Gene-specific
LDLR	NM_000527.5(LDLR):c.2441G>A (p.Arg814Gln)	Uncertain Significance	1	0	Gene-specific
LDLR	NM_000527.5(LDLR):c.1495T>C (p.Ser499Pro)	Likely Pathogenic	1	3	Gene-specific
LDLR	NM_000527.5(LDLR):c.311G>T (p.Cys104Phe)	Likely Pathogenic	1	4	Gene-specific
LDLR	NM_000527.5(LDLR):c.188G>T (p.Cys63Phe)	Uncertain Significance	1	4	Gene-specific
LDLR	NM_000527.5(LDLR):c.2106G>C (p.Met702Ile)	Uncertain Significance	0	-1	Gene-specific
LDLR	NM_000527.5(LDLR):c.1529C>T (p.Thr510Met)	Uncertain Significance	1	0	Gene-specific
LDLR	NM_000527.5(LDLR):c.1284C>G (p.Asn428Lys)	Uncertain Significance	0	3	Gene-specific
LDLR	NM_000527.5(LDLR):c.1283A>G (p.Asn428Ser)	Uncertain Significance	0	0	Gene-specific
LDLR	NM_000527.5(LDLR):c.1739C>T (p.Ser580Phe)	Likely Pathogenic	1	3	Gene-specific
LDLR	NM_000527.5(LDLR):c.919G>T (p.Asp307Tyr)	Uncertain Significance	1	4	Gene-specific
LDLR	NM_000527.5(LDLR):c.920A>G (p.Asp307Gly)	Likely Pathogenic	1	4	Gene-specific
LDLR	NM_000527.5(LDLR):c.211G>A (p.Gly71Arg)	Uncertain Significance	-1	-3	Gene-specific
LDLR	NM_000527.5(LDLR):c.853C>T (p.His285Tyr)	Uncertain Significance	-1	-2	Gene-specific
LDLR	NM_000527.5(LDLR):c.1211C>T (p.Thr404Ile)	Likely Pathogenic	1	4	Gene-specific
LDLR	NM_000527.5(LDLR):c.2119G>T (p.Asp707Tyr)	Likely Pathogenic	1	4	Gene-specific
LDLR	NM_000527.5(LDLR):c.2440C>T (p.Arg814Trp)	Uncertain Significance	0	1	Gene-specific
LDLR	NM_000527.5(LDLR):c.1567G>C (p.Val523Leu)	Likely Pathogenic	1	0	Gene-specific
LDLR	NM_000527.5(LDLR):c.1496C>G (p.Ser499Cys)	Uncertain Significance	1	0	Gene-specific
LDLR	NM_000527.5(LDLR):c.1285G>C (p.Val429Leu)	Pathogenic	1	0	Gene-specific
LDLR	NM_000527.5(LDLR):c.1285G>T (p.Val429Leu)	Pathogenic	1	0	Gene-specific
LDLR	NM_000527.5(LDLR):c.1475A>G (p.Asp492Gly)	Likely Pathogenic	1	4	Gene-specific
LDLR	NM_000527.5(LDLR):c.1367T>A (p.Leu456His)	Uncertain Significance	1	0	Gene-specific
LDLR	NM_000527.5(LDLR):c.1444G>C (p.Asp482His)	Likely Pathogenic	1	4	Gene-specific
LDLR	NM_000527.5(LDLR):c.491T>C (p.Leu164Pro)	Uncertain Significance	1	4	Gene-specific
LDLR	NM_000527.5(LDLR):c.542C>G (p.Pro181Arg)	Likely Pathogenic	0	0	Gene-specific
LDLR	NM_000527.5(LDLR):c.1394A>G (p.Tyr465Cys)	Uncertain Significance	1	0	Gene-specific
LDLR	NM_000527.5(LDLR):c.274C>G (p.Gln92Glu)	Uncertain Significance	-1	-4	Gene-specific
LDLR	NM_000527.5(LDLR):c.2126G>A (p.Arg709Lys)	Uncertain Significance	1	-3	Gene-specific
LDLR	NM_000527.5(LDLR):c.1945C>T (p.Pro649Ser)	Uncertain Significance	1	0	Gene-specific
LDLR	NM_000527.5(LDLR):c.1961T>C (p.Leu654Pro)	Uncertain Significance	1	4	Gene-specific
LDLR	NM_000527.5(LDLR):c.1747C>G (p.His583Asp)	Likely Pathogenic	1	4	Gene-specific
LDLR	NM_000527.5(LDLR):c.1567G>T (p.Val523Leu)	Likely Pathogenic	1	0	Gene-specific
LDLR	NM_000527.5(LDLR):c.1474G>C (p.Asp492His)	Likely Pathogenic	1	4	Gene-specific
LDLR	NM_000527.5(LDLR):c.1366C>T (p.Leu456Phe)	Uncertain Significance	-1	-4	Gene-specific
LDLR	NM_000527.5(LDLR):c.1444G>T (p.Asp482Tyr)	Uncertain Significance	1	4	Gene-specific
LDLR	NM_000527.5(LDLR):c.1739C>G (p.Ser580Cys)	Uncertain Significance	1	3	Gene-specific
LDLR	NM_000527.5(LDLR):c.1927G>C (p.Ala643Pro)	Uncertain Significance	0	1	Gene-specific
LDLR	NM_000527.5(LDLR):c.2023G>A (p.Gly675Ser)	Likely Pathogenic	1	0	Gene-specific
LDLR	NM_000527.5(LDLR):c.1329G>C (p.Trp443Cys)	Pathogenic	1	4	Gene-specific
LDLR	NM_000527.5(LDLR):c.1327T>C (p.Trp443Arg)	Likely Pathogenic	1	4	Gene-specific
LDLR	NM_000527.5(LDLR):c.2297C>T (p.Thr766Ile)	Uncertain Significance	0	0	Gene-specific
LDLR	NM_000527.5(LDLR):c.2296A>G (p.Thr766Ala)	Uncertain Significance	-1	0	Gene-specific
LDLR	NM_000527.5(LDLR):c.2089G>C (p.Ala697Pro)	Likely Pathogenic	1	2	Gene-specific
LDLR	NM_000527.5(LDLR):c.1457G>A (p.Ser486Asn)	Uncertain Significance	-1	0	Gene-specific
LDLR	NM_000527.5(LDLR):c.1960C>T (p.Leu654Phe)	Uncertain Significance	0	0	Gene-specific
LDLR	NM_000527.5(LDLR):c.1747C>T (p.His583Tyr)	Pathogenic	1	2	Gene-specific
LDLR	NM_000527.5(LDLR):c.1749C>G (p.His583Gln)	Uncertain Significance	1	1	Gene-specific
LDLR	NM_000527.5(LDLR):c.292G>C (p.Gly98Arg)	Uncertain Significance	0	0	Gene-specific
LDLR	NM_000527.5(LDLR):c.1640T>C (p.Leu547Pro)	Uncertain Significance	1	4	Gene-specific
LDLR	NM_000527.5(LDLR):c.1367T>C (p.Leu456Pro)	Uncertain Significance	1	2	Gene-specific
LDLR	NM_000527.5(LDLR):c.1444G>A (p.Asp482Asn)	Pathogenic	1	4	Gene-specific
LDLR	NM_000527.5(LDLR):c.1445A>G (p.Asp482Gly)	Likely Pathogenic	1	4	Gene-specific
LDLR	NM_000527.5(LDLR):c.1516G>A (p.Val506Met)	Uncertain Significance	1	-4	Gene-specific
LDLR	NM_000527.5(LDLR):c.479G>A (p.Cys160Tyr)	Uncertain Significance	1	4	Gene-specific
LDLR	NM_000527.5(LDLR):c.1329G>T (p.Trp443Cys)	Likely Pathogenic	1	4	Gene-specific
LDLR	NM_000527.5(LDLR):c.1328G>C (p.Trp443Ser)	Likely Pathogenic	1	4	Gene-specific
LDLR	NM_000527.5(LDLR):c.2125A>G (p.Arg709Gly)	Uncertain Significance	0	0	Gene-specific
LDLR	NM_000527.5(LDLR):c.1456A>G (p.Ser486Gly)	Uncertain Significance	0	-4	Gene-specific
LDLR	NM_000527.5(LDLR):c.1749C>A (p.His583Gln)	Likely Pathogenic	1	1	Gene-specific
LDLR	NM_000527.5(LDLR):c.854A>G (p.His285Arg)	Uncertain Significance	-1	-2	Gene-specific
LDLR	NM_000527.5(LDLR):c.855C>A (p.His285Gln)	Uncertain Significance	0	-3	Gene-specific
LDLR	NM_000527.5(LDLR):c.826T>C (p.Cys276Arg)	Likely Pathogenic	1	4	Gene-specific
LDLR	NM_000527.5(LDLR):c.551G>A (p.Cys184Tyr)	Pathogenic	1	4	Gene-specific
LDLR	NM_000527.5(LDLR):c.293G>C (p.Gly98Ala)	Uncertain Significance	0	-2	Gene-specific
LDLR	NM_000527.5(LDLR):c.1567G>A (p.Val523Met)	Pathogenic	1	0	Gene-specific
LDLR	NM_000527.5(LDLR):c.1285G>A (p.Val429Met)	Pathogenic	1	0	Gene-specific
LDLR	NM_000527.5(LDLR):c.1474G>A (p.Asp492Asn)	Pathogenic	1	3	Gene-specific
LDLR	NM_000527.5(LDLR):c.811G>A (p.Val271Ile)	Uncertain Significance	-1	-4	Gene-specific
LDLR	NM_000527.5(LDLR):c.1738T>C (p.Ser580Pro)	Uncertain Significance	1	4	Gene-specific
LDLR	NM_000527.5(LDLR):c.1516G>C (p.Val506Leu)	Uncertain Significance	-1	-4	Gene-specific
LDLR	NM_000527.5(LDLR):c.1928C>T (p.Ala643Val)	Uncertain Significance	-1	-3	Gene-specific
LDLR	NM_000527.5(LDLR):c.1955T>C (p.Met652Thr)	Likely Pathogenic	0	0	Gene-specific
LDLR	NM_000527.5(LDLR):c.1027G>T (p.Gly343Cys)	Pathogenic	1	4	Gene-specific
LDLR	NM_000527.5(LDLR):c.1067A>C (p.Asp356Ala)	Likely Pathogenic	1	0	Gene-specific
LDLR	NM_000527.5(LDLR):c.298G>A (p.Asp100Asn)	Likely Pathogenic	1	2	Gene-specific
LDLR	NM_000527.5(LDLR):c.980A>C (p.His327Pro)	Uncertain Significance	1	4	Gene-specific
LDLR	NM_000527.5(LDLR):c.981C>A (p.His327Gln)	Uncertain Significance	0	2	Gene-specific
LDLR	NM_000527.5(LDLR):c.241C>A (p.Arg81Ser)	Uncertain Significance	0	0	Gene-specific
LDLR	NM_000527.5(LDLR):c.1003G>A (p.Gly335Ser)	Likely Pathogenic	1	1	Gene-specific
LDLR	NM_000527.5(LDLR):c.1004G>T (p.Gly335Val)	Uncertain Significance	1	4	Gene-specific
LDLR	NM_000527.5(LDLR):c.305A>C (p.Gln102Pro)	Uncertain Significance	0	-2	Gene-specific
LDLR	NM_000527.5(LDLR):c.937T>C (p.Cys313Arg)	Likely Pathogenic	1	4	Gene-specific
LDLR	NM_000527.5(LDLR):c.859G>A (p.Gly287Ser)	Uncertain Significance	1	3	Gene-specific
LDLR	NM_000527.5(LDLR):c.914G>C (p.Trp305Ser)	Uncertain Significance	0	2	Gene-specific
LDLR	NM_000527.5(LDLR):c.1049G>C (p.Arg350Pro)	Likely Pathogenic	0	2	Gene-specific
LDLR	NM_000527.5(LDLR):c.737G>T (p.Gly246Val)	Uncertain Significance	1	3	Gene-specific
LDLR	NM_000527.5(LDLR):c.1942T>G (p.Ser648Ala)	Uncertain Significance	-1	-4	Gene-specific
LDLR	NM_000527.5(LDLR):c.1943C>T (p.Ser648Phe)	Uncertain Significance	-1	0	Gene-specific
LDLR	NM_000527.5(LDLR):c.1951G>T (p.Asp651Tyr)	Likely Pathogenic	1	3	Gene-specific
LDLR	NM_000527.5(LDLR):c.2475C>G (p.Asn825Lys)	Likely Pathogenic	1	4	Gene-specific
LDLR	NM_000527.5(LDLR):c.1186G>A (p.Gly396Ser)	Likely Pathogenic	1	0	Gene-specific
LDLR	NM_000527.5(LDLR):c.82G>A (p.Glu28Lys)	Uncertain Significance	-1	-4	Gene-specific
LDLR	NM_000527.5(LDLR):c.4G>C (p.Gly2Arg)	Uncertain Significance	0	-4	Gene-specific
LDLR	NM_000527.5(LDLR):c.240C>A (p.Asn80Lys)	Uncertain Significance	-1	0	Gene-specific
LDLR	NM_000527.5(LDLR):c.239A>G (p.Asn80Ser)	Uncertain Significance	-1	-4	Gene-specific
LDLR	NM_000527.5(LDLR):c.1765G>T (p.Asp589Tyr)	Uncertain Significance	-1	0	Gene-specific
LDLR	NM_000527.5(LDLR):c.1765G>C (p.Asp589His)	Uncertain Significance	-1	0	Gene-specific
LDLR	NM_000527.5(LDLR):c.1720C>T (p.Arg574Cys)	Uncertain Significance	1	3	Gene-specific
LDLR	NM_000527.5(LDLR):c.932A>C (p.Lys311Thr)	Uncertain Significance	1	0	Gene-specific
LDLR	NM_000527.5(LDLR):c.890A>C (p.Asn297Thr)	Uncertain Significance	1	3	Gene-specific
LDLR	NM_000527.5(LDLR):c.139G>C (p.Asp47His)	Uncertain Significance	1	4	Gene-specific
LDLR	NM_000527.5(LDLR):c.1968C>G (p.His656Gln)	Uncertain Significance	1	3	Gene-specific
LDLR	NM_000527.5(LDLR):c.270T>A (p.Asp90Glu)	Pathogenic	1	2	Gene-specific
LDLR	NM_000527.5(LDLR):c.1432G>T (p.Gly478Trp)	Uncertain Significance	1	4	Gene-specific
LDLR	NM_000527.5(LDLR):c.1433G>A (p.Gly478Glu)	Likely Pathogenic	1	4	Gene-specific
LDLR	NM_000527.5(LDLR):c.796G>T (p.Asp266Tyr)	Pathogenic	1	4	Gene-specific
LDLR	NM_000527.5(LDLR):c.908G>A (p.Arg303Gln)	Uncertain Significance	-1	-4	Gene-specific
LDLR	NM_000527.5(LDLR):c.2251C>T (p.Arg751Trp)	Likely Benign	-1	-4	Gene-specific
LDLR	NM_000527.5(LDLR):c.1856T>C (p.Phe619Ser)	Likely Pathogenic	1	4	Gene-specific
LDLR	NM_000527.5(LDLR):c.2113G>T (p.Ala705Ser)	Uncertain Significance	0	-4	Gene-specific
LDLR	NM_000527.5(LDLR):c.1217G>C (p.Arg406Pro)	Likely Pathogenic	1	4	Gene-specific
LDLR	NM_000527.5(LDLR):c.2043C>G (p.Cys681Trp)	Pathogenic	1	4	Gene-specific
LDLR	NM_000527.5(LDLR):c.1966C>A (p.His656Asn)	Uncertain Significance	1	4	Gene-specific
LDLR	NM_000527.5(LDLR):c.1816G>T (p.Ala606Ser)	Uncertain Significance	0	-4	Gene-specific
LDLR	NM_000527.5(LDLR):c.343C>T (p.Arg115Cys)	Likely Pathogenic	1	0	Gene-specific
LDLR	NM_000527.5(LDLR):c.58G>A (p.Gly20Arg)	Benign	0	-2	Gene-specific
LDLR	NM_000527.5(LDLR):c.1975A>C (p.Thr659Pro)	Likely Pathogenic	0	0	Gene-specific
LDLR	NM_000527.5(LDLR):c.1435C>G (p.Leu479Val)	Uncertain Significance	0	0	Gene-specific
LDLR	NM_000527.5(LDLR):c.1436T>C (p.Leu479Pro)	Uncertain Significance	1	4	Gene-specific
LDLR	NM_000527.5(LDLR):c.979C>T (p.His327Tyr)	Uncertain Significance	1	2	Gene-specific
LDLR	NM_000527.5(LDLR):c.1916T>G (p.Val639Gly)	Likely Pathogenic	0	0	Gene-specific
LDLR	NM_000527.5(LDLR):c.737G>A (p.Gly246Glu)	Uncertain Significance	1	3	Gene-specific
LDLR	NM_000527.5(LDLR):c.1571T>G (p.Val524Gly)	Uncertain Significance	1	4	Gene-specific
LDLR	NM_000527.5(LDLR):c.1088C>A (p.Thr363Asn)	Uncertain Significance	-1	0	Gene-specific
LDLR	NM_000527.5(LDLR):c.2041T>G (p.Cys681Gly)	Likely Pathogenic	1	4	Gene-specific
LDLR	NM_000527.5(LDLR):c.2225C>T (p.Thr742Ile)	Uncertain Significance	0	-4	Gene-specific
LDLR	NM_000527.5(LDLR):c.2291T>C (p.Ile764Thr)	Likely Benign	-1	-4	Gene-specific
LDLR	NM_000527.5(LDLR):c.91G>A (p.Glu31Lys)	Uncertain Significance	1	1	Gene-specific
LDLR	NM_000527.5(LDLR):c.1028G>T (p.Gly343Val)	Likely Pathogenic	1	4	Gene-specific
LDLR	NM_000527.5(LDLR):c.1067A>T (p.Asp356Val)	Likely Pathogenic	1	1	Gene-specific
LDLR	NM_000527.5(LDLR):c.1792A>C (p.Ile598Leu)	Uncertain Significance	-1	0	Gene-specific
LDLR	NM_000527.5(LDLR):c.241C>T (p.Arg81Cys)	Likely Pathogenic	1	0	Gene-specific
LDLR	NM_000527.5(LDLR):c.242G>A (p.Arg81His)	Uncertain Significance	0	-4	Gene-specific
LDLR	NM_000527.5(LDLR):c.1552A>G (p.Lys518Glu)	Uncertain Significance	0	0	Gene-specific
LDLR	NM_000527.5(LDLR):c.1003G>C (p.Gly335Arg)	Uncertain Significance	1	4	Gene-specific
LDLR	NM_000527.5(LDLR):c.1004G>A (p.Gly335Asp)	Uncertain Significance	1	4	Gene-specific
LDLR	NM_000527.5(LDLR):c.1070A>G (p.Glu357Gly)	Uncertain Significance	1	4	Gene-specific
LDLR	NM_000527.5(LDLR):c.915G>T (p.Trp305Cys)	Uncertain Significance	1	3	Gene-specific
LDLR	NM_000527.5(LDLR):c.226G>T (p.Gly76Trp)	Uncertain Significance	1	0	Gene-specific
LDLR	NM_000527.5(LDLR):c.665G>T (p.Cys222Phe)	Likely Pathogenic	1	4	Gene-specific
LDLR	NM_000527.5(LDLR):c.731C>G (p.Ser244Cys)	Uncertain Significance	0	-3	Gene-specific
LDLR	NM_000527.5(LDLR):c.1868T>C (p.Ile623Thr)	Uncertain Significance	0	0	Gene-specific
LDLR	NM_000527.5(LDLR):c.440C>T (p.Thr147Ile)	Likely Pathogenic	1	0	Gene-specific
LDLR	NM_000527.5(LDLR):c.1449G>C (p.Trp483Cys)	Uncertain Significance	1	4	Gene-specific
LDLR	NM_000527.5(LDLR):c.1731G>C (p.Trp577Cys)	Uncertain Significance	1	4	Gene-specific
LDLR	NM_000527.5(LDLR):c.859G>T (p.Gly287Cys)	Pathogenic	1	4	Gene-specific
LDLR	NM_000527.5(LDLR):c.2473A>G (p.Asn825Asp)	Likely Pathogenic	1	4	Gene-specific
LDLR	NM_000527.5(LDLR):c.1301C>T (p.Thr434Met)	Uncertain Significance	-1	-4	Gene-specific
LDLR	NM_000527.5(LDLR):c.1187G>A (p.Gly396Asp)	Uncertain Significance	0	0	Gene-specific
LDLR	NM_000527.5(LDLR):c.1187G>T (p.Gly396Val)	Uncertain Significance	0	1	Gene-specific
LDLR	NM_000527.5(LDLR):c.1553A>G (p.Lys518Arg)	Uncertain Significance	-1	-4	Gene-specific
LDLR	NM_000527.5(LDLR):c.1907G>A (p.Gly636Asp)	Uncertain Significance	1	4	Gene-specific
LDLR	NM_000527.5(LDLR):c.1907G>T (p.Gly636Val)	Uncertain Significance	1	4	Gene-specific
LDLR	NM_000527.5(LDLR):c.47T>C (p.Leu16Pro)	Uncertain Significance	0	4	Gene-specific
LDLR	NM_000527.5(LDLR):c.46C>G (p.Leu16Val)	Uncertain Significance	-1	-3	Gene-specific
LDLR	NM_000527.5(LDLR):c.1618G>A (p.Ala540Thr)	Pathogenic	1	0	Gene-specific
LDLR	NM_000527.4(LDLR):c.1774G>A (p.Gly592Arg)	Likely Pathogenic	1	4	Gene-specific
LDLR	NM_000527.5(LDLR):c.44T>C (p.Leu15Pro)	Likely Pathogenic	0	4	Gene-specific
LDLR	NM_000527.5(LDLR):c.932A>G (p.Lys311Arg)	Uncertain Significance	0	-4	Gene-specific
LDLR	NM_000527.5(LDLR):c.1322T>A (p.Ile441Asn)	Uncertain Significance	1	4	Gene-specific
LDLR	NM_000527.5(LDLR):c.718G>A (p.Glu240Lys)	Pathogenic	1	0	Gene-specific
LDLR	NM_000527.5(LDLR):c.2098G>A (p.Asp700Asn)	Likely Pathogenic	0	0	Gene-specific
LDLR	NM_000527.5(LDLR):c.805G>A (p.Gly269Ser)	Uncertain Significance	0	0	Gene-specific
LDLR	NM_000527.5(LDLR):c.1222G>C (p.Glu408Gln)	Uncertain Significance	1	1	Gene-specific
LDLR	NM_000527.5(LDLR):c.1223A>T (p.Glu408Val)	Likely Pathogenic	1	3	Gene-specific
LDLR	NM_000527.5(LDLR):c.977C>T (p.Ser326Phe)	Likely Pathogenic	1	0	Gene-specific
LDLR	NM_000527.5(LDLR):c.796G>A (p.Asp266Asn)	Pathogenic	1	3	Gene-specific
LDLR	NM_000527.5(LDLR):c.1577C>G (p.Pro526Arg)	Uncertain Significance	1	4	Gene-specific
LDLR	NM_000527.5(LDLR):c.1577C>T (p.Pro526Leu)	Uncertain Significance	1	4	Gene-specific
LDLR	NM_000527.5(LDLR):c.530C>T (p.Ser177Leu)	Pathogenic	1	4	Gene-specific
LDLR	NM_000527.5(LDLR):c.662A>G (p.Asp221Gly)	Pathogenic	1	4	Gene-specific
LDLR	NM_000527.5(LDLR):c.2252G>A (p.Arg751Gln)	Uncertain Significance	0	-4	Gene-specific
LDLR	NM_000527.5(LDLR):c.590G>T (p.Cys197Phe)	Likely Pathogenic	1	0	Gene-specific
LDLR	NM_000527.5(LDLR):c.970G>T (p.Gly324Cys)	Uncertain Significance	1	1	Gene-specific
LDLR	NM_000527.5(LDLR):c.1817C>A (p.Ala606Asp)	Uncertain Significance	1	0	Gene-specific
LDLR	NM_000527.5(LDLR):c.1856T>G (p.Phe619Cys)	Likely Pathogenic	1	4	Gene-specific
LDLR	NM_000527.5(LDLR):c.895G>T (p.Ala299Ser)	Uncertain Significance	0	-4	Gene-specific
LDLR	NM_000527.5(LDLR):c.2113G>C (p.Ala705Pro)	Uncertain Significance	1	1	Gene-specific
LDLR	NM_000527.5(LDLR):c.758G>A (p.Arg253Gln)	Uncertain Significance	-1	0	Gene-specific
LDLR	NM_000527.5(LDLR):c.758G>C (p.Arg253Pro)	Uncertain Significance	1	4	Gene-specific
LDLR	NM_000527.5(LDLR):c.2100C>G (p.Asp700Glu)	Uncertain Significance	0	0	Gene-specific
LDLR	NM_000527.5(LDLR):c.910G>A (p.Asp304Asn)	Pathogenic	1	4	Gene-specific
LDLR	NM_000527.5(LDLR):c.1783C>T (p.Arg595Trp)	Pathogenic	1	4	Gene-specific
LDLR	NM_000527.5(LDLR):c.1775G>A (p.Gly592Glu)	Pathogenic	1	4	Gene-specific
LDLR	NM_000527.5(LDLR):c.862G>A (p.Glu288Lys)	Pathogenic	1	3	Gene-specific
LDLR	NM_000527.5(LDLR):c.268G>T (p.Asp90Tyr)	Likely Pathogenic	1	4	Gene-specific
LDLR	NM_000527.5(LDLR):c.681C>G (p.Asp227Glu)	Pathogenic	1	3	Gene-specific
LDLR	NM_000527.5(LDLR):c.1414G>A (p.Asp472Asn)	Uncertain Significance	-1	-4	Gene-specific
LDLR	NM_000527.5(LDLR):c.1175G>A (p.Cys392Tyr)	Likely Pathogenic	1	4	Gene-specific
LDLR	NM_000527.5(LDLR):c.510C>A (p.Asp170Glu)	Likely Pathogenic	0	-4	Gene-specific
LDLR	NM_000527.5(LDLR):c.2149G>A (p.Ala717Thr)	Uncertain Significance	-1	-4	Gene-specific
LDLR	NM_000527.5(LDLR):c.2291T>G (p.Ile764Arg)	Uncertain Significance	-1	0	Gene-specific
LDLR	NM_000527.5(LDLR):c.2147A>C (p.Glu716Ala)	Uncertain Significance	-1	-4	Gene-specific
LDLR	NM_000527.5(LDLR):c.1590C>A (p.Phe530Leu)	Uncertain Significance	1	0	Gene-specific
LDLR	NM_000527.5(LDLR):c.2051C>T (p.Ala684Val)	Uncertain Significance	1	0	Gene-specific
LDLR	NM_000527.5(LDLR):c.1837G>A (p.Val613Ile)	Uncertain Significance	0	-4	Gene-specific
LDLR	NM_000527.5(LDLR):c.1840T>A (p.Phe614Ile)	Likely Pathogenic	1	4	Gene-specific
LDLR	NM_000527.5(LDLR):c.919G>A (p.Asp307Asn)	Likely Pathogenic	1	4	Gene-specific
LDLR	NM_000527.5(LDLR):c.919G>C (p.Asp307His)	Uncertain Significance	1	4	Gene-specific
LDLR	NM_000527.5(LDLR):c.921T>G (p.Asp307Glu)	Uncertain Significance	1	4	Gene-specific
LDLR	NM_000527.5(LDLR):c.1210A>C (p.Thr404Pro)	Uncertain Significance	1	4	Gene-specific
LDLR	NM_000527.5(LDLR):c.727T>C (p.Cys243Arg)	Likely Pathogenic	1	4	Gene-specific
LDLR	NM_000527.5(LDLR):c.1403T>A (p.Val468Asp)	Uncertain Significance	1	4	Gene-specific
LDLR	NM_000527.5(LDLR):c.1003G>T (p.Gly335Cys)	Likely Pathogenic	1	4	Gene-specific
LDLR	NM_000527.5(LDLR):c.1069G>A (p.Glu357Lys)	Likely Pathogenic	1	3	Gene-specific
LDLR	NM_000527.5(LDLR):c.846C>A (p.Phe282Leu)	Likely Pathogenic	1	4	Gene-specific
LDLR	NM_000527.5(LDLR):c.845T>G (p.Phe282Cys)	Uncertain Significance	1	4	Gene-specific
LDLR	NM_000527.5(LDLR):c.1729T>G (p.Trp577Gly)	Pathogenic	1	4	Gene-specific
LDLR	NM_000527.5(LDLR):c.2446A>C (p.Lys816Gln)	Uncertain Significance	0	0	Gene-specific
LDLR	NM_000527.5(LDLR):c.1028G>A (p.Gly343Asp)	Likely Pathogenic	1	4	Gene-specific
LDLR	NM_000527.5(LDLR):c.250C>T (p.Pro84Ser)	Uncertain Significance	0	-2	Gene-specific
LDLR	NM_000527.5(LDLR):c.251C>G (p.Pro84Arg)	Uncertain Significance	0	1	Gene-specific
LDLR	NM_000527.5(LDLR):c.1301C>G (p.Thr434Arg)	Pathogenic	0	0	Gene-specific
LDLR	NM_000527.5(LDLR):c.770G>A (p.Arg257Gln)	Uncertain Significance	-1	-2	Gene-specific
LDLR	NM_000527.5(LDLR):c.770G>C (p.Arg257Pro)	Uncertain Significance	0	4	Gene-specific
LDLR	NM_000527.5(LDLR):c.1906G>A (p.Gly636Ser)	Uncertain Significance	1	4	Gene-specific
LDLR	NM_000527.5(LDLR):c.170A>C (p.Asp57Ala)	Uncertain Significance	1	4	Gene-specific
LDLR	NM_000527.5(LDLR):c.233G>A (p.Arg78His)	Uncertain Significance	1	-3	Gene-specific
LDLR	NM_000527.5(LDLR):c.44T>A (p.Leu15His)	Uncertain Significance	0	2	Gene-specific
LDLR	NM_000527.5(LDLR):c.1721G>T (p.Arg574Leu)	Uncertain Significance	1	4	Gene-specific
LDLR	NM_000527.5(LDLR):c.1323C>G (p.Ile441Met)	Uncertain Significance	1	0	Gene-specific
LDLR	NM_000527.5(LDLR):c.976T>C (p.Ser326Pro)	Uncertain Significance	1	3	Gene-specific
LDLR	NM_000527.4(LDLR):c.59G>A (p.Gly20Glu)	Uncertain Significance	-1	-4	Gene-specific
LDLR	NM_000527.5(LDLR):c.1361C>A (p.Thr454Asn)	Likely Pathogenic	0	-1	Gene-specific
LDLR	NM_000527.5(LDLR):c.2479G>T (p.Val827Phe)	Uncertain Significance	1	4	Gene-specific
LDLR	NM_000527.5(LDLR):c.2480T>A (p.Val827Asp)	Uncertain Significance	1	4	Gene-specific
LDLR	NM_000527.5(LDLR):c.858C>A (p.Ser286Arg)	Likely Pathogenic	1	1	Gene-specific
LDLR	NM_000527.5(LDLR):c.1577C>A (p.Pro526His)	Uncertain Significance	1	4	Gene-specific
LDLR	NM_000527.5(LDLR):c.1216C>T (p.Arg406Trp)	Pathogenic	1	2	Gene-specific
LDLR	NM_000527.5(LDLR):c.974G>A (p.Cys325Tyr)	Likely Pathogenic	1	4	Gene-specific
LDLR	NM_000527.5(LDLR):c.2099A>G (p.Asp700Gly)	Likely Pathogenic	1	2	Gene-specific
LDLR	NM_000527.5(LDLR):c.2101G>A (p.Gly701Ser)	Uncertain Significance	1	0	Gene-specific
LDLR	NM_000527.5(LDLR):c.2096C>T (p.Pro699Leu)	Uncertain Significance	1	3	Gene-specific
LDLR	NM_000527.5(LDLR):c.1322T>C (p.Ile441Thr)	Pathogenic	1	1	Gene-specific
LDLR	NM_000527.5(LDLR):c.1222G>A (p.Glu408Lys)	Likely Pathogenic	1	2	Gene-specific
LDLR	NM_000527.5(LDLR):c.1217G>A (p.Arg406Gln)	Likely Pathogenic	1	0	Gene-specific
LDLR	NM_000527.5(LDLR):c.1055G>A (p.Cys352Tyr)	Likely Pathogenic	1	4	Gene-specific
LDLR	NM_000527.5(LDLR):c.967G>A (p.Gly323Ser)	Uncertain Significance	1	0	Gene-specific
LDLR	NM_000527.5(LDLR):c.693C>G (p.Cys231Trp)	Likely Pathogenic	1	4	Gene-specific
LDLR	NM_000527.5(LDLR):c.139G>A (p.Asp47Asn)	Uncertain Significance	0	4	Gene-specific
LDLR	NM_000527.5(LDLR):c.710G>A (p.Arg237His)	Uncertain Significance	1	-4	Gene-specific
LDLR	NM_000527.5(LDLR):c.1793T>C (p.Ile598Thr)	Uncertain Significance	0	1	Gene-specific
LDLR	NM_000527.5(LDLR):c.1381G>A (p.Gly461Ser)	Uncertain Significance	-1	-4	Gene-specific
LDLR	NM_000527.5(LDLR):c.508G>A (p.Asp170Asn)	Uncertain Significance	0	0	Gene-specific
LDLR	NM_000527.5(LDLR):c.1088C>T (p.Thr363Ile)	Uncertain Significance	-1	0	Gene-specific
LDLR	NM_000527.5(LDLR):c.949G>A (p.Glu317Lys)	Uncertain Significance	1	0	Gene-specific
LDLR	NM_000527.5(LDLR):c.2224A>G (p.Thr742Ala)	Uncertain Significance	-1	-4	Gene-specific
LDLR	NM_000527.5(LDLR):c.1154T>C (p.Leu385Pro)	Uncertain Significance	1	3	Gene-specific
LDLR	NM_000527.5(LDLR):c.1154T>G (p.Leu385Arg)	Uncertain Significance	0	0	Gene-specific
LDLR	NM_000527.5(LDLR):c.1942T>C (p.Ser648Pro)	Likely Pathogenic	0	0	Gene-specific
LDLR	NM_000527.5(LDLR):c.1393T>A (p.Tyr465Asn)	Uncertain Significance	1	0	Gene-specific
LDLR	NM_000527.5(LDLR):c.664T>C (p.Cys222Arg)	Likely Pathogenic	1	4	Gene-specific
LDLR	NM_000527.5(LDLR):c.1210A>T (p.Thr404Ser)	Uncertain Significance	0	0	Gene-specific
LDLR	NM_000527.5(LDLR):c.1793T>A (p.Ile598Asn)	Uncertain Significance	0	4	Gene-specific
LDLR	NM_000527.5(LDLR):c.1085A>C (p.Asp362Ala)	Uncertain Significance	0	0	Gene-specific
LDLR	NM_000527.5(LDLR):c.226G>C (p.Gly76Arg)	Uncertain Significance	1	0	Gene-specific
LDLR	NM_000527.5(LDLR):c.1448G>T (p.Trp483Leu)	Uncertain Significance	1	4	Gene-specific
LDLR	NM_000527.5(LDLR):c.1447T>C (p.Trp483Arg)	Uncertain Significance	1	4	Gene-specific
LDLR	NM_000527.5(LDLR):c.1449G>T (p.Trp483Cys)	Uncertain Significance	1	4	Gene-specific
LDLR	NM_000527.5(LDLR):c.2530G>A (p.Gly844Ser)	Uncertain Significance	1	3	Gene-specific
LDLR	NM_000527.5(LDLR):c.551G>C (p.Cys184Ser)	Likely Pathogenic	1	3	Gene-specific
LDLR	NM_000527.5(LDLR):c.1300A>C (p.Thr434Pro)	Uncertain Significance	0	0	Gene-specific
LDLR	NM_000527.5(LDLR):c.899G>A (p.Arg300Lys)	Uncertain Significance	-1	-1	Gene-specific
LDLR	NM_000527.5(LDLR):c.2177C>T (p.Thr726Ile)	Benign	-1	-4	Gene-specific
LDLR	NM_000527.5(LDLR):c.770G>T (p.Arg257Leu)	Uncertain Significance	0	0	Gene-specific
LDLR	NM_000527.5(LDLR):c.2375T>C (p.Ile792Thr)	Uncertain Significance	1	0	Gene-specific
LDLR	NM_000527.5(LDLR):c.1954A>G (p.Met652Val)	Uncertain Significance	0	0	Gene-specific
LDLR	NM_000527.5(LDLR):c.169G>A (p.Asp57Asn)	Uncertain Significance	1	4	Gene-specific
LDLR	NM_000527.5(LDLR):c.269A>C (p.Asp90Ala)	Likely Pathogenic	1	4	Gene-specific
LDLR	NM_000527.5(LDLR):c.268G>A (p.Asp90Asn)	Pathogenic	0	3	Gene-specific
LDLR	NM_000527.5(LDLR):c.139G>T (p.Asp47Tyr)	Uncertain Significance	1	4	Gene-specific
LDLR	NM_000527.5(LDLR):c.1241T>G (p.Leu414Arg)	Uncertain Significance	1	4	Gene-specific
LDLR	NM_000527.5(LDLR):c.1721G>A (p.Arg574His)	Likely Pathogenic	1	1	Gene-specific
LDLR	NM_000527.5(LDLR):c.418G>A (p.Glu140Lys)	Pathogenic	1	4	Gene-specific
LDLR	NM_000527.5(LDLR):c.269A>G (p.Asp90Gly)	Pathogenic	1	4	Gene-specific
LDLR	NM_000527.5(LDLR):c.1784G>A (p.Arg595Gln)	Pathogenic	1	3	Gene-specific
LDLR	NM_000527.5(LDLR):c.661G>T (p.Asp221Tyr)	Pathogenic	1	4	Gene-specific
LDLR	NM_000527.5(LDLR):c.911A>T (p.Asp304Val)	Uncertain Significance	1	4	Gene-specific
LDLR	NM_000527.5(LDLR):c.4G>A (p.Gly2Arg)	Uncertain Significance	0	-4	Gene-specific
LDLR	NM_000527.5(LDLR):c.709C>T (p.Arg237Cys)	Uncertain Significance	0	-3	Gene-specific
LDLR	NM_000527.5(LDLR):c.1158C>G (p.Asp386Glu)	Uncertain Significance	0	-3	Gene-specific
LDLR	NM_000527.5(LDLR):c.910G>C (p.Asp304His)	Uncertain Significance	1	4	Gene-specific
LDLR	NM_000527.5(LDLR):c.1024G>A (p.Asp342Asn)	Benign	-1	-4	Gene-specific
LDLR	NM_000527.5(LDLR):c.970G>A (p.Gly324Ser)	Benign	1	0	Gene-specific
LDLR	NM_000527.5(LDLR):c.2000G>A (p.Cys667Tyr)	Likely Pathogenic	1	4	Gene-specific
LDLR	NM_000527.5(LDLR):c.1965C>G (p.Phe655Leu)	Likely Pathogenic	0	0	Gene-specific
LDLR	NM_000527.5(LDLR):c.1855T>C (p.Phe619Leu)	Likely Pathogenic	1	4	Gene-specific
LDLR	NM_000527.5(LDLR):c.1576C>T (p.Pro526Ser)	Uncertain Significance	1	4	Gene-specific
LDLR	NM_000527.5(LDLR):c.1238C>T (p.Thr413Met)	Likely Pathogenic	0	-1	Gene-specific
LDLR	NM_000527.5(LDLR):c.907C>T (p.Arg303Trp)	Uncertain Significance	1	0	Gene-specific
LDLR	NM_000527.5(LDLR):c.1800G>C (p.Glu600Asp)	Uncertain Significance	0	-3	Gene-specific
LDLR	NM_000527.5(LDLR):c.1555C>A (p.Pro519Thr)	Uncertain Significance	1	3	Gene-specific
LDLR	NM_000527.5(LDLR):c.1555C>T (p.Pro519Ser)	Uncertain Significance	1	2	Gene-specific
LDLR	NM_000527.5(LDLR):c.1277T>G (p.Leu426Arg)	Likely Pathogenic	1	4	Gene-specific
LDLR	NM_000527.5(LDLR):c.1057G>A (p.Glu353Lys)	Uncertain Significance	0	0	Gene-specific
LDLR	NM_000527.5(LDLR):c.1504G>T (p.Asp502Tyr)	Uncertain Significance	0	0	Gene-specific
LDLR	NM_000527.5(LDLR):c.1441G>A (p.Val481Met)	Uncertain Significance	1	2	Gene-specific
LDLR	NM_000527.5(LDLR):c.1429G>A (p.Asp477Asn)	Uncertain Significance	0	0	Gene-specific
LDLR	NM_000527.5(LDLR):c.1153C>G (p.Leu385Val)	Uncertain Significance	-1	-4	Gene-specific
LDLR	NM_000527.5(LDLR):c.1027G>A (p.Gly343Ser)	Pathogenic	1	2	Gene-specific
LDLR	NM_000527.5(LDLR):c.299A>G (p.Asp100Gly)	Likely Pathogenic	1	4	Gene-specific
LDLR	NM_000527.5(LDLR):c.300C>G (p.Asp100Glu)	Uncertain Significance	0	1	Gene-specific
LDLR	NM_000527.5(LDLR):c.1069G>C (p.Glu357Gln)	Uncertain Significance	1	1	Gene-specific
LDLR	NM_000527.5(LDLR):c.915G>C (p.Trp305Cys)	Uncertain Significance	1	3	Gene-specific
LDLR	NM_000527.5(LDLR):c.844T>C (p.Phe282Leu)	Uncertain Significance	1	4	Gene-specific
LDLR	NM_000527.5(LDLR):c.845T>C (p.Phe282Ser)	Uncertain Significance	1	4	Gene-specific
LDLR	NM_000527.5(LDLR):c.2448G>C (p.Lys816Asn)	Uncertain Significance	-1	0	Gene-specific
LDLR	NM_000527.5(LDLR):c.251C>T (p.Pro84Leu)	Uncertain Significance	0	0	Gene-specific
LDLR	NM_000527.5(LDLR):c.1951G>A (p.Asp651Asn)	Likely Pathogenic	0	0	Gene-specific
LDLR	NM_000527.5(LDLR):c.1952A>T (p.Asp651Val)	Uncertain Significance	1	3	Gene-specific
LDLR	NM_000527.5(LDLR):c.2475C>A (p.Asn825Lys)	Pathogenic	1	4	Gene-specific
LDLR	NM_000527.5(LDLR):c.1301C>A (p.Thr434Lys)	Likely Pathogenic	0	0	Gene-specific
LDLR	NM_000527.5(LDLR):c.898A>G (p.Arg300Gly)	Likely Pathogenic	0	0	Gene-specific
LDLR	NM_000527.5(LDLR):c.1186G>C (p.Gly396Arg)	Uncertain Significance	1	0	Gene-specific
LDLR	NM_000527.5(LDLR):c.2374A>T (p.Ile792Phe)	Uncertain Significance	1	1	Gene-specific
LDLR	NM_000527.5(LDLR):c.1954A>T (p.Met652Leu)	Uncertain Significance	-1	-3	Gene-specific
LDLR	NM_000527.5(LDLR):c.1402G>A (p.Val468Ile)	Uncertain Significance	-1	-4	Gene-specific
LDLR	NM_000527.5(LDLR):c.1765G>A (p.Asp589Asn)	Uncertain Significance	-1	-3	Gene-specific
LDLR	NM_000527.5(LDLR):c.1796T>G (p.Leu599Trp)	Uncertain Significance	0	1	Gene-specific
LDLR	NM_000527.5(LDLR):c.1291G>A (p.Ala431Thr)	Pathogenic	1	0	Gene-specific
LDLR	NM_000527.5(LDLR):c.1291G>C (p.Ala431Pro)	Likely Pathogenic	1	4	Gene-specific
LDLR	NM_000527.5(LDLR):c.1618G>T (p.Ala540Ser)	Likely Pathogenic	1	0	Gene-specific
LDLR	NM_000527.5(LDLR):c.967G>T (p.Gly323Cys)	Likely Pathogenic	1	3	Gene-specific
LDLR	NM_000527.5(LDLR):c.889A>C (p.Asn297His)	Uncertain Significance	0	2	Gene-specific
LDLR	NM_000527.5(LDLR):c.890A>G (p.Asn297Ser)	Uncertain Significance	0	0	Gene-specific
LDLR	NM_000527.5(LDLR):c.259T>C (p.Trp87Arg)	Uncertain Significance	1	4	Gene-specific
LDLR	NM_000527.5(LDLR):c.301G>A (p.Glu101Lys)	Pathogenic	1	3	Gene-specific
LDLR	NM_000527.5(LDLR):c.1432G>A (p.Gly478Arg)	Pathogenic	1	4	Gene-specific
LDLR	NM_000527.5(LDLR):c.1223A>C (p.Glu408Ala)	Uncertain Significance	1	2	Gene-specific
LDLR	NM_000527.5(LDLR):c.1224G>C (p.Glu408Asp)	Uncertain Significance	-1	0	Gene-specific
LDLR	NM_000527.5(LDLR):c.1784G>T (p.Arg595Leu)	Likely Pathogenic	1	4	Gene-specific
LDLR	NM_000527.5(LDLR):c.797A>G (p.Asp266Gly)	Likely Pathogenic	1	4	Gene-specific
LDLR	NM_000527.5(LDLR):c.797A>T (p.Asp266Val)	Likely Pathogenic	1	4	Gene-specific
LDLR	NM_000527.5(LDLR):c.1576C>A (p.Pro526Thr)	Uncertain Significance	1	4	Gene-specific
LDLR	NM_000527.5(LDLR):c.682G>A (p.Glu228Lys)	Pathogenic	1	4	Gene-specific
LDLR	NM_000527.5(LDLR):c.895G>A (p.Ala299Thr)	Uncertain Significance	0	-4	Gene-specific
LDLR	NM_000527.5(LDLR):c.1156G>T (p.Asp386Tyr)	Uncertain Significance	1	2	Gene-specific
LDLR	NM_000527.5(LDLR):c.977C>G (p.Ser326Cys)	Pathogenic	1	0	Gene-specific
LDLR	NM_000527.5(LDLR):c.912C>G (p.Asp304Glu)	Likely Pathogenic	1	3	Gene-specific
LDLR	NM_000527.5(LDLR):c.1171G>A (p.Ala391Thr)	Benign	-1	-4	Gene-specific
LDLR	NM_000527.5(LDLR):c.185C>T (p.Thr62Met)	Uncertain Significance	0	-4	Gene-specific
LDLR	NM_000527.4(LDLR):c.185C>G (p.Thr62Arg)	Uncertain Significance	0	0	Gene-specific
LDLR	NM_000527.5(LDLR):c.2531G>A (p.Gly844Asp)	Likely Pathogenic	1	4	Gene-specific
LDLR	NM_000527.5(LDLR):c.2479G>A (p.Val827Ile)	Uncertain Significance	1	0	Gene-specific
LDLR	NM_000527.5(LDLR):c.910G>T (p.Asp304Tyr)	Likely Pathogenic	1	4	Gene-specific
LDLR	NM_000527.5(LDLR):c.1024G>T (p.Asp342Tyr)	Uncertain Significance	0	0	Gene-specific
LDLR	NM_000527.5(LDLR):c.806G>A (p.Gly269Asp)	Likely Benign	0	1	Gene-specific
LDLR	NM_000527.5(LDLR):c.798T>A (p.Asp266Glu)	Pathogenic	0	2	Gene-specific
LDLR	NM_000527.5(LDLR):c.344G>A (p.Arg115His)	Uncertain Significance	0	-3	Gene-specific
LDLR	NM_000527.5(LDLR):c.259T>G (p.Trp87Gly)	Pathogenic	1	4	Gene-specific
LDLR	NM_000527.5(LDLR):c.232C>T (p.Arg78Cys)	Uncertain Significance	0	0	Gene-specific
LDLR	NM_000527.5(LDLR):c.1381G>T (p.Gly461Cys)	Likely Pathogenic	0	-3	Gene-specific
LDLR	NM_000527.5(LDLR):c.865T>C (p.Cys289Arg)	Likely Pathogenic	1	4	Gene-specific
LDLR	NM_000527.5(LDLR):c.1916T>A (p.Val639Asp)	Pathogenic	0	2	Gene-specific
LDLR	NM_000527.5(LDLR):c.1431C>G (p.Asp477Glu)	Uncertain Significance	-1	-3	Gene-specific
LDLR	NM_000527.5(LDLR):c.337G>A (p.Glu113Lys)	Pathogenic	0	-2	Gene-specific
LDLR	NM_000527.5(LDLR):c.352G>T (p.Asp118Tyr)	Likely Pathogenic	0	2	Gene-specific
LDLR	NM_000527.5(LDLR):c.1463T>A (p.Ile488Asn)	Likely Pathogenic	1	4	Gene-specific
LDLR	NM_000527.5(LDLR):c.1243G>C (p.Asp415His)	Likely Pathogenic	1	0	Gene-specific
LDLR	NM_000527.5(LDLR):c.1898G>A (p.Arg633His)	Pathogenic	1	0	Gene-specific
LDLR	NM_000527.5(LDLR):c.1897C>T (p.Arg633Cys)	Pathogenic	1	1	Gene-specific
LDLR	NM_000527.5(LDLR):c.1898G>T (p.Arg633Leu)	Likely Pathogenic	1	2	Gene-specific
LDLR	NM_000527.5(LDLR):c.1981C>G (p.Pro661Ala)	Likely Pathogenic	0	-2	Gene-specific
LDLR	NM_000527.5(LDLR):c.1273A>G (p.Asn425Asp)	Uncertain Significance	-1	-3	Gene-specific
LDLR	NM_000527.5(LDLR):c.1190C>T (p.Ser397Phe)	Uncertain Significance	0	0	Gene-specific
LDLR	NM_000527.5(LDLR):c.1414G>T (p.Asp472Tyr)	Pathogenic	0	0	Gene-specific
LDLR	NM_000527.5(LDLR):c.2324T>C (p.Val775Ala)	Uncertain Significance	-1	-4	Gene-specific
LDLR	NM_000527.5(LDLR):c.2017A>C (p.Ser673Arg)	Uncertain Significance	0	-4	Gene-specific
LDLR	NM_000527.5(LDLR):c.1412G>A (p.Arg471Lys)	Uncertain Significance	-1	-4	Gene-specific
LDLR	NM_000527.5(LDLR):c.81C>G (p.Cys27Trp)	Pathogenic	1	4	Gene-specific
LDLR	NM_000527.5(LDLR):c.284G>A (p.Cys95Tyr)	Likely Pathogenic	1	4	Gene-specific
LDLR	NM_000527.5(LDLR):c.1796T>C (p.Leu599Ser)	Likely Pathogenic	1	2	Gene-specific
LDLR	NM_000527.5(LDLR):c.2119G>A (p.Asp707Asn)	Uncertain Significance	1	0	Gene-specific
LDLR	NM_000527.5(LDLR):c.1588T>G (p.Phe530Val)	Uncertain Significance	1	2	Gene-specific
LDLR	NM_000527.5(LDLR):c.1750T>C (p.Ser584Pro)	Likely Pathogenic	1	3	Gene-specific
LDLR	NM_000527.5(LDLR):c.1244A>T (p.Asp415Val)	Uncertain Significance	1	1	Gene-specific
LDLR	NM_000527.5(LDLR):c.1957G>T (p.Val653Phe)	Uncertain Significance	0	0	Gene-specific
LDLR	NM_000527.5(LDLR):c.1981C>A (p.Pro661Thr)	Uncertain Significance	0	0	Gene-specific
LDLR	NM_000527.5(LDLR):c.1274A>T (p.Asn425Ile)	Uncertain Significance	0	0	Gene-specific
LDLR	NM_000527.5(LDLR):c.1189T>A (p.Ser397Thr)	Uncertain Significance	0	-4	Gene-specific
LDLR	NM_000527.5(LDLR):c.1825T>C (p.Phe609Leu)	Uncertain Significance	0	1	Gene-specific
LDLR	NM_000527.5(LDLR):c.1460A>G (p.Asn487Ser)	Uncertain Significance	1	0	Gene-specific
LDLR	NM_000527.5(LDLR):c.2050G>A (p.Ala684Thr)	Uncertain Significance	1	0	Gene-specific
LDLR	NM_000527.5(LDLR):c.283T>G (p.Cys95Gly)	Likely Pathogenic	1	4	Gene-specific
LDLR	NM_000527.5(LDLR):c.1958T>G (p.Val653Gly)	Uncertain Significance	0	0	Gene-specific
LDLR	NM_000527.5(LDLR):c.188G>A (p.Cys63Tyr)	Uncertain Significance	1	4	Gene-specific
LDLR	NM_000527.5(LDLR):c.1761C>G (p.Ser587Arg)	Uncertain Significance	0	2	Gene-specific
LDLR	NM_000527.5(LDLR):c.2323G>A (p.Val775Ile)	Uncertain Significance	-1	-4	Gene-specific
LDLR	NM_000527.5(LDLR):c.2018G>A (p.Ser673Asn)	Uncertain Significance	-1	-4	Gene-specific
LDLR	NM_000527.5(LDLR):c.1463T>C (p.Ile488Thr)	Likely Pathogenic	1	3	Gene-specific
LDLR	NM_000527.5(LDLR):c.1463T>G (p.Ile488Ser)	Uncertain Significance	1	4	Gene-specific
LDLR	NM_000527.5(LDLR):c.1244A>G (p.Asp415Gly)	Likely Pathogenic	0	0	Gene-specific
LDLR	NM_000527.5(LDLR):c.905G>A (p.Cys302Tyr)	Likely Pathogenic	1	4	Gene-specific
LDLR	NM_000527.5(LDLR):c.1957G>A (p.Val653Ile)	Uncertain Significance	-1	-4	Gene-specific
LDLR	NM_000527.5(LDLR):c.1982C>T (p.Pro661Leu)	Uncertain Significance	0	0	Gene-specific
LDLR	NM_000527.5(LDLR):c.1189T>C (p.Ser397Pro)	Uncertain Significance	0	0	Gene-specific
MECP2	NM_001110792.2(MECP2):c.686C>T (p.Pro229Leu)	Likely Pathogenic	0	0	Gene-specific
MECP2	NM_001110792.2(MECP2):c.1177C>T (p.Pro393Ser)	Likely Benign	0	-1	Gene-specific
MECP2	NM_001110792.2(MECP2):c.860T>C (p.Val287Ala)	Benign	0	-2	Gene-specific
MECP2	NM_001110792.2(MECP2):c.1250C>T (p.Pro417Leu)	Benign	0	0	Gene-specific
MECP2	NM_001110792.2(MECP2):c.488A>G (p.Asp163Gly)	Likely Pathogenic	1	3	Gene-specific
MECP2	NM_001110792.2(MECP2):c.1120C>T (p.Pro374Ser)	Likely Benign	0	-1	Gene-specific
MECP2	NM_001110792.2(MECP2):c.784C>T (p.Arg262Cys)	Likely Benign	0	0	Gene-specific
MECP2	NM_001110792.2(MECP2):c.379C>T (p.Arg127Cys)	Uncertain Significance	1	2	Gene-specific
[truncated: 3,382 more rows]
